# Supplementary material for: A transcriptional atlas of early Arabidopsis seed development suggests mechanisms for inter-tissue coordination
Source: Research Square preprint supplement (doi:10.21203/rs.3.rs-6560595/v1), 2025-05-16
Supplement: Supplementary file 3 [file 275790df487d8833c0262dc6.xlsx]

## Sheet: 3 DAP
level_3_plotting	level_1_annotation	level_2_annotation	level_3_annotation_full	level_3_annotation_abbr	original_clusters_res_1.3	n_cells	top_markers_locus_IDs	top_markers_symbols	primary_cc_phase	primary_cc_phase_prop	top_BP_GO_ID	top_BP_GO_Description	top_MF_GO_ID	top_MF_GO_Description	top_CC_GO_ID	top_CC_GO_Description	mean_nFeature_RNA	mean_nCount_RNA	mean_percent_mito	mean_percent_chlor	mean_doublet_score	mean_percent_cc	mean_G2M_Score	mean_S_Score
1	Embryo	EMB	1. EMB (PDF1)	1. EMB	24	345	AT1G62410, AT4G09930, AT3G09110, AT2G31920, AT1G06080, AT5G08460, AT3G51740, AT3G21090, AT5G35770, AT5G25090, AT4G09940, AT1G08560, AT5G16250, AT4G31760, AT1G63100	NA, IAN11, NA, CORD7, ADS1,AtADS1, NA, IMK2, ABCG15, SAP, AtENODL13,ENODL13, IAN12, ATSYP111,KN,SYP111, NA, NA, SCL28	G2M	0.7217	GO:0000278, GO:0007017, GO:1903047, GO:1903046, GO:0000910, GO:0051321, GO:0007010, GO:0007018, GO:0051726, GO:0000280, GO:0000226, GO:0044770, GO:0048285, GO:0044772, GO:0010564	mitotic cell cycle, microtubule-based process, mitotic cell cycle process, meiotic cell cycle process, cytokinesis, meiotic cell cycle, cytoskeleton organization, microtubule-based movement, regulation of cell cycle, nuclear division, microtubule cytoskeleton organization, cell cycle phase transition, organelle fission, mitotic cell cycle phase transition, regulation of cell cycle process	GO:0008092, GO:0008017, GO:0015631, GO:0003774, GO:0003777, GO:0016538, GO:0019207, GO:0019887, GO:0016887, GO:0017111, GO:0080161, GO:0003779, GO:0010329, GO:0030332, GO:0000146	cytoskeletal protein binding, microtubule binding, tubulin binding, cytoskeletal motor activity, microtubule motor activity, cyclin-dependent protein serine/threonine kinase regulator activity, kinase regulator activity, protein kinase regulator activity, ATP hydrolysis activity, ribonucleoside triphosphate phosphatase activity, auxin transmembrane transporter activity, actin binding, auxin efflu…	GO:0005856, GO:0015630, GO:0005874, GO:0099081, GO:0099512, GO:0099513, GO:0099080, GO:0005875, GO:0005871, GO:0000307, GO:0005819, GO:0009524, GO:1902554, GO:0005815, GO:0005813	cytoskeleton, microtubule cytoskeleton, microtubule, supramolecular polymer, supramolecular fiber, polymeric cytoskeletal fiber, supramolecular complex, microtubule associated complex, kinesin complex, cyclin-dependent protein kinase holoenzyme complex, spindle, phragmoplast, serine/threonine protein kinase complex, microtubule organizing center, centrosome	1547	2590	0.9061	0.7875	0.02374	1.313	0.2773	0.0008671
2	Endosperm	CZE	2. CZE nodule-like (MEA)	2. CZE nod-like	23, 8, 11	193	AT1G28630, AT3G03240, AT1G73610, AT3G30842, AT4G02780, AT5G28000, AT1G42980, AT1G12672, AT1G44090, AT1G80330, AT1G61330, AT1G79370, AT3G05860, AT5G56369, AT5G65890	NA, NA, NA, ABCG38,ATPDR10,PDR10, ABC33,ATCPS1,CPS,CPS1,GA1, NA, NA, NA, ATGA20OX5,GA20OX5, ATGA3OX4,GA3OX4, NA, CYP79C1, AGL45, NA, ACR1	S	0.4249	GO:0042254, GO:0022613, GO:0015979, GO:0016072, GO:0006364, GO:0034470, GO:0019684, GO:0006778, GO:0015994, GO:0051276, GO:0033013, GO:0006310, GO:0006260, GO:0006261, GO:0006270	ribosome biogenesis, ribonucleoprotein complex biogenesis, photosynthesis, rRNA metabolic process, rRNA processing, ncRNA processing, photosynthesis, light reaction, porphyrin-containing compound metabolic process, chlorophyll metabolic process, chromosome organization, tetrapyrrole metabolic process, DNA recombination, DNA replication, DNA-templated DNA replication, DNA replication initiation	GO:0003735, GO:0004386, GO:0140097, GO:0030515, GO:0005198, GO:0003688, GO:0008094, GO:0003678, GO:0003697, GO:0008266, GO:0008187, GO:0017111, GO:0003724, GO:0008186, GO:0003727	structural constituent of ribosome, helicase activity, catalytic activity, acting on DNA, snoRNA binding, structural molecule activity, DNA replication origin binding, ATP-dependent activity, acting on DNA, DNA helicase activity, single-stranded DNA binding, poly(U) RNA binding, poly-pyrimidine tract binding, ribonucleoside triphosphate phosphatase activity, RNA helicase activity, ATP-dependent a…	GO:0009534, GO:0031976, GO:0034357, GO:0042651, GO:0055035, GO:0009535, GO:0042170, GO:0005694, GO:0030684, GO:0031977, GO:0009521, GO:0009543, GO:0005840, GO:0031978, GO:0000228	chloroplast thylakoid, plastid thylakoid, photosynthetic membrane, thylakoid membrane, plastid thylakoid membrane, chloroplast thylakoid membrane, plastid membrane, chromosome, preribosome, thylakoid lumen, photosystem, chloroplast thylakoid lumen, ribosome, plastid thylakoid lumen, nuclear chromosome	2041	3596	0.3889	0.5724	0.01615	0.2996	0.0132	0.07735
3	Endosperm	CZE	3. CZE basal cyst (RALFL3)	3. CZE basal cyst	19, 23, 5, 11	78	AT4G15040, AT1G59800, AT4G08560, AT2G44240, AT3G27835, AT3G05741, AT3G61175, AT5G62627, AT2G31953, AT1G23147, AT1G63055, AT3G13370, AT5G38197, AT3G61177, AT2G15325	NA, NA, APUM15,PUM15, NA, NA, PMEI15, LCR52, NA, LCR76, RALFL3, NA, NA, NA, LCR53, NA	G1	0.4487	NA	NA	GO:0097602	cullin family protein binding	NA	NA	1633	3118	1.001	0.7351	0.02912	0.1426	-0.01713	-0.006909
4	Endosperm	CZE	4. CZE nodule (CYCD4;2)	4. CZE nodule	23	166	AT5G35913, AT3G43530, AT4G04555, AT2G14695, AT5G35912, AT2G15260, AT2G44250, AT3G18550, AT5G42910, AT1G16980, AT4G03875, AT3G15960, AT1G35895, AT1G65640, AT3G03910	NA, NA, NA, NA, NA, NA, NA, AtBRC1,ATTCP18,BRC1,TCP18, NA, ATTPS2,TPS2, NA, NA, NA, DEG4,DegP4, GDH3	G2M	0.4759	GO:0010498, GO:0006974, GO:0007059, GO:0043161, GO:0006281, GO:0051726, GO:0051276, GO:0006310, GO:0098813, GO:0140013, GO:0000280, GO:0010564, GO:0048285, GO:0044770, GO:0061982	proteasomal protein catabolic process, cellular response to DNA damage stimulus, chromosome segregation, proteasome-mediated ubiquitin-dependent protein catabolic process, DNA repair, regulation of cell cycle, chromosome organization, DNA recombination, nuclear chromosome segregation, meiotic nuclear division, nuclear division, regulation of cell cycle process, organelle fission, cell cycle phase…	GO:0140097, GO:0016887, GO:0017111, GO:0008094, GO:0036402, GO:0003697, GO:0004842, GO:0019787, GO:0019783, GO:0003688, GO:0101005, GO:0003682, GO:0003678, GO:0008092, GO:0004843	catalytic activity, acting on DNA, ATP hydrolysis activity, ribonucleoside triphosphate phosphatase activity, ATP-dependent activity, acting on DNA, proteasome-activating activity, single-stranded DNA binding, ubiquitin-protein transferase activity, ubiquitin-like protein transferase activity, ubiquitin-like protein peptidase activity, DNA replication origin binding, deubiquitinase activity, chro…	GO:0000502, GO:1905369, GO:1905368, GO:0005839, GO:0005838, GO:0022624, GO:0005694, GO:0000793, GO:0034357, GO:0042651, GO:0009535, GO:0055035, GO:0019773, GO:0009534, GO:0008540	proteasome complex, endopeptidase complex, peptidase complex, proteasome core complex, proteasome regulatory particle, proteasome accessory complex, chromosome, condensed chromosome, photosynthetic membrane, thylakoid membrane, chloroplast thylakoid membrane, plastid thylakoid membrane, proteasome core complex, alpha-subunit complex, chloroplast thylakoid, proteasome regulatory particle, base sub…	2214	4259	0.3467	0.5481	0.002775	0.35	0.03064	0.007464
5	Endosperm	MCE	5. MCE (ARF13)	5. MCE	11	759	AT1G29600, AT4G23090, AT2G01560, AT2G19220, AT1G34170, AT1G43960, AT2G19510, AT1G09550, AT4G10210, AT1G34410, AT1G68210, AT1G36000, AT3G27785, AT2G12900, AT1G62340	NA, NA, NA, NA, ARF13, NA, LBD8, AtPAE1, NA, ARF21, APRR6,PRR6, LBD5, ATMYB118,MYB118,PGA37, bZIP33, ALE,ALE1	G2M	0.3781	GO:0015979, GO:0019684, GO:0009768, GO:0006091, GO:0009765, GO:0009767, GO:0015994, GO:0006778, GO:0000280, GO:0033013, GO:0009644, GO:0019685, GO:0019253, GO:0048285, GO:0007059, GO:0005996	photosynthesis, photosynthesis, light reaction, photosynthesis, light harvesting in photosystem I, generation of precursor metabolites and energy, photosynthesis, light harvesting, photosynthetic electron transport chain, chlorophyll metabolic process, porphyrin-containing compound metabolic process, nuclear division, tetrapyrrole metabolic process, response to high light intensity, photosynthesi…	GO:0016168, GO:0008017, GO:0015631, GO:0008092, GO:0008266, GO:0003774, GO:0003777, GO:0046982, GO:0030527, GO:0008187, GO:1901149, GO:0003727, GO:0050660, GO:0016634, GO:0033293	chlorophyll binding, microtubule binding, tubulin binding, cytoskeletal protein binding, poly(U) RNA binding, cytoskeletal motor activity, microtubule motor activity, protein heterodimerization activity, structural constituent of chromatin, poly-pyrimidine tract binding, salicylic acid binding, single-stranded RNA binding, flavin adenine dinucleotide binding, oxidoreductase activity, acting on th…	GO:0009534, GO:0031976, GO:0034357, GO:0042651, GO:0009535, GO:0055035, GO:0042170, GO:0009521, GO:0009522, GO:0098807, GO:0009538, GO:0009523, GO:0099081, GO:0099512, GO:0099513, GO:0010287	chloroplast thylakoid, plastid thylakoid, photosynthetic membrane, thylakoid membrane, chloroplast thylakoid membrane, plastid thylakoid membrane, plastid membrane, photosystem, photosystem I, chloroplast thylakoid membrane protein complex, photosystem I reaction center, photosystem II, supramolecular polymer, supramolecular fiber, polymeric cytoskeletal fiber, plastoglobule	1665	3185	0.4657	0.6865	0.01571	0.3118	0.02356	0.00262
6	Endosperm	PEN	6. PEN general (AGL62)	6. PEN	8	996	AT4G17860, AT1G29010, AT2G25120, AT1G37160, AT1G13650, AT4G10490, AT3G50720, AT3G58585, AT4G17505, AT5G50770, AT1G17150, AT1G63360, AT2G24810, AT1G55370, AT3G29639	NA, TIE3, NA, NA, NA, DLO2, PEG7, NA, DUF239, AtHSD6,HSD6, NA, NA, NA, NDF5, NA	S	0.4297	GO:0015979, GO:0042254, GO:0016072, GO:0006364, GO:0034470, GO:0022613, GO:0019684, GO:0006778, GO:0033013, GO:0009451, GO:0015994, GO:0009657, GO:0006260, GO:0051276, GO:0006261	photosynthesis, ribosome biogenesis, rRNA metabolic process, rRNA processing, ncRNA processing, ribonucleoprotein complex biogenesis, photosynthesis, light reaction, porphyrin-containing compound metabolic process, tetrapyrrole metabolic process, RNA modification, chlorophyll metabolic process, plastid organization, DNA replication, chromosome organization, DNA-templated DNA replication	GO:0003697, GO:0140101, GO:0140097, GO:0004386, GO:0016853, GO:0030515, GO:0008094, GO:0003688, GO:0003727, GO:0003678, GO:0008173, GO:0003735, GO:0016168, GO:0017111, GO:0004176, GO:0008266	single-stranded DNA binding, catalytic activity, acting on a tRNA, catalytic activity, acting on DNA, helicase activity, isomerase activity, snoRNA binding, ATP-dependent activity, acting on DNA, DNA replication origin binding, single-stranded RNA binding, DNA helicase activity, RNA methyltransferase activity, structural constituent of ribosome, chlorophyll binding, ribonucleoside triphosphate ph…	GO:0009534, GO:0031976, GO:0034357, GO:0042651, GO:0055035, GO:0009535, GO:0042170, GO:0031977, GO:0030684, GO:0009543, GO:0031978, GO:0005694, GO:0009521, GO:0032040, GO:0000228	chloroplast thylakoid, plastid thylakoid, photosynthetic membrane, thylakoid membrane, plastid thylakoid membrane, chloroplast thylakoid membrane, plastid membrane, thylakoid lumen, preribosome, chloroplast thylakoid lumen, plastid thylakoid lumen, chromosome, photosystem, small-subunit processome, nuclear chromosome	2419	4343	0.3028	0.6015	0.002894	0.3034	0.005426	0.08712
7	Endosperm	PEN	7. PEN G2/M-phase (AGL62 and TOPII)	7. PEN g2/m-phase	28	216	AT3G05445, AT3G44766, AT3G28153, AT3G28155, AT4G11080, AT3G58650, AT5G66840, AT5G55520, AT3G44769, AT3G44765, AT2G33560, AT3G27730, AT3G44763, AT4G01730, AT4G38062	NA, NA, NA, NA, 3xHMG-box1, TRM7, NA, NA, NA, NA, BUBR1, MER3,RCK, NA, NA, NA	G2M	1	GO:0015979, GO:0019684, GO:0006778, GO:0033013, GO:0015994, GO:0009657, GO:0016072, GO:0006091, GO:0006364, GO:0009767, GO:0034470, GO:0033014, GO:0042254, GO:0009658, GO:0006779	photosynthesis, photosynthesis, light reaction, porphyrin-containing compound metabolic process, tetrapyrrole metabolic process, chlorophyll metabolic process, plastid organization, rRNA metabolic process, generation of precursor metabolites and energy, rRNA processing, photosynthetic electron transport chain, ncRNA processing, tetrapyrrole biosynthetic process, ribosome biogenesis, chloroplast o…	GO:0016853, GO:0008017, GO:0003777, GO:0015631, GO:0003774, GO:0008266, GO:0140101, GO:0008092, GO:0003727, GO:0016168, GO:0030515, GO:0017111, GO:0008187, GO:0140097, GO:0019887, GO:0003755	isomerase activity, microtubule binding, microtubule motor activity, tubulin binding, cytoskeletal motor activity, poly(U) RNA binding, catalytic activity, acting on a tRNA, cytoskeletal protein binding, single-stranded RNA binding, chlorophyll binding, snoRNA binding, ribonucleoside triphosphate phosphatase activity, poly-pyrimidine tract binding, catalytic activity, acting on DNA, protein kinas…	GO:0031976, GO:0009534, GO:0034357, GO:0042651, GO:0055035, GO:0009535, GO:0042170, GO:0031977, GO:0009543, GO:0031978, GO:0009521, GO:0042646, GO:0009295, GO:0009523, GO:0015630	plastid thylakoid, chloroplast thylakoid, photosynthetic membrane, thylakoid membrane, plastid thylakoid membrane, chloroplast thylakoid membrane, plastid membrane, thylakoid lumen, chloroplast thylakoid lumen, plastid thylakoid lumen, photosystem, plastid nucleoid, nucleoid, photosystem II, microtubule cytoskeleton	2805	5152	0.2855	0.5029	0.001503	2.078	0.6723	-0.1158
8	Funiculus	FUN	8. FUN hilum (ADPG1)	8. FUN hil	22	366	AT1G03850, AT2G04025, AT3G57510, AT1G16960, AT5G60720, AT4G14130, AT5G03890, AT3G62820, AT3G09930, AT3G60970, AT1G71050, AT1G03010, AT2G16890, AT5G06839, AT4G31610	ATGRXS13,GRXS13,ROXY18, GLV7,RGF3, ADPG1, NA, NA, XTH15,XTR7, NA, NA, NA, ABCC15,ATMRP15,MRP15, AtHMP15,HIPP20, NA, NA, bZIP65,TGA10, ATREM1,REM1,REM34	G1	0.5546	GO:0048437, GO:0009639, GO:0009991, GO:0048438, GO:0007389, GO:0010252, GO:0031667, GO:0048653, GO:0003002, GO:0140115, GO:0003008, GO:0003013, GO:0003018, GO:0010232, GO:0010233, GO:0000272	floral organ development, response to red or far red light, response to extracellular stimulus, floral whorl development, pattern specification process, auxin homeostasis, response to nutrient levels, anther development, regionalization, export across plasma membrane, system process, circulatory system process, vascular process in circulatory system, vascular transport, phloem transport, polysacc…	GO:0060089, GO:0038023, GO:0000987, GO:0008559, GO:0010329, GO:0000978, GO:0000981, GO:0080161, GO:0004888, GO:0000977, GO:0030599, GO:0019199, GO:0042802, GO:0016762, GO:0015171	molecular transducer activity, signaling receptor activity, cis-regulatory region sequence-specific DNA binding, ABC-type xenobiotic transporter activity, auxin efflux transmembrane transporter activity, RNA polymerase II cis-regulatory region sequence-specific DNA binding, DNA-binding transcription factor activity, RNA polymerase II-specific, auxin transmembrane transporter activity, transmembra…	NA	NA	959.9	1386	0.9481	0.661	0.006927	0.1174	-0.01618	-0.03944
9	Funiculus	FUN	9. FUN epidermal (CER3)	9. FUN epi	27	232	AT2G21140, AT4G26255, AT5G25390, AT3G23050, AT1G29670, AT1G04680, AT5G19190, AT4G17030, AT1G10657, AT2G22980, AT3G14520, AT5G44130, AT4G23340, AT3G12710, AT5G42180	ATPRP2,PRP2, NA, SHN3, AXR2,IAA7, GDSL1, NA, NA, AT-EXPR,ATEXLB1,ATEXPR1,ATHEXP,EXLB1,EXPR, DEG17, SCPL13, AtsesterTPS1,AtTPS18,TPS18, FLA13, NA, NA, PER64,PRX64	G1	0.7155	GO:0015979, GO:0019684, GO:0006091, GO:0009767, GO:0009765, GO:0009768, GO:0009642, GO:0022900, GO:0009409, GO:0042546, GO:0009769, GO:0009733, GO:0009773, GO:0015994, GO:0009832	photosynthesis, photosynthesis, light reaction, generation of precursor metabolites and energy, photosynthetic electron transport chain, photosynthesis, light harvesting, photosynthesis, light harvesting in photosystem I, response to light intensity, electron transport chain, response to cold, cell wall biogenesis, photosynthesis, light harvesting in photosystem II, response to auxin, photosynthe…	GO:0016168, GO:0046906, GO:0009055, GO:0045156, GO:0016798, GO:0016759, GO:0015267, GO:0022803, GO:0046527, GO:0016651, GO:0043531, GO:1901149, GO:0005372, GO:0015250, GO:0016829	chlorophyll binding, tetrapyrrole binding, electron transfer activity, electron transporter, transferring electrons within the cyclic electron transport pathway of photosynthesis activity, hydrolase activity, acting on glycosyl bonds, cellulose synthase activity, channel activity, passive transmembrane transporter activity, glucosyltransferase activity, oxidoreductase activity, acting on NAD(P)H,…	GO:0009534, GO:0009535, GO:0055035, GO:0031976, GO:0034357, GO:0042651, GO:0042170, GO:0009521, GO:0048046, GO:0009522, GO:0009523, GO:0098807, GO:0010287, GO:0009538, GO:0031977	chloroplast thylakoid, chloroplast thylakoid membrane, plastid thylakoid membrane, plastid thylakoid, photosynthetic membrane, thylakoid membrane, plastid membrane, photosystem, apoplast, photosystem I, photosystem II, chloroplast thylakoid membrane protein complex, plastoglobule, photosystem I reaction center, thylakoid lumen	1402	2282	1.26	1.888	0.03052	0.08042	-0.03684	-0.05422
10	Funiculus	FUN	10. FUN companion cells (SUC2)	10. FUN cc	30	48	AT2G16740, AT1G11080, AT3G21600, AT5G37730, AT4G01420, AT1G74810, AT3G61210, AT3G15650, AT2G18196, AT5G64240, AT1G21890, AT3G12890, AT3G25570, AT5G43380, AT5G27690	UBC29, scpl31, NA, NA, CBL5, BOR5, NA, NA, AtHMP16, AtMC3,AtMCP1a,MC3,MCP1a, UMAMIT19, ASML2, SAMDC3, TOPP6, AtHMP49	G1	0.8125	GO:0007389, GO:0003002, GO:0010087, GO:0006596, GO:0010088, GO:0009736, GO:0071368, GO:0003008, GO:0003013, GO:0003018, GO:0010232, GO:0010233, GO:0031667, GO:0140115, GO:0010073	pattern specification process, regionalization, phloem or xylem histogenesis, polyamine biosynthetic process, phloem development, cytokinin-activated signaling pathway, cellular response to cytokinin stimulus, system process, circulatory system process, vascular process in circulatory system, vascular transport, phloem transport, response to nutrient levels, export across plasma membrane, meriste…	GO:0016831, GO:0061650, GO:0001653	carboxy-lyase activity, ubiquitin-like protein conjugating enzyme activity, peptide receptor activity	NA	NA	1415	2463	1.362	0.8461	0.02196	0.07274	-0.03853	-0.057
11	Ovule	OVL	11. OVL scenescing (BFN1)	11. OVL senes	29	170	AT1G68620, AT3G48340, AT1G16950, AT1G69490, AT5G27350, AT1G11190, AT2G40370, AT2G32530, AT1G70680, AT4G35690, AT5G03435, AT1G08230, AT5G39610, AT2G05540, AT2G32510	NA, CEP2, NA, ANAC029,ATNAP,NAP, SFP1, BFN1,ENDO1, LAC5, ATCSLB03,ATCSLB3,CSLB03, NA, NA, MCTP13, NA, ANAC092,ATNAC2,ATNAC6,NAC2,NAC6,ORE1, NA, MAPKKK17	G1	0.6941	GO:0090693, GO:0010150, GO:0007568, GO:0071215, GO:0097306, GO:0031667, GO:0009751, GO:0009991, GO:0009738, GO:0009642, GO:0006865, GO:1901361, GO:0031669, GO:0009966, GO:0023051, GO:0003333	plant organ senescence, leaf senescence, aging, cellular response to abscisic acid stimulus, cellular response to alcohol, response to nutrient levels, response to salicylic acid, response to extracellular stimulus, abscisic acid-activated signaling pathway, response to light intensity, amino acid transport, organic cyclic compound catabolic process, cellular response to nutrient levels, regulati…	GO:0005342, GO:0046943, GO:0015171, GO:0004497, GO:0051213, GO:0004197, GO:0008234, GO:0016702, GO:0016705	organic acid transmembrane transporter activity, carboxylic acid transmembrane transporter activity, amino acid transmembrane transporter activity, monooxygenase activity, dioxygenase activity, cysteine-type endopeptidase activity, cysteine-type peptidase activity, oxidoreductase activity, acting on single donors with incorporation of molecular oxygen, incorporation of two atoms of oxygen, oxidor…	GO:0000323, GO:0005764, GO:0099503, GO:0005615, GO:0048046	lytic vacuole, lysosome, secretory vesicle, extracellular space, apoplast	879.8	1292	0.5436	0.454	0.02407	0.07017	-0.02895	-0.04071
12	Seed coat	CPT	12. CPT transient nucellus (PLL24)	12. CPT trans nuc	26	259	AT1G56710, AT1G07610, AT3G24230, AT4G02830, AT2G45660, AT3G62730, AT3G25930, AT5G25890, AT1G08465, AT1G34575, AT5G23190, AT1G75520, AT2G33750, AT4G18190, AT5G63180	PGL1, MT1C, NA, NA, AGL20,ATSOC1,SOC1, NA, NA, IAA28,IAR2, YAB2, AtBBE14, CYP86B1, SRS5, ATPUP2,PUP2, ATPUP6,PUP6, NA	G1	0.5135	GO:0010200, GO:0009698, GO:0009699, GO:0009813, GO:0009812, GO:0007568, GO:0046777, GO:1901617, GO:0044550, GO:0009962, GO:0048467, GO:1901605, GO:0046189, GO:0048440, GO:0010214, GO:1901615	response to chitin, phenylpropanoid metabolic process, phenylpropanoid biosynthetic process, flavonoid biosynthetic process, flavonoid metabolic process, aging, protein autophosphorylation, organic hydroxy compound biosynthetic process, secondary metabolite biosynthetic process, regulation of flavonoid biosynthetic process, gynoecium development, alpha-amino acid metabolic process, phenol-contain…	GO:0016837, GO:0015144, GO:0005372, GO:0015250, GO:0051119, GO:0004683, GO:0009931, GO:0010857, GO:0016835	carbon-oxygen lyase activity, acting on polysaccharides, carbohydrate transmembrane transporter activity, water transmembrane transporter activity, water channel activity, sugar transmembrane transporter activity, calmodulin-dependent protein kinase activity, calcium-dependent protein serine/threonine kinase activity, calcium-dependent protein kinase activity, carbon-oxygen lyase activity	NA	NA	1362	2342	0.7141	0.4401	0.03482	0.1125	-0.009775	-0.04034
13	Seed coat	CPT	13. CPT persistent nucellus (AGO3)	13. CPT pers nuc	19	377	AT1G20687, AT1G20683, AT3G11870, AT1G63950, AT3G62340, AT4G29640, AT4G18310, AT2G43261, AT1G61090, AT1G70380, AT1G51300, AT4G22400, AT4G18320, AT5G46300, AT3G10590	NA, NA, IRE1C, AtHMP13, AtWRKY68,WRKY68, NA, NA, NA, NA, NA, NA, NA, NA, NA, NA	G1	0.4589	GO:0006213, GO:0046133, GO:0046135, GO:0046131, GO:0009164, GO:0034656, GO:0042454, GO:0072529, GO:0009116, GO:0009119, GO:0072527, GO:1901658, GO:0048532, GO:0034728, GO:0009933	pyrimidine nucleoside metabolic process, pyrimidine ribonucleoside catabolic process, pyrimidine nucleoside catabolic process, pyrimidine ribonucleoside metabolic process, nucleoside catabolic process, nucleobase-containing small molecule catabolic process, ribonucleoside catabolic process, pyrimidine-containing compound catabolic process, nucleoside metabolic process, ribonucleoside metabolic pr…	GO:0030527, GO:0019239, GO:0016814, GO:0097602, GO:0015399, GO:0015453, GO:0016985, GO:0004567, GO:0015662, GO:0140358	structural constituent of chromatin, deaminase activity, hydrolase activity, acting on carbon-nitrogen (but not peptide) bonds, in cyclic amidines, cullin family protein binding, primary active transmembrane transporter activity, oxidoreduction-driven active transmembrane transporter activity, mannan endo-1,4-beta-mannosidase activity, beta-mannosidase activity, P-type ion transporter activity, P…	NA	NA	1633	2753	1.275	0.5361	0.03661	0.1559	-0.02548	0.02768
14	Seed coat	CZSC	14. CZSC fluid transport (ARR22 and AAP6)	14. CZSC fluid	10	805	AT5G49630, AT3G48290, AT1G27045, AT4G15160, AT3G59010, AT4G37390, AT4G37050, AT5G17980, AT2G26170, AT1G61660, AT3G13810, AT5G54660, AT4G37520, AT3G49360, AT4G29100	AAP6, CYP71A24, ATHB54,HB54, PAC2, PME35,PME61, AUR3,BRU6,GH3-2,GH3.2,YDK1, AtPLAIVC,PLA,PLAIII{beta},PLP4, MCTP16, CYP711A1,MAX1, AtbHLH112,PFA4, AtIDD11,IDD11, NA, NA, PGL2, BHLH68,PFA3	G1	0.6224	GO:0071215, GO:0097306, GO:0042594, GO:0071456, GO:0036294, GO:0071453, GO:0009991, GO:0031667, GO:0010118, GO:0009733, GO:0009738, GO:0010119, GO:0009751, GO:0007389, GO:0010200	cellular response to abscisic acid stimulus, cellular response to alcohol, response to starvation, cellular response to hypoxia, cellular response to decreased oxygen levels, cellular response to oxygen levels, response to extracellular stimulus, response to nutrient levels, stomatal movement, response to auxin, abscisic acid-activated signaling pathway, regulation of stomatal movement, response …	GO:0000981, GO:0000987, GO:0000978, GO:0000977, GO:0008559, GO:0005372, GO:0015250, GO:0060089, GO:0008889	DNA-binding transcription factor activity, RNA polymerase II-specific, cis-regulatory region sequence-specific DNA binding, RNA polymerase II cis-regulatory region sequence-specific DNA binding, RNA polymerase II transcription regulatory region sequence-specific DNA binding, ABC-type xenobiotic transporter activity, water transmembrane transporter activity, water channel activity, molecular trans…	NA	NA	1366	2123	0.4241	0.3718	0.01781	0.1093	-0.01819	-0.04493
15	Seed coat	CZSC	15. CZSC placentochalazal phosphate transport (ARR22, SWEET10, and UMAMIT14)	15. CZSC plac phos	17	525	AT3G26610, AT5G19530, AT2G36190, AT4G27420, AT2G37130, AT5G50790, AT2G33350, AT3G47510, AT1G20160, AT3G28345, AT2G32960, AT2G18570, AT1G68810, AT1G08165, AT1G28400	PGX1, ACL5, AtCWIN4,AtcwINV4,cwINV4, ABCG9, NA, AtSWEET10,SWEET10, NA, NA, ATSBT5.2,CRSP,SBT5.2(a),SBT5.2(b), ABCB15,MDR13, AtPFA-DSP2,PFA-DSP2, NA, ABS5,T5L1, NA, NA	G1	0.6171	GO:0009991, GO:0031667, GO:0006820, GO:0042594, GO:0010087, GO:0007389, GO:0003002, GO:0071215, GO:0097306, GO:0003008, GO:0003013, GO:0003018, GO:0010232, GO:0010233, GO:0001666	response to extracellular stimulus, response to nutrient levels, anion transport, response to starvation, phloem or xylem histogenesis, pattern specification process, regionalization, cellular response to abscisic acid stimulus, cellular response to alcohol, system process, circulatory system process, vascular process in circulatory system, vascular transport, phloem transport, response to hypoxia	GO:0060089, GO:0038023, GO:0042578, GO:0001653, GO:0000987, GO:0016791, GO:0042802, GO:0004725, GO:0000981, GO:0008509, GO:0051015, GO:0000978, GO:0008138, GO:0003779, GO:0019787	molecular transducer activity, signaling receptor activity, phosphoric ester hydrolase activity, peptide receptor activity, cis-regulatory region sequence-specific DNA binding, phosphatase activity, identical protein binding, protein tyrosine phosphatase activity, DNA-binding transcription factor activity, RNA polymerase II-specific, anion transmembrane transporter activity, actin filament bindin…	NA	NA	1465	2354	0.8265	0.5415	0.01216	0.1134	-0.0231	-0.04698
16	Seed coat	CZSC	16. CZSC placentochalazal callose-synthesizing (ARR22, TET5, and CALS8)	16. CZSC plac call	21	379	AT4G23410, AT3G14780, AT1G26450, AT5G50820, AT1G30080, AT2G28810, AT5G37660, AT4G23420, AT5G04310, AT3G47540, AT5G45320, AT3G14570, AT3G05327, AT5G02460, AT5G49320	TET5, NA, NA, anac097,NAC097, NA, NA, PDLP7, NA, PLL12, NA, NA, ATGSL04,atgsl4,gsl04,GSL04,GSL4, NA, PEAR2, NA	G1	0.6464	GO:0071215, GO:0097306, GO:0010087, GO:0009738, GO:0009966, GO:0010646, GO:0023051, GO:0007389, GO:0046351, GO:0006670, GO:0046512, GO:0016143, GO:0019757, GO:0019760, GO:1901657	cellular response to abscisic acid stimulus, cellular response to alcohol, phloem or xylem histogenesis, abscisic acid-activated signaling pathway, regulation of signal transduction, regulation of cell communication, regulation of signaling, pattern specification process, disaccharide biosynthetic process, sphingosine metabolic process, sphingosine biosynthetic process, S-glycoside metabolic proc…	GO:0060089, GO:0000981, GO:0038023, GO:0019902, GO:0000978, GO:0000987, GO:0019787, GO:0004842	molecular transducer activity, DNA-binding transcription factor activity, RNA polymerase II-specific, signaling receptor activity, phosphatase binding, RNA polymerase II cis-regulatory region sequence-specific DNA binding, cis-regulatory region sequence-specific DNA binding, ubiquitin-like protein transferase activity, ubiquitin-protein transferase activity	NA	NA	1665	2768	0.572	0.3973	0.009576	0.1343	-0.02397	-0.05596
17	Seed coat	ii1	17. ii1 endothelium (BAN and TT1)	17. ii1 endothel	6, 5	2658	AT5G53100, AT5G36925, AT4G24350, AT5G48740, AT1G49860, AT1G63140, AT4G13420, AT1G36060, AT4G20050, AT4G38030, AT3G16400, AT1G29660, AT4G11655, AT5G46040, AT5G03795	NA, ARACIN1, NA, NA, ATGSTF14,GSTF14, NA, ATHAK5,HAK5, TG,WIND3, QRT3, NA, ATMLP-470,ATNSP1,NSP1, NA, CASPL4A4, NA, NA	G1	0.3762	GO:0006631, GO:0009698, GO:0009699, GO:0072330, GO:0006633, GO:0044550, GO:0009813, GO:0010200, GO:0000038, GO:0009962, GO:0009812, GO:0001666, GO:0008544, GO:0009913, GO:0030855	fatty acid metabolic process, phenylpropanoid metabolic process, phenylpropanoid biosynthetic process, monocarboxylic acid biosynthetic process, fatty acid biosynthetic process, secondary metabolite biosynthetic process, flavonoid biosynthetic process, response to chitin, very long-chain fatty acid metabolic process, regulation of flavonoid biosynthetic process, flavonoid metabolic process, respo…	GO:0016746, GO:0102756, GO:0016747, GO:0016790, GO:1901681, GO:0000981	acyltransferase activity, very-long-chain 3-ketoacyl-CoA synthase activity, acyltransferase activity, transferring groups other than amino-acyl groups, thiolester hydrolase activity, sulfur compound binding, DNA-binding transcription factor activity, RNA polymerase II-specific	GO:0009705, GO:0005774	plant-type vacuole membrane, vacuolar membrane	1685	3426	0.7037	0.5092	0.03318	0.1336	-0.008109	0.0002872
18	Seed coat	ii1	18. ii1 basal (contains pigment strand) (BAN and SWEET4)	18. ii1 basal cont PS	15, 25	875	AT1G77380, AT1G55580, AT1G20490, AT1G21310, AT3G27200, AT4G03495, AT2G33330, AT4G02670, AT5G39160, AT1G70250, AT2G45960, AT1G25460, AT5G54840, AT3G23460, AT3G05470	AAP3,ATAAP3, LAS,SCL18, NA, ATEXT3,EXT3,RSH, NA, NA, PDLP3, AtIDD12,IDD12, NA, LTPG32, ATHH2,PIP1;2,PIP1B,TMP-A, NA, ATSGP1,SGP1, NA, FH11	G1	0.4183	GO:0009813, GO:0009698, GO:0009812, GO:0009699, GO:0009962, GO:0046189, GO:0044550, GO:0018958, GO:0006833, GO:0042044, GO:1901615, GO:1901617, GO:0046283, GO:0009718, GO:0010200	flavonoid biosynthetic process, phenylpropanoid metabolic process, flavonoid metabolic process, phenylpropanoid biosynthetic process, regulation of flavonoid biosynthetic process, phenol-containing compound biosynthetic process, secondary metabolite biosynthetic process, phenol-containing compound metabolic process, water transport, fluid transport, organic hydroxy compound metabolic process, org…	GO:0005372, GO:0015250, GO:0080030, GO:0038023	water transmembrane transporter activity, water channel activity, methyl indole-3-acetate esterase activity, signaling receptor activity	NA	NA	1253	2041	0.6908	0.4248	0.01366	0.1495	-0.003974	-0.01925
19	Seed coat	ii1'	19. ii1' (DELTAVPE and UMAMIT29)	19. ii1'	7	999	AT2G28550, AT5G24900, AT1G21470, AT3G07675, AT2G37460, AT5G17810, AT4G05985, AT5G26120, AT2G28660, AT4G01430, AT1G13970, AT2G40460, AT4G12370, AT5G06530, AT1G20500	RAP2.7,TOE1, CYP714A2,ELA2, NA, NA, UMAMIT12, WOX12, NA, ASD2,ATASD2, AtHMP18, UMAMIT29, NA, NA, NA, ABCG22,AtABCG22, NA	G1	0.7317	GO:0042546, GO:0010200, GO:0009832, GO:0010411, GO:0044264, GO:0006073, GO:0044042, GO:0010383, GO:0044036, GO:0010410, GO:0071555, GO:0009664, GO:0045229, GO:0016051, GO:0000271	cell wall biogenesis, response to chitin, plant-type cell wall biogenesis, xyloglucan metabolic process, cellular polysaccharide metabolic process, cellular glucan metabolic process, glucan metabolic process, cell wall polysaccharide metabolic process, cell wall macromolecule metabolic process, hemicellulose metabolic process, cell wall organization, plant-type cell wall organization, external en…	GO:0016758, GO:0016762, GO:0046527, GO:0016759, GO:0030247, GO:0016798, GO:0005342, GO:0046943, GO:0004553, GO:0015297, GO:0015171, GO:0016760, GO:0008194	hexosyltransferase activity, xyloglucan:xyloglucosyl transferase activity, glucosyltransferase activity, cellulose synthase activity, polysaccharide binding, hydrolase activity, acting on glycosyl bonds, organic acid transmembrane transporter activity, carboxylic acid transmembrane transporter activity, hydrolase activity, hydrolyzing O-glycosyl compounds, antiporter activity, amino acid transmem…	GO:0098791, GO:0005802, GO:0031985, GO:0005795, GO:0099503, GO:0000138, GO:0005788, GO:0005768, GO:0030867, GO:0005791, GO:0098827, GO:0005789, GO:0042175	Golgi apparatus subcompartment, trans-Golgi network, Golgi cisterna, Golgi stack, secretory vesicle, Golgi trans cisterna, endoplasmic reticulum lumen, endosome, rough endoplasmic reticulum membrane, rough endoplasmic reticulum, endoplasmic reticulum subcompartment, endoplasmic reticulum membrane, nuclear outer membrane-endoplasmic reticulum membrane network	1811	3227	0.4642	0.4129	0.02018	0.06714	-0.04006	-0.0348
20	Seed coat	ii2	20. ii2 general (DELTAVPE and STK)	20. ii2 gen	4	1836	AT4G21640, AT2G02000, AT3G23560, AT1G54940, AT3G13890, AT2G45400, AT1G11990, AT1G14970, AT2G30360, AT2G16980, AT2G19800, AT1G30220, AT5G25110, AT1G72140, AT3G29630	NA, GAD3, ALF5, GUX4,PGSIP4, ATMYB26,MS35,MYB26, BEN1, NA, NA, CIPK11,PKS5,SIP4,SNRK3.22, NA, MIOX2, ATINT2,INT2, CIPK25,SnRK3.25, NPF5.12,TOB1, NA	G1	0.567	GO:0010200, GO:0042546, GO:0009751, GO:0036293, GO:0070482, GO:0044036, GO:0071215, GO:0097306, GO:0001666, GO:0034637, GO:0044264, GO:0016051, GO:0010073, GO:0033692, GO:0010383	response to chitin, cell wall biogenesis, response to salicylic acid, response to decreased oxygen levels, response to oxygen levels, cell wall macromolecule metabolic process, cellular response to abscisic acid stimulus, cellular response to alcohol, response to hypoxia, cellular carbohydrate biosynthetic process, cellular polysaccharide metabolic process, carbohydrate biosynthetic process, meri…	GO:0015144, GO:0016758, GO:0008194, GO:0019900, GO:0060089, GO:0051119	carbohydrate transmembrane transporter activity, hexosyltransferase activity, UDP-glycosyltransferase activity, kinase binding, molecular transducer activity, sugar transmembrane transporter activity	NA	NA	1385	2245	0.4747	0.43	0.02253	0.1167	-0.01615	-0.03538
21	Seed coat	oi1	21. oi1 flavinol synthesizing (MYB11)	21. oi1 flav synth	2, 0, 13, 18	5332	AT3G62610, AT2G13810, AT1G16750, AT4G38650, AT1G69520, AT3G21500, AT2G34170, AT4G27240, AT2G47460, AT1G10640, AT3G61950, AT2G02780, AT1G24070, AT4G32500, AT1G58602	ATMYB11,MYB11,PFG2, ALD1,AtALD1,EDTS5, NA, NA, NA, DXL1,DXPS1,DXS2, DEG21, NA, ATMYB12,MYB12,PFG1, NA, MYC67, NA, ATCSLA10,CSLA10, AKT5,KT5, RPP7	G1	0.5514	GO:0009812, GO:0009813, GO:0051321, GO:1901615, GO:0042546, GO:0000910, GO:0009411, GO:0051553, GO:0051555, GO:1903046, GO:0051552, GO:0051554, GO:0046148, GO:1901617	flavonoid metabolic process, flavonoid biosynthetic process, meiotic cell cycle, organic hydroxy compound metabolic process, cell wall biogenesis, cytokinesis, response to UV, flavone biosynthetic process, flavonol biosynthetic process, meiotic cell cycle process, flavone metabolic process, flavonol metabolic process, pigment biosynthetic process, organic hydroxy compound biosynthetic process	GO:0015144, GO:0019199, GO:0004888, GO:0051119, GO:0008017, GO:0004714, GO:0008092, GO:0038023, GO:0015631, GO:0060089, GO:0004190, GO:0070001, GO:0000155, GO:0004713, GO:0004673, GO:0016775, GO:0140299	carbohydrate transmembrane transporter activity, transmembrane receptor protein kinase activity, transmembrane signaling receptor activity, sugar transmembrane transporter activity, microtubule binding, transmembrane receptor protein tyrosine kinase activity, cytoskeletal protein binding, signaling receptor activity, tubulin binding, molecular transducer activity, aspartic-type endopeptidase acti…	GO:0005874, GO:0099081, GO:0099512, GO:0099513	microtubule, supramolecular polymer, supramolecular fiber, polymeric cytoskeletal fiber	1134	1720	0.4956	0.5107	0.0168	0.1193	-0.01695	0.002515
22	Seed coat	oi1	22. oi1 flavinol synthesizing high PCD (MYB11, SCOOP15, BAP1)	22. oi1 flav synth high PCD	1	1867	AT3G61190, AT5G61600, AT5G08760, AT2G47730, AT2G05940, AT1G32920, AT1G70210, AT5G64870, AT2G23810, AT2G34070, AT2G38170, AT3G46620, AT3G52800, AT3G51860, AT5G39220	BAP1, ERF104, STMP8, ATGSTF5,ATGSTF8,GST6,GSTF8, PBL14,RIPK, NA, ATCYCD1;1,CYCD1;1, FLOT3, TET8, TBL37, ATCAX1,CAX1,RCI4, AtRDUF1,BTL10,RDUF1, NA, ATCAX3,ATHCX1,CAX1-LIKE,CAX3, NA	G1	0.6063	GO:0071456, GO:0036294, GO:0071453, GO:0001666, GO:0036293, GO:0070482, GO:0010200, GO:0009751, GO:0009409, GO:0009723, GO:0071446, GO:0009813, GO:0071407, GO:0009812, GO:0009863	cellular response to hypoxia, cellular response to decreased oxygen levels, cellular response to oxygen levels, response to hypoxia, response to decreased oxygen levels, response to oxygen levels, response to chitin, response to salicylic acid, response to cold, response to ethylene, cellular response to salicylic acid stimulus, flavonoid biosynthetic process, cellular response to organic cyclic …	GO:0016758, GO:0004713, GO:0015085, GO:0019199, GO:0015103, GO:0005262, GO:0004714, GO:0008509, GO:0015556, GO:0015291	hexosyltransferase activity, protein tyrosine kinase activity, calcium ion transmembrane transporter activity, transmembrane receptor protein kinase activity, inorganic anion transmembrane transporter activity, calcium channel activity, transmembrane receptor protein tyrosine kinase activity, anion transmembrane transporter activity, C4-dicarboxylate transmembrane transporter activity, secondary …	NA	NA	1327	2129	0.4089	0.4904	0.02288	0.08527	-0.01888	-0.03478
23	Seed coat	oi1	23. oi1 flavinol synthesizing S-phase (MYB11 and BARD1)	23. oi1 flav synth s-phase	12	750	AT5G65350, AT2G01905, AT5G59870, AT1G14900, AT3G20670, AT4G27230, AT5G63550, AT2G46980, AT4G26630, AT1G67180, AT1G51060, AT5G22880, AT1G07820, AT1G04020, AT5G38690	HTR11, CYCJ18, h2a.w.6,HTA6, HMGA, HTA13, HTA2, NA, ASY3,AtASY3, DEK3, NA, HTA10, H2B,HTB2, NA, ATBARD1,BARD1,ROW1, DDR1	S	0.832	GO:0051276, GO:0007059, GO:0006310, GO:0000280, GO:0098813, GO:0006974, GO:0000278, GO:0006281, GO:0048285, GO:0051321, GO:1903047, GO:1903046, GO:0000819, GO:0006302, GO:0006260	chromosome organization, chromosome segregation, DNA recombination, nuclear division, nuclear chromosome segregation, cellular response to DNA damage stimulus, mitotic cell cycle, DNA repair, organelle fission, meiotic cell cycle, mitotic cell cycle process, meiotic cell cycle process, sister chromatid segregation, double-strand break repair, DNA replication	GO:0030527, GO:0003682, GO:0046982, GO:0005198, GO:0140097, GO:0042393, GO:0016887, GO:0008017, GO:0003697, GO:0003777, GO:0031491, GO:0015631, GO:0008094, GO:0003774, GO:0008327	structural constituent of chromatin, chromatin binding, protein heterodimerization activity, structural molecule activity, catalytic activity, acting on DNA, histone binding, ATP hydrolysis activity, microtubule binding, single-stranded DNA binding, microtubule motor activity, nucleosome binding, tubulin binding, ATP-dependent activity, acting on DNA, cytoskeletal motor activity, methyl-CpG bindi…	GO:0005694, GO:0044815, GO:0000793, GO:0032993, GO:0000785, GO:0098687, GO:0000775, GO:0000228, GO:0000786, GO:0015630, GO:0000779, GO:0035861, GO:0090734, GO:0043596, GO:0005856	chromosome, DNA packaging complex, condensed chromosome, protein-DNA complex, chromatin, chromosomal region, chromosome, centromeric region, nuclear chromosome, nucleosome, microtubule cytoskeleton, condensed chromosome, centromeric region, site of double-strand break, site of DNA damage, nuclear replication fork, cytoskeleton	1215	1884	0.5138	0.554	0.02337	0.3645	-0.01987	0.2765
24	Seed coat	oi1	24. oi micropylar (SWEET12)	24. oi micr	14	652	AT5G28145, AT4G16990, AT5G23660, AT5G46200, AT1G73220, AT5G62070, AT5G63180, AT2G46450, AT3G23430, AT1G14860, AT2G33750, AT3G05390, AT4G13540, AT3G30180, AT4G36380	NA, RLM3,TN16, AtSWEET12,MTN3,SWEET12, NA, AtOCT1,OCT1, IQD23, NA, ATCNGC12,CNGC12, ATPHO1,PHO1, atnudt18,NUDT18, ATPUP2,PUP2, NA, ADR, BR6OX2,CYP85A2, ROT3	G1	0.6549	GO:0048438, GO:0048437, GO:0048467, GO:0009624, GO:0048440, GO:0010268, GO:0098660, GO:1990748, GO:0098869, GO:0097237, GO:0031667, GO:0016128, GO:0016131, GO:0031669, GO:0048481	floral whorl development, floral organ development, gynoecium development, response to nematode, carpel development, brassinosteroid homeostasis, inorganic ion transmembrane transport, cellular detoxification, cellular oxidant detoxification, cellular response to toxic substance, response to nutrient levels, phytosteroid metabolic process, brassinosteroid metabolic process, cellular response to n…	GO:0051119, GO:0015144, GO:0035673, GO:0016705, GO:1904680, GO:0004497, GO:0030570, GO:0004860, GO:0005385, GO:0015112, GO:0019210, GO:0016837, GO:0042887, GO:0016798, GO:0042937	sugar transmembrane transporter activity, carbohydrate transmembrane transporter activity, oligopeptide transmembrane transporter activity, oxidoreductase activity, acting on paired donors, with incorporation or reduction of molecular oxygen, peptide transmembrane transporter activity, monooxygenase activity, pectate lyase activity, protein kinase inhibitor activity, zinc ion transmembrane transp…	NA	NA	1302	2098	0.56	0.4935	0.04067	0.07682	-0.02105	-0.04842
25	Seed coat	oi2	25. oi2 general (GLABRA2)	25. oi2 gen I	3	1836	AT5G58782, AT3G20395, AT4G39940, AT4G19380, AT1G23420, AT5G16560, AT3G61230, AT1G02190, AT4G08910, AT1G04247, AT1G25450, AT4G32170, AT3G48460, AT1G52470, AT1G04220	AtcPT6,cPT6, ATL92, AKN2,APK2, NA, INO, KAN,KAN1, AtPLIM2c,PLIM2c, CER1-L1, NA, NA, CER60,KCS5, CYP96A2, SFAR4, NA, DAISY,KCS2	G1	0.5861	GO:0072330, GO:0010143, GO:0009695, GO:0010214, GO:0009694, GO:0008544, GO:0009913, GO:0030855, GO:0048437, GO:0000038, GO:0060429, GO:0042335, GO:0048438, GO:0042761, GO:0055081	monocarboxylic acid biosynthetic process, cutin biosynthetic process, jasmonic acid biosynthetic process, seed coat development, jasmonic acid metabolic process, epidermis development, epidermal cell differentiation, epithelial cell differentiation, floral organ development, very long-chain fatty acid metabolic process, epithelium development, cuticle development, floral whorl development, very l…	GO:0140359, GO:0102756, GO:0008092, GO:0032029, GO:0032036, GO:0080115, GO:0016701	ABC-type transporter activity, very-long-chain 3-ketoacyl-CoA synthase activity, cytoskeletal protein binding, myosin tail binding, myosin heavy chain binding, myosin XI tail binding, oxidoreductase activity, acting on single donors with incorporation of molecular oxygen	GO:0010168	ER body	1508	2438	0.4178	0.4104	0.01611	0.1024	-0.01215	-0.05311
26	Seed coat	oi2	26. oi2 very long chain fatty acid-synthesizing (KCS6 and WRI4)	26. oi2 VLCFA synth	9	893	AT4G25850, AT1G75880, AT1G51440, AT1G68530, AT5G59320, AT5G45670, AT5G57685, AT4G20320, AT2G38540, AT1G55260, AT1G79700, AT5G45920, AT2G03530, AT3G23450, AT1G04220	ORP4B, NA, DALL2, AtCER6,AtCUT1,CER6,CUT1,G2,KCS6,POP1, LTP3, NA, ATGDU3,GDU3,LSB1, CTPS4, ATLTP1,AtLtpI-4,LP1,LTP1, LTPG6, WRI4, NA, ATUPS2,UPS2, KRATOS, DAISY,KCS2	G1	0.5834	GO:0010143, GO:0010025, GO:0010166, GO:0072330, GO:1901570, GO:0006631, GO:0006633, GO:1901568, GO:0042335, GO:0048437, GO:0000038, GO:0048481, GO:0008544, GO:0009913, GO:0030855, GO:0042761, GO:0035670	cutin biosynthetic process, wax biosynthetic process, wax metabolic process, monocarboxylic acid biosynthetic process, fatty acid derivative biosynthetic process, fatty acid metabolic process, fatty acid biosynthetic process, fatty acid derivative metabolic process, cuticle development, floral organ development, very long-chain fatty acid metabolic process, plant ovule development, epidermis deve…	GO:0102756, GO:0015205, GO:0140359, GO:0000981, GO:0009922, GO:0005319, GO:0005345, GO:0015112, GO:0015248, GO:0016746, GO:0008289, GO:0005337, GO:0015562, GO:0015103, GO:0042626	very-long-chain 3-ketoacyl-CoA synthase activity, nucleobase transmembrane transporter activity, ABC-type transporter activity, DNA-binding transcription factor activity, RNA polymerase II-specific, fatty acid elongase activity, lipid transporter activity, purine nucleobase transmembrane transporter activity, nitrate transmembrane transporter activity, sterol transporter activity, acyltransferase…	NA	NA	1094	1625	0.5136	0.4787	0.01914	0.09736	-0.01285	-0.04476
27	Seed coat	oi2	27. oi2 general (GLABRA2 and WRKY40)	27. oi2 gen II	16	580	AT1G80840, AT1G72520, AT3G25780, AT5G13700, AT4G34410, AT1G66400, AT2G27080, AT4G27520, AT5G01750, AT1G11670, AT4G29780, AT5G62470, AT1G53840, AT1G17420, AT1G73010	ATWRKY40,WRKY40, ATLOX4,LOX4, AOC3, APAO,ATPAO1,PAO1, ERF109,RRTF1, CML23, NHL13, AtENODL2,ENODL2, NA, NA, NA, ATMYB96,MYB96,MYBCOV1, ATPME1,PME1, ATLOX3,LOX3, AtPPsPase1,ATPS2,PPsPase1,PS2	G1	0.5741	GO:0010200, GO:0071456, GO:0036294, GO:0071453, GO:0001666, GO:0036293, GO:0070482, GO:0009751, GO:0009867, GO:0071395, GO:0071398, GO:0072330, GO:0009409, GO:0071407, GO:0009723	response to chitin, cellular response to hypoxia, cellular response to decreased oxygen levels, cellular response to oxygen levels, response to hypoxia, response to decreased oxygen levels, response to oxygen levels, response to salicylic acid, jasmonic acid mediated signaling pathway, cellular response to jasmonic acid stimulus, cellular response to fatty acid, monocarboxylic acid biosynthetic p…	GO:0102756, GO:0004553, GO:0140359, GO:0016701, GO:0016702, GO:0015926	very-long-chain 3-ketoacyl-CoA synthase activity, hydrolase activity, hydrolyzing O-glycosyl compounds, ABC-type transporter activity, oxidoreductase activity, acting on single donors with incorporation of molecular oxygen, oxidoreductase activity, acting on single donors with incorporation of molecular oxygen, incorporation of two atoms of oxygen, glucosidase activity	GO:0010168	ER body	1667	2867	0.345	0.4015	0.02355	0.104	-0.014	-0.04248
28	Seed coat	oi2	28. oi2 S-phase (GLABRA2 and BARD1)	28. oi2 s-phase	20	425	AT4G19380, AT1G02190, AT3G23740, AT1G65470, AT1G04020, AT1G14350, AT5G23420, AT4G00020, AT1G23420, AT1G52470, AT3G53680, AT4G32170, AT1G11670, AT5G45670, AT1G25450	NA, CER1-L1, NA, FAS1,FUGU2,NFB2, ATBARD1,BARD1,ROW1, AtMYB124,FLP,MYB124, HMGB6, BRCA2(IV),BRCA2A,EDA20,MEE43, INO, NA, NA, CYP96A2, NA, NA, CER60,KCS5	S	0.8706	GO:0006974, GO:0006281, GO:0006260, GO:0006310, GO:0006261, GO:0000724, GO:0006302, GO:0000725, GO:0051276, GO:0051321, GO:1903046, GO:0006270, GO:0000278, GO:0000280, GO:0007059	cellular response to DNA damage stimulus, DNA repair, DNA replication, DNA recombination, DNA-templated DNA replication, double-strand break repair via homologous recombination, double-strand break repair, recombinational repair, chromosome organization, meiotic cell cycle, meiotic cell cycle process, DNA replication initiation, mitotic cell cycle, nuclear division, chromosome segregation	GO:0030527, GO:0140097, GO:0003682, GO:0008094, GO:0003697, GO:0003688, GO:0003678, GO:0017116, GO:0046982, GO:0030983, GO:0043138, GO:0003684, GO:0004386, GO:0042393, GO:0003777	structural constituent of chromatin, catalytic activity, acting on DNA, chromatin binding, ATP-dependent activity, acting on DNA, single-stranded DNA binding, DNA replication origin binding, DNA helicase activity, single-stranded DNA helicase activity, protein heterodimerization activity, mismatched DNA binding, 3'-5' DNA helicase activity, damaged DNA binding, helicase activity, histone binding,…	GO:0005694, GO:0000228, GO:0000793, GO:0005657, GO:0043596, GO:0032993, GO:0044815, GO:0000785, GO:0030894, GO:0043601, GO:0035861, GO:0090734, GO:0098687, GO:0042575, GO:0000794	chromosome, nuclear chromosome, condensed chromosome, replication fork, nuclear replication fork, protein-DNA complex, DNA packaging complex, chromatin, replisome, nuclear replisome, site of double-strand break, site of DNA damage, chromosomal region, DNA polymerase complex, condensed nuclear chromosome	1740	2953	0.4116	0.4608	0.02811	0.5314	-0.01488	0.4472

## Sheet: 5 DAP
Supplementary Table 3. Level 3 cluster quality controls and metadata
level_3_plotting	level_1_annotation	level_2_annotation	level_3_annotation_full	level_3_annotation_abbr	original_clusters_res_1.2	n_cells	top_markers_locus_IDs	top_markers_symbols	primary_cc_phase	primary_cc_phase_prop	top_BP_GO_ID	top_BP_GO_Description	top_MF_GO_ID	top_MF_GO_Description	top_CC_GO_ID	top_CC_GO_Description	mean_nFeature_RNA	mean_nCount_RNA	mean_percent_mito	mean_percent_chlor	mean_doublet_score	mean_percent_cc	mean_G2M_Score	mean_S_Score
1	Embryo	EMB	1. EMB (PDF1)	1. EMB	14	414	AT3G21090, AT5G22810, AT4G00180, AT5G01075, AT1G06080, AT5G08460, AT2G42840, AT5G57390, AT1G32240, AT5G07180, AT1G04660, AT1G71691, AT2G45190, AT3G24250, AT4G37750	ABCG15, NA, YAB3, TWS1, ADS1,AtADS1, NA, PDF1, AIL5,CHO1,EMK,PLT5, KAN2, ERL2, NA, NA, AFO,FIL,YAB1, NA, ANT,AtANT,CKC,CKC1,DRG	S	0.4155	GO:0042254, GO:0022613, GO:0042273, GO:0007389, GO:0002181, GO:0042255, GO:0003002, GO:0022618, GO:0071826, GO:0009955, GO:0006364, GO:0016072, GO:0000470, GO:0000028, GO:0065001	ribosome biogenesis, ribonucleoprotein complex biogenesis, ribosomal large subunit biogenesis, pattern specification process, cytoplasmic translation, ribosome assembly, regionalization, ribonucleoprotein complex assembly, ribonucleoprotein complex subunit organization, adaxial/abaxial pattern specification, rRNA processing, rRNA metabolic process, maturation of LSU-rRNA, ribosomal small subunit …	GO:0003735, GO:0005198, GO:0019843, GO:0005507, GO:0030527, GO:0070181, GO:0042802, GO:0070180, GO:0003746, GO:0030515, GO:0043021, GO:0016879, GO:0016168, GO:0003727, GO:0008266, GO:0051082, GO:0042803	structural constituent of ribosome, structural molecule activity, rRNA binding, copper ion binding, structural constituent of chromatin, small ribosomal subunit rRNA binding, identical protein binding, large ribosomal subunit rRNA binding, translation elongation factor activity, snoRNA binding, ribonucleoprotein complex binding, ligase activity, forming carbon-nitrogen bonds, chlorophyll binding,…	GO:0005840, GO:0044391, GO:0022626, GO:0022625, GO:0015934, GO:0015935, GO:0022627, GO:0000313, GO:0009547, GO:0005732, GO:0009534, GO:0030684, GO:0031976, GO:0098798, GO:0055035	ribosome, ribosomal subunit, cytosolic ribosome, cytosolic large ribosomal subunit, large ribosomal subunit, small ribosomal subunit, cytosolic small ribosomal subunit, organellar ribosome, plastid ribosome, sno(s)RNA-containing ribonucleoprotein complex, chloroplast thylakoid, preribosome, plastid thylakoid, mitochondrial protein-containing complex, plastid thylakoid membrane	1109	1667	0.9813	1.579	0.009825	0.501	0.004068	0.04708
2	Endosperm	CZE	2. CZE nodule-like (MEA)	2. CZE nod-like	17, 7, 6	220	AT4G25040, AT5G36903, AT3G24790, AT1G29010, AT2G25120, AT3G60140, AT1G10745, AT1G69190, AT1G28630, AT1G02580, AT3G59790, AT1G42980, AT2G23970, AT5G25950, AT2G32550	CASPL1F1, NA, PBL25, TIE3, NA, BGLU30,DIN2,SRG2, ESF1.2, NA, NA, EMB173,FIS1,MEA,SDG5, ATMPK10,MPK10, NA, NA, NA, NOT9c	S	0.5091	GO:0022613, GO:0042254, GO:0016072, GO:0006364, GO:0034470, GO:0006974, GO:0006281, GO:0006260, GO:0051276, GO:0006261, GO:0006310, GO:0006270, GO:0000725, GO:0000724, GO:0006302	ribonucleoprotein complex biogenesis, ribosome biogenesis, rRNA metabolic process, rRNA processing, ncRNA processing, cellular response to DNA damage stimulus, DNA repair, DNA replication, chromosome organization, DNA-templated DNA replication, DNA recombination, DNA replication initiation, recombinational repair, double-strand break repair via homologous recombination, double-strand break repair	GO:0004386, GO:0140097, GO:0003697, GO:0008094, GO:0003724, GO:0008186, GO:0003678, GO:0017111, GO:0030515, GO:0016887, GO:0003688, GO:0030983, GO:0017116, GO:0003682, GO:0043138	helicase activity, catalytic activity, acting on DNA, single-stranded DNA binding, ATP-dependent activity, acting on DNA, RNA helicase activity, ATP-dependent activity, acting on RNA, DNA helicase activity, ribonucleoside triphosphate phosphatase activity, snoRNA binding, ATP hydrolysis activity, DNA replication origin binding, mismatched DNA binding, single-stranded DNA helicase activity, chroma…	GO:0005694, GO:0030684, GO:0000228, GO:0032040, GO:0034357, GO:0042651, GO:0009534, GO:0055035, GO:0031976, GO:0009535, GO:0030686, GO:0000793, GO:0042170, GO:0043596, GO:0009521	chromosome, preribosome, nuclear chromosome, small-subunit processome, photosynthetic membrane, thylakoid membrane, chloroplast thylakoid, plastid thylakoid membrane, plastid thylakoid, chloroplast thylakoid membrane, 90S preribosome, condensed chromosome, plastid membrane, nuclear replication fork, photosystem	1699	2677	0.5898	0.8076	0.009984	0.6713	0.02937	0.1527
3	Endosperm	CZE	3. CZE apical cyst (MEE56)	3. CZE apical cyst	21	177	AT1G56390, AT4G20160, AT1G20690, AT2G24950, AT3G09375, AT2G27070, AT1G31530, AT5G01795, AT3G21170, AT1G27240, AT3G43290, AT4G10507, AT2G26320, AT3G30844, AT4G21690	NA, NA, NA, NA, NA, ARR13,RR13, CCR4g, NA, NA, NA, NA, NA, AGL33, NA, ATGA3OX3,GA3OX3	G1	0.5706	GO:0010498, GO:0043161, GO:0070646, GO:0009894, GO:0006974, GO:0070647, GO:0042176, GO:0016579, GO:0006281, GO:1903050, GO:0061136, GO:0030162, GO:0031329, GO:0009896, GO:0031331	proteasomal protein catabolic process, proteasome-mediated ubiquitin-dependent protein catabolic process, protein modification by small protein removal, regulation of catabolic process, cellular response to DNA damage stimulus, protein modification by small protein conjugation or removal, regulation of protein catabolic process, protein deubiquitination, DNA repair, regulation of proteolysis invo…	GO:0019787, GO:0004842, GO:0061630, GO:0061659, GO:0019783, GO:0004843, GO:0101005, GO:0044390, GO:0031624, GO:0003713, GO:0003712, GO:0140097, GO:0017111, GO:0016887, GO:0045182	ubiquitin-like protein transferase activity, ubiquitin-protein transferase activity, ubiquitin protein ligase activity, ubiquitin-like protein ligase activity, ubiquitin-like protein peptidase activity, cysteine-type deubiquitinase activity, deubiquitinase activity, ubiquitin-like protein conjugating enzyme binding, ubiquitin conjugating enzyme binding, transcription coactivator activity, transcr…	GO:0005667, GO:0000502, GO:1905368, GO:0000151, GO:1905369, GO:0019773, GO:0005839, GO:0090575, GO:0005694, GO:0000793, GO:0008180, GO:0005654, GO:0008540, GO:0000228, GO:0005838, GO:0022624, GO:0000932	transcription regulator complex, proteasome complex, peptidase complex, ubiquitin ligase complex, endopeptidase complex, proteasome core complex, alpha-subunit complex, proteasome core complex, RNA polymerase II transcription regulator complex, chromosome, condensed chromosome, COP9 signalosome, nucleoplasm, proteasome regulatory particle, base subcomplex, nuclear chromosome, proteasome regulator…	1803	3419	0.4547	0.5225	0.00971	0.1843	-0.07841	-0.004967
4	Endosperm	CZE	4. CZE basal cyst (RALFL3)	4. CZE basal cyst	4	68	AT2G19796, AT2G01667, AT2G19802, AT2G02147, AT2G19970, AT5G38195, AT2G17723, AT2G15325, AT3G48231, AT3G29152, AT1G43667, AT1G26797, AT3G49307, AT5G63230, AT1G53285	NA, NA, NA, LCR73, NA, NA, NA, NA, LCR48, NA, NA, NA, NA, NA, NA	G1	0.5441	GO:0006869, GO:0010876, GO:0043086, GO:0044092, GO:0006878, GO:0031146	lipid transport, lipid localization, negative regulation of catalytic activity, negative regulation of molecular function, cellular copper ion homeostasis, SCF-dependent proteasomal ubiquitin-dependent protein catabolic process	GO:0097602, GO:0046910, GO:0004857	cullin family protein binding, pectinesterase inhibitor activity, enzyme inhibitor activity	NA	NA	905.8	1370	1.272	1.177	0.03105	0.399	-0.00349	-0.0353
5	Endosperm	CZE	5. CZE nodule (CYCD4;2)	5. CZE nodule	17, 21	174	AT3G56560, AT1G75610, AT1G32010, AT2G14695, AT5G46820, AT1G17000, AT4G20200, AT5G47175, AT2G23900, AT1G60985, AT4G30067, AT2G01240, AT3G03260, AT3G03910, AT1G32000	anac065,NAC065, NA, NA, NA, NA, ATTPS3,TPS3, NA, LCR3, NA, SCRL6, LCR63, NA, HDG8, GDH3, NA	S	0.4713	GO:0010498, GO:0043161, GO:0006974, GO:0006281, GO:0070646, GO:0070647, GO:0006310, GO:0061982, GO:0009408, GO:0007127, GO:0007131, GO:0140527, GO:0000338, GO:0006413, GO:0035825	proteasomal protein catabolic process, proteasome-mediated ubiquitin-dependent protein catabolic process, cellular response to DNA damage stimulus, DNA repair, protein modification by small protein removal, protein modification by small protein conjugation or removal, DNA recombination, meiosis I cell cycle process, response to heat, meiosis I, reciprocal meiotic recombination, reciprocal homolog…	GO:0004842, GO:0019787, GO:0061630, GO:0061659, GO:0036402, GO:0017111, GO:0016887, GO:0140097, GO:0044390, GO:0031624, GO:0003688, GO:0019783, GO:0101005, GO:0008094, GO:0045182	ubiquitin-protein transferase activity, ubiquitin-like protein transferase activity, ubiquitin protein ligase activity, ubiquitin-like protein ligase activity, proteasome-activating activity, ribonucleoside triphosphate phosphatase activity, ATP hydrolysis activity, catalytic activity, acting on DNA, ubiquitin-like protein conjugating enzyme binding, ubiquitin conjugating enzyme binding, DNA repl…	GO:0000502, GO:1905369, GO:1905368, GO:0005839, GO:0005838, GO:0022624, GO:0008540, GO:0019774, GO:0019773, GO:0008180, GO:0005667, GO:0000151, GO:0000793, GO:0005694, GO:0090575	proteasome complex, endopeptidase complex, peptidase complex, proteasome core complex, proteasome regulatory particle, proteasome accessory complex, proteasome regulatory particle, base subcomplex, proteasome core complex, beta-subunit complex, proteasome core complex, alpha-subunit complex, COP9 signalosome, transcription regulator complex, ubiquitin ligase complex, condensed chromosome, chromos…	1943	3585	0.5673	0.557	0.00536	0.357	-0.03047	0.02061
6	Endosperm	MCE	6. MCE (ALE1)	6. MCE	13	494	AT4G31710, AT1G23510, AT1G10880, AT2G23230, AT1G28700, AT3G46240, AT5G36150, AT2G45830, AT1G71120, AT2G30680, AT5G56410, AT3G45130, AT2G34510, AT3G58740, AT1G62340	ATGLR2.4,GLR2.4, NA, NA, NA, NA, NA, ATPEN3,PEN3, DTA2, GLIP6, NA, NA, LAS1, AthB-1, CSY1, ALE,ALE1	S	0.3765	GO:0051321, GO:1903046, GO:0048609, GO:0032504, GO:0006270, GO:0006260, GO:0048232, GO:0007276, GO:0022412, GO:0006974, GO:0010262, GO:0006261, GO:0007140, GO:0009225, GO:0001666	meiotic cell cycle, meiotic cell cycle process, multicellular organismal reproductive process, multicellular organism reproduction, DNA replication initiation, DNA replication, male gamete generation, gamete generation, cellular process involved in reproduction in multicellular organism, cellular response to DNA damage stimulus, somatic embryogenesis, DNA-templated DNA replication, male meiotic n…	GO:0140097, GO:0017116, GO:0008092, GO:0015631, GO:0008017, GO:0008094, GO:0003697, GO:0003678	catalytic activity, acting on DNA, single-stranded DNA helicase activity, cytoskeletal protein binding, tubulin binding, microtubule binding, ATP-dependent activity, acting on DNA, single-stranded DNA binding, DNA helicase activity	GO:0005694, GO:0005856, GO:0099081, GO:0099512, GO:0099513, GO:0005874, GO:0015630, GO:0005881, GO:0043596, GO:0031519, GO:0000228, GO:0042575, GO:0055028, GO:0030981, GO:0000785, GO:0099080, GO:0005657	chromosome, cytoskeleton, supramolecular polymer, supramolecular fiber, polymeric cytoskeletal fiber, microtubule, microtubule cytoskeleton, cytoplasmic microtubule, nuclear replication fork, PcG protein complex, nuclear chromosome, DNA polymerase complex, cortical microtubule, cortical microtubule cytoskeleton, chromatin, supramolecular complex, replication fork	1586	2703	0.4744	0.699	0.02708	0.5602	-0.001936	0.03191
7	Endosperm	PEN	7. PEN general I (IMK2)	7. PEN gen I	1	1389	AT3G59765, AT1G63100, AT5G07160, AT2G04215, AT3G51740, AT1G04425, AT5G50740, AT2G42110, AT4G35730, AT5G65470, AT2G33400, AT2G34190, AT1G30690, AT3G52110, AT3G25980	NA, SCL28, NA, NA, IMK2, NA, AtHMP52, NA, ISTL3, NA, NA, NA, PATL4, NA, AtMAD2,MAD2	G2M	0.6638	GO:0015979, GO:0019684, GO:0015994, GO:0033013, GO:0006778, GO:0006091, GO:0006270, GO:0006974, GO:0009765, GO:0006261, GO:0006779, GO:0009642, GO:0006260, GO:0009768, GO:0051321	photosynthesis, photosynthesis, light reaction, chlorophyll metabolic process, tetrapyrrole metabolic process, porphyrin-containing compound metabolic process, generation of precursor metabolites and energy, DNA replication initiation, cellular response to DNA damage stimulus, photosynthesis, light harvesting, DNA-templated DNA replication, porphyrin-containing compound biosynthetic process, resp…	GO:0016168, GO:0017116, GO:0003688, GO:0004312, GO:0008094, GO:0004386, GO:0003727, GO:0140097, GO:0003678, GO:0016830, GO:0016747, GO:0030515, GO:0016746, GO:0008266, GO:0050661, GO:0016779	chlorophyll binding, single-stranded DNA helicase activity, DNA replication origin binding, fatty acid synthase activity, ATP-dependent activity, acting on DNA, helicase activity, single-stranded RNA binding, catalytic activity, acting on DNA, DNA helicase activity, carbon-carbon lyase activity, acyltransferase activity, transferring groups other than amino-acyl groups, snoRNA binding, acyltransf…	GO:0031976, GO:0009534, GO:0034357, GO:0042651, GO:0055035, GO:0009535, GO:0042170, GO:0009521, GO:0031977, GO:0009543, GO:0031978, GO:0009522, GO:0009523, GO:0098807, GO:0010287	plastid thylakoid, chloroplast thylakoid, photosynthetic membrane, thylakoid membrane, plastid thylakoid membrane, chloroplast thylakoid membrane, plastid membrane, photosystem, thylakoid lumen, chloroplast thylakoid lumen, plastid thylakoid lumen, photosystem I, photosystem II, chloroplast thylakoid membrane protein complex, plastoglobule	1566	2490	0.475	0.7933	0.01133	0.8832	0.07899	0.005994
8	Endosperm	PEN	8. PEN G2M-phase (MAD2)	8. PEN g2/m-phase	6	859	AT5G37247, AT5G37240, AT1G06737, AT5G01910, AT1G44940, AT5G05445, AT4G00460, AT5G55520, AT1G07273, AT3G05445, AT5G05425, AT1G34042, AT5G05395, AT1G49952, AT4G11080	NA, NA, NA, NA, NA, NA, ATROPGEF3,ROPGEF3, NA, NA, NA, NA, NA, NA, NA, 3xHMG-box1	G2M	1	GO:0000280, GO:0051321, GO:1903046, GO:0007017, GO:0048285, GO:0000278, GO:1903047, GO:0007059, GO:0098813, GO:0051726, GO:0007010, GO:0007018, GO:0044770, GO:0000226, GO:0140013	nuclear division, meiotic cell cycle, meiotic cell cycle process, microtubule-based process, organelle fission, mitotic cell cycle, mitotic cell cycle process, chromosome segregation, nuclear chromosome segregation, regulation of cell cycle, cytoskeleton organization, microtubule-based movement, cell cycle phase transition, microtubule cytoskeleton organization, meiotic nuclear division	GO:0008017, GO:0015631, GO:0008092, GO:0003774, GO:0003777, GO:0019207, GO:0016538, GO:0019887, GO:0017111, GO:0016168, GO:0140097, GO:0016887, GO:0030332, GO:0003779, GO:0000146	microtubule binding, tubulin binding, cytoskeletal protein binding, cytoskeletal motor activity, microtubule motor activity, kinase regulator activity, cyclin-dependent protein serine/threonine kinase regulator activity, protein kinase regulator activity, ribonucleoside triphosphate phosphatase activity, chlorophyll binding, catalytic activity, acting on DNA, ATP hydrolysis activity, cyclin bindi…	GO:0005856, GO:0015630, GO:0005874, GO:0099081, GO:0099512, GO:0099513, GO:0099080, GO:0009534, GO:0031976, GO:0009535, GO:0055035, GO:0034357, GO:0042651, GO:0009524, GO:0005819	cytoskeleton, microtubule cytoskeleton, microtubule, supramolecular polymer, supramolecular fiber, polymeric cytoskeletal fiber, supramolecular complex, chloroplast thylakoid, plastid thylakoid, chloroplast thylakoid membrane, plastid thylakoid membrane, photosynthetic membrane, thylakoid membrane, phragmoplast, spindle	1884	3118	0.4471	0.7464	0.0179	3.785	0.8654	-0.08424
9	Endosperm	PEN	9. PEN general II (NAC075)	9. PEN gen	7	759	AT2G22660, AT4G29230, AT2G32990, AT1G33055, AT1G55810, AT3G42670, AT5G07200, AT3G54320, AT5G08000, AT4G10640, AT4G27450, AT2G30590, AT1G11070, AT5G49730, AT1G78760	AtGRDP1, anac075,NAC075,SND4, AtGH9B8,GH9B8, HUP32, UCK3,UKL3, CHR38,CLSY,CLSY1, ATGA20OX3,GA20OX3,YAP169, ASML1,ATWRI1,WRI,WRI1, E13L3,PDCB2, ABS6,IQD16, HUP54, WRKY21, NA, ATFRO6,FRO6, NA	G1	0.5112	GO:0015979, GO:0006091, GO:0019684, GO:0072330, GO:0006633, GO:0006631, GO:0015994, GO:0019318, GO:0009768, GO:0006090, GO:0034285, GO:0001666, GO:0036293, GO:0070482, GO:0071456, GO:0006006, GO:0036294, GO:0071453, GO:0006974, GO:0009744	photosynthesis, generation of precursor metabolites and energy, photosynthesis, light reaction, monocarboxylic acid biosynthetic process, fatty acid biosynthetic process, fatty acid metabolic process, chlorophyll metabolic process, hexose metabolic process, photosynthesis, light harvesting in photosystem I, pyruvate metabolic process, response to disaccharide, response to hypoxia, response to dec…	GO:0004312, GO:0017116, GO:0016168, GO:0008094, GO:0003678, GO:0140097, GO:0016903, GO:0000036, GO:0044620, GO:0051192, GO:0140414, GO:0016624, GO:0060089, GO:0003727, GO:0016779	fatty acid synthase activity, single-stranded DNA helicase activity, chlorophyll binding, ATP-dependent activity, acting on DNA, DNA helicase activity, catalytic activity, acting on DNA, oxidoreductase activity, acting on the aldehyde or oxo group of donors, acyl carrier activity, ACP phosphopantetheine attachment site binding, prosthetic group binding, phosphopantetheine-dependent carrier activi…	GO:0009534, GO:0031976, GO:0034357, GO:0042651, GO:0009535, GO:0042170, GO:0055035, GO:0009521, GO:0098807, GO:0009523, GO:0009522, GO:0010287, GO:0031977, GO:0009543, GO:0005811, GO:0031978	chloroplast thylakoid, plastid thylakoid, photosynthetic membrane, thylakoid membrane, chloroplast thylakoid membrane, plastid membrane, plastid thylakoid membrane, photosystem, chloroplast thylakoid membrane protein complex, photosystem II, photosystem I, plastoglobule, thylakoid lumen, chloroplast thylakoid lumen, lipid droplet, plastid thylakoid lumen	1162	1723	0.5087	0.8401	0.01318	0.349	-0.06019	0.01051
10	Endosperm	PEN	10. PEN general V (PTR3)	10. PEN gen	9	701	AT5G05180, AT3G19050, AT1G20060, AT1G11070, AT3G54320, AT5G63530, AT4G28790, AT2G36200, AT2G01905, AT1G22590, AT4G02830, AT5G50090, AT2G32370, AT3G27785, AT5G07260	NA, POK2, NA, NA, ASML1,ATWRI1,WRI,WRI1, ATFP3,AtHMP54,FP3, NA, NA, CYCJ18, AGL87, NA, NA, HDG3, ATMYB118,MYB118,PGA37, NA	G1	0.505	GO:0015979, GO:0019684, GO:0015994, GO:0006091, GO:0000280, GO:0007059, GO:0006778, GO:0098813, GO:0033013, GO:1903046, GO:0051276, GO:0048285, GO:0051321, GO:0140013, GO:0009451	photosynthesis, photosynthesis, light reaction, chlorophyll metabolic process, generation of precursor metabolites and energy, nuclear division, chromosome segregation, porphyrin-containing compound metabolic process, nuclear chromosome segregation, tetrapyrrole metabolic process, meiotic cell cycle process, chromosome organization, organelle fission, meiotic cell cycle, meiotic nuclear division,…	GO:0008017, GO:0015631, GO:0008092, GO:0008173, GO:0008649, GO:0140102, GO:0003777, GO:0016168, GO:0003774, GO:0140101, GO:0042910, GO:0016830, GO:0008757, GO:0008170, GO:0140097	microtubule binding, tubulin binding, cytoskeletal protein binding, RNA methyltransferase activity, rRNA methyltransferase activity, catalytic activity, acting on a rRNA, microtubule motor activity, chlorophyll binding, cytoskeletal motor activity, catalytic activity, acting on a tRNA, xenobiotic transmembrane transporter activity, carbon-carbon lyase activity, S-adenosylmethionine-dependent meth…	GO:0009534, GO:0031976, GO:0042651, GO:0042170, GO:0034357, GO:0009535, GO:0055035, GO:0009521, GO:0031977, GO:0009543, GO:0009523, GO:0031978, GO:0098807, GO:0099081, GO:0099512, GO:0099513	chloroplast thylakoid, plastid thylakoid, thylakoid membrane, plastid membrane, photosynthetic membrane, chloroplast thylakoid membrane, plastid thylakoid membrane, photosystem, thylakoid lumen, chloroplast thylakoid lumen, photosystem II, plastid thylakoid lumen, chloroplast thylakoid membrane protein complex, supramolecular polymer, supramolecular fiber, polymeric cytoskeletal fiber	2041	3261	0.3961	0.7416	0.01895	0.4407	-0.000944	-0.07072
11	Endosperm	PEN	11. PEN S-phase (HMGB6)	11. PEN s-phase	12	592	AT2G42260, AT3G07800, AT3G14740, AT1G71760, AT5G13060, AT4G21070, AT4G16807, AT5G61000, AT5G43530, AT5G43080, AT3G27640, AT1G67180, AT5G63550, AT4G00020, AT5G39550	PYM,UVI4, AtTK1a,TK1,TK1a, NA, NA, ABAP1, ATBRCA1,BRCA1, NA, ATRPA70D,RPA1D,RPA70D, RAD5B, CYCA3;1, NA, NA, NA, BRCA2(IV),BRCA2A,EDA20,MEE43, ORTH1,VIM3	S	0.9307	GO:0006974, GO:0006281, GO:0051276, GO:0006310, GO:0006260, GO:0006302, GO:0006261, GO:0051321, GO:0000725, GO:0000724, GO:1903046, GO:0000280, GO:0007059, GO:0098813, GO:0048285	cellular response to DNA damage stimulus, DNA repair, chromosome organization, DNA recombination, DNA replication, double-strand break repair, DNA-templated DNA replication, meiotic cell cycle, recombinational repair, double-strand break repair via homologous recombination, meiotic cell cycle process, nuclear division, chromosome segregation, nuclear chromosome segregation, organelle fission	GO:0140097, GO:0030527, GO:0003682, GO:0008094, GO:0003697, GO:0003678, GO:0046982, GO:0003688, GO:0004386, GO:0017116, GO:0042393, GO:0043138, GO:0034061, GO:0003887, GO:0003684	catalytic activity, acting on DNA, structural constituent of chromatin, chromatin binding, ATP-dependent activity, acting on DNA, single-stranded DNA binding, DNA helicase activity, protein heterodimerization activity, DNA replication origin binding, helicase activity, single-stranded DNA helicase activity, histone binding, 3'-5' DNA helicase activity, DNA polymerase activity, DNA-directed DNA po…	GO:0005694, GO:0000228, GO:0000793, GO:0005657, GO:0000785, GO:0043596, GO:0044815, GO:0032993, GO:0030894, GO:0043601, GO:0042575, GO:0098687, GO:0009534, GO:0031976, GO:0000794	chromosome, nuclear chromosome, condensed chromosome, replication fork, chromatin, nuclear replication fork, DNA packaging complex, protein-DNA complex, replisome, nuclear replisome, DNA polymerase complex, chromosomal region, chloroplast thylakoid, plastid thylakoid, condensed nuclear chromosome	1717	2778	0.42	0.6618	0.02134	0.8547	-0.06485	0.6438
12	Endosperm	PEN	12. PEN general IV (TGA9)	12. PEN gen	22	226	AT2G34315, AT2G36890, AT2G39700, AT2G33880, AT5G46350, AT2G38870, AT4G31610, AT1G08320, AT5G18310, AT4G31550, AT5G28000, AT5G46880, AT1G13590, AT1G36060, AT4G04605	NA, ATMYB38,BIT1,MYB38,RAX2, ATEXP4,ATEXPA4,ATHEXP,EXPA4,XPA4, HB-3,STIP,WOX9,WOX9A, ATWRKY8,WRKY8, NA, ATREM1,REM1,REM34, bZIP21,TGA9, NA, ATWRKY11,WRKY11, NA, HB-7,HDG5, ATPSK1,PSK1, TG,WIND3, NA	G1	0.5885	GO:0015979, GO:0019684, GO:0015994, GO:0006091, GO:0006778, GO:0033013, GO:0009765, GO:0009768, GO:0006779, GO:0015995, GO:0033014, GO:0009767, GO:0042440, GO:0046148, GO:0006260	photosynthesis, photosynthesis, light reaction, chlorophyll metabolic process, generation of precursor metabolites and energy, porphyrin-containing compound metabolic process, tetrapyrrole metabolic process, photosynthesis, light harvesting, photosynthesis, light harvesting in photosystem I, porphyrin-containing compound biosynthetic process, chlorophyll biosynthetic process, tetrapyrrole biosynt…	GO:0016168, GO:0140097, GO:0043531, GO:0003887, GO:0008266, GO:0008187, GO:0008094, GO:0034061, GO:0003688, GO:0016791, GO:0016779, GO:0042578, GO:0050135, GO:0003953, GO:0061809	chlorophyll binding, catalytic activity, acting on DNA, ADP binding, DNA-directed DNA polymerase activity, poly(U) RNA binding, poly-pyrimidine tract binding, ATP-dependent activity, acting on DNA, DNA polymerase activity, DNA replication origin binding, phosphatase activity, nucleotidyltransferase activity, phosphoric ester hydrolase activity, NAD(P)+ nucleosidase activity, NAD+ nucleosidase act…	GO:0031976, GO:0009534, GO:0034357, GO:0042651, GO:0055035, GO:0009535, GO:0042170, GO:0009521, GO:0009522, GO:0031977, GO:0009543, GO:0031978, GO:0098807, GO:0009523, GO:0009654	plastid thylakoid, chloroplast thylakoid, photosynthetic membrane, thylakoid membrane, plastid thylakoid membrane, chloroplast thylakoid membrane, plastid membrane, photosystem, photosystem I, thylakoid lumen, chloroplast thylakoid lumen, plastid thylakoid lumen, chloroplast thylakoid membrane protein complex, photosystem II, photosystem II oxygen evolving complex	1609	2441	0.4014	0.7789	0.01089	0.2685	-0.09872	0.04176
13	Funiculus	FUN	13. FUN epidermal (CER3)	13. FUN epid	27	87	AT1G72060, AT2G01890, AT2G22980, AT2G28305, AT3G15500, AT2G40370, AT4G24000, AT3G50840, AT4G35770, AT4G35690, AT2G05540, AT1G61810, AT5G18860, AT4G27260, AT2G45220	NA, ATPAP8,PAP8, SCPL13, ATLOG1,LOG1, ANAC055,ANAC55,ATNAC3,NAC055,NAC3, LAC5, ATCSLG2,CSLG2, NA, ATSEN1,DIN1,SAG1,SEN1, NA, NA, BGLU45, NSH3, GH3.5,WES1, AtPME17,PME17	G1	0.7471	GO:0009642, GO:0090693, GO:0010150, GO:0016143, GO:0019757, GO:0019760, GO:1901657, GO:0016144, GO:0019758, GO:0019761, GO:1901659, GO:0044550, GO:0044272, GO:0009409, GO:0009768	response to light intensity, plant organ senescence, leaf senescence, S-glycoside metabolic process, glycosinolate metabolic process, glucosinolate metabolic process, glycosyl compound metabolic process, S-glycoside biosynthetic process, glycosinolate biosynthetic process, glucosinolate biosynthetic process, glycosyl compound biosynthetic process, secondary metabolite biosynthetic process, sulfur…	GO:0004497, GO:0016702, GO:0016701, GO:0051213, GO:0005372, GO:0015250, GO:0015144, GO:0016709, GO:0051119, GO:0015295, GO:0009044, GO:0046556, GO:0015294, GO:0016798, GO:0016168, GO:1901149	monooxygenase activity, oxidoreductase activity, acting on single donors with incorporation of molecular oxygen, incorporation of two atoms of oxygen, oxidoreductase activity, acting on single donors with incorporation of molecular oxygen, dioxygenase activity, water transmembrane transporter activity, water channel activity, carbohydrate transmembrane transporter activity, oxidoreductase activit…	GO:0048046, GO:0099503, GO:0005615, GO:0005764, GO:0009535, GO:0055035, GO:0000323, GO:0009705, GO:0009534, GO:0042651, GO:0031976, GO:0034357, GO:0042170	apoplast, secretory vesicle, extracellular space, lysosome, chloroplast thylakoid membrane, plastid thylakoid membrane, lytic vacuole, plant-type vacuole membrane, chloroplast thylakoid, thylakoid membrane, plastid thylakoid, photosynthetic membrane, plastid membrane	811.1	1242	1.013	1.227	0.01447	0.1563	-0.06571	-0.04914
14	Seed coat	CPT	14. CPT apical persistent nucellus (AGO3)	14. CPT apical	19	264	AT1G71050, AT1G51300, AT1G61095, AT1G61097, AT5G46300, AT3G21850, AT4G22050, AT1G61093, AT1G51030, AT1G61090, AT1G21475, AT5G46297, AT4G29640, AT1G31290, AT1G73000	AtHMP15,HIPP20, NA, NA, NA, NA, ASK9,SK9, NA, NA, NA, NA, NA, NA, NA, AGO3, PYL3,RCAR13	G1	0.697	GO:0046133, GO:0046135, GO:0046131, GO:0042454, GO:0006213, GO:0072529, GO:0009164, GO:0034656, GO:0009119, GO:1901658, GO:0009116, GO:0006865, GO:0072527, GO:0048437, GO:0003333, GO:0006833, GO:0042044	pyrimidine ribonucleoside catabolic process, pyrimidine nucleoside catabolic process, pyrimidine ribonucleoside metabolic process, ribonucleoside catabolic process, pyrimidine nucleoside metabolic process, pyrimidine-containing compound catabolic process, nucleoside catabolic process, nucleobase-containing small molecule catabolic process, ribonucleoside metabolic process, glycosyl compound catab…	GO:0019239, GO:0005372, GO:0015250, GO:0016814, GO:0015171, GO:0000987, GO:0000978, GO:0005342, GO:0046943, GO:0000981, GO:0000977, GO:0015172, GO:0015267, GO:0022803, GO:0008559	deaminase activity, water transmembrane transporter activity, water channel activity, hydrolase activity, acting on carbon-nitrogen (but not peptide) bonds, in cyclic amidines, amino acid transmembrane transporter activity, cis-regulatory region sequence-specific DNA binding, RNA polymerase II cis-regulatory region sequence-specific DNA binding, organic acid transmembrane transporter activity, ca…	GO:0005746, GO:1902495, GO:0098803, GO:1990351, GO:0070469, GO:0098800, GO:0016021, GO:0031224, GO:1990204, GO:0005747, GO:0045271, GO:0030964, GO:0098798, GO:0005743, GO:0031966	mitochondrial respirasome, transmembrane transporter complex, respiratory chain complex, transporter complex, respirasome, inner mitochondrial membrane protein complex, integral component of membrane, intrinsic component of membrane, oxidoreductase complex, mitochondrial respiratory chain complex I, respiratory chain complex I, NADH dehydrogenase complex, mitochondrial protein-containing complex,…	996.5	1540	1.196	0.7512	0.02008	0.1717	-0.06609	-0.02685
15	Seed coat	CZSC	15. CZSC placentochalazal phosphate transport (ARR22, SWEET10, and UMAMIT14)	15. CZSC plac phos	11	632	AT5G19530, AT2G18480, AT2G33350, AT4G27420, AT5G49630, AT2G39510, AT5G43180, AT3G20640, AT5G61480, AT3G23870, AT2G22190, AT1G68740, AT1G70920, AT5G24580, AT2G42280	ACL5, NA, NA, ABCG9, AAP6, UMAMIT14, NA, PFA6, PXY,TDR, ENOR3L2, TPPE, PHO1;H1, ATHB18,HB18, AtHMP47,HIPP09, AKS3,FBH4	G1	0.788	GO:0071215, GO:0097306, GO:0006820, GO:0009738, GO:0034220, GO:0098660, GO:0009966, GO:0010646, GO:0023051, GO:0015698, GO:0048481, GO:0006470, GO:0035670, GO:0010364, GO:0031335, GO:1900908, GO:1900911	cellular response to abscisic acid stimulus, cellular response to alcohol, anion transport, abscisic acid-activated signaling pathway, ion transmembrane transport, inorganic ion transmembrane transport, regulation of signal transduction, regulation of cell communication, regulation of signaling, inorganic anion transport, plant ovule development, protein dephosphorylation, plant-type ovary develo…	GO:0000981, GO:0008889, GO:0042802, GO:0008509, GO:0004805, GO:0042578, GO:0005372, GO:0015250, GO:0015103, GO:0016769, GO:0043178, GO:0000978, GO:0000987, GO:0008559, GO:0042562	DNA-binding transcription factor activity, RNA polymerase II-specific, glycerophosphodiester phosphodiesterase activity, identical protein binding, anion transmembrane transporter activity, trehalose-phosphatase activity, phosphoric ester hydrolase activity, water transmembrane transporter activity, water channel activity, inorganic anion transmembrane transporter activity, transferase activity, …	NA	NA	959.1	1380	0.6456	0.6617	0.01254	0.142	-0.07097	-0.04624
16	Seed coat	CZSC	16. CZSC placentochalazal callose-synthesizing (ARR22, TET5, and CALS8)	16. CZSC plac call	26	121	AT4G23410, AT2G28810, AT5G43440, AT1G26450, AT5G50820, AT1G30080, AT3G14780, AT5G37660, AT5G02460, AT4G28556, AT5G46590, AT5G23370, AT3G47540, AT3G14570, AT5G45320	TET5, NA, NA, NA, anac097,NAC097, NA, NA, PDLP7, PEAR2, RIC7, anac096,NAC096, NA, NA, ATGSL04,atgsl4,gsl04,GSL04,GSL4, NA	G1	0.8264	GO:0071215, GO:0097306, GO:0006074, GO:0006075, GO:0042594, GO:0031667, GO:0009738, GO:0009991, GO:0010073, GO:0046351, GO:0006820, GO:0010075, GO:1901657, GO:0035266, GO:0009312, GO:0009554	cellular response to abscisic acid stimulus, cellular response to alcohol, (1->3)-beta-D-glucan metabolic process, (1->3)-beta-D-glucan biosynthetic process, response to starvation, response to nutrient levels, abscisic acid-activated signaling pathway, response to extracellular stimulus, meristem maintenance, disaccharide biosynthetic process, anion transport, regulation of meristem growth, glyc…	GO:0000981, GO:0000987, GO:0000978, GO:0000977, GO:0008559, GO:0042626, GO:0019787, GO:0004842, GO:0061650, GO:0060089, GO:0003843, GO:0008889, GO:0015662, GO:0140358, GO:0015399	DNA-binding transcription factor activity, RNA polymerase II-specific, cis-regulatory region sequence-specific DNA binding, RNA polymerase II cis-regulatory region sequence-specific DNA binding, RNA polymerase II transcription regulatory region sequence-specific DNA binding, ABC-type xenobiotic transporter activity, ATPase-coupled transmembrane transporter activity, ubiquitin-like protein transfe…	GO:0000148	1,3-beta-D-glucan synthase complex	1155	1766	0.569	0.5573	0.002656	0.1668	-0.07365	-0.06743
17	Seed coat	ii1	17. ii1 basal (contains pigment strand) (BAN and ARR22)	17. ii1 basal cont PS	16	335	AT1G25460, AT3G59030, AT5G55320, AT2G28625, AT3G27200, AT2G42860, AT3G23460, AT3G28360, AT5G39160, AT1G61720, AT5G17220, AT3G59010, AT1G52400, AT2G47115, AT3G13530	NA, ATTT12,TT12, NA, PCA22, NA, NA, NA, ABCB16,PGP16, NA, BAN, ATGSTF12,GST26,GSTF12,TT19, PME35,PME61, ATBG1,BGL1,BGLU18, NA, MAP3KE1,MAPKKK7	G1	0.7403	GO:0009698, GO:0009813, GO:0009699, GO:0009962, GO:0009812, GO:0044550, GO:0006833, GO:0042044, GO:1901615, GO:0046189, GO:1901617, GO:0010214, GO:0009834, GO:1903338, GO:0046283	phenylpropanoid metabolic process, flavonoid biosynthetic process, phenylpropanoid biosynthetic process, regulation of flavonoid biosynthetic process, flavonoid metabolic process, secondary metabolite biosynthetic process, water transport, fluid transport, organic hydroxy compound metabolic process, phenol-containing compound biosynthetic process, organic hydroxy compound biosynthetic process, se…	GO:0005372, GO:0015250, GO:0000981, GO:0004805, GO:0051119, GO:0015267, GO:0022803, GO:0015662, GO:0140358, GO:0019203, GO:0016207, GO:0015145, GO:0000978, GO:0020037, GO:0000977	water transmembrane transporter activity, water channel activity, DNA-binding transcription factor activity, RNA polymerase II-specific, trehalose-phosphatase activity, sugar transmembrane transporter activity, channel activity, passive transmembrane transporter activity, P-type ion transporter activity, P-type transmembrane transporter activity, carbohydrate phosphatase activity, 4-coumarate-CoA…	GO:0009705, GO:0005774	plant-type vacuole membrane, vacuolar membrane	808.1	1158	0.7147	0.7376	0.01596	0.1614	-0.06557	-0.02293
18	Seed coat	ii1	18. ii1 endothelium (BAN and TT1)	18. ii1 endothel	24	200	AT4G11655, AT4G20050, AT4G38030, AT2G01670, AT4G25719, AT4G01970, AT2G28250, AT1G69820, AT1G24030, AT5G02540, AT1G77520, AT5G53100, AT2G23580, AT1G77210, AT5G57630	CASPL4A4, QRT3, NA, atnudt17,NUDT17, NA, AtSTS,RS4,STS, NCRK, GGT3,GGT4, PBL28, NA, NA, NA, ABE4,ATMES4,MES4, AtSTP14,STP14, CIPK21,SnRK3.4	G1	0.81	GO:0006631, GO:0009698, GO:0072330, GO:0009699, GO:0006633, GO:0044550, GO:0000038, GO:0009813, GO:0010200, GO:0042761, GO:0009812, GO:0010214, GO:0046189, GO:0016054, GO:1901605	fatty acid metabolic process, phenylpropanoid metabolic process, monocarboxylic acid biosynthetic process, phenylpropanoid biosynthetic process, fatty acid biosynthetic process, secondary metabolite biosynthetic process, very long-chain fatty acid metabolic process, flavonoid biosynthetic process, response to chitin, very long-chain fatty acid biosynthetic process, flavonoid metabolic process, se…	GO:0000981, GO:0000987, GO:0016746, GO:0102756, GO:0000978, GO:0000977, GO:0016790, GO:0015145, GO:0022853, GO:0016747, GO:0051119, GO:0042626, GO:0005385, GO:0046912, GO:0015144	DNA-binding transcription factor activity, RNA polymerase II-specific, cis-regulatory region sequence-specific DNA binding, acyltransferase activity, very-long-chain 3-ketoacyl-CoA synthase activity, RNA polymerase II cis-regulatory region sequence-specific DNA binding, RNA polymerase II transcription regulatory region sequence-specific DNA binding, thiolester hydrolase activity, monosaccharide t…	GO:0009705	plant-type vacuole membrane	1109	1945	0.5383	0.6259	0.01392	0.1752	-0.06661	-0.05524
19	Seed coat	ii1'	19. ii1' (DELTAVPE and UMAMIT29)	19. ii1'	18	314	AT3G07675, AT2G28550, AT2G37460, AT5G52900, AT4G20235, AT5G26120, AT5G59780, AT5G40390, AT4G01430, AT5G61280, AT4G32810, AT4G15393, AT1G53160, AT1G28650, AT1G74670	NA, RAP2.7,TOE1, UMAMIT12, MAKR6, CYP71A28, ASD2,ATASD2, ATMYB59,ATMYB59-1,ATMYB59-2,ATMYB59-3,MYB59, RS5,SIP1, UMAMIT29, NA, ATCCD8,CCD8,MAX4, CYP702A5, FTM6,SPL4, NA, GASA6	G1	0.8376	GO:0034976, GO:0042546, GO:0030968, GO:0071215, GO:0097306, GO:0006986, GO:0034620, GO:0035967, GO:0044264, GO:0071398, GO:0035966, GO:0036293, GO:0070482, GO:0042594, GO:0071395	response to endoplasmic reticulum stress, cell wall biogenesis, endoplasmic reticulum unfolded protein response, cellular response to abscisic acid stimulus, cellular response to alcohol, response to unfolded protein, cellular response to unfolded protein, cellular response to topologically incorrect protein, cellular polysaccharide metabolic process, cellular response to fatty acid, response to …	GO:0016759, GO:0005342, GO:0046943, GO:0015171, GO:0004497, GO:0008509, GO:0005338, GO:0016760, GO:0008324, GO:0005459, GO:0046556, GO:0005504, GO:0033293, GO:0015165, GO:0016411, GO:0046527, GO:0016758	cellulose synthase activity, organic acid transmembrane transporter activity, carboxylic acid transmembrane transporter activity, amino acid transmembrane transporter activity, monooxygenase activity, anion transmembrane transporter activity, nucleotide-sugar transmembrane transporter activity, cellulose synthase (UDP-forming) activity, cation transmembrane transporter activity, UDP-galactose tra…	GO:0005788, GO:0099503, GO:0098791, GO:0005789, GO:0000138, GO:0042175, GO:0098827, GO:0031985	endoplasmic reticulum lumen, secretory vesicle, Golgi apparatus subcompartment, endoplasmic reticulum membrane, Golgi trans cisterna, nuclear outer membrane-endoplasmic reticulum membrane network, endoplasmic reticulum subcompartment, Golgi cisterna	1124	1740	0.5201	0.5657	0.01087	0.09141	-0.08691	-0.05856
20	Seed coat	ii2	20. ii2 general (DELTAVPE and STK)	20. ii2 gen	8	746	AT4G21640, AT2G02000, AT3G23560, AT1G11990, AT2G19800, AT4G27435, AT2G45400, AT4G24150, AT3G18170, AT4G13345, AT3G56480, AT1G14970, AT3G26440, AT3G20210, AT4G09030	NA, GAD3, ALF5, NA, MIOX2, NA, BEN1, AtGRF8,GRF8, NA, MEE55, SCAB3, NA, NA, AEP4,DELTA-VPE,DELTAVPE, AGP10,ATAGP10	G1	0.8566	GO:0010200, GO:0036293, GO:0070482, GO:0001666, GO:0009409, GO:0009751, GO:0071407, GO:0071456, GO:0048438, GO:0036294, GO:0071453, GO:0042546, GO:0044036, GO:0006972, GO:0042538	response to chitin, response to decreased oxygen levels, response to oxygen levels, response to hypoxia, response to cold, response to salicylic acid, cellular response to organic cyclic compound, cellular response to hypoxia, floral whorl development, cellular response to decreased oxygen levels, cellular response to oxygen levels, cell wall biogenesis, cell wall macromolecule metabolic process,…	GO:0008483, GO:0016769, GO:0019900	transaminase activity, transferase activity, transferring nitrogenous groups, kinase binding	NA	NA	941.5	1347	0.6051	0.7066	0.01196	0.1142	-0.07345	-0.06058
21	Seed coat	oi1	21. oi1 flavinol synthesizing (MYB11)	21. oi1 flav synth	3, 0, 15	3283	AT4G24430, AT1G24070, AT3G62610, AT2G13810, AT1G23200, AT4G21590, AT5G24915, AT2G16750, AT2G36950, AT3G54140, AT4G25640, AT4G00870, AT2G47460, AT4G27240, AT4G16380	NA, ATCSLA10,CSLA10, ATMYB11,MYB11,PFG2, ALD1,AtALD1,EDTS5, HMS,PME6, ENDO3, NA, NA, AtHMP20, AtNPF8.1,ATPTR1,NPF8.1,PTR1, ATDTX35,DTX35,FFT, bHLH014,bHLH14, ATMYB12,MYB12,PFG1, NA, AtHMP35	G1	0.8443	GO:0042546, GO:1901615, GO:0009812, GO:0009813, GO:0009832, GO:1901617, GO:0000271, GO:0016051, GO:0044264, GO:0033692, GO:0034637, GO:0051553, GO:0051555, GO:0051552, GO:0051554	cell wall biogenesis, organic hydroxy compound metabolic process, flavonoid metabolic process, flavonoid biosynthetic process, plant-type cell wall biogenesis, organic hydroxy compound biosynthetic process, polysaccharide biosynthetic process, carbohydrate biosynthetic process, cellular polysaccharide metabolic process, cellular polysaccharide biosynthetic process, cellular carbohydrate biosynthe…	GO:0016207, GO:0046527, GO:0016759, GO:0016758, GO:0008194, GO:0016405, GO:0004714, GO:0016878, GO:0016760, GO:0019199, GO:0004497, GO:0035251, GO:0016709, GO:0004888, GO:0004713	4-coumarate-CoA ligase activity, glucosyltransferase activity, cellulose synthase activity, hexosyltransferase activity, UDP-glycosyltransferase activity, CoA-ligase activity, transmembrane receptor protein tyrosine kinase activity, acid-thiol ligase activity, cellulose synthase (UDP-forming) activity, transmembrane receptor protein kinase activity, monooxygenase activity, UDP-glucosyltransferase…	GO:0099081, GO:0099512, GO:0099513, GO:0005874, GO:0015630, GO:0055028	supramolecular polymer, supramolecular fiber, polymeric cytoskeletal fiber, microtubule, microtubule cytoskeleton, cortical microtubule	899.2	1315	0.5613	0.781	0.01572	0.08944	-0.08176	-0.04232
22	Seed coat	oi1	22. oi1 basal (MYB11 and PIN3)	22. oi1 basal	2	1119	AT4G26590, AT3G49360, AT2G38170, AT2G22620, AT1G73600, AT1G70940, AT1G35910, AT5G25770, AT2G02080, AT2G36420, AT1G27080, AT4G32500, AT4G34138, AT2G18550, AT3G05400	ATOPT5,OPT5, PGL2, ATCAX1,CAX1,RCI4, RGIL6, AtPMT3,DEG26,NMT,NMT3, ATPIN3,PIN3, AtTPPD,TPPD, NA, AtIDD4,IDD4,IME, TRM27, AtNPF2.12,NPF2.12,NRT1.6, AKT5,KT5, UGT73B1, ATHB21,HB-2,HB21, NA	G1	0.832	GO:1901615, GO:0009812, GO:0009813, GO:0006857, GO:0015833, GO:1901617, GO:0042886, GO:0042546, GO:0009733, GO:0051553, GO:0051555, GO:0046148, GO:0051552, GO:0051554, GO:0007389	organic hydroxy compound metabolic process, flavonoid metabolic process, flavonoid biosynthetic process, oligopeptide transport, peptide transport, organic hydroxy compound biosynthetic process, amide transport, cell wall biogenesis, response to auxin, flavone biosynthetic process, flavonol biosynthetic process, pigment biosynthetic process, flavone metabolic process, flavonol metabolic process, …	GO:0004497	monooxygenase activity	NA	NA	757.8	1039	0.6441	0.773	0.01454	0.1183	-0.06568	-0.03888
23	Seed coat	oi1	23. oi1 flavinol synthesizing high PCD (MYB11, SCOOP15, BAP1)	23. oi1 flav synth high PCD	10	635	AT5G08760, AT2G32190, AT1G73540, AT3G62610, AT3G52800, AT3G61190, AT5G64900, AT2G22500, AT2G13810, AT2G38170, AT2G23810, AT5G24910, AT4G25640, AT2G05940, AT5G39220	STMP8, AthCYSTM4, atnudt21,NUDT21, ATMYB11,MYB11,PFG2, NA, BAP1, ATPEP1,PEP1,PROPEP1, ATPUMP5,DIC1,UCP5, ALD1,AtALD1,EDTS5, ATCAX1,CAX1,RCI4, TET8, CYP714A1,ELA1, ATDTX35,DTX35,FFT, PBL14,RIPK, NA	G1	0.8315	GO:0071456, GO:0036294, GO:0071453, GO:0010200, GO:0001666, GO:0036293, GO:0070482, GO:0009813, GO:0009812, GO:0009751, GO:1901615, GO:0009411, GO:0009863, GO:0009723, GO:0071446	cellular response to hypoxia, cellular response to decreased oxygen levels, cellular response to oxygen levels, response to chitin, response to hypoxia, response to decreased oxygen levels, response to oxygen levels, flavonoid biosynthetic process, flavonoid metabolic process, response to salicylic acid, organic hydroxy compound metabolic process, response to UV, salicylic acid mediated signaling…	GO:0016207, GO:0016405, GO:0016878, GO:0015291, GO:0016840, GO:0015297, GO:0042910, GO:0042802	4-coumarate-CoA ligase activity, CoA-ligase activity, acid-thiol ligase activity, secondary active transmembrane transporter activity, carbon-nitrogen lyase activity, antiporter activity, xenobiotic transmembrane transporter activity, identical protein binding	NA	NA	907.2	1323	0.5463	0.722	0.0216	0.09449	-0.0776	-0.04372
24	Seed coat	oi1	24. oi micropylar (SWEET12)	24. oi micr	20	251	AT1G02850, AT1G44800, AT3G05390, AT5G23660, AT1G73220, AT3G23430, AT5G63180, AT1G30820, AT4G20320, AT1G55110, AT3G05155, AT5G25890, AT1G65780, AT2G37740, AT5G38970	BGLU11, SIAR1,UMAMIT18, NA, AtSWEET12,MTN3,SWEET12, AtOCT1,OCT1, ATPHO1,PHO1, NA, CTPS1, CTPS4, AtIDD7,IDD7,REDSTART, NA, IAA28,IAR2, NA, ATZFP10,ZFP10, ATBR6OX,BR6OX,BR6OX1,CYP85A1	G1	0.8526	GO:0048438, GO:0048437, GO:0048467, GO:0048481, GO:0035670, GO:0048440, GO:0080060, GO:0031667, GO:0036293, GO:0010016, GO:0070482, GO:0097237	floral whorl development, floral organ development, gynoecium development, plant ovule development, plant-type ovary development, carpel development, integument development, response to nutrient levels, response to decreased oxygen levels, shoot system morphogenesis, response to oxygen levels, cellular response to toxic substance	GO:0051119, GO:0015144, GO:0019900	sugar transmembrane transporter activity, carbohydrate transmembrane transporter activity, kinase binding	NA	NA	808.7	1159	0.6373	0.8532	0.02034	0.1248	-0.06591	-0.05251
25	Seed coat	oi1	25. oi1 S-phase (MYB11 and TSO2)	25. oi1 flav synth s-phase	25	138	AT3G27060, AT3G20670, AT5G63550, AT5G23420, AT5G65350, AT1G04020, AT5G59870, AT4G27230, AT4G00020, AT4G21070, AT3G06740, AT5G38690, AT5G22880, AT3G59100, AT3G14740	ATTSO2,TSO2, HTA13, NA, HMGB6, HTR11, ATBARD1,BARD1,ROW1, h2a.w.6,HTA6, HTA2, BRCA2(IV),BRCA2A,EDA20,MEE43, ATBRCA1,BRCA1, GATA15, DDR1, H2B,HTB2, ATGSL11,gsl11,GSL11, NA	S	0.7681	GO:0006310, GO:0006302, GO:0006974, GO:0006281, GO:0000724, GO:0000725, GO:0006260, GO:0051276, GO:0000278, GO:0006261, GO:0007059, GO:0098813, GO:1903047, GO:0065004, GO:0006325	DNA recombination, double-strand break repair, cellular response to DNA damage stimulus, DNA repair, double-strand break repair via homologous recombination, recombinational repair, DNA replication, chromosome organization, mitotic cell cycle, DNA-templated DNA replication, chromosome segregation, nuclear chromosome segregation, mitotic cell cycle process, protein-DNA complex assembly, chromatin …	GO:0030527, GO:0003682, GO:0046982, GO:0005198, GO:0003697, GO:0003688, GO:0140097, GO:0003684, GO:0003678, GO:0008168, GO:0008094, GO:0031491, GO:0008757, GO:0016741, GO:0016887	structural constituent of chromatin, chromatin binding, protein heterodimerization activity, structural molecule activity, single-stranded DNA binding, DNA replication origin binding, catalytic activity, acting on DNA, damaged DNA binding, DNA helicase activity, methyltransferase activity, ATP-dependent activity, acting on DNA, nucleosome binding, S-adenosylmethionine-dependent methyltransferase …	GO:0005694, GO:0032993, GO:0000785, GO:0044815, GO:0043596, GO:0005657, GO:0030894, GO:0043601, GO:0035861, GO:0090734, GO:0000228, GO:0000786, GO:0042575, GO:0098687, GO:0000793	chromosome, protein-DNA complex, chromatin, DNA packaging complex, nuclear replication fork, replication fork, replisome, nuclear replisome, site of double-strand break, site of DNA damage, nuclear chromosome, nucleosome, DNA polymerase complex, chromosomal region, condensed chromosome	993.3	1443	0.5462	0.7199	0.04953	0.5997	-0.08031	0.437
26	Seed coat	oi2	26. oi2 LTP-enriched (LTP1)	26. oi2 LTP	4	1015	AT2G38540, AT1G72260, AT3G08770, AT4G15750, AT5G59320, AT3G20470, AT4G21620, AT1G56580, AT4G12870, AT3G09390, AT2G38900, AT3G23450, AT1G56100, AT1G62333, AT4G12960	ATLTP1,AtLtpI-4,LP1,LTP1, THI2.1,THI2.1.1, AtLtpI-6,LTP6, NA, LTP3, ATGRP-5,ATGRP5,GRP-5,GRP5, NA, SVB, NA, ATMT-1,ATMT-K,MT2A, NA, KRATOS, NA, NA, AtGILT,GILT	G1	0.6424	GO:0015980, GO:0009060, GO:0045333, GO:0006119, GO:0019646, GO:0042773, GO:0022904, GO:0042775, GO:0006120, GO:0006631, GO:0006091, GO:0022900, GO:0009853, GO:0072330, GO:0000038	energy derivation by oxidation of organic compounds, aerobic respiration, cellular respiration, oxidative phosphorylation, aerobic electron transport chain, ATP synthesis coupled electron transport, respiratory electron transport chain, mitochondrial ATP synthesis coupled electron transport, mitochondrial electron transport, NADH to ubiquinone, fatty acid metabolic process, generation of precurso…	GO:0005198, GO:0003735, GO:0005507, GO:0016671, GO:0015453, GO:0031386, GO:0004857, GO:0003746, GO:0016667, GO:0003955, GO:0009678, GO:0042625, GO:0044769, GO:0046961, GO:0016655	structural molecule activity, structural constituent of ribosome, copper ion binding, oxidoreductase activity, acting on a sulfur group of donors, disulfide as acceptor, oxidoreduction-driven active transmembrane transporter activity, protein tag, enzyme inhibitor activity, translation elongation factor activity, oxidoreductase activity, acting on a sulfur group of donors, NAD(P)H dehydrogenase (…	GO:0070469, GO:0098803, GO:0005746, GO:0098800, GO:0098798, GO:0005743, GO:0005740, GO:1990351, GO:1902495, GO:0031966, GO:0022626, GO:0019866, GO:1990204, GO:0005840, GO:0045271	respirasome, respiratory chain complex, mitochondrial respirasome, inner mitochondrial membrane protein complex, mitochondrial protein-containing complex, mitochondrial inner membrane, mitochondrial envelope, transporter complex, transmembrane transporter complex, mitochondrial membrane, cytosolic ribosome, organelle inner membrane, oxidoreductase complex, ribosome, respiratory chain complex I	1036	1692	1.248	0.9562	0.03412	0.202	-0.06105	-0.02841
27	Seed coat	oi2	27. oi2 general (GLABRA2)	27. oi2 gen	5	949	AT3G20395, AT1G35630, AT2G15050, AT3G26450, AT4G19380, AT2G32430, AT1G35180, AT4G14750, AT2G23550, AT4G05120, AT1G65985, AT2G37300, AT1G71030, AT1G79840, AT1G51460	ATL92, RMR5, LTP,LTP7, NA, NA, NA, NA, IQD19, ABE1,ATMES6,MES6, ATENT3,ENT3,FUR1, NA, ABCI16, ATMYBL2,MYBL2, GL2, ABCG13,FOP2	G1	0.803	GO:0010214, GO:0010191, GO:0072330, GO:0010143, GO:0010192, GO:0009695, GO:0008544, GO:0009913, GO:0030855, GO:0010025, GO:0010166, GO:0060429, GO:0006631, GO:0042335, GO:1901570	seed coat development, mucilage metabolic process, monocarboxylic acid biosynthetic process, cutin biosynthetic process, mucilage biosynthetic process, jasmonic acid biosynthetic process, epidermis development, epidermal cell differentiation, epithelial cell differentiation, wax biosynthetic process, wax metabolic process, epithelium development, fatty acid metabolic process, cuticle development,…	GO:0047714, GO:0102756, GO:0008970, GO:0140359, GO:0016701, GO:0000981, GO:0016702, GO:0016899, GO:0042626, GO:0035673, GO:0032029, GO:0032036, GO:0080115, GO:1904680	galactolipase activity, very-long-chain 3-ketoacyl-CoA synthase activity, phospholipase A1 activity, ABC-type transporter activity, oxidoreductase activity, acting on single donors with incorporation of molecular oxygen, DNA-binding transcription factor activity, RNA polymerase II-specific, oxidoreductase activity, acting on single donors with incorporation of molecular oxygen, incorporation of t…	GO:0005788	endoplasmic reticulum lumen	1186	1853	0.5254	0.61	0.01647	0.1238	-0.08374	-0.05064
28	Seed coat	oi2	28. oi2 very long chain fatty acid-synthesizing (KCS6 and WRI4)	28. oi2 VLCFA synth	23	205	AT1G75880, AT1G51440, AT1G79700, AT4G20320, AT1G56600, AT5G45920, AT1G45010, AT1G68530, AT4G33790, AT5G52310, AT1G27940, AT3G62070, AT1G01120, AT3G53420, AT4G27830	NA, DALL2, WRI4, CTPS4, AtGolS2,GolS2, NA, NA, AtCER6,AtCUT1,CER6,CUT1,G2,KCS6,POP1, CER4,FAR3,G7, COR78,LTI140,LTI78,RD29A, ABCB13,PGP13, NA, KCS1, AtPIP2;1,PIP2,PIP2;1,PIP2A, AtBGLU10,BGLU10	G1	0.761	GO:0042886, GO:0008544, GO:0009913, GO:0030855, GO:0072330, GO:0060429, GO:0010025, GO:0010166, GO:0006857, GO:0015833, GO:1901570, GO:0010214, GO:1901568, GO:0048481, GO:0035670	amide transport, epidermis development, epidermal cell differentiation, epithelial cell differentiation, monocarboxylic acid biosynthetic process, epithelium development, wax biosynthetic process, wax metabolic process, oligopeptide transport, peptide transport, fatty acid derivative biosynthetic process, seed coat development, fatty acid derivative metabolic process, plant ovule development, pla…	GO:0140359, GO:0042626, GO:0000981, GO:0015399, GO:0042887, GO:0005372, GO:0015250, GO:0102756, GO:0008289, GO:0035673, GO:1904680, GO:0015112	ABC-type transporter activity, ATPase-coupled transmembrane transporter activity, DNA-binding transcription factor activity, RNA polymerase II-specific, primary active transmembrane transporter activity, amide transmembrane transporter activity, water transmembrane transporter activity, water channel activity, very-long-chain 3-ketoacyl-CoA synthase activity, lipid binding, oligopeptide transmemb…	GO:0048046	apoplast	737.4	1018	0.7231	0.8035	0.01106	0.1658	-0.05164	-0.04656
29	Seed coat	oi2	29. oi2 S-phase (GLABRA2, TSO2)	29. oi2 s-phase	28	64	AT3G06740, AT4G19380, AT5G65350, AT1G04020, AT5G45670, AT3G59100, AT1G05230, AT3G50660, AT5G63550, AT1G23420, AT3G26450, AT5G23420, AT2G37300, AT5G38690, AT1G17200	GATA15, NA, HTR11, ATBARD1,BARD1,ROW1, NA, ATGSL11,gsl11,GSL11, HDG2, AtDWF4,CLM,CYP90B1,DWF4,PSC1,SAV1,SNP2, NA, INO, NA, HMGB6, ABCI16, DDR1, CASPL2A1	S	0.9062	GO:0006260, GO:0006261, GO:0006974, GO:0006281, GO:0000724, GO:0006302, GO:0000725, GO:0006310, GO:0006270, GO:0051276, GO:0000278, GO:1903047, GO:0010143, GO:0000076, GO:0006268	DNA replication, DNA-templated DNA replication, cellular response to DNA damage stimulus, DNA repair, double-strand break repair via homologous recombination, double-strand break repair, recombinational repair, DNA recombination, DNA replication initiation, chromosome organization, mitotic cell cycle, mitotic cell cycle process, cutin biosynthetic process, DNA replication checkpoint signaling, DN…	GO:0030527, GO:0003682, GO:0046982, GO:0003697, GO:0003688, GO:0102756, GO:0140097, GO:0000981, GO:0003678, GO:0008094, GO:0003684, GO:0009922, GO:0017116, GO:0140359, GO:0043138, GO:0042393	structural constituent of chromatin, chromatin binding, protein heterodimerization activity, single-stranded DNA binding, DNA replication origin binding, very-long-chain 3-ketoacyl-CoA synthase activity, catalytic activity, acting on DNA, DNA-binding transcription factor activity, RNA polymerase II-specific, DNA helicase activity, ATP-dependent activity, acting on DNA, damaged DNA binding, fatty …	GO:0005694, GO:0032993, GO:0000228, GO:0043596, GO:0005657, GO:0030894, GO:0043601, GO:0042575, GO:0000785, GO:0035861, GO:0090734, GO:0044815, GO:0010369, GO:0098687, GO:0000347	chromosome, protein-DNA complex, nuclear chromosome, nuclear replication fork, replication fork, replisome, nuclear replisome, DNA polymerase complex, chromatin, site of double-strand break, site of DNA damage, DNA packaging complex, chromocenter, chromosomal region, THO complex	1133	1693	0.5241	0.6465	0.02923	0.8431	-0.07265	0.598

## Sheet: 7 DAP
level_3_plotting	level_1_annotation	level_2_annotation	level_3_annotation_full	level_3_annotation_abbr	optimal_clusters_res_1	n_cells	top_markers_locus_IDs	top_markers_symbols	primary_cc_phase	primary_cc_phase_prop	top_BP_GO_ID	top_BP_GO_Description	top_MF_GO_ID	top_MF_GO_Description	top_CC_GO_ID	top_CC_GO_Description	mean_nFeature_RNA	mean_nCount_RNA	mean_percent_mito	mean_percent_chlor	mean_doublet_score	mean_percent_cc	mean_G2M_Score	mean_S_Score
1	Embryo	EMB	1. EMB inner cotyledon (XYL4)	1. EMB inn cotyl	1	1572	AT2G10940, AT1G09750, AT4G16860, AT5G64570, AT1G62500, AT4G28520, AT3G22640, AT3G12203, AT5G44120, AT4G36700, AT4G27160, AT5G46690, AT5G07030, AT5G07190, AT5G64530	NA, NA, CHS2,RPP4, ATBXL4,XYL4, DEG27, CRC,CRU3, PAP85, scpl17, ATCRA1,CRA1,CRU1, NA, AT2S3,SESA3, bHLH071, NA, ATS3, ANAC104,XND1	G1	0.5814	GO:0015979, GO:0019684, GO:0006091, GO:0009768, GO:0033013, GO:0009765, GO:0006778, GO:0015994, GO:0006633, GO:0006779, GO:0015995, GO:0033014, GO:0006631, GO:0072330, GO:0009642, GO:0046148	photosynthesis, photosynthesis, light reaction, generation of precursor metabolites and energy, photosynthesis, light harvesting in photosystem I, tetrapyrrole metabolic process, photosynthesis, light harvesting, porphyrin-containing compound metabolic process, chlorophyll metabolic process, fatty acid biosynthetic process, porphyrin-containing compound biosynthetic process, chlorophyll biosynthe…	GO:0016168, GO:0004312, GO:0008266, GO:0046906, GO:0008187, GO:0033293, GO:0080044, GO:0015267, GO:0022803, GO:0003899, GO:0080043, GO:0031406, GO:0034062, GO:0097747, GO:0005504, GO:0008379, GO:0051920, GO:0140824, GO:0016747, GO:0046933, GO:0016746	chlorophyll binding, fatty acid synthase activity, poly(U) RNA binding, tetrapyrrole binding, poly-pyrimidine tract binding, monocarboxylic acid binding, quercetin 7-O-glucosyltransferase activity, channel activity, passive transmembrane transporter activity, DNA-directed 5'-3' RNA polymerase activity, quercetin 3-O-glucosyltransferase activity, carboxylic acid binding, 5'-3' RNA polymerase activ…	GO:0009534, GO:0031976, GO:0034357, GO:0055035, GO:0042651, GO:0009535, GO:0042170, GO:0009521, GO:0009522, GO:0010287, GO:0048046, GO:0098807, GO:0009547, GO:0031977, GO:0009523	chloroplast thylakoid, plastid thylakoid, photosynthetic membrane, plastid thylakoid membrane, thylakoid membrane, chloroplast thylakoid membrane, plastid membrane, photosystem, photosystem I, plastoglobule, apoplast, chloroplast thylakoid membrane protein complex, plastid ribosome, thylakoid lumen, photosystem II	667.4	949.2	0.2484	2.109	0.01492	0.1035	-0.02412	0.0005771
2	Embryo	EMB	2. EMB protoderm (PDF1)	2. EMB proto	2	1408	AT1G72970, AT5G45670, AT3G21090, AT5G49330, AT5G22810, AT3G05600, AT4G15630, AT1G24470, AT4G33220, AT2G42840, AT5G23940, AT4G15620, AT1G71691, AT3G43720, AT1G04660	EDA17,HTH, NA, ABCG15, ATMYB111,MYB111,PFG3, NA, AtEH1, CASPL1E1, ATKCR2,KCR2, ATPME44,PME44, PDF1, DCR,EMB3009,PEL3, CASPL1E2, NA, LTPG2, NA	G1	0.6406	GO:0045165, GO:0001708, GO:0072330, GO:0006631, GO:0007389, GO:0009798, GO:0065001, GO:0071695, GO:0010158, GO:0021700, GO:0009943, GO:0003002, GO:0006633, GO:0090626, GO:0010026	cell fate commitment, cell fate specification, monocarboxylic acid biosynthetic process, fatty acid metabolic process, pattern specification process, axis specification, specification of axis polarity, anatomical structure maturation, abaxial cell fate specification, developmental maturation, adaxial/abaxial axis specification, regionalization, fatty acid biosynthetic process, plant epidermis mor…	GO:0016705, GO:0016712, GO:0016405, GO:0030570, GO:0016878, GO:0016877, GO:0016837, GO:0102756, GO:0016835	oxidoreductase activity, acting on paired donors, with incorporation or reduction of molecular oxygen, oxidoreductase activity, acting on paired donors, with incorporation or reduction of molecular oxygen, reduced flavin or flavoprotein as one donor, and incorporation of one atom of oxygen, CoA-ligase activity, pectate lyase activity, acid-thiol ligase activity, ligase activity, forming carbon-su…	GO:0005811, GO:0012511	lipid droplet, monolayer-surrounded lipid storage body	781	1120	0.2294	1.721	0.01725	0.09495	-0.03027	-0.001262
3	Embryo	EMB	3. EMB dividing (MAD2, HMGB6)	3. EMB dividing	8	657	AT5G01910, AT3G15550, AT3G01710, AT4G35620, AT1G76310, AT1G72250, AT5G55520, AT5G66230, AT4G38062, AT4G15830, AT1G20930, AT1G03780, AT3G55660, AT4G21270, AT4G01730	NA, NA, NA, CYCB2;2, CYCB2;4, MDKIN1, NA, NA, NA, NA, CDKB2;2, AtTPX2,TPX2, ATROPGEF6,ROPGEF6, ATK1,KATA,KATAP, NA	G2M	0.6651	GO:0000278, GO:0051321, GO:1903047, GO:1903046, GO:0000280, GO:0051276, GO:0051726, GO:0048285, GO:0007059, GO:0044770, GO:0098813, GO:0007017, GO:0010564, GO:0000819, GO:0006260	mitotic cell cycle, meiotic cell cycle, mitotic cell cycle process, meiotic cell cycle process, nuclear division, chromosome organization, regulation of cell cycle, organelle fission, chromosome segregation, cell cycle phase transition, nuclear chromosome segregation, microtubule-based process, regulation of cell cycle process, sister chromatid segregation, DNA replication	GO:0008017, GO:0015631, GO:0008092, GO:0003777, GO:0003774, GO:0140097, GO:0016538, GO:0030527, GO:0005198, GO:0008094, GO:0019207, GO:0019887, GO:0017111, GO:0016887, GO:0003678	microtubule binding, tubulin binding, cytoskeletal protein binding, microtubule motor activity, cytoskeletal motor activity, catalytic activity, acting on DNA, cyclin-dependent protein serine/threonine kinase regulator activity, structural constituent of chromatin, structural molecule activity, ATP-dependent activity, acting on DNA, kinase regulator activity, protein kinase regulator activity, ri…	GO:0005856, GO:0015630, GO:0005694, GO:0099081, GO:0099512, GO:0099513, GO:0005874, GO:0099080, GO:0005819, GO:0005875, GO:0000793, GO:0000307, GO:0009524, GO:1902554, GO:0000775	cytoskeleton, microtubule cytoskeleton, chromosome, supramolecular polymer, supramolecular fiber, polymeric cytoskeletal fiber, microtubule, supramolecular complex, spindle, microtubule associated complex, condensed chromosome, cyclin-dependent protein kinase holoenzyme complex, phragmoplast, serine/threonine protein kinase complex, chromosome, centromeric region	974.3	1429	0.2686	1.706	0.02004	2.638	0.4267	0.1162
4	Embryo	EMB	4. EMB vascular primordium (SHR)	4. EMB vasc prim	9	625	AT1G75500, AT2G07680, AT1G27660, AT1G28110, AT5G50150, AT4G37650, AT2G23050, AT2G26700, AT2G21050, AT1G52150, AT1G73590, AT5G35670, AT3G51950, AT5G01890, AT4G32880	UMAMIT5,WAT1, ABCC13,AtABCC13,ATMRP11,MRP11, PFA5, SCPL45, LOTR1, EAL1,SGR7,SHR, MEL4,NPY4, AGC1-10,PID2, LAX2, ATHB-15,ATHB15,CNA,ICU4, ATPIN1,PIN1, iqd33, NA, PXC2, ATHB-8,ATHB8,HB-8	G1	0.5536	GO:0007389, GO:0003002, GO:0010087, GO:0010817, GO:0048532, GO:0010051, GO:0010016, GO:0010073, GO:0009733, GO:0010089, GO:0071365, GO:0060918, GO:0009914, GO:0009933, GO:0009629	pattern specification process, regionalization, phloem or xylem histogenesis, regulation of hormone levels, anatomical structure arrangement, xylem and phloem pattern formation, shoot system morphogenesis, meristem maintenance, response to auxin, xylem development, cellular response to auxin stimulus, auxin transport, hormone transport, meristem structural organization, response to gravity	GO:0042802, GO:0080161, GO:0010329, GO:0060089, GO:0038023, GO:0004180, GO:0001653, GO:0051015, GO:0008238, GO:0000981, GO:0042803, GO:0030570, GO:0008236, GO:0017171	identical protein binding, auxin transmembrane transporter activity, auxin efflux transmembrane transporter activity, molecular transducer activity, signaling receptor activity, carboxypeptidase activity, peptide receptor activity, actin filament binding, exopeptidase activity, DNA-binding transcription factor activity, RNA polymerase II-specific, protein homodimerization activity, pectate lyase …	NA	NA	695.9	927.9	0.3173	1.442	0.008653	0.1542	-0.01862	0.007059
5	Embryo	EMB	5. EMB ground tissue initials (JKD, SCR)	5. EMB gro tiss init	12	425	AT5G10278, AT5G10280, AT5G65230, AT5G65225, AT1G47860, AT2G01770, AT3G05470, AT1G78970, AT4G13190, AT1G60800, AT1G23000, AT3G54220, AT2G24700, AT4G08150, AT3G43800	NA, ATMYB64,ATMYB92,MYB92, AtMYB53,MYB53, NA, NA, ATVIT1,VIT1, FH11, ATLUP1,LUP1, PBL24, AtNIK3,CIK1,NIK3, AtHMP05, SCR,SGR1, REM32, BP,BP1,KNAT1, ATGSTU27,GSTU27	G1	0.6329	GO:0007389, GO:0003002, GO:0010016, GO:0001708, GO:0008356, GO:0010431, GO:0009629, GO:0000910, GO:0009965, GO:0090698, GO:0045165, GO:0007015, GO:0048646, GO:0051321, GO:0030036, GO:0009944	pattern specification process, regionalization, shoot system morphogenesis, cell fate specification, asymmetric cell division, seed maturation, response to gravity, cytokinesis, leaf morphogenesis, post-embryonic plant morphogenesis, cell fate commitment, actin filament organization, anatomical structure formation involved in morphogenesis, meiotic cell cycle, actin cytoskeleton organization, pol…	GO:0000981, GO:0000987, GO:0000978, GO:0000977, GO:0042802, GO:0042803	DNA-binding transcription factor activity, RNA polymerase II-specific, cis-regulatory region sequence-specific DNA binding, RNA polymerase II cis-regulatory region sequence-specific DNA binding, RNA polymerase II transcription regulatory region sequence-specific DNA binding, identical protein binding, protein homodimerization activity	GO:0005811, GO:0012511, GO:0098807	lipid droplet, monolayer-surrounded lipid storage body, chloroplast thylakoid membrane protein complex	693	963.4	0.2228	1.283	0.0147	0.107	-0.02365	-0.006332
6	Embryo	EMB	6. EMB cortical initials (JKD)	6. EMB cort init	13	298	AT3G23470, AT3G06778, AT3G05150, AT5G03150, AT5G17810, AT2G40260, AT5G62170, AT1G17285, AT4G30880, AT4G00770, AT3G54400, AT4G22010, AT1G62500, AT4G03050, AT1G60630	NA, NA, NA, JKD, WOX12, NA, TRM25, NA, NA, TRM9, NA, sks4, DEG27, AOP3, NA	G1	0.6711	GO:0016052, GO:0009639, GO:0007389, GO:0016126, GO:0003002, GO:0009629, GO:0016125, GO:0021700, GO:0009606, GO:0090698, GO:0009733, GO:0071695, GO:0008202, GO:0006694, GO:1901615, GO:0008356, GO:0006544, GO:0009313	carbohydrate catabolic process, response to red or far red light, pattern specification process, sterol biosynthetic process, regionalization, response to gravity, sterol metabolic process, developmental maturation, tropism, post-embryonic plant morphogenesis, response to auxin, anatomical structure maturation, steroid metabolic process, steroid biosynthetic process, organic hydroxy compound meta…	GO:0004553, GO:0016798, GO:0015926, GO:0140359, GO:0003680, GO:0008422, GO:0000217, GO:0008559	hydrolase activity, hydrolyzing O-glycosyl compounds, hydrolase activity, acting on glycosyl bonds, glucosidase activity, ABC-type transporter activity, minor groove of adenine-thymine-rich DNA binding, beta-glucosidase activity, DNA secondary structure binding, ABC-type xenobiotic transporter activity	NA	NA	973.1	1463	0.1647	1.296	0.03594	0.1164	-0.03139	-0.001072
7	Embryo	EMB	7. EMB hypophysis (SMB)	7. EMB hypoph	19	156	AT1G79580, AT2G46850, AT3G20840, AT1G33750, AT3G30350, AT1G26870, AT5G01870, AT2G03830, AT2G28760, AT4G35030, AT3G42180, AT5G48940, AT5G14690, AT2G12646, AT2G41800	ANAC033,SMB,URP7, NA, AtPLT1,PLT1, TPS22, GLV3,RGF4, ANAC009,FEZ, NA, CLEL2,GLV6,RGF8, UXS6, NA, NA, RGFR2,RGI2, NA, PLATZ7,RITF1, TEB	G1	0.5513	GO:0035266, GO:0009733, GO:0010075, GO:0007389, GO:0010073, GO:0001708, GO:0008356, GO:0010252, GO:2000280, GO:0045165, GO:0009958, GO:2000067, GO:0010449, GO:0090696, GO:0009798	meristem growth, response to auxin, regulation of meristem growth, pattern specification process, meristem maintenance, cell fate specification, asymmetric cell division, auxin homeostasis, regulation of root development, cell fate commitment, positive gravitropism, regulation of root morphogenesis, root meristem growth, post-embryonic plant organ development, axis specification	GO:0003680, GO:0000217, GO:0010329, GO:0080161, GO:0016712	minor groove of adenine-thymine-rich DNA binding, DNA secondary structure binding, auxin efflux transmembrane transporter activity, auxin transmembrane transporter activity, oxidoreductase activity, acting on paired donors, with incorporation or reduction of molecular oxygen, reduced flavin or flavoprotein as one donor, and incorporation of one atom of oxygen	NA	NA	777.5	1062	0.3187	1.469	0.02026	0.1458	-0.02811	0.02642
8	Endosperm	CZE	8. CZE photosynthetic (GA3OX4)	8. CZE photo	0	1760	AT3G07620, AT4G26050, AT3G55240, AT4G37360, AT4G04605, AT1G13590, AT1G27040, AT3G14660, AT1G08320, AT4G10380, AT5G52830, AT5G27350, AT1G22740, AT4G28790, AT5G58660	NA, PIRL8, NA, CYP81D2, NA, ATPSK1,PSK1, AtNPF4.5,NPF4.5, CYP72A13, bZIP21,TGA9, AtNIP5;1,NIP5;1,NLM6,NLM8, ATWRKY27,WRKY27, SFP1, ATRABG3B,RAB7,RAB75,RABG3B, NA, GA2ox9	G1	0.7205	GO:0015979, GO:0019684, GO:0015994, GO:0006091, GO:0033013, GO:0006778, GO:0071478, GO:0009642, GO:0019318, GO:0071214, GO:0104004, GO:0009658, GO:0009767, GO:0007623, GO:0048511, GO:0030388, GO:0006006	photosynthesis, photosynthesis, light reaction, chlorophyll metabolic process, generation of precursor metabolites and energy, tetrapyrrole metabolic process, porphyrin-containing compound metabolic process, cellular response to radiation, response to light intensity, hexose metabolic process, cellular response to abiotic stimulus, cellular response to environmental stimulus, chloroplast organiza…	GO:0043531, GO:0050135, GO:0003953, GO:0061809, GO:0016614, GO:0004033, GO:0015291, GO:0008106, GO:0015144, GO:0003727, GO:0050308, GO:0016616, GO:0008194, GO:0005506, GO:0016899	ADP binding, NAD(P)+ nucleosidase activity, NAD+ nucleosidase activity, NAD+ nucleotidase, cyclic ADP-ribose generating, oxidoreductase activity, acting on CH-OH group of donors, aldo-keto reductase (NADP) activity, secondary active transmembrane transporter activity, alcohol dehydrogenase (NADP+) activity, carbohydrate transmembrane transporter activity, single-stranded RNA binding, sugar-phosph…	GO:0009534, GO:0031976, GO:0034357, GO:0042651, GO:0009535, GO:0055035, GO:0042170, GO:0031977, GO:0009543, GO:0031978, GO:0009521, GO:0009523, GO:0009654, GO:0042646, GO:0009295	chloroplast thylakoid, plastid thylakoid, photosynthetic membrane, thylakoid membrane, chloroplast thylakoid membrane, plastid thylakoid membrane, plastid membrane, thylakoid lumen, chloroplast thylakoid lumen, plastid thylakoid lumen, photosystem, photosystem II, photosystem II oxygen evolving complex, plastid nucleoid, nucleoid	1150	1682	0.187	0.9945	0.01769	0.1044	-0.03208	-0.008916
9	Endosperm	CZE	9. CZE LEA-enriched (ABR)	9. CZE lea	18	157	AT2G40000, AT4G34410, AT1G13530, AT1G19380, AT1G18300, AT3G02480, AT4G19200, AT4G36010, AT4G11280, AT1G27040, AT1G18740, AT2G27080, AT5G05410, AT1G36060, AT4G24570	ATHSPRO2,HSPRO2, ERF109,RRTF1, SNAP30, NA, atnudt4,NUDT4, ABR, GPRP3, NA, ACS6,ATACS6, AtNPF4.5,NPF4.5, B1L, NHL13, DREB2,DREB2A, TG,WIND3, DIC2,UCP4	G1	0.758	GO:0071456, GO:0036294, GO:0071453, GO:0001666, GO:0036293, GO:0070482, GO:0010200, GO:0009409, GO:0009751, GO:0015994, GO:0042180, GO:0009644, GO:0009642, GO:0062012, GO:0042440, GO:0010565	cellular response to hypoxia, cellular response to decreased oxygen levels, cellular response to oxygen levels, response to hypoxia, response to decreased oxygen levels, response to oxygen levels, response to chitin, response to cold, response to salicylic acid, chlorophyll metabolic process, cellular ketone metabolic process, response to high light intensity, response to light intensity, regulat…	GO:0016209, GO:0004497, GO:0046906, GO:0004601, GO:0016684, GO:0016705, GO:0008509, GO:0020037, GO:0043531, GO:0016709, GO:0008266, GO:0015295, GO:0008187, GO:0008514, GO:1901682	antioxidant activity, monooxygenase activity, tetrapyrrole binding, peroxidase activity, oxidoreductase activity, acting on peroxide as acceptor, oxidoreductase activity, acting on paired donors, with incorporation or reduction of molecular oxygen, anion transmembrane transporter activity, heme binding, ADP binding, oxidoreductase activity, acting on paired donors, with incorporation or reduction…	GO:0048046, GO:0009534, GO:0031976, GO:0010319, GO:0042170, GO:0042651, GO:0034357, GO:0009535, GO:0055035, GO:0098807, GO:0000322, GO:0000326	apoplast, chloroplast thylakoid, plastid thylakoid, stromule, plastid membrane, thylakoid membrane, photosynthetic membrane, chloroplast thylakoid membrane, plastid thylakoid membrane, chloroplast thylakoid membrane protein complex, storage vacuole, protein storage vacuole	1038	1520	0.1463	0.843	0.0652	0.09208	-0.0429	-0.007436
10	Endosperm	CZE	10. CZE disaccharide metabolic (ARR21)	10. CZE disacc	20	120	AT2G18590, AT1G76290, AT1G68735, AT2G06020, AT2G27070, AT1G30110, AT5G46350, AT4G30590, AT5G53550, AT4G23270, AT4G35725, AT4G37950, AT1G70920, AT1G30710, AT1G15757	NA, NA, NA, NA, ARR13,RR13, ATNUDX25,NUDX25, ATWRKY8,WRKY8, AtENODL12,ENODL12, ATYSL3,YSL3, CRK19, NA, NA, ATHB18,HB18, AtBBE9, NA	G1	0.7	GO:0005984, GO:0007623, GO:0048511, GO:0005985, GO:0009311, GO:0005986, GO:0003008, GO:0003013, GO:0003018, GO:0010232, GO:0010233, GO:0008643, GO:0048825, GO:0045596, GO:0046351	disaccharide metabolic process, circadian rhythm, rhythmic process, sucrose metabolic process, oligosaccharide metabolic process, sucrose biosynthetic process, system process, circulatory system process, vascular process in circulatory system, vascular transport, phloem transport, carbohydrate transport, cotyledon development, negative regulation of cell differentiation, disaccharide biosynthetic…	GO:0015295, GO:0008324, GO:0022890, GO:0022853, GO:0015294, GO:0016705, GO:0015293	solute:proton symporter activity, cation transmembrane transporter activity, inorganic cation transmembrane transporter activity, active ion transmembrane transporter activity, solute:cation symporter activity, oxidoreductase activity, acting on paired donors, with incorporation or reduction of molecular oxygen, symporter activity	NA	NA	1342	2031	0.2478	1.144	0.03725	0.1161	-0.03816	-0.01187
13	Endosperm	PEN	13. PEN (ABS6)	13. PEN	4	1239	AT4G10640, AT4G29230, AT5G18310, AT5G07260, AT2G30590, AT5G65590, AT5G38170, AT1G15150, AT1G04380, AT3G11180, AT2G34315, AT2G22660, AT2G44470, AT5G07200, AT1G56170	ABS6,IQD16, anac075,NAC075,SND4, NA, NA, WRKY21, SCAP1, NA, NA, NA, JAO,JOX1, NA, AtGRDP1, BGLU29, ATGA20OX3,GA20OX3,YAP169, ATHAP5B,HAP5B,NF-YC2	G1	0.5206	GO:0043455, GO:0016051, GO:0034637, GO:0071456, GO:0036294, GO:0071453, GO:0001666, GO:0000271, GO:1902930, GO:0080036, GO:0036293, GO:0070482, GO:0042546, GO:0033692, GO:0019747	regulation of secondary metabolic process, carbohydrate biosynthetic process, cellular carbohydrate biosynthetic process, cellular response to hypoxia, cellular response to decreased oxygen levels, cellular response to oxygen levels, response to hypoxia, polysaccharide biosynthetic process, regulation of alcohol biosynthetic process, regulation of cytokinin-activated signaling pathway, response t…	GO:0019900	kinase binding	NA	NA	961.8	1407	0.2046	0.8936	0.01627	0.1796	-0.006572	-0.01097
14	Endosperm	PEN	14. PEN dehydrin enriched (ERD10)	14. PEN dehyd	16	161	AT2G42560, AT3G22540, AT1G06148, AT1G01470, AT1G20450, AT4G38410, AT1G08230, AT1G52690, AT3G17580, AT2G02120, AT1G60030, AT3G45730, AT3G57540, AT2G22080, AT5G40390	LEA25, NA, NA, AtLEA14,LEA1,LEA14,LSR3, ERD10,LTI29,LTI45, NA, NA, LEA7, NA, LCR70,PDF2.1, ATNAT7,NAT7, NA, AtREM4.1,REM4.1, NA, RS5,SIP1	G1	0.4907	GO:0009409, GO:0009631, GO:0034637, GO:0010115, GO:1902930, GO:0043455, GO:0009688, GO:0043289, GO:1902645, GO:0035970, GO:0009250, GO:0016051, GO:0010200, GO:0009408, GO:0007623, GO:0048511, GO:0033692, GO:0046890, GO:0009687, GO:0043288, GO:1902644	response to cold, cold acclimation, cellular carbohydrate biosynthetic process, regulation of abscisic acid biosynthetic process, regulation of alcohol biosynthetic process, regulation of secondary metabolic process, abscisic acid biosynthetic process, apocarotenoid biosynthetic process, tertiary alcohol biosynthetic process, peptidyl-threonine dephosphorylation, glucan biosynthetic process, carb…	NA	NA	NA	NA	943.8	1399	0.2128	1.028	0.01906	0.1569	-0.007287	-0.006769
15	Seed coat	CZSC	15. CZSC general (ARR22, SWEET10, and TET5)	15. CZSC general	11	497	AT3G60970, AT5G43180, AT2G38640, AT4G10120, AT3G48230, AT4G40010, AT2G39830, AT4G27420, AT5G49660, AT3G19550, AT1G60680, AT1G61660, AT1G43910, AT3G60160, AT3G04300	ABCC15,ATMRP15,MRP15, NA, NA, ATSPS4F,AtSPSC,SPS4F,SPSC, NA, SNRK2-7,SNRK2.7,SRK2F, DAR2,LRD3, ABCG9, CEPR1,XIP1, NA, NA, AtbHLH112,PFA4, NA, ABCC9,ATMRP9,MRP9, NA	G1	0.7445	GO:0035670, GO:0048481, GO:0031667, GO:0048440, GO:0034220, GO:0005984, GO:0009991, GO:0048467, GO:0042594, GO:0046351, GO:0009311, GO:0006820, GO:0009312, GO:0098660, GO:0006470, GO:0036293, GO:0010200, GO:0070482, GO:0048438	plant-type ovary development, plant ovule development, response to nutrient levels, carpel development, ion transmembrane transport, disaccharide metabolic process, response to extracellular stimulus, gynoecium development, response to starvation, disaccharide biosynthetic process, oligosaccharide metabolic process, anion transport, oligosaccharide biosynthetic process, inorganic ion transmembran…	GO:0042578, GO:0000987, GO:0019203, GO:0008559, GO:0016791, GO:0000981, GO:0004805, GO:0000978, GO:0005342, GO:0046943, GO:0019900, GO:0015662, GO:0140358, GO:0000977, GO:0004721	phosphoric ester hydrolase activity, cis-regulatory region sequence-specific DNA binding, carbohydrate phosphatase activity, ABC-type xenobiotic transporter activity, phosphatase activity, DNA-binding transcription factor activity, RNA polymerase II-specific, trehalose-phosphatase activity, RNA polymerase II cis-regulatory region sequence-specific DNA binding, organic acid transmembrane transport…	NA	NA	855.2	1267	0.327	0.839	0.009127	0.0968	-0.03344	-0.013
16	Seed coat	ii1	16. ii1 basal (contains pigment strand) (BAN and SWEET4)	16. ii1 basal cont PS	15	174	AT5G42800, AT5G17220, AT1G61720, AT2G47115, AT2G37180, AT1G56100, AT3G59010, AT2G42860, AT1G05260, AT1G20680, AT1G62480, AT5G24580, AT2G11810, AT3G04280, AT4G22880	DFR,M318,TT3, ATGSTF12,GST26,GSTF12,TT19, BAN, NA, PIP2;3,PIP2C,RD28, NA, PME35,PME61, NA, PER3,RCI3,RCI3A, NA, NA, AtHMP47,HIPP09, ATMGD3,MGD3,MGDC, ARR22,RR22, ANS,LDOX,TDS4,TT18	G1	0.7414	GO:0009698, GO:0036294, GO:0071453, GO:0048467, GO:0048440, GO:0048481, GO:0035670, GO:0071456, GO:0036293, GO:0070482, GO:0009699, GO:0006833, GO:0042044, GO:2000762, GO:0010214	phenylpropanoid metabolic process, cellular response to decreased oxygen levels, cellular response to oxygen levels, gynoecium development, carpel development, plant ovule development, plant-type ovary development, cellular response to hypoxia, response to decreased oxygen levels, response to oxygen levels, phenylpropanoid biosynthetic process, water transport, fluid transport, regulation of phen…	GO:0005372, GO:0015250, GO:0000981, GO:0000987, GO:0000978, GO:0000977	water transmembrane transporter activity, water channel activity, DNA-binding transcription factor activity, RNA polymerase II-specific, cis-regulatory region sequence-specific DNA binding, RNA polymerase II cis-regulatory region sequence-specific DNA binding, RNA polymerase II transcription regulatory region sequence-specific DNA binding	NA	NA	807.5	1179	0.3576	0.8142	0.01408	0.09389	-0.02753	-0.01478
17	Seed coat	ii1	17. ii1 endothelium (BAN and TT1)	17. ii1 endothel	17	159	AT2G24430, AT1G08810, AT2G38380, AT2G45840, AT4G27790, AT2G01670, AT5G01180, AT4G19370, AT3G22400, AT2G18360, AT1G08990, AT1G03103, AT1G22990, AT5G51950, AT5G24030	ANAC038,ANAC039,NAC038, AtMYB60,MYB60, NA, NA, NA, atnudt17,NUDT17, AtNPF8.2,ATPTR5,NPF8.2,PTR5, MWL-2, ATLOX5,LOX5, NA, GUX5,PGSIP5, LTPG19, AtHMP04,HIPP22, NA, SLAH3	G1	0.8176	GO:0006631, GO:0006633, GO:0000038, GO:0010200, GO:0072330, GO:0036293, GO:0070482, GO:0042594, GO:0010214, GO:0001666, GO:0042761, GO:0031667, GO:0048585, GO:0042335, GO:0009813	fatty acid metabolic process, fatty acid biosynthetic process, very long-chain fatty acid metabolic process, response to chitin, monocarboxylic acid biosynthetic process, response to decreased oxygen levels, response to oxygen levels, response to starvation, seed coat development, response to hypoxia, very long-chain fatty acid biosynthetic process, response to nutrient levels, negative regulatio…	GO:0102756, GO:0000987, GO:0000978, GO:0000981, GO:0008234, GO:0000977, GO:0004725	very-long-chain 3-ketoacyl-CoA synthase activity, cis-regulatory region sequence-specific DNA binding, RNA polymerase II cis-regulatory region sequence-specific DNA binding, DNA-binding transcription factor activity, RNA polymerase II-specific, cysteine-type peptidase activity, RNA polymerase II transcription regulatory region sequence-specific DNA binding, protein tyrosine phosphatase activity	GO:0000323, GO:0005764, GO:0009705, GO:0005774	lytic vacuole, lysosome, plant-type vacuole membrane, vacuolar membrane	942.5	1635	0.1835	0.6038	0.02548	0.06187	-0.04064	-0.01546
18	Seed coat	ii1'/ii2	18. ii1'/ii2 (DELTAVPE)	18. ii1'/ii2	14	278	AT1G31050, AT4G32810, AT3G21510, AT1G70680, AT1G09790, AT3G20210, AT5G23750, AT3G52780, AT5G64190, AT1G76160, AT3G07390, AT5G23660, AT5G55930, AT3G13672, AT4G20260	PFA1, ATCCD8,CCD8,MAX4, AHP1, NA, COBL6, AEP4,DELTA-VPE,DELTAVPE, NA, ATPAP20,PAP20, NA, sks5, AIR12, AtSWEET12,MTN3,SWEET12, ATOPT1,OPT1, SINA2,SINAT6, ATPCAP1,MDP25,PCAP1	G1	0.777	GO:0071215, GO:0097306, GO:0009738, GO:0010118, GO:0009966, GO:0010646, GO:0010214, GO:0080001, GO:0042594, GO:0023051, GO:0001676, GO:0048481, GO:0031667, GO:0035670, GO:0071398	cellular response to abscisic acid stimulus, cellular response to alcohol, abscisic acid-activated signaling pathway, stomatal movement, regulation of signal transduction, regulation of cell communication, seed coat development, mucilage extrusion from seed coat, response to starvation, regulation of signaling, long-chain fatty acid metabolic process, plant ovule development, response to nutrient…	NA	NA	GO:0000323, GO:0005764	lytic vacuole, lysosome	899.5	1377	0.2148	0.7989	0.009998	0.06338	-0.03701	-0.01691
19	Seed coat	oi1	19. oi1 flavinol synthesizing (MYB11)	19. oi1 flav synth	3	1263	AT3G62610, AT5G64900, AT2G43050, AT5G15180, AT1G78390, AT1G69523, AT1G70830, AT2G36950, AT5G24915, AT5G42235, AT4G26590, AT4G34138, AT1G73600, AT1G34580, AT2G38170	ATMYB11,MYB11,PFG2, ATPEP1,PEP1,PROPEP1, ATPMEPCRD, PRX56, ATNCED9,NCED9, NA, MLP28, AtHMP20, NA, NA, ATOPT5,OPT5, UGT73B1, AtPMT3,DEG26,NMT,NMT3, NA, ATCAX1,CAX1,RCI4	G1	0.6524	GO:0010214, GO:0010191, GO:1901615, GO:0010192, GO:0010200, GO:0042546, GO:1901617, GO:0009698, GO:0007568, GO:0009699, GO:0009813, GO:0009812, GO:0044264, GO:0009832, GO:0044550	seed coat development, mucilage metabolic process, organic hydroxy compound metabolic process, mucilage biosynthetic process, response to chitin, cell wall biogenesis, organic hydroxy compound biosynthetic process, phenylpropanoid metabolic process, aging, phenylpropanoid biosynthetic process, flavonoid biosynthetic process, flavonoid metabolic process, cellular polysaccharide metabolic process, …	GO:0052689, GO:0052793, GO:0004497, GO:0008194	carboxylic ester hydrolase activity, pectin acetylesterase activity, monooxygenase activity, UDP-glycosyltransferase activity	NA	NA	702.3	1027	0.3313	1.118	0.01002	0.08265	-0.02651	-0.008452
20	Seed coat	oi1	20. oi1 polyester monomer biosynthesis (MYB11 and CYP86B1)	20. oi1 flav synth polyester	6	831	AT3G22620, AT1G21320, AT2G48130, AT4G17280, AT3G22600, AT5G22270, AT2G40370, AT1G73290, AT4G36610, AT5G23190, AT5G41040, AT5G08250, AT4G24130, AT5G36185, AT1G17960	LTPG20, NSRb, LTPG15, NA, LTPG5, SIED1, LAC5, scpl5, NA, CYP86B1, ASFT,HHT,RWP1, NA, NA, NA, NA	G1	0.7533	GO:0010200, GO:0072330, GO:0071215, GO:0097306, GO:0009738, GO:0009698, GO:0006631, GO:0010214, GO:0098771, GO:0010025, GO:0010166, GO:0044550, GO:0009751, GO:0009699, GO:0050801, GO:1901568, GO:0006633, GO:1901570, GO:0006575, GO:2001057, GO:0009688, GO:0043289, GO:1902645	response to chitin, monocarboxylic acid biosynthetic process, cellular response to abscisic acid stimulus, cellular response to alcohol, abscisic acid-activated signaling pathway, phenylpropanoid metabolic process, fatty acid metabolic process, seed coat development, inorganic ion homeostasis, wax biosynthetic process, wax metabolic process, secondary metabolite biosynthetic process, response to …	GO:0052689, GO:0031406, GO:0015368, GO:0033293, GO:0008289, GO:0080030, GO:0004029, GO:0004030, GO:0008242, GO:0043177, GO:0050660, GO:0016289, GO:0043178, GO:0016405, GO:0019840	carboxylic ester hydrolase activity, carboxylic acid binding, calcium:cation antiporter activity, monocarboxylic acid binding, lipid binding, methyl indole-3-acetate esterase activity, aldehyde dehydrogenase (NAD+) activity, aldehyde dehydrogenase [NAD(P)+] activity, omega peptidase activity, organic acid binding, flavin adenine dinucleotide binding, CoA hydrolase activity, alcohol binding, CoA-l…	NA	NA	933.4	1467	0.2352	0.9212	0.0108	0.07441	-0.02984	-0.009842
21	Seed coat	oi2	21. oi2 general (GLABRA2)	21. oi2 gen	10	618	AT1G35625, AT5G66150, AT1G35630, AT1G77210, AT1G08483, AT1G19640, AT2G23550, AT5G42930, AT2G38890, AT1G31670, AT1G63140, AT1G13635, AT2G32430, AT3G56260, AT2G18260	NA, NA, RMR5, AtSTP14,STP14, NA, JMT, ABE1,ATMES6,MES6, NA, NA, NA, NA, NA, NA, NA, ATSYP112,SYP112	G1	0.644	GO:0010191, GO:0010214, GO:0010192, GO:0042546, GO:0009832, GO:0000271, GO:0016051, GO:0045489, GO:0009225, GO:0009226, GO:0044264, GO:0048359, GO:0033692, GO:0010383, GO:0044036	mucilage metabolic process, seed coat development, mucilage biosynthetic process, cell wall biogenesis, plant-type cell wall biogenesis, polysaccharide biosynthetic process, carbohydrate biosynthetic process, pectin biosynthetic process, nucleotide-sugar metabolic process, nucleotide-sugar biosynthetic process, cellular polysaccharide metabolic process, mucilage metabolic process involved in seed…	GO:0015020, GO:0008092, GO:0008194, GO:0016857, GO:0016758, GO:0008289, GO:0016854, GO:0003779, GO:0000146, GO:0005543, GO:0005319, GO:0051015, GO:0003774, GO:0047262, GO:0015662, GO:0140358	glucuronosyltransferase activity, cytoskeletal protein binding, UDP-glycosyltransferase activity, racemase and epimerase activity, acting on carbohydrates and derivatives, hexosyltransferase activity, lipid binding, racemase and epimerase activity, actin binding, microfilament motor activity, phospholipid binding, lipid transporter activity, actin filament binding, cytoskeletal motor activity, po…	GO:0031985, GO:0005795, GO:0098791, GO:0005802, GO:0005768, GO:0000138, GO:0005856, GO:0005797, GO:0030126, GO:0030663, GO:0030137, GO:0005874, GO:0099081, GO:0099512, GO:0099513	Golgi cisterna, Golgi stack, Golgi apparatus subcompartment, trans-Golgi network, endosome, Golgi trans cisterna, cytoskeleton, Golgi medial cisterna, COPI vesicle coat, COPI-coated vesicle membrane, COPI-coated vesicle, microtubule, supramolecular polymer, supramolecular fiber, polymeric cytoskeletal fiber	809.2	1291	0.3018	1.063	0.008968	0.08771	-0.0259	-0.004723
