# Supplementary material for: A transcriptional atlas of early Arabidopsis seed development suggests mechanisms for inter-tissue coordination
Source: Research Square preprint supplement (doi:10.21203/rs.3.rs-6560595/v1), 2025-05-16
Supplement: Supplementary file 4 [file 810a0f4401e35ef7ea762d98.xlsx]

## Sheet: S5_pseudotime_txn_factors
Supplementary Table 5. Transcription factors that are vary along 5 DAP PEN-CZE pseudotime
README
• This table contains all transcription factors that vary on PEN/CZE pseudotime described in Fig. 4
• The values and statistics for each gene were generated using graph_test in monocle3
• All arabidopsis transcription factors were accessed from the Plant Transcription Factor database: https://planttfdb.gao-lab.org/index.php?sp=Ath
graph_test output column descriptions:
gene - TAIR ID
status - the gene successfully completed the Moran's I test
p_value - calculated from the Moran's I test for spatial autocorrelation
morans_test_statistic - Moran's I statistic standard deviate
morans_I - a measure of autocorrelation of a gene's expression among nuclei that are proximal along a trajectory, varies from -1 (anticorrelated) +1 (perfectly correlated)
q_value - Benjamini-Hochberg adjusted p-value
Family - transcription factor family from the Plant Transcription Factor Database

## Sheet: Sheet1
	gene	status	p_value	morans_test_statistic	morans_I	q_value	Family
1	AT1G05230	OK	0	77.5783	0.346558	0	HD-ZIP
2	AT1G08320	OK	0	42.3236	0.188011	0	bZIP
3	AT1G08985	OK	0	58.7846	0.260309	0	B3
4	AT1G14350	OK	0	57.4314	0.257306	0	MYB
5	AT1G29600	OK	0	41.4827	0.159339	0	C3H
6	AT1G32540	OK	0	56.1503	0.252553	0	LSD
7	AT1G36060	OK	0	70.1922	0.315243	0	ERF
8	AT1G48195	OK	0	53.2838	0.237807	0	C3H
9	AT1G49190	OK	0	89.4266	0.400424	0	ARR-B
10	AT1G56170	OK	0	44.9795	0.202325	0	NF-YC
11	AT1G63100	OK	0	125.785	0.566007	0	GRAS
12	AT1G65300	OK	0	38.4235	0.170047	0	M-type_MADS
13	AT1G73360	OK	0	49.4787	0.221655	0	HD-ZIP
14	AT1G75390	OK	0	42.8498	0.192648	0	bZIP
15	AT2G15740	OK	0	90.2256	0.402359	0	C2H2
16	AT2G18490	OK	0	63.0702	0.281053	0	C2H2
17	AT2G20110	OK	0	47.1476	0.21089	0	CPP
18	AT2G26320	OK	0	156.148	0.699368	0	M-type_MADS
19	AT2G27070	OK	0	96.7125	0.426845	0	ARR-B
20	AT2G32370	OK	0	55.133	0.24805	0	HD-ZIP
21	AT2G32930	OK	0	83.3272	0.369807	0	C3H
22	AT2G33880	OK	0	52.2532	0.233262	0	WOX
23	AT2G36890	OK	0	45.3076	0.199895	0	MYB
24	AT2G46830	OK	0	64.1058	0.287888	0	MYB_related
25	AT3G03260	OK	0	141.782	0.635068	0	HD-ZIP
26	AT3G16770	OK	0	37.654	0.169297	0	ERF
27	AT3G18550	OK	0	111.373	0.499353	0	TCP
28	AT3G19290	OK	0	48.4654	0.21684	0	bZIP
29	AT3G19580	OK	0	41.9925	0.186748	0	C2H2
30	AT3G21810	OK	0	106.322	0.477145	0	C3H
31	AT3G25990	OK	0	73.4672	0.325519	0	Trihelix
32	AT3G45610	OK	0	45.7679	0.203659	0	Dof
33	AT3G54320	OK	0	41.7487	0.187805	0	AP2
34	AT3G54320	OK	0	41.7487	0.187805	0	ERF
35	AT3G56520	OK	0	58.6567	0.260072	0	NAC
36	AT3G56560	OK	0	55.8407	0.238022	0	NAC
37	AT3G57390	OK	0	61.7772	0.275999	0	MIKC_MADS
38	AT3G62340	OK	0	132.139	0.59066	0	WRKY
39	AT4G00730	OK	0	53.5754	0.240737	0	HD-ZIP
40	AT4G01500	OK	0	82.4104	0.368513	0	B3
41	AT4G04580	OK	0	72.6657	0.324368	0	G2-like
42	AT4G04890	OK	0	43.6529	0.194059	0	HD-ZIP
43	AT4G18020	OK	0	39.6608	0.178315	0	ARR-B
44	AT4G18870	OK	0	76.826	0.342337	0	HSF
45	AT4G21040	OK	0	111.473	0.499534	0	Dof
46	AT4G21080	OK	0	41.4282	0.184488	0	Dof
47	AT4G26640	OK	0	48.6607	0.218274	0	WRKY
48	AT4G29230	OK	0	110.92	0.494829	0	NAC
49	AT4G31550	OK	0	46.2039	0.207263	0	WRKY
50	AT4G31610	OK	0	55.0914	0.247362	0	B3
51	AT4G31800	OK	0	59.8195	0.266912	0	WRKY
52	AT4G36590	OK	0	95.98	0.427854	0	M-type_MADS
53	AT4G37740	OK	0	80.4079	0.358336	0	GRF
54	AT5G07210	OK	0	75.8076	0.338073	0	ARR-B
55	AT5G11510	OK	0	64.0028	0.287565	0	MYB
56	AT5G14960	OK	0	63.0521	0.279371	0	E2F/DP
57	AT5G17320	OK	0	45.0648	0.199114	0	HD-ZIP
58	AT5G17800	OK	0	46.5206	0.209244	0	MYB
59	AT5G23650	OK	0	78.5458	0.351338	0	MYB
60	AT5G42700	OK	0	63.3617	0.284232	0	B3
61	AT5G42910	OK	0	77.828	0.347179	0	bZIP
62	AT5G45980	OK	0	54.724	0.245452	0	WOX
63	AT5G46350	OK	0	79.9231	0.357619	0	WRKY
64	AT5G46880	OK	0	69.2704	0.311331	0	HD-ZIP
65	AT5G47140	OK	0	81.9504	0.366368	0	GATA
66	AT5G56200	OK	0	70.2402	0.313403	0	C2H2
67	AT5G62110	OK	0	44.4984	0.198132	0	G2-like
68	AT5G56620	OK	0	37.805	0.157229	0	NAC
69	AT1G55600	OK	2.16065923114336e-293	37.4588	0.10551	5.14796242929918e-293	WRKY
70	AT1G47760	OK	7.43337994515789e-293	37.0551	0.16474	1.74311502659847e-293	M-type_MADS
71	AT5G01380	OK	9.20077883727022e-288	36.233	0.160897	2.10072667195632e-286	Trihelix
72	AT1G64620	OK	2.35267669834932e-286	36.1435	0.161966	5.35401261768774e-285	Dof
73	AT2G19510	OK	9.44351608996174e-286	36.1051	0.139559	2.1443791994673e-284	LBD
74	AT1G14580	OK	7.92532977068999e-270	35.0757	0.157386	1.75742920288222e-268	C2H2
75	AT5G52830	OK	2.10264540908499e-269	35.0478	0.156029	4.6576170936068e-268	WRKY
76	AT1G68510	OK	1.90399636019622e-268	34.985	0.15727	4.204153321877e-267	LBD
77	AT3G66656	OK	1.44011913325292e-257	34.2621	0.151485	3.07225415093957e-256	M-type_MADS
78	AT3G05860	OK	1.59292019487214e-254	34.0571	0.150115	3.36714837940453e-253	M-type_MADS
79	AT4G00270	OK	7.94126110808185e-249	33.67	0.150746	1.64684178512565e-247	GeBP
80	AT2G24570	OK	1.49092343876915e-243	33.3078	0.149104	3.0373366823113e-242	WRKY
81	AT5G58280	OK	7.52114650171716e-241	33.1205	0.147621	1.52624241205577e-239	B3
82	AT5G07160	OK	3.7283140799338e-233	32.5817	0.146113	7.39970733421976e-232	bZIP
83	AT5G12840	OK	2.37656288168083e-232	32.5248	0.146012	4.70337849086215e-231	NF-YA
84	AT4G21750	OK	1.44903013955317e-229	32.3272	0.144737	2.84875490573779e-228	HD-ZIP
85	AT1G49770	OK	1.85544369335303e-227	32.1769	0.144544	3.61359820428306e-226	bHLH
86	AT4G24240	OK	3.07158598088833e-190	29.3962	0.131691	5.4699476371984e-189	WRKY
87	AT2G30590	OK	1.32565737985768e-185	29.0313	0.130453	2.32885755920944e-184	WRKY
88	AT3G26790	OK	5.42299809184822e-176	28.2596	0.126891	9.26094912236806e-175	B3
89	AT3G26744	OK	7.10150119176681e-176	28.2501	0.126967	1.21074774417008e-174	bHLH
90	AT5G26630	OK	1.37578948940933e-169	27.7336	0.123073	2.29666303207978e-168	M-type_MADS
91	AT4G09960	OK	3.9599986465326e-167	27.5289	0.121695	6.56318500779906e-166	MIKC_MADS
92	AT1G65330	OK	4.32074933888711e-160	26.9346	0.117992	7.02121767569156e-159	M-type_MADS
93	AT4G25610	OK	3.99235741751704e-155	26.5073	0.118925	6.38777186802726e-154	C2H2
94	AT2G06200	OK	5.50929924168859e-155	26.4952	0.118066	8.80133826629206e-154	GRF
95	AT3G27785	OK	8.20466888071758e-155	26.4802	0.119003	1.30972457957733e-153	MYB
96	AT5G13790	OK	6.81273223936798e-154	26.4002	0.11849	1.0850293306191e-152	MIKC_MADS
97	AT1G01530	OK	9.86429593099575e-154	26.3862	0.111463	1.56983439452725e-152	M-type_MADS
98	AT2G34710	OK	2.05882532301417e-151	26.1833	0.117543	3.2491325279738e-150	HD-ZIP
99	AT5G57390	OK	3.2470902862988e-151	26.1659	0.113951	5.1205062892354e-150	AP2
100	AT3G20750	OK	7.65766583944346e-151	26.1332	0.117436	1.20483698532847e-149	GATA
101	AT3G55980	OK	4.52978476394423e-138	24.9843	0.107969	6.87733745182773e-137	C3H
102	AT1G10120	OK	4.82212366273767e-132	24.4234	0.109302	7.21065220596287e-131	bHLH
103	AT1G54160	OK	2.41491637201398e-127	23.977	0.101709	3.5548662801055e-126	NF-YA
104	AT4G00220	OK	1.82689381568446e-122	23.5047	0.105348	2.63518664120921e-121	LBD
105	AT1G22190	OK	7.77599026664726e-119	23.1471	0.103527	1.10705405575813e-117	ERF
106	AT5G50480	OK	1.03975692528651e-116	22.935	0.100064	1.47122068339859e-115	NF-YC
107	AT4G25530	OK	1.2360616742923e-111	22.4207	0.100661	1.69815606507793e-110	HD-ZIP
