# Supplementary material for: A transcriptional atlas of early Arabidopsis seed development suggests mechanisms for inter-tissue coordination
Source: Research Square preprint supplement (doi:10.21203/rs.3.rs-6560595/v1), 2025-05-16
Supplement: Supplementary file 5 [file 89c1784148022dda044b45f1.xlsx]

## Sheet: README
Supplementary Table 6. Student’s T-test results for all GSEA in this study
README
• This table contains the results of all statistical analyses of GSEA scores described in this study. Please see the methods section for details about how statistical tests were performed
Column descriptions:
cluster - focal cluster being tested for enrichment vs. all other clusters
comparison - cell types being compared, all tests were performed pairwise in a focal cluster vs. all analyses. Some tests were performed within timepoint datasets ("vs. 3 DAP") or within the full atlas dataset ("vs. all")
dataset - The dataset in which the test is being performed
annotation level - the annotation level of the focal cluster
module - the gene set or GO term underlying the GSEA module scores
pval - raw p-value from Student's T-test
pval_BH_adj - Benjamini Hochberg-corrected p-value
mean_group1 -the mean module score of all nuclei within the focal cluster
mean_group2 - the mean module score of all nuclei outside of the focal cluster
code - shorthand significance code for figures (“*” = p-value <= 0.05,“**” = p-value <= 0.01, “***” = p-value <= 0.001, and “****” = p-value <= 0.0001 for all figures)
pos_neg - whether the focal cluster showed positive or negative average enrichment relative to the comparison group
figure - the figure displaying the results of this test

## Sheet: module score statistics
cluster	comparison	dataset	annotation level	module	pval	mean_group1	mean_group2	pval_BH_adj	code	pos_neg	figure
3DAP 24. oi1 micropylar (SWEET12)	3DAP 24. oi1 micropylar (SWEET12) vs. all	ATLAS	level_3_annotation_full_timed	Brassino_biosyn_GO0016132_modsc	8.4940489668532e-6	0.191706	-0.0131506	6.625358194145496e-4	***	pos	3
5DAP 3. CZE apical cyst (MEE56)	5DAP 3. CZE apical cyst (MEE56) vs. all	ATLAS	level_3_annotation_full_timed	Brassino_biosyn_GO0016132_modsc	4.76055473359128e-5	-0.141058	-0.01095	0.00163717	**	neg	3
7DAP 12. MCE_ESR sheath promoting (ZOU, RGP3 and KRS)	7DAP 12. MCE_ESR sheath promoting (ZOU, RGP3 and KRS) vs. all	ATLAS	level_3_annotation_full_timed	Brassino_biosyn_GO0016132_modsc	8.38793134429764e-5	0.125649	-0.0135629	0.00163717	**	pos	3
3DAP 16. CZSC placentochalazal callose-synthesizing (ARR22, TET5, and CALS8)	3DAP 16. CZSC placentochalazal callose-synthesizing (ARR22, TET5, and CALS8) vs. all	ATLAS	level_3_annotation_full_timed	Brassino_biosyn_GO0016132_modsc	9.25004231763057e-5	-0.135962	-0.010704	0.00163717	**	neg	3
5DAP 16. CZSC placentochalazal callose-synthesizing (ARR22, TET5, and CALS8)	5DAP 16. CZSC placentochalazal callose-synthesizing (ARR22, TET5, and CALS8) vs. all	ATLAS	level_3_annotation_full_timed	Brassino_biosyn_GO0016132_modsc	1.1540451851653e-4	-0.125214	-0.0111177	0.00163717	**	neg	3
3DAP 20. ii2 general (DELTAVPE and STK)	3DAP 20. ii2 general (DELTAVPE and STK) vs. all	ATLAS	level_3_annotation_full_timed	Brassino_biosyn_GO0016132_modsc	1.3757193799805e-4	0.0913679	-0.0140411	0.00163717	**	pos	3
3DAP 7. PEN G2/M-phase (AGL62 and TOPII)	3DAP 7. PEN G2/M-phase (AGL62 and TOPII) vs. all	ATLAS	level_3_annotation_full_timed	Brassino_biosyn_GO0016132_modsc	1.4692541958754e-4	-0.130177	-0.0110141	0.00163717	**	neg	3
7DAP 4. EMB vascular primordium (SHR)	7DAP 4. EMB vascular primordium (SHR) vs. all	ATLAS	level_3_annotation_full_timed	Brassino_biosyn_GO0016132_modsc	1.7094026063024e-4	0.0876409	-0.0126723	0.00166667	**	pos	3
3DAP 12. CPT transient nucellus (PLL24)	3DAP 12. CPT transient nucellus (PLL24) vs. all	ATLAS	level_3_annotation_full_timed	Brassino_biosyn_GO0016132_modsc	2.1552012039515e-4	0.10198	-0.0117247	0.00186784	**	pos	3
3DAP 6. PEN general (AGL62)	3DAP 6. PEN general (AGL62) vs. all	ATLAS	level_3_annotation_full_timed	Brassino_biosyn_GO0016132_modsc	2.7450012797737e-4	-0.120056	-0.00973429	0.00204769	**	neg	3
3DAP 27. oi2 general (GLABRA2 and WRKY40)	3DAP 27. oi2 general (GLABRA2 and WRKY40) vs. all	ATLAS	level_3_annotation_full_timed	Brassino_biosyn_GO0016132_modsc	3.2449683369341e-4	0.0816234	-0.0120099	0.00204769	**	pos	3
3DAP 5. MCE (ARF13)	3DAP 5. MCE (ARF13) vs. all	ATLAS	level_3_annotation_full_timed	Brassino_biosyn_GO0016132_modsc	3.3548594311424e-4	-0.116269	-0.0101384	0.00204769	**	neg	3
3DAP 2. CZE nodule-like (MEA)	3DAP 2. CZE nodule-like (MEA) vs. all	ATLAS	level_3_annotation_full_timed	Brassino_biosyn_GO0016132_modsc	3.4128095378149e-4	-0.110851	-0.0110661	0.00204769	**	neg	3
3DAP 4. CZE nodule (CYCD4;2)	3DAP 4. CZE nodule (CYCD4;2) vs. all	ATLAS	level_3_annotation_full_timed	Brassino_biosyn_GO0016132_modsc	3.7490448312123e-4	-0.102726	-0.011145	0.00208875	**	neg	3
3DAP 15. CZSC placentochalazal phosphate transport (ARR22, SWEET10, and UMAMIT14)	3DAP 15. CZSC placentochalazal phosphate transport (ARR22, SWEET10, and UMAMIT14) vs. all	ATLAS	level_3_annotation_full_timed	Brassino_biosyn_GO0016132_modsc	4.0287435237178e-4	-0.101927	-0.0106513	0.00209495	**	neg	3
3DAP 19. ii1' (DELTAVPE and UMAMIT29)	3DAP 19. ii1' (DELTAVPE and UMAMIT29) vs. all	ATLAS	level_3_annotation_full_timed	Brassino_biosyn_GO0016132_modsc	4.6826474821612e-4	-0.101823	-0.00999297	0.00223923	**	neg	3
5DAP 2. CZE nodule-like (MEA)	5DAP 2. CZE nodule-like (MEA) vs. all	ATLAS	level_3_annotation_full_timed	Brassino_biosyn_GO0016132_modsc	4.8803807042939e-4	-0.106517	-0.0110412	0.00223923	**	neg	3
5DAP 18. ii1 endothelium (BAN and TT1)	5DAP 18. ii1 endothelium (BAN and TT1) vs. all	ATLAS	level_3_annotation_full_timed	Brassino_biosyn_GO0016132_modsc	5.2226148594733e-4	-0.104452	-0.0110672	0.00226313	**	neg	3
3DAP 13. CPT persistent nucellus (AGO3)	3DAP 13. CPT persistent nucellus (AGO3) vs. all	ATLAS	level_3_annotation_full_timed	Brassino_biosyn_GO0016132_modsc	6.852492718038e-4	-0.0984921	-0.0108621	0.00281313	**	neg	3
5DAP 20. ii2 general (DELTAVPE and STK)	5DAP 20. ii2 general (DELTAVPE and STK) vs. all	ATLAS	level_3_annotation_full_timed	Brassino_biosyn_GO0016132_modsc	7.8819805551529e-4	0.113768	-0.0137009	0.00307397	**	pos	3
5DAP 8. PEN G2M-phase (MAD2)	5DAP 8. PEN G2M-phase (MAD2) vs. all	ATLAS	level_3_annotation_full_timed	Brassino_biosyn_GO0016132_modsc	9.2714796204735e-4	-0.0898504	-0.010287	0.00327146	**	neg	3
5DAP 19. ii1' (DELTAVPE and UMAMIT29)	5DAP 19. ii1' (DELTAVPE and UMAMIT29) vs. all	ATLAS	level_3_annotation_full_timed	Brassino_biosyn_GO0016132_modsc	9.5812926234114e-4	-0.0860899	-0.0109798	0.00327146	**	neg	3
7DAP 21. oi2 general (GLABRA2)	7DAP 21. oi2 general (GLABRA2) vs. all	ATLAS	level_3_annotation_full_timed	Brassino_biosyn_GO0016132_modsc	9.8561903453609e-4	-0.0961782	-0.00994102	0.00327146	**	neg	3
3DAP 25. oi2 general (GLABRA2)	3DAP 25. oi2 general (GLABRA2) vs. all	ATLAS	level_3_annotation_full_timed	Brassino_biosyn_GO0016132_modsc	0.0010472	0.0669386	-0.0133105	0.00327146	**	pos	3
7DAP 6. EMB cortical initials (JKD)	7DAP 6. EMB cortical initials (JKD) vs. all	ATLAS	level_3_annotation_full_timed	Brassino_biosyn_GO0016132_modsc	0.00104937	0.0683673	-0.0118677	0.00327146	**	pos	3
5DAP 5. CZE nodule (CYCD4;2)	5DAP 5. CZE nodule (CYCD4;2) vs. all	ATLAS	level_3_annotation_full_timed	Brassino_biosyn_GO0016132_modsc	0.00109049	-0.113753	-0.011106	0.00327146	**	neg	3
3DAP 3. CZE basal cyst (RALFL3)	3DAP 3. CZE basal cyst (RALFL3) vs. all	ATLAS	level_3_annotation_full_timed	Brassino_biosyn_GO0016132_modsc	0.00131133	-0.114413	-0.0112514	0.0037883	**	neg	3
7DAP 16. ii1 basal (contains pigment strand) (BAN and SWEET4)	7DAP 16. ii1 basal (contains pigment strand) (BAN and SWEET4) vs. all	ATLAS	level_3_annotation_full_timed	Brassino_biosyn_GO0016132_modsc	0.00219706	-0.0777975	-0.0110274	0.00596307	**	neg	3
5DAP 12. PEN general IV (TGA9)	5DAP 12. PEN general IV (TGA9) vs. all	ATLAS	level_3_annotation_full_timed	Brassino_biosyn_GO0016132_modsc	0.00221704	-0.0938474	-0.0111224	0.00596307	**	neg	3
7DAP 11. MCE_ESR high PCD (ZOU and NAC074)	7DAP 11. MCE_ESR high PCD (ZOU and NAC074) vs. all	ATLAS	level_3_annotation_full_timed	Brassino_biosyn_GO0016132_modsc	0.00234281	0.0564818	-0.0128709	0.00604082	**	pos	3
3DAP 17. ii1 endothelium (BAN and TT1)	3DAP 17. ii1 endothelium (BAN and TT1) vs. all	ATLAS	level_3_annotation_full_timed	Brassino_biosyn_GO0016132_modsc	0.00240084	-0.0800065	-0.00835976	0.00604082	**	neg	3
7DAP 5. EMB ground tissue initials (JKD, SCR)	7DAP 5. EMB ground tissue initials (JKD, SCR) vs. all	ATLAS	level_3_annotation_full_timed	Brassino_biosyn_GO0016132_modsc	0.00271314	0.0618549	-0.0119833	0.00661327	**	pos	3
5DAP 17. ii1 basal (contains pigment strand) (BAN and ARR22)	5DAP 17. ii1 basal (contains pigment strand) (BAN and ARR22) vs. all	ATLAS	level_3_annotation_full_timed	Brassino_biosyn_GO0016132_modsc	0.00368742	-0.0689105	-0.0110851	0.00871571	**	neg	3
5DAP 24. oi1 micropylar (SWEET12)	5DAP 24. oi1 micropylar (SWEET12) vs. all	ATLAS	level_3_annotation_full_timed	Brassino_biosyn_GO0016132_modsc	0.00403422	0.100594	-0.0120506	0.00898211	**	pos	3
7DAP 17. ii1 endothelium (BAN and TT1)	7DAP 17. ii1 endothelium (BAN and TT1) vs. all	ATLAS	level_3_annotation_full_timed	Brassino_biosyn_GO0016132_modsc	0.0040718	-0.0893838	-0.0110124	0.00898211	**	neg	3
3DAP 18. ii1 basal (contains pigment strand) (BAN and SWEET4)	3DAP 18. ii1 basal (contains pigment strand) (BAN and SWEET4) vs. all	ATLAS	level_3_annotation_full_timed	Brassino_biosyn_GO0016132_modsc	0.00414559	-0.0695011	-0.010578	0.00898211	**	neg	3
3DAP 22. oi1 flavinol synthesizing high PCD (MYB11, SCOOP15, BAP1)	3DAP 22. oi1 flavinol synthesizing high PCD (MYB11, SCOOP15, BAP1) vs. all	ATLAS	level_3_annotation_full_timed	Brassino_biosyn_GO0016132_modsc	0.0061574	0.0430385	-0.0126114	0.0129805	*	pos	3
7DAP 2. EMB protoderm (PDF1)	7DAP 2. EMB protoderm (PDF1) vs. all	ATLAS	level_3_annotation_full_timed	Brassino_biosyn_GO0016132_modsc	0.00715159	0.042977	-0.0131044	0.0146796	*	pos	3
5DAP 10. PEN general V (PTR3)	5DAP 10. PEN general V (PTR3) vs. all	ATLAS	level_3_annotation_full_timed	Brassino_biosyn_GO0016132_modsc	0.00833823	-0.077003	-0.0107021	0.0166765	*	neg	3
7DAP 8. CZE photosynthetic (GA3OX4)	7DAP 8. CZE photosynthetic (GA3OX4) vs. all	ATLAS	level_3_annotation_full_timed	Brassino_biosyn_GO0016132_modsc	0.00944427	-0.0694859	-0.008248	0.0182672	*	neg	3
3DAP 10. FUN companion cells (SUC2)	3DAP 10. FUN companion cells (SUC2) vs. all	ATLAS	level_3_annotation_full_timed	Brassino_biosyn_GO0016132_modsc	0.00960196	-0.0718354	-0.0113161	0.0182672	*	neg	3
5DAP 11. PEN S-phase (HMGB6)	5DAP 11. PEN S-phase (HMGB6) vs. all	ATLAS	level_3_annotation_full_timed	Brassino_biosyn_GO0016132_modsc	0.0128905	-0.0624101	-0.0110223	0.0234163	*	neg	3
7DAP 10. CZE disaccharide metabolic (ARR21)	7DAP 10. CZE disaccharide metabolic (ARR21) vs. all	ATLAS	level_3_annotation_full_timed	Brassino_biosyn_GO0016132_modsc	0.012909	-0.0566749	-0.0112148	0.0234163	*	neg	3
5DAP 14. CPT apical persistent nucellus (AGO3)	5DAP 14. CPT apical persistent nucellus (AGO3) vs. all	ATLAS	level_3_annotation_full_timed	Brassino_biosyn_GO0016132_modsc	0.0187198	-0.0602044	-0.0111608	0.0331851	*	neg	3
7DAP 1. EMB inner cotyledon (XYL4)	7DAP 1. EMB inner cotyledon (XYL4) vs. all	ATLAS	level_3_annotation_full_timed	Brassino_biosyn_GO0016132_modsc	0.0283059	0.0230672	-0.0122279	0.0490636	*	pos	3
3DAP 11. OVL scenescing (BFN1)	3DAP 11. OVL scenescing (BFN1) vs. all	ATLAS	level_3_annotation_full_timed	Brassino_biosyn_GO0016132_modsc	0.0290668	-0.054373	-0.0111947	0.0492872	*	neg	3
5DAP 25. oi1 S-phase (MYB11 and TSO2)	5DAP 25. oi1 S-phase (MYB11 and TSO2) vs. all	ATLAS	level_3_annotation_full_timed	Brassino_biosyn_GO0016132_modsc	0.0297252	-0.0478766	-0.0112969	0.0493311	*	neg	3
7DAP 7. EMB hypophysis (SMB)	7DAP 7. EMB hypophysis (SMB) vs. all	ATLAS	level_3_annotation_full_timed	Brassino_biosyn_GO0016132_modsc	0.0360026	0.0499533	-0.0115988	0.0579042	n.s. 0.1	pos	3
7DAP 15. CZSC general (ARR22, SWEET10, and TET5)	7DAP 15. CZSC general (ARR22, SWEET10, and TET5) vs. all	ATLAS	level_3_annotation_full_timed	Brassino_biosyn_GO0016132_modsc	0.0363757	-0.0459564	-0.0108097	0.0579042	n.s. 0.1	neg	3
7DAP 14. PEN dehydrin enriched (ERD10)	7DAP 14. PEN dehydrin enriched (ERD10) vs. all	ATLAS	level_3_annotation_full_timed	Brassino_biosyn_GO0016132_modsc	0.0453071	-0.0522403	-0.011159	0.070026	n.s. 0.1	neg	3
5DAP 7. PEN general I (IMK2)	5DAP 7. PEN general I (IMK2) vs. all	ATLAS	level_3_annotation_full_timed	Brassino_biosyn_GO0016132_modsc	0.0457863	-0.0492463	-0.0107388	0.070026	n.s. 0.1	neg	3
3DAP 9. FUN epidermal (CER3)	3DAP 9. FUN epidermal (CER3) vs. all	ATLAS	level_3_annotation_full_timed	Brassino_biosyn_GO0016132_modsc	0.0469716	0.0264373	-0.0114404	0.0704574	n.s. 0.1	pos	3
3DAP 28. oi2 S-phase (GLABRA2 and BARD1)	3DAP 28. oi2 S-phase (GLABRA2 and BARD1) vs. all	ATLAS	level_3_annotation_full_timed	Brassino_biosyn_GO0016132_modsc	0.0504307	0.0259591	-0.0115409	0.0742187	n.s. 0.1	pos	3
3DAP 26. oi2 very long chain fatty acid-synthesizing (KCS6 and WRI4)	3DAP 26. oi2 very long chain fatty acid-synthesizing (KCS6 and WRI4) vs. all	ATLAS	level_3_annotation_full_timed	Brassino_biosyn_GO0016132_modsc	0.060005	0.0182493	-0.0116568	0.0866739	n.s. 0.1	pos	3
3DAP 21. oi1 flavinol synthesizing (MYB11)	3DAP 21. oi1 flavinol synthesizing (MYB11) vs. all	ATLAS	level_3_annotation_full_timed	Brassino_biosyn_GO0016132_modsc	0.0648765	0.0175619	-0.013448	0.0920067	n.s. 0.1	pos	3
5DAP 9. PEN general II (NAC075)	5DAP 9. PEN general II (NAC075) vs. all	ATLAS	level_3_annotation_full_timed	Brassino_biosyn_GO0016132_modsc	0.06939	-0.0405469	-0.0113105	0.0964429	n.s. 0.1	neg	3
7DAP 9. CZE LEA-enriched (ABR)	7DAP 9. CZE LEA-enriched (ABR) vs. all	ATLAS	level_3_annotation_full_timed	Brassino_biosyn_GO0016132_modsc	0.0704775	-0.0471297	-0.0109615	0.0964429	n.s. 0.1	neg	3
3DAP 8. FUN hilum (ADPG1)	3DAP 8. FUN hilum (ADPG1) vs. all	ATLAS	level_3_annotation_full_timed	Brassino_biosyn_GO0016132_modsc	0.0719326	-0.0389911	-0.0111874	0.0967369	n.s. 0.1	neg	3
5DAP 15. CZSC placentochalazal phosphate transport (ARR22, SWEET10, and UMAMIT14)	5DAP 15. CZSC placentochalazal phosphate transport (ARR22, SWEET10, and UMAMIT14) vs. all	ATLAS	level_3_annotation_full_timed	Brassino_biosyn_GO0016132_modsc	0.0881667	-0.0378068	-0.0112549	0.11655940931359075	n.s.	neg	3
5DAP 29. oi2 S-phase (GLABRA2, TSO2)	5DAP 29. oi2 S-phase (GLABRA2, TSO2) vs. all	ATLAS	level_3_annotation_full_timed	Brassino_biosyn_GO0016132_modsc	0.109806	-0.0429575	-0.0113525	0.14274759529806752	n.s.	neg	3
3DAP 14. CZSC fluid transport (ARR22 and AAP6)	3DAP 14. CZSC fluid transport (ARR22 and AAP6) vs. all	ATLAS	level_3_annotation_full_timed	Brassino_biosyn_GO0016132_modsc	0.119372	0.015828	-0.0115923	0.15263939622715988	n.s.	pos	3
5DAP 1. EMB (PDF1)	5DAP 1. EMB (PDF1) vs. all	ATLAS	level_3_annotation_full_timed	Brassino_biosyn_GO0016132_modsc	0.167896	-0.0337154	-0.0113555	0.2112235538527467	n.s.	neg	3
5DAP 6. MCE (ALE1)	5DAP 6. MCE (ALE1) vs. all	ATLAS	level_3_annotation_full_timed	Brassino_biosyn_GO0016132_modsc	0.213833	-0.0389749	-0.0113538	0.26474592447633327	n.s.	neg	3
5DAP 22. oi1 basal (MYB11 and PIN3)	5DAP 22. oi1 basal (MYB11 and PIN3) vs. all	ATLAS	level_3_annotation_full_timed	Brassino_biosyn_GO0016132_modsc	0.229871	0.00907318	-0.01236	0.2801557070347145	n.s.	pos	3
7DAP 19. oi1 flavinol synthesizing (MYB11)	7DAP 19. oi1 flavinol synthesizing (MYB11) vs. all	ATLAS	level_3_annotation_full_timed	Brassino_biosyn_GO0016132_modsc	0.23696	-0.028672	-0.0104403	0.2843518711051608	n.s.	neg	3
5DAP 28. oi2 very long chain fatty acid-synthesizing (KCS6 and WRI4)	5DAP 28. oi2 very long chain fatty acid-synthesizing (KCS6 and WRI4) vs. all	ATLAS	level_3_annotation_full_timed	Brassino_biosyn_GO0016132_modsc	0.240716	-0.0310998	-0.0113164	0.28448202532225036	n.s.	neg	3
3DAP 23. oi1 flavinol synthesizing S-phase (MYB11 and BARD1)	3DAP 23. oi1 flavinol synthesizing S-phase (MYB11 and BARD1) vs. all	ATLAS	level_3_annotation_full_timed	Brassino_biosyn_GO0016132_modsc	0.356683	0.00257268	-0.0114441	0.4152423275653509	n.s.	pos	3
5DAP 4. CZE basal cyst (RALFL3)	5DAP 4. CZE basal cyst (RALFL3) vs. all	ATLAS	level_3_annotation_full_timed	Brassino_biosyn_GO0016132_modsc	0.370916	-0.0238099	-0.0113655	0.42546209577589056	n.s.	neg	3
7DAP 13. PEN (ABS6)	7DAP 13. PEN (ABS6) vs. all	ATLAS	level_3_annotation_full_timed	Brassino_biosyn_GO0016132_modsc	0.438306	-0.0236121	-0.0105916	0.49465222757819033	n.s.	neg	3
7DAP 3. EMB dividing (MAD2, HMGB6)	7DAP 3. EMB dividing (MAD2, HMGB6) vs. all	ATLAS	level_3_annotation_full_timed	Brassino_biosyn_GO0016132_modsc	0.443919	-0.021734	-0.0109489	0.49465222757819033	n.s.	neg	3
3DAP 1. EMB (PDF1)	3DAP 1. EMB (PDF1) vs. all	ATLAS	level_3_annotation_full_timed	Brassino_biosyn_GO0016132_modsc	0.473372	-0.0220298	-0.0112857	0.5200423903946887	n.s.	neg	3
7DAP 20. oi1 polyester monomer biosynthesis (MYB11 and CYP86B1)	7DAP 20. oi1 polyester monomer biosynthesis (MYB11 and CYP86B1) vs. all	ATLAS	level_3_annotation_full_timed	Brassino_biosyn_GO0016132_modsc	0.550025	-0.0205065	-0.0109353	0.5958607723876416	n.s.	neg	3
5DAP 13. FUN epidermal (CER3)	5DAP 13. FUN epidermal (CER3) vs. all	ATLAS	level_3_annotation_full_timed	Brassino_biosyn_GO0016132_modsc	0.583146	-0.023125	-0.0113539	0.6230873636623655	n.s.	neg	3
5DAP 21. oi1 flavinol synthesizing (MYB11)	5DAP 21. oi1 flavinol synthesizing (MYB11) vs. all	ATLAS	level_3_annotation_full_timed	Brassino_biosyn_GO0016132_modsc	0.637694	-0.0194612	-0.0121494	0.6721639523449605	n.s.	neg	3
5DAP 27. oi2 general (GLABRA2)	5DAP 27. oi2 general (GLABRA2) vs. all	ATLAS	level_3_annotation_full_timed	Brassino_biosyn_GO0016132_modsc	0.663062	-0.0191186	-0.0116119	0.689584	n.s.	neg	3
5DAP 23. oi1 flavinol synthesizing high PCD (MYB11, SCOOP15, BAP1)	5DAP 23. oi1 flavinol synthesizing high PCD (MYB11, SCOOP15, BAP1) vs. all	ATLAS	level_3_annotation_full_timed	Brassino_biosyn_GO0016132_modsc	0.721608	-0.00590724	-0.01171	0.7405979579311139	n.s.	pos	3
5DAP 26. oi2 LTP-enriched (LTP1)	5DAP 26. oi2 LTP-enriched (LTP1) vs. all	ATLAS	level_3_annotation_full_timed	Brassino_biosyn_GO0016132_modsc	0.782018	-0.0154645	-0.0116653	0.7921736159021423	n.s.	neg	3
7DAP 18. ii1'/ii2 (DELTAVPE)	7DAP 18. ii1'/ii2 (DELTAVPE) vs. all	ATLAS	level_3_annotation_full_timed	Brassino_biosyn_GO0016132_modsc	0.839693	-0.0139806	-0.0112703	0.839693	n.s.	neg	3
3DAP 24. oi1 micropylar (SWEET12)	3DAP 24. oi1 micropylar (SWEET12) vs. all	ATLAS	level_3_annotation_full_timed	Brassino_homeo_GO0010268_modsc	1.4180619183201e-5	0.311978	-0.0199277	0.00110609	**	pos	3
3DAP 12. CPT transient nucellus (PLL24)	3DAP 12. CPT transient nucellus (PLL24) vs. all	ATLAS	level_3_annotation_full_timed	Brassino_homeo_GO0010268_modsc	2.94069026096472e-5	0.276957	-0.0181646	0.00114687	**	pos	3
5DAP 24. oi1 micropylar (SWEET12)	5DAP 24. oi1 micropylar (SWEET12) vs. all	ATLAS	level_3_annotation_full_timed	Brassino_homeo_GO0010268_modsc	0.00111665	0.244581	-0.0186653	0.0290328	*	pos	3
5DAP 3. CZE apical cyst (MEE56)	5DAP 3. CZE apical cyst (MEE56) vs. all	ATLAS	level_3_annotation_full_timed	Brassino_homeo_GO0010268_modsc	0.00158137	-0.164261	-0.0167524	0.0308367	*	neg	3
5DAP 8. PEN G2M-phase (MAD2)	5DAP 8. PEN G2M-phase (MAD2) vs. all	ATLAS	level_3_annotation_full_timed	Brassino_homeo_GO0010268_modsc	0.00273117	-0.148149	-0.0149247	0.0426063	*	neg	3
5DAP 10. PEN general V (PTR3)	5DAP 10. PEN general V (PTR3) vs. all	ATLAS	level_3_annotation_full_timed	Brassino_homeo_GO0010268_modsc	0.00381159	-0.142727	-0.0154683	0.0455277	*	neg	3
5DAP 12. PEN general IV (TGA9)	5DAP 12. PEN general IV (TGA9) vs. all	ATLAS	level_3_annotation_full_timed	Brassino_homeo_GO0010268_modsc	0.00556761	-0.134733	-0.0168096	0.0455277	*	neg	3
3DAP 7. PEN G2/M-phase (AGL62 and TOPII)	3DAP 7. PEN G2/M-phase (AGL62 and TOPII) vs. all	ATLAS	level_3_annotation_full_timed	Brassino_homeo_GO0010268_modsc	0.00606585	-0.130767	-0.0168719	0.0455277	*	neg	3
3DAP 22. oi1 flavinol synthesizing high PCD (MYB11, SCOOP15, BAP1)	3DAP 22. oi1 flavinol synthesizing high PCD (MYB11, SCOOP15, BAP1) vs. all	ATLAS	level_3_annotation_full_timed	Brassino_homeo_GO0010268_modsc	0.0064358	0.0917957	-0.0191465	0.0455277	*	pos	3
5DAP 11. PEN S-phase (HMGB6)	5DAP 11. PEN S-phase (HMGB6) vs. all	ATLAS	level_3_annotation_full_timed	Brassino_homeo_GO0010268_modsc	0.00656776	-0.128104	-0.0159901	0.0455277	*	neg	3
5DAP 7. PEN general I (IMK2)	5DAP 7. PEN general I (IMK2) vs. all	ATLAS	level_3_annotation_full_timed	Brassino_homeo_GO0010268_modsc	0.00665307	-0.132294	-0.0137472	0.0455277	*	neg	3
5DAP 6. MCE (ALE1)	5DAP 6. MCE (ALE1) vs. all	ATLAS	level_3_annotation_full_timed	Brassino_homeo_GO0010268_modsc	0.00797399	-0.127918	-0.0162222	0.0455277	*	neg	3
7DAP 8. CZE photosynthetic (GA3OX4)	7DAP 8. CZE photosynthetic (GA3OX4) vs. all	ATLAS	level_3_annotation_full_timed	Brassino_homeo_GO0010268_modsc	0.00833287	-0.112396	-0.0146406	0.0455277	*	neg	3
5DAP 5. CZE nodule (CYCD4;2)	5DAP 5. CZE nodule (CYCD4;2) vs. all	ATLAS	level_3_annotation_full_timed	Brassino_homeo_GO0010268_modsc	0.00869117	-0.122647	-0.0169028	0.0455277	*	neg	3
3DAP 14. CZSC fluid transport (ARR22 and AAP6)	3DAP 14. CZSC fluid transport (ARR22 and AAP6) vs. all	ATLAS	level_3_annotation_full_timed	Brassino_homeo_GO0010268_modsc	0.00875533	0.0894586	-0.0180512	0.0455277	*	pos	3
3DAP 21. oi1 flavinol synthesizing (MYB11)	3DAP 21. oi1 flavinol synthesizing (MYB11) vs. all	ATLAS	level_3_annotation_full_timed	Brassino_homeo_GO0010268_modsc	0.0105957	0.0678749	-0.0216322	0.0497306	*	pos	3
3DAP 6. PEN general (AGL62)	3DAP 6. PEN general (AGL62) vs. all	ATLAS	level_3_annotation_full_timed	Brassino_homeo_GO0010268_modsc	0.0108387	-0.12261	-0.0152468	0.0497306	*	neg	3
5DAP 20. ii2 general (DELTAVPE and STK)	5DAP 20. ii2 general (DELTAVPE and STK) vs. all	ATLAS	level_3_annotation_full_timed	Brassino_homeo_GO0010268_modsc	0.0131279	0.0765027	-0.018722	0.0568878	n.s. 0.1	pos	3
7DAP 9. CZE LEA-enriched (ABR)	7DAP 9. CZE LEA-enriched (ABR) vs. all	ATLAS	level_3_annotation_full_timed	Brassino_homeo_GO0010268_modsc	0.0161557	-0.105802	-0.0170221	0.0663234	n.s. 0.1	neg	3
5DAP 2. CZE nodule-like (MEA)	5DAP 2. CZE nodule-like (MEA) vs. all	ATLAS	level_3_annotation_full_timed	Brassino_homeo_GO0010268_modsc	0.0174266	-0.108105	-0.0168752	0.0679637	n.s. 0.1	neg	3
7DAP 14. PEN dehydrin enriched (ERD10)	7DAP 14. PEN dehydrin enriched (ERD10) vs. all	ATLAS	level_3_annotation_full_timed	Brassino_homeo_GO0010268_modsc	0.02357	-0.099009	-0.0171148	0.0833254	n.s. 0.1	neg	3
3DAP 4. CZE nodule (CYCD4;2)	3DAP 4. CZE nodule (CYCD4;2) vs. all	ATLAS	level_3_annotation_full_timed	Brassino_homeo_GO0010268_modsc	0.0245079	-0.098468	-0.0170189	0.0833254	n.s. 0.1	neg	3
3DAP 16. CZSC placentochalazal callose-synthesizing (ARR22, TET5, and CALS8)	3DAP 16. CZSC placentochalazal callose-synthesizing (ARR22, TET5, and CALS8) vs. all	ATLAS	level_3_annotation_full_timed	Brassino_homeo_GO0010268_modsc	0.0255097	-0.0982749	-0.0166778	0.0833254	n.s. 0.1	neg	3
3DAP 2. CZE nodule-like (MEA)	3DAP 2. CZE nodule-like (MEA) vs. all	ATLAS	level_3_annotation_full_timed	Brassino_homeo_GO0010268_modsc	0.0267957	-0.0971843	-0.0169509	0.0833254	n.s. 0.1	neg	3
3DAP 20. ii2 general (DELTAVPE and STK)	3DAP 20. ii2 general (DELTAVPE and STK) vs. all	ATLAS	level_3_annotation_full_timed	Brassino_homeo_GO0010268_modsc	0.0277689	0.0594849	-0.0183849	0.0833254	n.s. 0.1	pos	3
7DAP 13. PEN (ABS6)	7DAP 13. PEN (ABS6) vs. all	ATLAS	level_3_annotation_full_timed	Brassino_homeo_GO0010268_modsc	0.0277751	-0.0918098	-0.016116	0.0833254	n.s. 0.1	neg	3
5DAP 23. oi1 flavinol synthesizing high PCD (MYB11, SCOOP15, BAP1)	5DAP 23. oi1 flavinol synthesizing high PCD (MYB11, SCOOP15, BAP1) vs. all	ATLAS	level_3_annotation_full_timed	Brassino_homeo_GO0010268_modsc	0.0292662	0.0745672	-0.0185715	0.0845468	n.s. 0.1	pos	3
5DAP 21. oi1 flavinol synthesizing (MYB11)	5DAP 21. oi1 flavinol synthesizing (MYB11) vs. all	ATLAS	level_3_annotation_full_timed	Brassino_homeo_GO0010268_modsc	0.0314358	0.0625919	-0.0239666	0.0875711	n.s. 0.1	pos	3
3DAP 5. MCE (ARF13)	3DAP 5. MCE (ARF13) vs. all	ATLAS	level_3_annotation_full_timed	Brassino_homeo_GO0010268_modsc	0.0339004	-0.0943233	-0.0160065	0.0911803	n.s. 0.1	neg	3
5DAP 9. PEN general II (NAC075)	5DAP 9. PEN general II (NAC075) vs. all	ATLAS	level_3_annotation_full_timed	Brassino_homeo_GO0010268_modsc	0.0455175	-0.0839803	-0.0163262	0.11834562305438004	n.s.	neg	3
5DAP 22. oi1 basal (MYB11 and PIN3)	5DAP 22. oi1 basal (MYB11 and PIN3) vs. all	ATLAS	level_3_annotation_full_timed	Brassino_homeo_GO0010268_modsc	0.0514011	0.0556283	-0.0191314	0.129332	n.s.	pos	3
7DAP 3. EMB dividing (MAD2, HMGB6)	7DAP 3. EMB dividing (MAD2, HMGB6) vs. all	ATLAS	level_3_annotation_full_timed	Brassino_homeo_GO0010268_modsc	0.0556493	-0.0801896	-0.0168677	0.13564507213136878	n.s.	neg	3
7DAP 4. EMB vascular primordium (SHR)	7DAP 4. EMB vascular primordium (SHR) vs. all	ATLAS	level_3_annotation_full_timed	Brassino_homeo_GO0010268_modsc	0.077206	0.0418801	-0.0187226	0.17920363686802887	n.s.	pos	3
7DAP 10. CZE disaccharide metabolic (ARR21)	7DAP 10. CZE disaccharide metabolic (ARR21) vs. all	ATLAS	level_3_annotation_full_timed	Brassino_homeo_GO0010268_modsc	0.0781144	-0.0745658	-0.0172318	0.17920363686802887	n.s.	neg	3
7DAP 11. MCE_ESR high PCD (ZOU and NAC074)	7DAP 11. MCE_ESR high PCD (ZOU and NAC074) vs. all	ATLAS	level_3_annotation_full_timed	Brassino_homeo_GO0010268_modsc	0.0858022	-0.0715772	-0.016844	0.19056399263217896	n.s.	neg	3
7DAP 17. ii1 endothelium (BAN and TT1)	7DAP 17. ii1 endothelium (BAN and TT1) vs. all	ATLAS	level_3_annotation_full_timed	Brassino_homeo_GO0010268_modsc	0.0879526	-0.0721382	-0.0172135	0.19056399263217896	n.s.	neg	3
7DAP 6. EMB cortical initials (JKD)	7DAP 6. EMB cortical initials (JKD) vs. all	ATLAS	level_3_annotation_full_timed	Brassino_homeo_GO0010268_modsc	0.0950531	-0.0720188	-0.0171726	0.1999998539672628	n.s.	neg	3
5DAP 16. CZSC placentochalazal callose-synthesizing (ARR22, TET5, and CALS8)	5DAP 16. CZSC placentochalazal callose-synthesizing (ARR22, TET5, and CALS8) vs. all	ATLAS	level_3_annotation_full_timed	Brassino_homeo_GO0010268_modsc	0.0974358	-0.0705073	-0.0171407	0.1999998539672628	n.s.	neg	3
3DAP 13. CPT persistent nucellus (AGO3)	3DAP 13. CPT persistent nucellus (AGO3) vs. all	ATLAS	level_3_annotation_full_timed	Brassino_homeo_GO0010268_modsc	0.100067	-0.0708695	-0.016791	0.200133	n.s.	neg	3
7DAP 12. MCE_ESR sheath promoting (ZOU, RGP3 and KRS)	7DAP 12. MCE_ESR sheath promoting (ZOU, RGP3 and KRS) vs. all	ATLAS	level_3_annotation_full_timed	Brassino_homeo_GO0010268_modsc	0.10769	-0.0680426	-0.017035	0.2099958930518592	n.s.	neg	3
3DAP 26. oi2 very long chain fatty acid-synthesizing (KCS6 and WRI4)	3DAP 26. oi2 very long chain fatty acid-synthesizing (KCS6 and WRI4) vs. all	ATLAS	level_3_annotation_full_timed	Brassino_homeo_GO0010268_modsc	0.114908	0.0328238	-0.0174251	0.2186057148313112	n.s.	pos	3
5DAP 28. oi2 very long chain fatty acid-synthesizing (KCS6 and WRI4)	5DAP 28. oi2 very long chain fatty acid-synthesizing (KCS6 and WRI4) vs. all	ATLAS	level_3_annotation_full_timed	Brassino_homeo_GO0010268_modsc	0.119003	0.0372793	-0.0174398	0.2210057990470367	n.s.	pos	3
3DAP 23. oi1 flavinol synthesizing S-phase (MYB11 and BARD1)	3DAP 23. oi1 flavinol synthesizing S-phase (MYB11 and BARD1) vs. all	ATLAS	level_3_annotation_full_timed	Brassino_homeo_GO0010268_modsc	0.130962	0.0330764	-0.0174178	0.23751660446216585	n.s.	pos	3
3DAP 9. FUN epidermal (CER3)	3DAP 9. FUN epidermal (CER3) vs. all	ATLAS	level_3_annotation_full_timed	Brassino_homeo_GO0010268_modsc	0.135311	0.0334479	-0.0173017	0.23751660446216585	n.s.	pos	3
7DAP 1. EMB inner cotyledon (XYL4)	7DAP 1. EMB inner cotyledon (XYL4) vs. all	ATLAS	level_3_annotation_full_timed	Brassino_homeo_GO0010268_modsc	0.138147	-0.062649	-0.0169443	0.23751660446216585	n.s.	neg	3
7DAP 2. EMB protoderm (PDF1)	7DAP 2. EMB protoderm (PDF1) vs. all	ATLAS	level_3_annotation_full_timed	Brassino_homeo_GO0010268_modsc	0.140074	-0.0626207	-0.0170145	0.23751660446216585	n.s.	neg	3
3DAP 19. ii1' (DELTAVPE and UMAMIT29)	3DAP 19. ii1' (DELTAVPE and UMAMIT29) vs. all	ATLAS	level_3_annotation_full_timed	Brassino_homeo_GO0010268_modsc	0.145491	-0.0638347	-0.0160796	0.24145302742116345	n.s.	neg	3
5DAP 1. EMB (PDF1)	5DAP 1. EMB (PDF1) vs. all	ATLAS	level_3_annotation_full_timed	Brassino_homeo_GO0010268_modsc	0.152004	-0.0628028	-0.0169479	0.24700680623374435	n.s.	neg	3
3DAP 10. FUN companion cells (SUC2)	3DAP 10. FUN companion cells (SUC2) vs. all	ATLAS	level_3_annotation_full_timed	Brassino_homeo_GO0010268_modsc	0.240126	-0.0555269	-0.0172301	0.38224078431024944	n.s.	neg	3
7DAP 21. oi2 general (GLABRA2)	7DAP 21. oi2 general (GLABRA2) vs. all	ATLAS	level_3_annotation_full_timed	Brassino_homeo_GO0010268_modsc	0.270268	-0.0504948	-0.0173386	0.42161885578532776	n.s.	neg	3
3DAP 15. CZSC placentochalazal phosphate transport (ARR22, SWEET10, and UMAMIT14)	3DAP 15. CZSC placentochalazal phosphate transport (ARR22, SWEET10, and UMAMIT14) vs. all	ATLAS	level_3_annotation_full_timed	Brassino_homeo_GO0010268_modsc	0.289795	-0.0491657	-0.0167655	0.43934950415844454	n.s.	neg	3
5DAP 18. ii1 endothelium (BAN and TT1)	5DAP 18. ii1 endothelium (BAN and TT1) vs. all	ATLAS	level_3_annotation_full_timed	Brassino_homeo_GO0010268_modsc	0.2929	-0.048368	-0.0171743	0.43934950415844454	n.s.	neg	3
5DAP 17. ii1 basal (contains pigment strand) (BAN and ARR22)	5DAP 17. ii1 basal (contains pigment strand) (BAN and ARR22) vs. all	ATLAS	level_3_annotation_full_timed	Brassino_homeo_GO0010268_modsc	0.304556	0.0134618	-0.0174885	0.4482151463740286	n.s.	pos	3
7DAP 20. oi1 polyester monomer biosynthesis (MYB11 and CYP86B1)	7DAP 20. oi1 polyester monomer biosynthesis (MYB11 and CYP86B1) vs. all	ATLAS	level_3_annotation_full_timed	Brassino_homeo_GO0010268_modsc	0.324388	0.0118894	-0.0185117	0.46382435137645694	n.s.	pos	3
5DAP 15. CZSC placentochalazal phosphate transport (ARR22, SWEET10, and UMAMIT14)	5DAP 15. CZSC placentochalazal phosphate transport (ARR22, SWEET10, and UMAMIT14) vs. all	ATLAS	level_3_annotation_full_timed	Brassino_homeo_GO0010268_modsc	0.327056	0.0142537	-0.017735	0.46382435137645694	n.s.	pos	3
5DAP 27. oi2 general (GLABRA2)	5DAP 27. oi2 general (GLABRA2) vs. all	ATLAS	level_3_annotation_full_timed	Brassino_homeo_GO0010268_modsc	0.392839	0.00780836	-0.01779	0.5471687805851363	n.s.	pos	3
5DAP 26. oi2 LTP-enriched (LTP1)	5DAP 26. oi2 LTP-enriched (LTP1) vs. all	ATLAS	level_3_annotation_full_timed	Brassino_homeo_GO0010268_modsc	0.420447	0.00619733	-0.0178094	0.5753488361822089	n.s.	pos	3
3DAP 27. oi2 general (GLABRA2 and WRKY40)	3DAP 27. oi2 general (GLABRA2 and WRKY40) vs. all	ATLAS	level_3_annotation_full_timed	Brassino_homeo_GO0010268_modsc	0.428662	0.00589388	-0.0171581	0.5764765824317692	n.s.	pos	3
5DAP 14. CPT apical persistent nucellus (AGO3)	5DAP 14. CPT apical persistent nucellus (AGO3) vs. all	ATLAS	level_3_annotation_full_timed	Brassino_homeo_GO0010268_modsc	0.438856	-0.0407996	-0.0171083	0.5801821599994667	n.s.	neg	3
5DAP 25. oi1 S-phase (MYB11 and TSO2)	5DAP 25. oi1 S-phase (MYB11 and TSO2) vs. all	ATLAS	level_3_annotation_full_timed	Brassino_homeo_GO0010268_modsc	0.465168	0.00585782	-0.0173531	0.6047177851906517	n.s.	pos	3
5DAP 13. FUN epidermal (CER3)	5DAP 13. FUN epidermal (CER3) vs. all	ATLAS	level_3_annotation_full_timed	Brassino_homeo_GO0010268_modsc	0.475925	0.00745863	-0.0173153	0.6085597925728723	n.s.	pos	3
7DAP 19. oi1 flavinol synthesizing (MYB11)	7DAP 19. oi1 flavinol synthesizing (MYB11) vs. all	ATLAS	level_3_annotation_full_timed	Brassino_homeo_GO0010268_modsc	0.514906	8.7720630694306e-4	-0.0190658	0.6477843966185216	n.s.	pos	3
7DAP 7. EMB hypophysis (SMB)	7DAP 7. EMB hypophysis (SMB) vs. all	ATLAS	level_3_annotation_full_timed	Brassino_homeo_GO0010268_modsc	0.538824	7.1061943561411e-4	-0.0174909	0.6671156941695083	n.s.	pos	3
3DAP 25. oi2 general (GLABRA2)	3DAP 25. oi2 general (GLABRA2) vs. all	ATLAS	level_3_annotation_full_timed	Brassino_homeo_GO0010268_modsc	0.688551	-0.00478427	-0.0165684	0.820138	n.s.	pos	3
3DAP 3. CZE basal cyst (RALFL3)	3DAP 3. CZE basal cyst (RALFL3) vs. all	ATLAS	level_3_annotation_full_timed	Brassino_homeo_GO0010268_modsc	0.693857	-0.0284477	-0.017229	0.820138	n.s.	neg	3
7DAP 15. CZSC general (ARR22, SWEET10, and TET5)	7DAP 15. CZSC general (ARR22, SWEET10, and TET5) vs. all	ATLAS	level_3_annotation_full_timed	Brassino_homeo_GO0010268_modsc	0.693963	-0.028909	-0.0175935	0.820138	n.s.	neg	3
3DAP 1. EMB (PDF1)	3DAP 1. EMB (PDF1) vs. all	ATLAS	level_3_annotation_full_timed	Brassino_homeo_GO0010268_modsc	0.71783	-0.0282917	-0.0170672	0.835683	n.s.	neg	3
3DAP 17. ii1 endothelium (BAN and TT1)	3DAP 17. ii1 endothelium (BAN and TT1) vs. all	ATLAS	level_3_annotation_full_timed	Brassino_homeo_GO0010268_modsc	0.756978	-0.0248286	-0.0154282	0.8577050895439915	n.s.	neg	3
7DAP 5. EMB ground tissue initials (JKD, SCR)	7DAP 5. EMB ground tissue initials (JKD, SCR) vs. all	ATLAS	level_3_annotation_full_timed	Brassino_homeo_GO0010268_modsc	0.791761	-0.0100938	-0.0177406	0.8577050895439915	n.s.	pos	3
3DAP 11. OVL scenescing (BFN1)	3DAP 11. OVL scenescing (BFN1) vs. all	ATLAS	level_3_annotation_full_timed	Brassino_homeo_GO0010268_modsc	0.807091	-0.0244239	-0.0171264	0.8577050895439915	n.s.	neg	3
7DAP 16. ii1 basal (contains pigment strand) (BAN and SWEET4)	7DAP 16. ii1 basal (contains pigment strand) (BAN and SWEET4) vs. all	ATLAS	level_3_annotation_full_timed	Brassino_homeo_GO0010268_modsc	0.807966	-0.0243101	-0.0174088	0.8577050895439915	n.s.	neg	3
3DAP 28. oi2 S-phase (GLABRA2 and BARD1)	3DAP 28. oi2 S-phase (GLABRA2 and BARD1) vs. all	ATLAS	level_3_annotation_full_timed	Brassino_homeo_GO0010268_modsc	0.810964	-0.023959	-0.0170336	0.8577050895439915	n.s.	neg	3
5DAP 29. oi2 S-phase (GLABRA2, TSO2)	5DAP 29. oi2 S-phase (GLABRA2, TSO2) vs. all	ATLAS	level_3_annotation_full_timed	Brassino_homeo_GO0010268_modsc	0.818703	-0.0107466	-0.0172724	0.8577050895439915	n.s.	pos	3
3DAP 18. ii1 basal (contains pigment strand) (BAN and SWEET4)	3DAP 18. ii1 basal (contains pigment strand) (BAN and SWEET4) vs. all	ATLAS	level_3_annotation_full_timed	Brassino_homeo_GO0010268_modsc	0.820723	-0.0104023	-0.0168975	0.8577050895439915	n.s.	pos	3
3DAP 8. FUN hilum (ADPG1)	3DAP 8. FUN hilum (ADPG1) vs. all	ATLAS	level_3_annotation_full_timed	Brassino_homeo_GO0010268_modsc	0.824716	-0.023378	-0.0170562	0.8577050895439915	n.s.	neg	3
5DAP 19. ii1' (DELTAVPE and UMAMIT29)	5DAP 19. ii1' (DELTAVPE and UMAMIT29) vs. all	ATLAS	level_3_annotation_full_timed	Brassino_homeo_GO0010268_modsc	0.869211	-0.0219062	-0.0172159	0.8920847621502243	n.s.	neg	3
5DAP 4. CZE basal cyst (RALFL3)	5DAP 4. CZE basal cyst (RALFL3) vs. all	ATLAS	level_3_annotation_full_timed	Brassino_homeo_GO0010268_modsc	0.908331	-0.0128286	-0.0172829	0.9201276218961668	n.s.	pos	3
7DAP 18. ii1'/ii2 (DELTAVPE)	7DAP 18. ii1'/ii2 (DELTAVPE) vs. all	ATLAS	level_3_annotation_full_timed	Brassino_homeo_GO0010268_modsc	0.93505	-0.0150865	-0.0175489	0.93505	n.s.	pos	3
ii1	ii1 vs. all	ATLAS	level_2_annotation	Brassino_biosyn_GO0016132_modsc	7.90739486523453e-6	-0.0803115	-0.00610411	1.0279613324804888e-4	***	neg	3
CZE	CZE vs. all	ATLAS	level_2_annotation	Brassino_biosyn_GO0016132_modsc	2.4931148061136e-5	-0.0945808	-0.00596123	1.62052462397384e-4	***	neg	3
ii2	ii2 vs. all	ATLAS	level_2_annotation	Brassino_biosyn_GO0016132_modsc	3.86907039748098e-5	0.102568	-0.0163844	1.676597172241758e-4	***	pos	3
CZSC	CZSC vs. all	ATLAS	level_2_annotation	Brassino_biosyn_GO0016132_modsc	3.6128794535572e-4	-0.050346	-0.00926601	0.00117419	**	neg	3
PEN	PEN vs. all	ATLAS	level_2_annotation	Brassino_biosyn_GO0016132_modsc	0.00762071	-0.0710226	-0.00460562	0.0198138	*	neg	3
ii1'	ii1' vs. all	ATLAS	level_2_annotation	Brassino_biosyn_GO0016132_modsc	0.0111405	-0.0672979	-0.00952803	0.0241377	*	neg	3
OVL	OVL vs. all	ATLAS	level_2_annotation	Brassino_biosyn_GO0016132_modsc	0.0290668	-0.054373	-0.0111947	0.0539813	n.s. 0.1	neg	3
CPT	CPT vs. all	ATLAS	level_2_annotation	Brassino_biosyn_GO0016132_modsc	0.074728	-0.039935	-0.0110333	0.12143307451891544	n.s.	neg	3
oi1	oi1 vs. all	ATLAS	level_2_annotation	Brassino_biosyn_GO0016132_modsc	0.216454	9.79749412226014e-5	-0.0208448	0.31265533562013686	n.s.	pos	3
EMB	EMB vs. all	ATLAS	level_2_annotation	Brassino_biosyn_GO0016132_modsc	0.443325	-0.00597369	-0.0186851	0.5763221420222331	n.s.	pos	3
FUN	FUN vs. all	ATLAS	level_2_annotation	Brassino_biosyn_GO0016132_modsc	0.492753	-0.0212821	-0.0112237	0.5823440204901977	n.s.	neg	3
oi2	oi2 vs. all	ATLAS	level_2_annotation	Brassino_biosyn_GO0016132_modsc	0.813513	-0.0208436	-0.0139296	0.814453	n.s.	neg	3
MCE	MCE vs. all	ATLAS	level_2_annotation	Brassino_biosyn_GO0016132_modsc	0.814453	-0.0235241	-0.0141385	0.814453	n.s.	neg	3
3DAP MCE	3DAP MCE vs. all	ATLAS	level_2_annotation_timed	BZR1/BES1 family (BEH1, BEH2, BEH3, BEH4, BES1, BZR1)	0.029561	-0.0694784	0.00995748	0.167512	n.s.	neg	3
3DAP ii1	3DAP ii1 vs. all	ATLAS	level_2_annotation_timed	BZR1/BES1 family (BEH1, BEH2, BEH3, BEH4, BES1, BZR1)	0.162673	-0.0357674	0.00950752	0.447046	n.s.	neg	3
3DAP oi1	3DAP oi1 vs. all	ATLAS	level_2_annotation_timed	BZR1/BES1 family (BEH1, BEH2, BEH3, BEH4, BES1, BZR1)	0.251448	-0.0297266	0.00821913	0.534328	n.s.	neg	3
3DAP PEN	3DAP PEN vs. all	ATLAS	level_2_annotation_timed	BZR1/BES1 family (BEH1, BEH2, BEH3, BEH4, BES1, BZR1)	0.00252525	-0.122296	0.0110468	0.0286195	*	neg	3
3DAP ii2	3DAP ii2 vs. all	ATLAS	level_2_annotation_timed	BZR1/BES1 family (BEH1, BEH2, BEH3, BEH4, BES1, BZR1)	0.115616	-0.0423513	0.00974313	0.357357	n.s.	neg	3
3DAP EMB	3DAP EMB vs. all	ATLAS	level_2_annotation_timed	BZR1/BES1 family (BEH1, BEH2, BEH3, BEH4, BES1, BZR1)	0.112884	-0.0429787	0.00962597	0.357357	n.s.	neg	3
3DAP CZSC	3DAP CZSC vs. all	ATLAS	level_2_annotation_timed	BZR1/BES1 family (BEH1, BEH2, BEH3, BEH4, BES1, BZR1)	0.505321	-0.011876	0.00896257	0.758482	n.s.	neg	3
3DAP oi2	3DAP oi2 vs. all	ATLAS	level_2_annotation_timed	BZR1/BES1 family (BEH1, BEH2, BEH3, BEH4, BES1, BZR1)	0.197202	-0.0323385	0.00929542	0.478918	n.s.	neg	3
3DAP CPT	3DAP CPT vs. all	ATLAS	level_2_annotation_timed	BZR1/BES1 family (BEH1, BEH2, BEH3, BEH4, BES1, BZR1)	0.170929	-0.0346693	0.00957109	0.447046	n.s.	neg	3
3DAP OVL	3DAP OVL vs. all	ATLAS	level_2_annotation_timed	BZR1/BES1 family (BEH1, BEH2, BEH3, BEH4, BES1, BZR1)	0.543129	-0.0100543	0.00948173	0.758482	n.s.	neg	3
3DAP FUN	3DAP FUN vs. all	ATLAS	level_2_annotation_timed	BZR1/BES1 family (BEH1, BEH2, BEH3, BEH4, BES1, BZR1)	0.876876	0.0045343	0.00923807	0.931681	n.s.	neg	3
3DAP ii1'	3DAP ii1' vs. all	ATLAS	level_2_annotation_timed	BZR1/BES1 family (BEH1, BEH2, BEH3, BEH4, BES1, BZR1)	0.0770717	-0.0502854	0.0097792	0.29116	n.s.	neg	3
3DAP CZE	3DAP CZE vs. all	ATLAS	level_2_annotation_timed	BZR1/BES1 family (BEH1, BEH2, BEH3, BEH4, BES1, BZR1)	0.0180811	-0.080625	0.00985952	0.122951	n.s.	neg	3
5DAP PEN	5DAP PEN vs. all	ATLAS	level_2_annotation_timed	BZR1/BES1 family (BEH1, BEH2, BEH3, BEH4, BES1, BZR1)	0.00105768	0.131242	-0.00149407	0.0179805	*	pos	3
5DAP ii2	5DAP ii2 vs. all	ATLAS	level_2_annotation_timed	BZR1/BES1 family (BEH1, BEH2, BEH3, BEH4, BES1, BZR1)	0.448693	-0.0133639	0.0104569	0.758482	n.s.	neg	3
5DAP oi1	5DAP oi1 vs. all	ATLAS	level_2_annotation_timed	BZR1/BES1 family (BEH1, BEH2, BEH3, BEH4, BES1, BZR1)	0.526369	-0.00659838	0.0172645	0.758482	n.s.	neg	3
5DAP oi2	5DAP oi2 vs. all	ATLAS	level_2_annotation_timed	BZR1/BES1 family (BEH1, BEH2, BEH3, BEH4, BES1, BZR1)	0.569666	-0.00618665	0.012029	0.758482	n.s.	neg	3
5DAP CZSC	5DAP CZSC vs. all	ATLAS	level_2_annotation_timed	BZR1/BES1 family (BEH1, BEH2, BEH3, BEH4, BES1, BZR1)	0.580016	-0.00677053	0.0103598	0.758482	n.s.	neg	3
5DAP MCE	5DAP MCE vs. all	ATLAS	level_2_annotation_timed	BZR1/BES1 family (BEH1, BEH2, BEH3, BEH4, BES1, BZR1)	0.000116484	0.394497	0.00572497	0.00396047	**	pos	3
5DAP CZE	5DAP CZE vs. all	ATLAS	level_2_annotation_timed	BZR1/BES1 family (BEH1, BEH2, BEH3, BEH4, BES1, BZR1)	0.0479643	-0.0616419	0.0109244	0.23297	n.s.	neg	3
5DAP ii1	5DAP ii1 vs. all	ATLAS	level_2_annotation_timed	BZR1/BES1 family (BEH1, BEH2, BEH3, BEH4, BES1, BZR1)	0.564396	-0.00740871	0.0101488	0.758482	n.s.	neg	3
5DAP ii1'	5DAP ii1' vs. all	ATLAS	level_2_annotation_timed	BZR1/BES1 family (BEH1, BEH2, BEH3, BEH4, BES1, BZR1)	0.916921	0.00653765	0.00983952	0.944707	n.s.	neg	3
5DAP CPT	5DAP CPT vs. all	ATLAS	level_2_annotation_timed	BZR1/BES1 family (BEH1, BEH2, BEH3, BEH4, BES1, BZR1)	0.999655	0.00973401	0.00974691	0.999655	n.s.	neg	3
5DAP EMB	5DAP EMB vs. all	ATLAS	level_2_annotation_timed	BZR1/BES1 family (BEH1, BEH2, BEH3, BEH4, BES1, BZR1)	0.226734	-0.0301092	0.0102114	0.513931	n.s.	neg	3
5DAP FUN	5DAP FUN vs. all	ATLAS	level_2_annotation_timed	BZR1/BES1 family (BEH1, BEH2, BEH3, BEH4, BES1, BZR1)	0.686401	-0.00270211	0.00969144	0.825385	n.s.	neg	3
7DAP oi2	7DAP oi2 vs. all	ATLAS	level_2_annotation_timed	BZR1/BES1 family (BEH1, BEH2, BEH3, BEH4, BES1, BZR1)	0.547764	-0.00823742	0.0101009	0.758482	n.s.	neg	3
7DAP EMB	7DAP EMB vs. all	ATLAS	level_2_annotation_timed	BZR1/BES1 family (BEH1, BEH2, BEH3, BEH4, BES1, BZR1)	0.850133	0.00735757	0.0132591	0.931681	n.s.	neg	3
7DAP MCE	7DAP MCE vs. all	ATLAS	level_2_annotation_timed	BZR1/BES1 family (BEH1, BEH2, BEH3, BEH4, BES1, BZR1)	0.00526798	0.125926	0.00459335	0.0447778	*	pos	3
7DAP CZE	7DAP CZE vs. all	ATLAS	level_2_annotation_timed	BZR1/BES1 family (BEH1, BEH2, BEH3, BEH4, BES1, BZR1)	0.662448	-0.00233885	0.0111448	0.825385	n.s.	neg	3
7DAP oi1	7DAP oi1 vs. all	ATLAS	level_2_annotation_timed	BZR1/BES1 family (BEH1, BEH2, BEH3, BEH4, BES1, BZR1)	0.514111	-0.0090432	0.0113397	0.758482	n.s.	neg	3
7DAP PEN	7DAP PEN vs. all	ATLAS	level_2_annotation_timed	BZR1/BES1 family (BEH1, BEH2, BEH3, BEH4, BES1, BZR1)	0.0695947	0.0693955	0.00796821	0.29116	n.s.	pos	3
7DAP ii1'	7DAP ii1' vs. all	ATLAS	level_2_annotation_timed	BZR1/BES1 family (BEH1, BEH2, BEH3, BEH4, BES1, BZR1)	0.565999	0.0273048	0.00959108	0.758482	n.s.	pos	3
7DAP CZSC	7DAP CZSC vs. all	ATLAS	level_2_annotation_timed	BZR1/BES1 family (BEH1, BEH2, BEH3, BEH4, BES1, BZR1)	0.728281	-0.000507177	0.00989907	0.825385	n.s.	neg	3
7DAP ii1	7DAP ii1 vs. all	ATLAS	level_2_annotation_timed	BZR1/BES1 family (BEH1, BEH2, BEH3, BEH4, BES1, BZR1)	0.720732	0.0203453	0.00963606	0.825385	n.s.	pos	3
3DAP MCE	3DAP MCE vs. all	ATLAS	level_2_annotation_timed	Nitrate_TAIR_transp_modsc	1.1380072328334445e-4	-0.0666639	0.012983218738539927	3.517476901485192e-4	***	neg	ExtD6
3DAP ii1	3DAP ii1 vs. all	ATLAS	level_2_annotation_timed	Nitrate_TAIR_transp_modsc	0.00143311	-0.0440394	0.015451489057201338	0.00243629	**	neg	ExtD6
3DAP oi1	3DAP oi1 vs. all	ATLAS	level_2_annotation_timed	Nitrate_TAIR_transp_modsc	5.679217099188264e-4	0.0974802	-0.00219012	0.00113584	**	pos	ExtD6
3DAP PEN	3DAP PEN vs. all	ATLAS	level_2_annotation_timed	Nitrate_TAIR_transp_modsc	7.1599994507138095e-6	-0.123895	0.0144577	8.433520560617409e-5	****	neg	ExtD6
3DAP ii2	3DAP ii2 vs. all	ATLAS	level_2_annotation_timed	Nitrate_TAIR_transp_modsc	2.753624281821729e-4	-0.0543669	0.014047531367177457	6.241548372129252e-4	***	neg	ExtD6
3DAP EMB	3DAP EMB vs. all	ATLAS	level_2_annotation_timed	Nitrate_TAIR_transp_modsc	0.14140212036191033	-0.00154749	0.012128189789711906	0.15508619652596614	n.s.	neg	ExtD6
3DAP CZSC	3DAP CZSC vs. all	ATLAS	level_2_annotation_timed	Nitrate_TAIR_transp_modsc	1.08773600931632e-6	0.15001218621710471	0.00876328	3.698302431675488e-5	****	pos	ExtD6
3DAP oi2	3DAP oi2 vs. all	ATLAS	level_2_annotation_timed	Nitrate_TAIR_transp_modsc	0.00531222	-0.0255172	0.014586970451631454	0.00752564	**	neg	ExtD6
3DAP CPT	3DAP CPT vs. all	ATLAS	level_2_annotation_timed	Nitrate_TAIR_transp_modsc	6.951422727120092e-4	-0.0388288	0.012552026930960814	0.00131305	**	neg	ExtD6
3DAP OVL	3DAP OVL vs. all	ATLAS	level_2_annotation_timed	Nitrate_TAIR_transp_modsc	5.8354124919660205e-5	0.0977569	0.0118026	2.431498173390814e-4	***	pos	ExtD6
3DAP FUN	3DAP FUN vs. all	ATLAS	level_2_annotation_timed	Nitrate_TAIR_transp_modsc	0.00887194	0.0414207	0.011834479825250191	0.0111721	*	pos	ExtD6
3DAP ii1'	3DAP ii1' vs. all	ATLAS	level_2_annotation_timed	Nitrate_TAIR_transp_modsc	3.4540058558049026e-5	-0.0820513	0.013452024109791775	1.6776599871052382e-4	***	neg	ExtD6
3DAP CZE	3DAP CZE vs. all	ATLAS	level_2_annotation_timed	Nitrate_TAIR_transp_modsc	9.921788894844011e-6	-0.103144	0.012777860385045307	8.433520560617409e-5	****	neg	ExtD6
5DAP PEN	5DAP PEN vs. all	ATLAS	level_2_annotation_timed	Nitrate_TAIR_transp_modsc	1.43969920252824e-4	-0.0765327	0.022854337076004143	4.0791477404966806e-4	***	neg	ExtD6
5DAP ii2	5DAP ii2 vs. all	ATLAS	level_2_annotation_timed	Nitrate_TAIR_transp_modsc	2.5678415592445355e-4	-0.0488309	0.0129856	6.236186643879585e-4	***	neg	ExtD6
5DAP oi1	5DAP oi1 vs. all	ATLAS	level_2_annotation_timed	Nitrate_TAIR_transp_modsc	0.00601406	0.0841986	-0.000614493	0.00786453	**	pos	ExtD6
5DAP oi2	5DAP oi2 vs. all	ATLAS	level_2_annotation_timed	Nitrate_TAIR_transp_modsc	0.6029252335298798	0.016526559951182334	0.011678100607990082	0.6029252335298798	n.s.	pos	ExtD6
5DAP CZSC	5DAP CZSC vs. all	ATLAS	level_2_annotation_timed	Nitrate_TAIR_transp_modsc	8.603251287248736e-6	0.13953812662939816	0.00996583	8.433520560617409e-5	****	pos	ExtD6
5DAP MCE	5DAP MCE vs. all	ATLAS	level_2_annotation_timed	Nitrate_TAIR_transp_modsc	0.0979366	0.0679029	0.011240678397023371	0.11482221538340132	n.s.	pos	ExtD6
5DAP CZE	5DAP CZE vs. all	ATLAS	level_2_annotation_timed	Nitrate_TAIR_transp_modsc	1.357924419808369e-5	-0.099635	0.013546990412742413	9.233886054696909e-5	****	neg	ExtD6
5DAP ii1	5DAP ii1 vs. all	ATLAS	level_2_annotation_timed	Nitrate_TAIR_transp_modsc	3.855034033025592e-4	-0.043835	0.012623657606134073	8.191947320179383e-4	***	neg	ExtD6
5DAP ii1'	5DAP ii1' vs. all	ATLAS	level_2_annotation_timed	Nitrate_TAIR_transp_modsc	8.758077371593429e-4	-0.0482452	0.012439635645238046	0.00156723	**	neg	ExtD6
5DAP CPT	5DAP CPT vs. all	ATLAS	level_2_annotation_timed	Nitrate_TAIR_transp_modsc	0.24709896187076247	0.00138181	0.012100627356229549	0.26254264698768515	n.s.	neg	ExtD6
5DAP EMB	5DAP EMB vs. all	ATLAS	level_2_annotation_timed	Nitrate_TAIR_transp_modsc	8.107305847056994e-5	-0.0586316	0.012608930822873426	2.7564839879993776e-4	***	neg	ExtD6
5DAP FUN	5DAP FUN vs. all	ATLAS	level_2_annotation_timed	Nitrate_TAIR_transp_modsc	0.3452693734502888	0.020727051368850002	0.0120205	0.35573208173666115	n.s.	pos	ExtD6
7DAP oi2	7DAP oi2 vs. all	ATLAS	level_2_annotation_timed	Nitrate_TAIR_transp_modsc	0.11198794115204969	-0.0025656	0.012257	0.12691966663898965	n.s.	neg	ExtD6
7DAP EMB	7DAP EMB vs. all	ATLAS	level_2_annotation_timed	Nitrate_TAIR_transp_modsc	0.00308306	-0.0391456	0.021952361742190986	0.00476474	**	neg	ExtD6
7DAP MCE	7DAP MCE vs. all	ATLAS	level_2_annotation_timed	Nitrate_TAIR_transp_modsc	1.7950706506256946e-4	0.10696331869442868	0.00734466	4.6948001631748934e-4	***	pos	ExtD6
7DAP CZE	7DAP CZE vs. all	ATLAS	level_2_annotation_timed	Nitrate_TAIR_transp_modsc	0.00572368	-0.0227405	0.013918944852109368	0.00778421	**	neg	ExtD6
7DAP oi1	7DAP oi1 vs. all	ATLAS	level_2_annotation_timed	Nitrate_TAIR_transp_modsc	6.436318694269802e-5	0.0989049	0.00747578	2.431498173390814e-4	***	pos	ExtD6
7DAP PEN	7DAP PEN vs. all	ATLAS	level_2_annotation_timed	Nitrate_TAIR_transp_modsc	0.00447704	-0.0255082	0.0133528	0.00661823	**	neg	ExtD6
7DAP ii1'	7DAP ii1' vs. all	ATLAS	level_2_annotation_timed	Nitrate_TAIR_transp_modsc	0.0029161	0.0498189	0.011796402635782915	0.00472131	**	pos	ExtD6
7DAP CZSC	7DAP CZSC vs. all	ATLAS	level_2_annotation_timed	Nitrate_TAIR_transp_modsc	2.2405718038590235e-5	0.10632516641459991	0.010912785023676994	1.2696573555201135e-4	***	pos	ExtD6
7DAP ii1	7DAP ii1 vs. all	ATLAS	level_2_annotation_timed	Nitrate_TAIR_transp_modsc	0.015732285944863006	-0.0240864	0.012335554017283274	0.019103490075905078	*	neg	ExtD6
3DAP MCE	3DAP MCE vs. all	ATLAS	level_2_annotation_timed	UMAMIT_TAIR_modsc	0.0431838	-0.0761041	-0.00717767	0.11294223187022626	n.s.	neg	ExtD6
3DAP ii1	3DAP ii1 vs. all	ATLAS	level_2_annotation_timed	UMAMIT_TAIR_modsc	0.0470449	-0.070315	-0.00560013	0.11425194795876845	n.s.	neg	ExtD6
3DAP oi1	3DAP oi1 vs. all	ATLAS	level_2_annotation_timed	UMAMIT_TAIR_modsc	0.4125827708095632	-0.0318661	-0.00785673	0.5395313156740442	n.s.	neg	ExtD6
3DAP PEN	3DAP PEN vs. all	ATLAS	level_2_annotation_timed	UMAMIT_TAIR_modsc	0.00382313	-0.126265	-0.00606647	0.018569471721003816	*	neg	ExtD6
3DAP ii2	3DAP ii2 vs. all	ATLAS	level_2_annotation_timed	UMAMIT_TAIR_modsc	0.1962223929823638	0.0316929	-0.00945098	0.3318842126278207	n.s.	pos	ExtD6
3DAP EMB	3DAP EMB vs. all	ATLAS	level_2_annotation_timed	UMAMIT_TAIR_modsc	0.0559317	-0.0713573	-0.00748623	0.12677849489282175	n.s.	neg	ExtD6
3DAP CZSC	3DAP CZSC vs. all	ATLAS	level_2_annotation_timed	UMAMIT_TAIR_modsc	0.066836	0.0540633	-0.00981436	0.14202652976434116	n.s.	pos	ExtD6
3DAP oi2	3DAP oi2 vs. all	ATLAS	level_2_annotation_timed	UMAMIT_TAIR_modsc	0.1970609441188476	-0.0456099	-0.00691385	0.3318842126278207	n.s.	neg	ExtD6
3DAP CPT	3DAP CPT vs. all	ATLAS	level_2_annotation_timed	UMAMIT_TAIR_modsc	0.3380862791089055	-0.0360373	-0.00762629	0.499425	n.s.	neg	ExtD6
3DAP OVL	3DAP OVL vs. all	ATLAS	level_2_annotation_timed	UMAMIT_TAIR_modsc	0.2049873077995363	0.032557879796214634	-0.00781737	0.3318842126278207	n.s.	pos	ExtD6
3DAP FUN	3DAP FUN vs. all	ATLAS	level_2_annotation_timed	UMAMIT_TAIR_modsc	0.5331954150430187	0.010043965406117992	-0.00803486	0.671431	n.s.	pos	ExtD6
3DAP ii1'	3DAP ii1' vs. all	ATLAS	level_2_annotation_timed	UMAMIT_TAIR_modsc	0.33953008286578734	0.0208778	-0.00841702	0.499425	n.s.	pos	ExtD6
3DAP CZE	3DAP CZE vs. all	ATLAS	level_2_annotation_timed	UMAMIT_TAIR_modsc	0.00768365	-0.113075	-0.00717121	0.0326555	*	neg	ExtD6
5DAP PEN	5DAP PEN vs. all	ATLAS	level_2_annotation_timed	UMAMIT_TAIR_modsc	0.015934307010990908	-0.0833829	-0.000220794	0.0492515	*	neg	ExtD6
5DAP ii2	5DAP ii2 vs. all	ATLAS	level_2_annotation_timed	UMAMIT_TAIR_modsc	0.0345299	0.0675881	-0.00911953	0.0978348	n.s. 0.1	pos	ExtD6
5DAP oi1	5DAP oi1 vs. all	ATLAS	level_2_annotation_timed	UMAMIT_TAIR_modsc	0.7353848359504018	-0.0189797	-0.00897142	0.8122584317943321	n.s.	neg	ExtD6
5DAP oi2	5DAP oi2 vs. all	ATLAS	level_2_annotation_timed	UMAMIT_TAIR_modsc	0.588855	-0.023453	-0.0078503	0.6991334555844169	n.s.	neg	ExtD6
5DAP CZSC	5DAP CZSC vs. all	ATLAS	level_2_annotation_timed	UMAMIT_TAIR_modsc	0.010761139397025164	0.0949474	-0.00955887	0.038710960043527774	*	pos	ExtD6
5DAP MCE	5DAP MCE vs. all	ATLAS	level_2_annotation_timed	UMAMIT_TAIR_modsc	0.7413077843640348	0.00291244	-0.00806199	0.8122584317943321	n.s.	pos	ExtD6
5DAP CZE	5DAP CZE vs. all	ATLAS	level_2_annotation_timed	UMAMIT_TAIR_modsc	0.011385576483390522	-0.102973	-0.00663652	0.038710960043527774	*	neg	ExtD6
5DAP ii1	5DAP ii1 vs. all	ATLAS	level_2_annotation_timed	UMAMIT_TAIR_modsc	0.7644785240417243	-0.016305	-0.00778455	0.8122584317943321	n.s.	neg	ExtD6
5DAP ii1'	5DAP ii1' vs. all	ATLAS	level_2_annotation_timed	UMAMIT_TAIR_modsc	7.912572102852257e-4	0.2070949957672646	-0.00909567	0.00622039	**	pos	ExtD6
5DAP CPT	5DAP CPT vs. all	ATLAS	level_2_annotation_timed	UMAMIT_TAIR_modsc	0.38906178236624867	0.017592158366085995	-0.00789215	0.5291240240180982	n.s.	pos	ExtD6
5DAP EMB	5DAP EMB vs. all	ATLAS	level_2_annotation_timed	UMAMIT_TAIR_modsc	0.0806372	-0.0642244	-0.00734625	0.16127433609461553	n.s.	neg	ExtD6
5DAP FUN	5DAP FUN vs. all	ATLAS	level_2_annotation_timed	UMAMIT_TAIR_modsc	0.5963197121161203	0.00765883	-0.00772531	0.6991334555844169	n.s.	pos	ExtD6
7DAP oi2	7DAP oi2 vs. all	ATLAS	level_2_annotation_timed	UMAMIT_TAIR_modsc	0.9076410308775138	-0.0103771	-0.00691829	0.9193450489483146	n.s.	neg	ExtD6
7DAP EMB	7DAP EMB vs. all	ATLAS	level_2_annotation_timed	UMAMIT_TAIR_modsc	0.35253494123281126	-0.036718	0.00738763	0.499425	n.s.	neg	ExtD6
7DAP MCE	7DAP MCE vs. all	ATLAS	level_2_annotation_timed	UMAMIT_TAIR_modsc	5.697867781062545e-6	0.23721321535754103	-0.0172747	1.9372750455612652e-4	***	pos	ExtD6
7DAP CZE	7DAP CZE vs. all	ATLAS	level_2_annotation_timed	UMAMIT_TAIR_modsc	0.1970334979838384	-0.050941	-0.00278558	0.3318842126278207	n.s.	neg	ExtD6
7DAP oi1	7DAP oi1 vs. all	ATLAS	level_2_annotation_timed	UMAMIT_TAIR_modsc	9.147628729549152e-4	0.12207189462219821	-0.0119998	0.00622039	**	pos	ExtD6
7DAP PEN	7DAP PEN vs. all	ATLAS	level_2_annotation_timed	UMAMIT_TAIR_modsc	0.9193450489483146	-0.00904613	-0.00596607	0.9193450489483146	n.s.	neg	ExtD6
7DAP ii1'	7DAP ii1' vs. all	ATLAS	level_2_annotation_timed	UMAMIT_TAIR_modsc	5.512834246796625e-5	0.258121	-0.00908563	9.371818219554263e-4	***	pos	ExtD6
7DAP CZSC	7DAP CZSC vs. all	ATLAS	level_2_annotation_timed	UMAMIT_TAIR_modsc	0.0022335	0.12417655602121361	-0.00868156	0.012656528302434649	*	pos	ExtD6
7DAP ii1	7DAP ii1 vs. all	ATLAS	level_2_annotation_timed	UMAMIT_TAIR_modsc	4.7486356475468183e-4	0.17168609762721243	-0.00875927	0.00538179	**	pos	ExtD6
3DAP MCE	3DAP MCE vs. all	ATLAS	level_2_annotation_timed	LCR_modsc1	1.8281053494900934e-9	0.24405220531048655	-0.00428373	6.215558188266317e-8	****	pos	5
3DAP ii1	3DAP ii1 vs. all	ATLAS	level_2_annotation_timed	LCR_modsc1	0.065803	-0.0152584	-0.000602404	0.1016955638229924	n.s.	neg	5
3DAP oi1	3DAP oi1 vs. all	ATLAS	level_2_annotation_timed	LCR_modsc1	0.11359036700905441	-0.0142439	0.00146103	0.16091968659616043	n.s.	neg	5
3DAP PEN	3DAP PEN vs. all	ATLAS	level_2_annotation_timed	LCR_modsc1	3.000986352431967e-4	0.0678584	-0.002697	0.00255084	**	pos	5
3DAP ii2	3DAP ii2 vs. all	ATLAS	level_2_annotation_timed	LCR_modsc1	0.054918724965815104	-0.0171366	-0.00103874	0.0933618	n.s. 0.1	neg	5
3DAP EMB	3DAP EMB vs. all	ATLAS	level_2_annotation_timed	LCR_modsc1	0.42028548864770254	-0.00742792	-0.00154916	0.44655333168818395	n.s.	neg	5
3DAP CZSC	3DAP CZSC vs. all	ATLAS	level_2_annotation_timed	LCR_modsc1	0.13514185660700925	0.00969561	-0.00176433	0.1837929249855326	n.s.	pos	5
3DAP oi2	3DAP oi2 vs. all	ATLAS	level_2_annotation_timed	LCR_modsc1	0.024487870127994915	-0.0218521	-0.000135621	0.052036724021989195	n.s. 0.1	neg	5
3DAP CPT	3DAP CPT vs. all	ATLAS	level_2_annotation_timed	LCR_modsc1	0.2194053420590791	0.00560323	-0.00161816	0.2655512749013889	n.s.	pos	5
3DAP OVL	3DAP OVL vs. all	ATLAS	level_2_annotation_timed	LCR_modsc1	0.22649961682765526	-0.00948901	-0.00155597	0.2655512749013889	n.s.	neg	5
3DAP FUN	3DAP FUN vs. all	ATLAS	level_2_annotation_timed	LCR_modsc1	0.21218499873914293	0.00607991	-0.00162676	0.2655512749013889	n.s.	pos	5
3DAP ii1'	3DAP ii1' vs. all	ATLAS	level_2_annotation_timed	LCR_modsc1	0.00899397	-0.0268582	-0.00117623	0.025482922204696775	*	neg	5
3DAP CZE	3DAP CZE vs. all	ATLAS	level_2_annotation_timed	LCR_modsc1	2.1694362790001777e-8	0.21049425928714505	-0.0028555	3.688041674300302e-7	****	pos	5
5DAP PEN	5DAP PEN vs. all	ATLAS	level_2_annotation_timed	LCR_modsc1	0.5191556842426651	0.00156129	-0.0025729	0.5191556842426651	n.s.	pos	5
5DAP ii2	5DAP ii2 vs. all	ATLAS	level_2_annotation_timed	LCR_modsc1	0.00713556	-0.0216405	-0.00135743	0.0242609	*	neg	5
5DAP oi1	5DAP oi1 vs. all	ATLAS	level_2_annotation_timed	LCR_modsc1	0.00225563	-0.0208848	7.222075384612854e-4	0.010955902308411017	*	neg	5
5DAP oi2	5DAP oi2 vs. all	ATLAS	level_2_annotation_timed	LCR_modsc1	0.34026102021988097	-0.0079497	-0.00148711	0.37318950604761136	n.s.	neg	5
5DAP CZSC	5DAP CZSC vs. all	ATLAS	level_2_annotation_timed	LCR_modsc1	0.290827	-0.00758549	-0.00158677	0.32960385115714325	n.s.	neg	5
5DAP MCE	5DAP MCE vs. all	ATLAS	level_2_annotation_timed	LCR_modsc1	0.00154405	0.028107511098536816	-0.00195651	0.00874962	**	pos	5
5DAP CZE	5DAP CZE vs. all	ATLAS	level_2_annotation_timed	LCR_modsc1	8.993394266351963e-6	0.0812852	-0.00276842	1.0192513501865558e-4	***	pos	5
5DAP ii1	5DAP ii1 vs. all	ATLAS	level_2_annotation_timed	LCR_modsc1	0.023931	-0.0168094	-0.00148301	0.052036724021989195	n.s. 0.1	neg	5
5DAP ii1'	5DAP ii1' vs. all	ATLAS	level_2_annotation_timed	LCR_modsc1	0.00632721	-0.0238713	-0.00148042	0.0239028	*	neg	5
5DAP CPT	5DAP CPT vs. all	ATLAS	level_2_annotation_timed	LCR_modsc1	0.4500313043675228	0.00269003	-0.00165092	0.4636686166210841	n.s.	pos	5
5DAP EMB	5DAP EMB vs. all	ATLAS	level_2_annotation_timed	LCR_modsc1	0.00825376	-0.0211981	-0.00146833	0.025482922204696775	*	neg	5
5DAP FUN	5DAP FUN vs. all	ATLAS	level_2_annotation_timed	LCR_modsc1	0.0862759	-0.0126208	-0.00158717	0.12753824218409476	n.s.	neg	5
7DAP oi2	7DAP oi2 vs. all	ATLAS	level_2_annotation_timed	LCR_modsc1	0.0328638	-0.0157251	-0.00138045	0.0588089	n.s. 0.1	neg	5
7DAP EMB	7DAP EMB vs. all	ATLAS	level_2_annotation_timed	LCR_modsc1	0.0607774	-0.0135969	0.00104693	0.0984015	n.s. 0.1	neg	5
7DAP MCE	7DAP MCE vs. all	ATLAS	level_2_annotation_timed	LCR_modsc1	0.00344899	0.021962632165108836	-0.00271331	0.0146582	*	pos	5
7DAP CZE	7DAP CZE vs. all	ATLAS	level_2_annotation_timed	LCR_modsc1	0.019178226824817488	0.015696979241920997	-0.00246248	0.046575693717413894	*	pos	5
7DAP oi1	7DAP oi1 vs. all	ATLAS	level_2_annotation_timed	LCR_modsc1	0.030112139223020116	-0.015835	-0.000806161	0.056878485199037994	n.s. 0.1	neg	5
7DAP PEN	7DAP PEN vs. all	ATLAS	level_2_annotation_timed	LCR_modsc1	8.054715397582793e-4	0.0318409	-0.00279515	0.00547721	**	pos	5
7DAP ii1'	7DAP ii1' vs. all	ATLAS	level_2_annotation_timed	LCR_modsc1	0.014210284331230635	-0.0192394	-0.00147799	0.0371654	*	neg	5
7DAP CZSC	7DAP CZSC vs. all	ATLAS	level_2_annotation_timed	LCR_modsc1	0.21862865737115222	-0.00872872	-0.00150373	0.2655512749013889	n.s.	neg	5
7DAP ii1	7DAP ii1 vs. all	ATLAS	level_2_annotation_timed	LCR_modsc1	0.028870390653296458	-0.0166121	-0.00146562	0.056878485199037994	n.s. 0.1	neg	5
3DAP MCE	3DAP MCE vs. all	ATLAS	level_2_annotation_timed	TPD_modsc1	8.081199620643853e-7	0.22085135893103197	-0.00468025	2.7476078710189102e-5	****	pos	5
3DAP ii1	3DAP ii1 vs. all	ATLAS	level_2_annotation_timed	TPD_modsc1	0.8812444133353847	-0.00344747	-0.00124093	0.8997639677363478	n.s.	neg	5
3DAP oi1	3DAP oi1 vs. all	ATLAS	level_2_annotation_timed	TPD_modsc1	0.8147754058364522	0.00377038	4.082252574128699e-5	0.8656988687012305	n.s.	pos	5
3DAP PEN	3DAP PEN vs. all	ATLAS	level_2_annotation_timed	TPD_modsc1	9.517903388793976e-6	0.23166917962122868	-0.00602895	1.618043576094976e-4	***	pos	5
3DAP ii2	3DAP ii2 vs. all	ATLAS	level_2_annotation_timed	TPD_modsc1	0.7621437708812796	-0.00593878	-0.00174151	0.8550896459281746	n.s.	neg	5
3DAP EMB	3DAP EMB vs. all	ATLAS	level_2_annotation_timed	TPD_modsc1	0.022776823873416202	0.0406449	-0.00249565	0.15488240233923017	n.s.	pos	5
3DAP CZSC	3DAP CZSC vs. all	ATLAS	level_2_annotation_timed	TPD_modsc1	0.40306421042577745	-0.0140134	-0.00161484	0.6232472488141557	n.s.	neg	5
3DAP oi2	3DAP oi2 vs. all	ATLAS	level_2_annotation_timed	TPD_modsc1	0.4664112164513037	-0.0117369	-0.00068085	0.6273009430318609	n.s.	neg	5
3DAP CPT	3DAP CPT vs. all	ATLAS	level_2_annotation_timed	TPD_modsc1	0.47970072114201123	-0.0115711	-0.0021323	0.6273009430318609	n.s.	neg	5
3DAP OVL	3DAP OVL vs. all	ATLAS	level_2_annotation_timed	TPD_modsc1	0.8997639677363478	-0.000691995	-0.00233891	0.8997639677363478	n.s.	pos	5
3DAP FUN	3DAP FUN vs. all	ATLAS	level_2_annotation_timed	TPD_modsc1	0.3888453695685259	0.00978394	-0.00232733	0.6232472488141557	n.s.	pos	5
3DAP ii1'	3DAP ii1' vs. all	ATLAS	level_2_annotation_timed	TPD_modsc1	0.5580193758712826	-0.00985998	-0.0020097	0.6775949564151288	n.s.	neg	5
3DAP CZE	3DAP CZE vs. all	ATLAS	level_2_annotation_timed	TPD_modsc1	0.0020177	0.0758054	-0.00275071	0.017150439057183223	*	pos	5
5DAP PEN	5DAP PEN vs. all	ATLAS	level_2_annotation_timed	TPD_modsc1	0.0849928	-0.0245813	-0.000837648	0.4128223249375116	n.s.	neg	5
5DAP ii2	5DAP ii2 vs. all	ATLAS	level_2_annotation_timed	TPD_modsc1	0.22693707926113055	-0.0186992	-0.00232821	0.5456542338003878	n.s.	neg	5
5DAP oi1	5DAP oi1 vs. all	ATLAS	level_2_annotation_timed	TPD_modsc1	0.4600548035316667	-0.012395	-0.00259785	0.6273009430318609	n.s.	neg	5
5DAP oi2	5DAP oi2 vs. all	ATLAS	level_2_annotation_timed	TPD_modsc1	0.5832787300790123	0.00639241	-0.00330268	0.6838440283684971	n.s.	pos	5
5DAP CZSC	5DAP CZSC vs. all	ATLAS	level_2_annotation_timed	TPD_modsc1	0.16569203525139484	-0.0214517	-0.0022845	0.5121390180497658	n.s.	neg	5
5DAP MCE	5DAP MCE vs. all	ATLAS	level_2_annotation_timed	TPD_modsc1	0.10892501193844452	-0.0250711	-0.00226593	0.46293130073838923	n.s.	neg	5
5DAP CZE	5DAP CZE vs. all	ATLAS	level_2_annotation_timed	TPD_modsc1	0.13973055203743145	-0.0229575	-0.00228743	0.5105872037465718	n.s.	neg	5
5DAP ii1	5DAP ii1 vs. all	ATLAS	level_2_annotation_timed	TPD_modsc1	0.24072980902958285	-0.0181725	-0.00234133	0.5456542338003878	n.s.	neg	5
5DAP ii1'	5DAP ii1' vs. all	ATLAS	level_2_annotation_timed	TPD_modsc1	0.15017270698428584	-0.0226206	-0.0023345	0.5105872037465718	n.s.	neg	5
5DAP CPT	5DAP CPT vs. all	ATLAS	level_2_annotation_timed	TPD_modsc1	0.21583927021756333	-0.0192439	-0.00236993	0.5456542338003878	n.s.	neg	5
5DAP EMB	5DAP EMB vs. all	ATLAS	level_2_annotation_timed	TPD_modsc1	9.360782822515697e-4	0.0733086	-0.0031505	0.010608887198851124	*	pos	5
5DAP FUN	5DAP FUN vs. all	ATLAS	level_2_annotation_timed	TPD_modsc1	0.0339302	-0.0358959	-0.00235497	0.1922711405416317	n.s.	neg	5
7DAP oi2	7DAP oi2 vs. all	ATLAS	level_2_annotation_timed	TPD_modsc1	0.31700119390360904	-0.0156437	-0.00233078	0.5987800329290393	n.s.	neg	5
7DAP EMB	7DAP EMB vs. all	ATLAS	level_2_annotation_timed	TPD_modsc1	0.7796405595227475	-0.00690701	-0.00321285	0.8550896459281746	n.s.	neg	5
7DAP MCE	7DAP MCE vs. all	ATLAS	level_2_annotation_timed	TPD_modsc1	0.4611551543478838	-0.0119668	-0.00237074	0.6273009430318609	n.s.	neg	5
7DAP CZE	7DAP CZE vs. all	ATLAS	level_2_annotation_timed	TPD_modsc1	0.33704575008654397	-0.0148972	-0.00219225	0.6031345001548681	n.s.	neg	5
7DAP oi1	7DAP oi1 vs. all	ATLAS	level_2_annotation_timed	TPD_modsc1	0.4032776315856302	-0.013234	-0.00228978	0.6232472488141557	n.s.	neg	5
7DAP PEN	7DAP PEN vs. all	ATLAS	level_2_annotation_timed	TPD_modsc1	0.5083497155787078	-0.0110625	-0.00240353	0.6401440862842988	n.s.	neg	5
7DAP ii1'	7DAP ii1' vs. all	ATLAS	level_2_annotation_timed	TPD_modsc1	0.2827099608861441	-0.0169415	-0.00235738	0.5903476496456369	n.s.	neg	5
7DAP CZSC	7DAP CZSC vs. all	ATLAS	level_2_annotation_timed	TPD_modsc1	0.29517382482281845	-0.0162909	-0.00233587	0.5903476496456369	n.s.	neg	5
7DAP ii1	7DAP ii1 vs. all	ATLAS	level_2_annotation_timed	TPD_modsc1	0.18789199656860453	-0.0203769	-0.00231891	0.5323606569443795	n.s.	neg	5
3DAP MCE	3DAP MCE vs. all	ATLAS	level_2_annotation_timed	CLE_modsc1	0.0022393	0.019773687836887235	-0.00202278	0.025378710919966324	*	pos	5
3DAP ii1	3DAP ii1 vs. all	ATLAS	level_2_annotation_timed	CLE_modsc1	0.21908043892738452	0.00449178	-0.00182157	0.8316826625337639	n.s.	pos	5
3DAP oi1	3DAP oi1 vs. all	ATLAS	level_2_annotation_timed	CLE_modsc1	0.7350905159973617	8.479446950673952e-4	-0.00106854	0.9634857054154767	n.s.	pos	5
3DAP PEN	3DAP PEN vs. all	ATLAS	level_2_annotation_timed	CLE_modsc1	8.360795133078023e-5	0.039897344781472416	-0.00245455	0.00142134	**	pos	5
3DAP ii2	3DAP ii2 vs. all	ATLAS	level_2_annotation_timed	CLE_modsc1	0.8082465285885471	-0.000451556	-0.0017101	0.9647385889928188	n.s.	pos	5
3DAP EMB	3DAP EMB vs. all	ATLAS	level_2_annotation_timed	CLE_modsc1	0.35650984097083877	-0.00741484	-0.00180733	0.8430785820675495	n.s.	neg	5
3DAP CZSC	3DAP CZSC vs. all	ATLAS	level_2_annotation_timed	CLE_modsc1	0.49362787847838097	0.00157064	-0.00177506	0.8706279770148719	n.s.	pos	5
3DAP oi2	3DAP oi2 vs. all	ATLAS	level_2_annotation_timed	CLE_modsc1	0.9389809052698858	-0.0018437	-0.00144419	0.9879829325030789	n.s.	neg	5
3DAP CPT	3DAP CPT vs. all	ATLAS	level_2_annotation_timed	CLE_modsc1	0.7367831864941881	-0.000232919	-0.00181715	0.9634857054154767	n.s.	pos	5
3DAP OVL	3DAP OVL vs. all	ATLAS	level_2_annotation_timed	CLE_modsc1	0.9879829325030789	-0.00175973	-0.00185621	0.9879829325030789	n.s.	pos	5
3DAP FUN	3DAP FUN vs. all	ATLAS	level_2_annotation_timed	CLE_modsc1	0.8933464227208312	-0.00118972	-0.0018123	0.979799	n.s.	pos	5
3DAP ii1'	3DAP ii1' vs. all	ATLAS	level_2_annotation_timed	CLE_modsc1	0.8228652670821103	-0.000637595	-0.00178324	0.9647385889928188	n.s.	pos	5
3DAP CZE	3DAP CZE vs. all	ATLAS	level_2_annotation_timed	CLE_modsc1	8.93877712731715e-6	0.12185428644230825	-0.00257595	3.039184223287831e-4	***	pos	5
5DAP PEN	5DAP PEN vs. all	ATLAS	level_2_annotation_timed	CLE_modsc1	0.241351	-0.00753758	-0.00172585	0.8316826625337639	n.s.	neg	5
5DAP ii2	5DAP ii2 vs. all	ATLAS	level_2_annotation_timed	CLE_modsc1	0.47049143573579855	-0.00530989	-0.00187025	0.8706279770148719	n.s.	neg	5
5DAP oi1	5DAP oi1 vs. all	ATLAS	level_2_annotation_timed	CLE_modsc1	0.7235425824768345	-0.00389533	-0.00219214	0.9634857054154767	n.s.	neg	5
5DAP oi2	5DAP oi2 vs. all	ATLAS	level_2_annotation_timed	CLE_modsc1	0.3000323694297436	-0.00679565	-0.00182688	0.8316826625337639	n.s.	neg	5
5DAP CZSC	5DAP CZSC vs. all	ATLAS	level_2_annotation_timed	CLE_modsc1	0.31799631214526264	-0.00661715	-0.00185631	0.8316826625337639	n.s.	neg	5
5DAP MCE	5DAP MCE vs. all	ATLAS	level_2_annotation_timed	CLE_modsc1	0.7073553213147599	-0.00361863	-0.00188895	0.9634857054154767	n.s.	neg	5
5DAP CZE	5DAP CZE vs. all	ATLAS	level_2_annotation_timed	CLE_modsc1	0.0240877	-0.0185168	-0.00173391	0.20474560570691544	n.s.	neg	5
5DAP ii1	5DAP ii1 vs. all	ATLAS	level_2_annotation_timed	CLE_modsc1	0.9643115729698017	-0.00211467	-0.00190925	0.9879829325030789	n.s.	neg	5
5DAP ii1'	5DAP ii1' vs. all	ATLAS	level_2_annotation_timed	CLE_modsc1	0.23565459137623532	-0.0079432	-0.00185964	0.8316826625337639	n.s.	neg	5
5DAP CPT	5DAP CPT vs. all	ATLAS	level_2_annotation_timed	CLE_modsc1	0.5121341041263953	-0.00500288	-0.00186976	0.8706279770148719	n.s.	neg	5
5DAP EMB	5DAP EMB vs. all	ATLAS	level_2_annotation_timed	CLE_modsc1	0.48629515407000967	-0.00512474	-0.00187343	0.8706279770148719	n.s.	neg	5
5DAP FUN	5DAP FUN vs. all	ATLAS	level_2_annotation_timed	CLE_modsc1	0.5931724440695538	8.008687840000005e-4	-0.0018771	0.9177325776570096	n.s.	pos	5
7DAP oi2	7DAP oi2 vs. all	ATLAS	level_2_annotation_timed	CLE_modsc1	0.5938269620133592	-0.00436417	-0.00187984	0.9177325776570096	n.s.	neg	5
7DAP EMB	7DAP EMB vs. all	ATLAS	level_2_annotation_timed	CLE_modsc1	0.8788887442560307	-0.00293733	-0.00219876	0.979799	n.s.	neg	5
7DAP MCE	7DAP MCE vs. all	ATLAS	level_2_annotation_timed	CLE_modsc1	0.37194643326509536	-0.00604064	-0.00181363	0.8430785820675495	n.s.	neg	5
7DAP CZE	7DAP CZE vs. all	ATLAS	level_2_annotation_timed	CLE_modsc1	0.17537811904885764	-0.00844546	-0.00167551	0.8316826625337639	n.s.	neg	5
7DAP oi1	7DAP oi1 vs. all	ATLAS	level_2_annotation_timed	CLE_modsc1	0.41393723762136847	-0.0056688	-0.00182738	0.8706279770148719	n.s.	neg	5
7DAP PEN	7DAP PEN vs. all	ATLAS	level_2_annotation_timed	CLE_modsc1	0.8096649244689758	-0.00306831	-0.00194194	0.9647385889928188	n.s.	neg	5
7DAP ii1'	7DAP ii1' vs. all	ATLAS	level_2_annotation_timed	CLE_modsc1	0.29461082305392317	-0.00690894	-0.00185624	0.8316826625337639	n.s.	neg	5
7DAP CZSC	7DAP CZSC vs. all	ATLAS	level_2_annotation_timed	CLE_modsc1	0.24486004060060623	-0.00746866	-0.00183935	0.8316826625337639	n.s.	neg	5
7DAP ii1	7DAP ii1 vs. all	ATLAS	level_2_annotation_timed	CLE_modsc1	0.20950937015314178	-0.0081798	-0.00184373	0.8316826625337639	n.s.	neg	5
3DAP MCE	3DAP MCE vs. all	ATLAS	level_2_annotation_timed	PMEI_modsc1	3.620579216786114e-5	0.3249935692357545	9.501867190756383e-4	0.001231	**	pos	5
3DAP ii1	3DAP ii1 vs. all	ATLAS	level_2_annotation_timed	PMEI_modsc1	0.00237965	0.14032463732955403	-0.000614375	0.040454	*	pos	5
3DAP oi1	3DAP oi1 vs. all	ATLAS	level_2_annotation_timed	PMEI_modsc1	0.6791406825738364	0.0267131	0.00955974	0.7919251192856155	n.s.	pos	5
3DAP PEN	3DAP PEN vs. all	ATLAS	level_2_annotation_timed	PMEI_modsc1	0.11135810648102633	0.0650075	0.003796	0.589699	n.s.	pos	5
3DAP ii2	3DAP ii2 vs. all	ATLAS	level_2_annotation_timed	PMEI_modsc1	0.19434509370875477	0.052511757045402375	0.00408142	0.589699	n.s.	pos	5
3DAP EMB	3DAP EMB vs. all	ATLAS	level_2_annotation_timed	PMEI_modsc1	0.29668421318156696	0.041638855696786325	0.0039838	0.6304539530108297	n.s.	pos	5
3DAP CZSC	3DAP CZSC vs. all	ATLAS	level_2_annotation_timed	PMEI_modsc1	0.6900140401782722	0.019304212785720868	0.00488039	0.7919251192856155	n.s.	pos	5
3DAP oi2	3DAP oi2 vs. all	ATLAS	level_2_annotation_timed	PMEI_modsc1	0.8033106842771883	0.015794854217203252	0.00642611	0.8535176020445125	n.s.	pos	5
3DAP CPT	3DAP CPT vs. all	ATLAS	level_2_annotation_timed	PMEI_modsc1	0.20123884839564551	0.0512319	0.00397774	0.589699	n.s.	pos	5
3DAP OVL	3DAP OVL vs. all	ATLAS	level_2_annotation_timed	PMEI_modsc1	0.3301815580681097	0.0389181	0.00397493	0.6470054100877095	n.s.	pos	5
3DAP FUN	3DAP FUN vs. all	ATLAS	level_2_annotation_timed	PMEI_modsc1	0.10223075411555234	0.066962	0.00383129	0.589699	n.s.	pos	5
3DAP ii1'	3DAP ii1' vs. all	ATLAS	level_2_annotation_timed	PMEI_modsc1	0.13749805554983224	0.0608865	0.00387577	0.589699	n.s.	pos	5
3DAP CZE	3DAP CZE vs. all	ATLAS	level_2_annotation_timed	PMEI_modsc1	0.0707134	0.0756064	0.00380802	0.589699	n.s.	pos	5
5DAP PEN	5DAP PEN vs. all	ATLAS	level_2_annotation_timed	PMEI_modsc1	0.3733332576759029	-0.0255772	0.00567489	0.6470054100877095	n.s.	neg	5
5DAP ii2	5DAP ii2 vs. all	ATLAS	level_2_annotation_timed	PMEI_modsc1	0.5940703184408311	-0.0146621	0.00394619	0.7768611856533946	n.s.	neg	5
5DAP oi1	5DAP oi1 vs. all	ATLAS	level_2_annotation_timed	PMEI_modsc1	0.4023620999514427	-0.0235433	0.00575623	0.6514433999213833	n.s.	neg	5
5DAP oi2	5DAP oi2 vs. all	ATLAS	level_2_annotation_timed	PMEI_modsc1	0.5412351102682695	0.023781	0.00205838	0.7360797499648466	n.s.	pos	5
5DAP CZSC	5DAP CZSC vs. all	ATLAS	level_2_annotation_timed	PMEI_modsc1	0.4967057942173714	-0.0200315	0.00402027	0.7360797499648466	n.s.	neg	5
5DAP MCE	5DAP MCE vs. all	ATLAS	level_2_annotation_timed	PMEI_modsc1	0.5276119986505106	-0.018059	0.00395654	0.7360797499648466	n.s.	neg	5
5DAP CZE	5DAP CZE vs. all	ATLAS	level_2_annotation_timed	PMEI_modsc1	0.9488132109358166	0.00590913	0.00370695	0.9488132109358166	n.s.	pos	5
5DAP ii1	5DAP ii1 vs. all	ATLAS	level_2_annotation_timed	PMEI_modsc1	0.3805914176986527	0.034629830806707576	0.00338215	0.6470054100877095	n.s.	pos	5
5DAP ii1'	5DAP ii1' vs. all	ATLAS	level_2_annotation_timed	PMEI_modsc1	0.6396260528235327	-0.012645	0.0039031	0.7919251192856155	n.s.	neg	5
5DAP CPT	5DAP CPT vs. all	ATLAS	level_2_annotation_timed	PMEI_modsc1	0.6987574581931901	0.0173631	0.00374442	0.7919251192856155	n.s.	pos	5
5DAP EMB	5DAP EMB vs. all	ATLAS	level_2_annotation_timed	PMEI_modsc1	0.9269440531945153	0.00694705	0.00375072	0.9488132109358166	n.s.	pos	5
5DAP FUN	5DAP FUN vs. all	ATLAS	level_2_annotation_timed	PMEI_modsc1	0.7801323318737073	-0.00583503	0.00390187	0.8535176020445125	n.s.	neg	5
7DAP oi2	7DAP oi2 vs. all	ATLAS	level_2_annotation_timed	PMEI_modsc1	0.2487993116648074	-0.0379461	0.00396682	0.589699	n.s.	neg	5
7DAP EMB	7DAP EMB vs. all	ATLAS	level_2_annotation_timed	PMEI_modsc1	0.24181583639066417	-0.0374904	0.00455195	0.589699	n.s.	neg	5
7DAP MCE	7DAP MCE vs. all	ATLAS	level_2_annotation_timed	PMEI_modsc1	0.528342	-0.0191829	0.003181	0.7360797499648466	n.s.	neg	5
7DAP CZE	7DAP CZE vs. all	ATLAS	level_2_annotation_timed	PMEI_modsc1	0.25287939742085397	-0.0373463	0.00409318	0.589699	n.s.	neg	5
7DAP oi1	7DAP oi1 vs. all	ATLAS	level_2_annotation_timed	PMEI_modsc1	0.2601614328936216	-0.0366809	0.00403307	0.589699	n.s.	neg	5
7DAP PEN	7DAP PEN vs. all	ATLAS	level_2_annotation_timed	PMEI_modsc1	0.3667886972842796	-0.0285202	0.0037028	0.6470054100877095	n.s.	neg	5
7DAP ii1'	7DAP ii1' vs. all	ATLAS	level_2_annotation_timed	PMEI_modsc1	0.22757218681545444	-0.0401314	0.00394879	0.589699	n.s.	neg	5
7DAP CZSC	7DAP CZSC vs. all	ATLAS	level_2_annotation_timed	PMEI_modsc1	0.24316790279587766	-0.0384778	0.00396101	0.589699	n.s.	neg	5
7DAP ii1	7DAP ii1 vs. all	ATLAS	level_2_annotation_timed	PMEI_modsc1	0.24490353466928153	-0.0383376	0.00394626	0.589699	n.s.	neg	5
3DAP 5. MCE (ARF13)	3DAP 5. MCE (ARF13) vs. all	ATLAS	level_3_annotation_full_timed	significant_m2am1a_LRT_genes	0.0291274	0.00338251	-0.00131203	0.0557676	n.s. 0.1	pos	6
3DAP 17. ii1 endothelium (BAN and TT1)	3DAP 17. ii1 endothelium (BAN and TT1) vs. all	ATLAS	level_3_annotation_full_timed	significant_m2am1a_LRT_genes	1.18198321995063e-07	-0.0184718	-0.000620392	4.60973455780747e-06	****	neg	6
3DAP 21. oi1 flavinol synthesizing (MYB11)	3DAP 21. oi1 flavinol synthesizing (MYB11) vs. all	ATLAS	level_3_annotation_full_timed	significant_m2am1a_LRT_genes	0.737843	-0.00100614	-0.0014186	0.79933	n.s.	pos	6
3DAP 6. PEN general (AGL62)	3DAP 6. PEN general (AGL62) vs. all	ATLAS	level_3_annotation_full_timed	significant_m2am1a_LRT_genes	5.87555085036694e-06	0.0185575	-0.00154898	7.63821610547702e-05	****	pos	6
3DAP 20. ii2 general (DELTAVPE and STK)	3DAP 20. ii2 general (DELTAVPE and STK) vs. all	ATLAS	level_3_annotation_full_timed	significant_m2am1a_LRT_genes	0.00372486	-0.00611075	-0.00115766	0.0111746	*	neg	6
3DAP 1. EMB (PDF1)	3DAP 1. EMB (PDF1) vs. all	ATLAS	level_3_annotation_full_timed	significant_m2am1a_LRT_genes	0.243994	-0.00339755	-0.00124556	0.321087	n.s.	neg	6
3DAP 22. oi1 flavinol synthesizing high PCD (MYB11, SCOOP15, BAP1)	3DAP 22. oi1 flavinol synthesizing high PCD (MYB11, SCOOP15, BAP1) vs. all	ATLAS	level_3_annotation_full_timed	significant_m2am1a_LRT_genes	0.24699	-0.00254553	-0.00125097	0.321087	n.s.	neg	6
3DAP 15. CZSC placentochalazal phosphate transport (ARR22, SWEET10, and UMAMIT14)	3DAP 15. CZSC placentochalazal phosphate transport (ARR22, SWEET10, and UMAMIT14) vs. all	ATLAS	level_3_annotation_full_timed	significant_m2am1a_LRT_genes	0.0179055	-0.0044346	-0.00123479	0.0377468	*	neg	6
3DAP 25. oi2 general (GLABRA2)	3DAP 25. oi2 general (GLABRA2) vs. all	ATLAS	level_3_annotation_full_timed	significant_m2am1a_LRT_genes	0.225845	-0.00290382	-0.00124258	0.309051	n.s.	neg	6
3DAP 16. CZSC placentochalazal callose-synthesizing (ARR22, TET5, and CALS8)	3DAP 16. CZSC placentochalazal callose-synthesizing (ARR22, TET5, and CALS8) vs. all	ATLAS	level_3_annotation_full_timed	significant_m2am1a_LRT_genes	0.0888519	-0.00336675	-0.00124419	0.130763	n.s.	neg	6
3DAP 18. ii1 basal (contains pigment strand) (BAN and SWEET4)	3DAP 18. ii1 basal (contains pigment strand) (BAN and SWEET4) vs. all	ATLAS	level_3_annotation_full_timed	significant_m2am1a_LRT_genes	0.0457264	-0.0037208	-0.00123541	0.0790428	n.s. 0.1	neg	6
3DAP 27. oi2 general (GLABRA2 and WRKY40)	3DAP 27. oi2 general (GLABRA2 and WRKY40) vs. all	ATLAS	level_3_annotation_full_timed	significant_m2am1a_LRT_genes	0.264174	-0.00252078	-0.00124951	0.337797	n.s.	neg	6
3DAP 23. oi1 flavinol synthesizing S-phase (MYB11 and BARD1)	3DAP 23. oi1 flavinol synthesizing S-phase (MYB11 and BARD1) vs. all	ATLAS	level_3_annotation_full_timed	significant_m2am1a_LRT_genes	0.647076	-0.000756039	-0.00126639	0.731478	n.s.	pos	6
3DAP 13. CPT persistent nucellus (AGO3)	3DAP 13. CPT persistent nucellus (AGO3) vs. all	ATLAS	level_3_annotation_full_timed	significant_m2am1a_LRT_genes	0.0166539	-0.00470569	-0.00123604	0.0360834	*	neg	6
3DAP 14. CZSC fluid transport (ARR22 and AAP6)	3DAP 14. CZSC fluid transport (ARR22 and AAP6) vs. all	ATLAS	level_3_annotation_full_timed	significant_m2am1a_LRT_genes	0.0321751	0.00171746	-0.00129821	0.0597537	n.s. 0.1	pos	6
3DAP 26. oi2 very long chain fatty acid-synthesizing (KCS6 and WRI4)	3DAP 26. oi2 very long chain fatty acid-synthesizing (KCS6 and WRI4) vs. all	ATLAS	level_3_annotation_full_timed	significant_m2am1a_LRT_genes	0.803402	-0.00152588	-0.00126286	0.85137	n.s.	neg	6
3DAP 12. CPT transient nucellus (PLL24)	3DAP 12. CPT transient nucellus (PLL24) vs. all	ATLAS	level_3_annotation_full_timed	significant_m2am1a_LRT_genes	0.000421718	-0.00853166	-0.00122666	0.00205588	**	neg	6
3DAP 11. OVL scenescing (BFN1)	3DAP 11. OVL scenescing (BFN1) vs. all	ATLAS	level_3_annotation_full_timed	significant_m2am1a_LRT_genes	0.00108542	-0.00703559	-0.00123481	0.00423315	**	neg	6
3DAP 9. FUN epidermal (CER3)	3DAP 9. FUN epidermal (CER3) vs. all	ATLAS	level_3_annotation_full_timed	significant_m2am1a_LRT_genes	6.95580376296607e-06	-0.0176875	-0.00120168	7.75075276444791e-05	****	neg	6
3DAP 19. ii1' (DELTAVPE and UMAMIT29)	3DAP 19. ii1' (DELTAVPE and UMAMIT29) vs. all	ATLAS	level_3_annotation_full_timed	significant_m2am1a_LRT_genes	0.422693	-0.00223605	-0.00125467	0.499546	n.s.	neg	6
3DAP 28. oi2 S-phase (GLABRA2 and BARD1)	3DAP 28. oi2 S-phase (GLABRA2 and BARD1) vs. all	ATLAS	level_3_annotation_full_timed	significant_m2am1a_LRT_genes	0.236648	0.000481318	-0.00126629	0.318251	n.s.	pos	6
3DAP 24. oi1 micropylar (SWEET12)	3DAP 24. oi1 micropylar (SWEET12) vs. all	ATLAS	level_3_annotation_full_timed	significant_m2am1a_LRT_genes	0.0855022	-0.00342511	-0.00124094	0.128253	n.s.	neg	6
3DAP 7. PEN G2/M-phase (AGL62 and TOPII)	3DAP 7. PEN G2/M-phase (AGL62 and TOPII) vs. all	ATLAS	level_3_annotation_full_timed	significant_m2am1a_LRT_genes	2.55343218491901e-05	0.0210398	-0.00131229	0.000221297	***	pos	6
3DAP 2. CZE nodule-like (MEA)	3DAP 2. CZE nodule-like (MEA) vs. all	ATLAS	level_3_annotation_full_timed	significant_m2am1a_LRT_genes	2.82809118051241e-06	0.0202532	-0.00131114	5.51477780199921e-05	****	pos	6
3DAP 4. CZE nodule (CYCD4;2)	3DAP 4. CZE nodule (CYCD4;2) vs. all	ATLAS	level_3_annotation_full_timed	significant_m2am1a_LRT_genes	5.41316748425277e-06	0.0285314	-0.00131555	7.63821610547702e-05	****	pos	6
3DAP 3. CZE basal cyst (RALFL3)	3DAP 3. CZE basal cyst (RALFL3) vs. all	ATLAS	level_3_annotation_full_timed	significant_m2am1a_LRT_genes	0.00367458	-0.0148605	-0.00123548	0.0111746	*	neg	6
3DAP 8. FUN hilum (ADPG1)	3DAP 8. FUN hilum (ADPG1) vs. all	ATLAS	level_3_annotation_full_timed	significant_m2am1a_LRT_genes	0.00162681	-0.00651044	-0.00122809	0.00576778	**	neg	6
3DAP 10. FUN companion cells (SUC2)	3DAP 10. FUN companion cells (SUC2) vs. all	ATLAS	level_3_annotation_full_timed	significant_m2am1a_LRT_genes	5.54333032654276e-05	-0.0166876	-0.00123779	0.000393073	***	neg	6
5DAP 7. PEN general I (IMK2)	5DAP 7. PEN general I (IMK2) vs. all	ATLAS	level_3_annotation_full_timed	significant_m2am1a_LRT_genes	0.198971	-0.00378508	-0.00115992	0.277139	n.s.	neg	6
5DAP 20. ii2 general (DELTAVPE and STK)	5DAP 20. ii2 general (DELTAVPE and STK) vs. all	ATLAS	level_3_annotation_full_timed	significant_m2am1a_LRT_genes	0.949389	-0.00115271	-0.00123451	0.955868	n.s.	pos	6
5DAP 22. oi1 basal (MYB11 and PIN3)	5DAP 22. oi1 basal (MYB11 and PIN3) vs. all	ATLAS	level_3_annotation_full_timed	significant_m2am1a_LRT_genes	0.955868	-0.00129172	-0.00123363	0.955868	n.s.	neg	6
5DAP 26. oi2 LTP-enriched (LTP1)	5DAP 26. oi2 LTP-enriched (LTP1) vs. all	ATLAS	level_3_annotation_full_timed	significant_m2am1a_LRT_genes	4.47011365781872e-05	-0.0232565	-0.000756057	0.000348669	***	neg	6
5DAP 21. oi1 flavinol synthesizing (MYB11)	5DAP 21. oi1 flavinol synthesizing (MYB11) vs. all	ATLAS	level_3_annotation_full_timed	significant_m2am1a_LRT_genes	0.193075	0.000200968	-0.00134741	0.273816	n.s.	pos	6
5DAP 23. oi1 flavinol synthesizing high PCD (MYB11, SCOOP15, BAP1)	5DAP 23. oi1 flavinol synthesizing high PCD (MYB11, SCOOP15, BAP1) vs. all	ATLAS	level_3_annotation_full_timed	significant_m2am1a_LRT_genes	0.71164	-0.000856551	-0.00124508	0.781802	n.s.	pos	6
5DAP 10. PEN general V (PTR3)	5DAP 10. PEN general V (PTR3) vs. all	ATLAS	level_3_annotation_full_timed	significant_m2am1a_LRT_genes	0.0137964	0.00385943	-0.00131504	0.0326097	*	pos	6
5DAP 15. CZSC placentochalazal phosphate transport (ARR22, SWEET10, and UMAMIT14)	5DAP 15. CZSC placentochalazal phosphate transport (ARR22, SWEET10, and UMAMIT14) vs. all	ATLAS	level_3_annotation_full_timed	significant_m2am1a_LRT_genes	0.00825735	0.00282093	-0.00129138	0.0214691	*	pos	6
5DAP 6. MCE (ALE1)	5DAP 6. MCE (ALE1) vs. all	ATLAS	level_3_annotation_full_timed	significant_m2am1a_LRT_genes	0.0777312	0.00439936	-0.00129071	0.121261	n.s.	pos	6
5DAP 3. CZE apical cyst (MEE56)	5DAP 3. CZE apical cyst (MEE56) vs. all	ATLAS	level_3_annotation_full_timed	significant_m2am1a_LRT_genes	3.41325434580245e-08	0.0415478	-0.00140145	2.66233838972591e-06	****	pos	6
5DAP 8. PEN G2M-phase (MAD2)	5DAP 8. PEN G2M-phase (MAD2) vs. all	ATLAS	level_3_annotation_full_timed	significant_m2am1a_LRT_genes	0.0100154	0.00647071	-0.00137466	0.0244125	*	pos	6
5DAP 17. ii1 basal (contains pigment strand) (BAN and ARR22)	5DAP 17. ii1 basal (contains pigment strand) (BAN and ARR22) vs. all	ATLAS	level_3_annotation_full_timed	significant_m2am1a_LRT_genes	0.609257	-0.00179035	-0.00123957	0.698854	n.s.	neg	6
5DAP 24. oi1 micropylar (SWEET12)	5DAP 24. oi1 micropylar (SWEET12) vs. all	ATLAS	level_3_annotation_full_timed	significant_m2am1a_LRT_genes	0.0166323	0.00212268	-0.00126234	0.0360834	*	pos	6
5DAP 25. oi1 S-phase (MYB11 and TSO2)	5DAP 25. oi1 S-phase (MYB11 and TSO2) vs. all	ATLAS	level_3_annotation_full_timed	significant_m2am1a_LRT_genes	0.0293137	0.0015759	-0.00125299	0.0557676	n.s. 0.1	pos	6
5DAP 5. CZE nodule (CYCD4;2)	5DAP 5. CZE nodule (CYCD4;2) vs. all	ATLAS	level_3_annotation_full_timed	significant_m2am1a_LRT_genes	0.000139939	0.0334868	-0.0013811	0.000779658	***	pos	6
5DAP 11. PEN S-phase (HMGB6)	5DAP 11. PEN S-phase (HMGB6) vs. all	ATLAS	level_3_annotation_full_timed	significant_m2am1a_LRT_genes	0.00997931	0.00441893	-0.00130745	0.0244125	*	pos	6
5DAP 19. ii1' (DELTAVPE and UMAMIT29)	5DAP 19. ii1' (DELTAVPE and UMAMIT29) vs. all	ATLAS	level_3_annotation_full_timed	significant_m2am1a_LRT_genes	0.00684411	0.00297064	-0.00127192	0.0190657	*	pos	6
5DAP 14. CPT apical persistent nucellus (AGO3)	5DAP 14. CPT apical persistent nucellus (AGO3) vs. all	ATLAS	level_3_annotation_full_timed	significant_m2am1a_LRT_genes	0.00135621	-0.0104673	-0.00119103	0.00503735	**	neg	6
5DAP 9. PEN general II (NAC075)	5DAP 9. PEN general II (NAC075) vs. all	ATLAS	level_3_annotation_full_timed	significant_m2am1a_LRT_genes	0.86437	-0.000991203	-0.00123179	0.887116	n.s.	pos	6
5DAP 27. oi2 general (GLABRA2)	5DAP 27. oi2 general (GLABRA2) vs. all	ATLAS	level_3_annotation_full_timed	significant_m2am1a_LRT_genes	0.343825	-0.00232469	-0.00121452	0.419037	n.s.	neg	6
5DAP 12. PEN general IV (TGA9)	5DAP 12. PEN general IV (TGA9) vs. all	ATLAS	level_3_annotation_full_timed	significant_m2am1a_LRT_genes	0.681527	-1.63022e-05	-0.00123726	0.759415	n.s.	pos	6
5DAP 28. oi2 very long chain fatty acid-synthesizing (KCS6 and WRI4)	5DAP 28. oi2 very long chain fatty acid-synthesizing (KCS6 and WRI4) vs. all	ATLAS	level_3_annotation_full_timed	significant_m2am1a_LRT_genes	0.0677798	-0.00419893	-0.00123505	0.110142	n.s.	neg	6
5DAP 16. CZSC placentochalazal callose-synthesizing (ARR22, TET5, and CALS8)	5DAP 16. CZSC placentochalazal callose-synthesizing (ARR22, TET5, and CALS8) vs. all	ATLAS	level_3_annotation_full_timed	significant_m2am1a_LRT_genes	0.3409	-8.08153e-05	-0.00124797	0.419037	n.s.	pos	6
5DAP 1. EMB (PDF1)	5DAP 1. EMB (PDF1) vs. all	ATLAS	level_3_annotation_full_timed	significant_m2am1a_LRT_genes	0.0143398	-0.0100569	-0.00117723	0.0328971	*	neg	6
5DAP 29. oi2 S-phase (GLABRA2, TSO2)	5DAP 29. oi2 S-phase (GLABRA2, TSO2) vs. all	ATLAS	level_3_annotation_full_timed	significant_m2am1a_LRT_genes	0.0354232	0.00172135	-0.00124898	0.0627957	n.s. 0.1	pos	6
5DAP 2. CZE nodule-like (MEA)	5DAP 2. CZE nodule-like (MEA) vs. all	ATLAS	level_3_annotation_full_timed	significant_m2am1a_LRT_genes	1.35482544293762e-06	0.0173202	-0.00132618	3.52254615163781e-05	****	pos	6
5DAP 13. FUN epidermal (CER3)	5DAP 13. FUN epidermal (CER3) vs. all	ATLAS	level_3_annotation_full_timed	significant_m2am1a_LRT_genes	0.000130503	-0.0127988	-0.00122658	0.000779658	***	neg	6
5DAP 18. ii1 endothelium (BAN and TT1)	5DAP 18. ii1 endothelium (BAN and TT1) vs. all	ATLAS	level_3_annotation_full_timed	significant_m2am1a_LRT_genes	0.00439532	-0.00597001	-0.00122735	0.0126976	*	neg	6
5DAP 4. CZE basal cyst (RALFL3)	5DAP 4. CZE basal cyst (RALFL3) vs. all	ATLAS	level_3_annotation_full_timed	significant_m2am1a_LRT_genes	0.00239814	-0.0212969	-0.00121941	0.00813284	**	neg	6
7DAP 21. oi2 general (GLABRA2)	7DAP 21. oi2 general (GLABRA2) vs. all	ATLAS	level_3_annotation_full_timed	significant_m2am1a_LRT_genes	1.10082339810566e-05	0.0103535	-0.00139833	0.00010733	***	pos	6
7DAP 1. EMB inner cotyledon (XYL4)	7DAP 1. EMB inner cotyledon (XYL4) vs. all	ATLAS	level_3_annotation_full_timed	significant_m2am1a_LRT_genes	0.80771	-0.000946428	-0.00120739	0.85137	n.s.	pos	6
7DAP 12. MCE_ESR sheath promoting (ZOU, RGP3 and KRS)	7DAP 12. MCE_ESR sheath promoting (ZOU, RGP3 and KRS) vs. all	ATLAS	level_3_annotation_full_timed	significant_m2am1a_LRT_genes	0.861092	-0.00142929	-0.00122364	0.887116	n.s.	neg	6
7DAP 8. CZE photosynthetic (GA3OX4)	7DAP 8. CZE photosynthetic (GA3OX4) vs. all	ATLAS	level_3_annotation_full_timed	significant_m2am1a_LRT_genes	0.00790323	-0.00587721	-0.000984102	0.021257	*	neg	6
7DAP 6. EMB cortical initials (JKD)	7DAP 6. EMB cortical initials (JKD) vs. all	ATLAS	level_3_annotation_full_timed	significant_m2am1a_LRT_genes	0.139534	-0.0031458	-0.00122494	0.201549	n.s.	neg	6
7DAP 20. oi1 polyester monomer biosynthesis (MYB11 and CYP86B1)	7DAP 20. oi1 polyester monomer biosynthesis (MYB11 and CYP86B1) vs. all	ATLAS	level_3_annotation_full_timed	significant_m2am1a_LRT_genes	8.5031258802434e-05	0.00872591	-0.00138294	0.000552703	***	pos	6
7DAP 4. EMB vascular primordium (SHR)	7DAP 4. EMB vascular primordium (SHR) vs. all	ATLAS	level_3_annotation_full_timed	significant_m2am1a_LRT_genes	0.313977	-3.94324e-05	-0.00124728	0.395003	n.s.	pos	6
7DAP 11. MCE_ESR high PCD (ZOU and NAC074)	7DAP 11. MCE_ESR high PCD (ZOU and NAC074) vs. all	ATLAS	level_3_annotation_full_timed	significant_m2am1a_LRT_genes	0.050032	0.00122815	-0.00127508	0.0830318	n.s. 0.1	pos	6
7DAP 13. PEN (ABS6)	7DAP 13. PEN (ABS6) vs. all	ATLAS	level_3_annotation_full_timed	significant_m2am1a_LRT_genes	0.046615	-0.00397123	-0.00112116	0.0790428	n.s. 0.1	neg	6
7DAP 2. EMB protoderm (PDF1)	7DAP 2. EMB protoderm (PDF1) vs. all	ATLAS	level_3_annotation_full_timed	significant_m2am1a_LRT_genes	0.0266318	0.00174356	-0.00132963	0.0532635	n.s. 0.1	pos	6
7DAP 19. oi1 flavinol synthesizing (MYB11)	7DAP 19. oi1 flavinol synthesizing (MYB11) vs. all	ATLAS	level_3_annotation_full_timed	significant_m2am1a_LRT_genes	0.000294067	0.00543728	-0.00142062	0.00152915	**	pos	6
7DAP 18. ii1'/ii2 (DELTAVPE)	7DAP 18. ii1'/ii2 (DELTAVPE) vs. all	ATLAS	level_3_annotation_full_timed	significant_m2am1a_LRT_genes	0.0339176	0.00170148	-0.00125817	0.061525	n.s. 0.1	pos	6
7DAP 3. EMB dividing (MAD2, HMGB6)	7DAP 3. EMB dividing (MAD2, HMGB6) vs. all	ATLAS	level_3_annotation_full_timed	significant_m2am1a_LRT_genes	0.358588	-0.000252909	-0.00124336	0.430306	n.s.	pos	6
7DAP 15. CZSC general (ARR22, SWEET10, and TET5)	7DAP 15. CZSC general (ARR22, SWEET10, and TET5) vs. all	ATLAS	level_3_annotation_full_timed	significant_m2am1a_LRT_genes	0.0265072	0.00188633	-0.00126965	0.0532635	n.s. 0.1	pos	6
7DAP 5. EMB ground tissue initials (JKD, SCR)	7DAP 5. EMB ground tissue initials (JKD, SCR) vs. all	ATLAS	level_3_annotation_full_timed	significant_m2am1a_LRT_genes	0.577407	-0.000651021	-0.00124023	0.672205	n.s.	pos	6
7DAP 14. PEN dehydrin enriched (ERD10)	7DAP 14. PEN dehydrin enriched (ERD10) vs. all	ATLAS	level_3_annotation_full_timed	significant_m2am1a_LRT_genes	0.000710041	-0.00774733	-0.00121803	0.00307684	**	neg	6
7DAP 17. ii1 endothelium (BAN and TT1)	7DAP 17. ii1 endothelium (BAN and TT1) vs. all	ATLAS	level_3_annotation_full_timed	significant_m2am1a_LRT_genes	0.00351149	-0.00592834	-0.00122367	0.0111746	*	neg	6
7DAP 16. ii1 basal (contains pigment strand) (BAN and SWEET4)	7DAP 16. ii1 basal (contains pigment strand) (BAN and SWEET4) vs. all	ATLAS	level_3_annotation_full_timed	significant_m2am1a_LRT_genes	0.0794828	-0.00450678	-0.0012273	0.121562	n.s.	neg	6
7DAP 10. CZE disaccharide metabolic (ARR21)	7DAP 10. CZE disaccharide metabolic (ARR21) vs. all	ATLAS	level_3_annotation_full_timed	significant_m2am1a_LRT_genes	0.000645188	-0.0112271	-0.00121945	0.00296027	**	neg	6
7DAP 9. CZE LEA-enriched (ABR)	7DAP 9. CZE LEA-enriched (ABR) vs. all	ATLAS	level_3_annotation_full_timed	significant_m2am1a_LRT_genes	0.000945824	-0.00978588	-0.00120722	0.00388285	**	neg	6
7DAP 7. EMB hypophysis (SMB)	7DAP 7. EMB hypophysis (SMB) vs. all	ATLAS	level_3_annotation_full_timed	significant_m2am1a_LRT_genes	0.0774314	0.000876066	-0.00125025	0.121261	n.s.	pos	6
3DAP MCE	3DAP MCE vs. all	ATLAS	level_2_annotation_timed	significant_m2am1a_LRT_genes	0.0291274	0.00338251	-0.00131203	0.0482761	*	pos	6
3DAP ii1	3DAP ii1 vs. all	ATLAS	level_2_annotation_timed	significant_m2am1a_LRT_genes	2.1181917092177e-07	-0.0148492	-0.000582164	7.20185181134018e-06	****	neg	6
3DAP oi1	3DAP oi1 vs. all	ATLAS	level_2_annotation_timed	significant_m2am1a_LRT_genes	0.987415	-0.00149871	-0.00147829	0.987415	n.s.	neg	6
3DAP PEN	3DAP PEN vs. all	ATLAS	level_2_annotation_timed	significant_m2am1a_LRT_genes	9.33399520243461e-06	0.019073	-0.00161986	9.35699888389813e-05	****	pos	6
3DAP ii2	3DAP ii2 vs. all	ATLAS	level_2_annotation_timed	significant_m2am1a_LRT_genes	0.00372486	-0.00611075	-0.00115766	0.00974194	**	neg	6
3DAP EMB	3DAP EMB vs. all	ATLAS	level_2_annotation_timed	significant_m2am1a_LRT_genes	0.243994	-0.00339755	-0.00124556	0.307251	n.s.	neg	6
3DAP CZSC	3DAP CZSC vs. all	ATLAS	level_2_annotation_timed	significant_m2am1a_LRT_genes	0.974551	-0.00125035	-0.00128502	0.987415	n.s.	pos	6
3DAP oi2	3DAP oi2 vs. all	ATLAS	level_2_annotation_timed	significant_m2am1a_LRT_genes	0.484896	-0.00214662	-0.00128676	0.531821	n.s.	neg	6
3DAP CPT	3DAP CPT vs. all	ATLAS	level_2_annotation_timed	significant_m2am1a_LRT_genes	0.00190099	-0.00627127	-0.00121557	0.00538615	**	neg	6
3DAP OVL	3DAP OVL vs. all	ATLAS	level_2_annotation_timed	significant_m2am1a_LRT_genes	0.00108542	-0.00703559	-0.00123481	0.00369044	**	neg	6
3DAP FUN	3DAP FUN vs. all	ATLAS	level_2_annotation_timed	significant_m2am1a_LRT_genes	7.28166236392987e-05	-0.011156	-0.00117296	0.000353681	***	neg	6
3DAP ii1'	3DAP ii1' vs. all	ATLAS	level_2_annotation_timed	significant_m2am1a_LRT_genes	0.422693	-0.00223605	-0.00125467	0.479052	n.s.	neg	6
3DAP CZE	3DAP CZE vs. all	ATLAS	level_2_annotation_timed	significant_m2am1a_LRT_genes	2.17444918897492e-05	0.017566	-0.00137	0.000147863	***	pos	6
5DAP PEN	5DAP PEN vs. all	ATLAS	level_2_annotation_timed	significant_m2am1a_LRT_genes	0.183144	0.00110606	-0.00142672	0.249075	n.s.	pos	6
5DAP ii2	5DAP ii2 vs. all	ATLAS	level_2_annotation_timed	significant_m2am1a_LRT_genes	0.949389	-0.00115271	-0.00123451	0.987415	n.s.	pos	6
5DAP oi1	5DAP oi1 vs. all	ATLAS	level_2_annotation_timed	significant_m2am1a_LRT_genes	0.273557	-7.51314e-05	-0.00137364	0.320723	n.s.	pos	6
5DAP oi2	5DAP oi2 vs. all	ATLAS	level_2_annotation_timed	significant_m2am1a_LRT_genes	0.000233604	-0.0118581	-0.000666617	0.000882503	***	neg	6
5DAP CZSC	5DAP CZSC vs. all	ATLAS	level_2_annotation_timed	significant_m2am1a_LRT_genes	0.0143166	0.00235073	-0.001293	0.0286795	*	pos	6
5DAP MCE	5DAP MCE vs. all	ATLAS	level_2_annotation_timed	significant_m2am1a_LRT_genes	0.0777312	0.00439936	-0.00129071	0.113526	n.s.	pos	6
5DAP CZE	5DAP CZE vs. all	ATLAS	level_2_annotation_timed	significant_m2am1a_LRT_genes	5.742216222023e-07	0.0252074	-0.00159809	9.7617675774391e-06	****	pos	6
5DAP ii1	5DAP ii1 vs. all	ATLAS	level_2_annotation_timed	significant_m2am1a_LRT_genes	0.0801358	-0.00333437	-0.00121976	0.113526	n.s.	neg	6
5DAP ii1'	5DAP ii1' vs. all	ATLAS	level_2_annotation_timed	significant_m2am1a_LRT_genes	0.00684411	0.00297064	-0.00127192	0.0155133	*	pos	6
5DAP CPT	5DAP CPT vs. all	ATLAS	level_2_annotation_timed	significant_m2am1a_LRT_genes	0.00135621	-0.0104673	-0.00119103	0.00419192	**	neg	6
5DAP EMB	5DAP EMB vs. all	ATLAS	level_2_annotation_timed	significant_m2am1a_LRT_genes	0.0143398	-0.0100569	-0.00117723	0.0286795	*	neg	6
5DAP FUN	5DAP FUN vs. all	ATLAS	level_2_annotation_timed	significant_m2am1a_LRT_genes	0.000130503	-0.0127988	-0.00122658	0.000554639	***	neg	6
7DAP oi2	7DAP oi2 vs. all	ATLAS	level_2_annotation_timed	significant_m2am1a_LRT_genes	1.10082339810566e-05	0.0103535	-0.00139833	9.35699888389813e-05	****	pos	6
7DAP EMB	7DAP EMB vs. all	ATLAS	level_2_annotation_timed	significant_m2am1a_LRT_genes	0.253412	-1.57897e-05	-0.0012763	0.307715	n.s.	pos	6
7DAP MCE	7DAP MCE vs. all	ATLAS	level_2_annotation_timed	significant_m2am1a_LRT_genes	0.217603	0.000112359	-0.00125177	0.284558	n.s.	pos	6
7DAP CZE	7DAP CZE vs. all	ATLAS	level_2_annotation_timed	significant_m2am1a_LRT_genes	0.00574726	-0.00641018	-0.000902831	0.0139576	*	neg	6
7DAP oi1	7DAP oi1 vs. all	ATLAS	level_2_annotation_timed	significant_m2am1a_LRT_genes	6.50568877445722e-05	0.00622449	-0.00158248	0.000353681	***	pos	6
7DAP PEN	7DAP PEN vs. all	ATLAS	level_2_annotation_timed	significant_m2am1a_LRT_genes	0.0298176	-0.00438436	-0.00108816	0.0482761	*	neg	6
7DAP ii1'	7DAP ii1' vs. all	ATLAS	level_2_annotation_timed	significant_m2am1a_LRT_genes	0.0339176	0.00170148	-0.00125817	0.0524182	n.s. 0.1	pos	6
7DAP CZSC	7DAP CZSC vs. all	ATLAS	level_2_annotation_timed	significant_m2am1a_LRT_genes	0.0265072	0.00188633	-0.00126965	0.0474339	*	pos	6
7DAP ii1	7DAP ii1 vs. all	ATLAS	level_2_annotation_timed	significant_m2am1a_LRT_genes	0.0171991	-0.00514488	-0.00120373	0.0324873	*	neg	6
3DAP 13. CPT persistent nucellus (AGO3)	3DAP 13. CPT persistent nucellus (AGO3) vs. all	3DAP	level_3_annotation_full_timed	Nucleoside_met_GO0009116_modsc	5.955756653107e-4	0.105658	-0.0066291	0.0166761	*	pos	ExtD3
3DAP 20. ii2 general (DELTAVPE and STK)	3DAP 20. ii2 general (DELTAVPE and STK) vs. all	3DAP	level_3_annotation_full_timed	Nucleoside_met_GO0009116_modsc	0.00173195	0.0412861	-0.00867112	0.0220641	*	pos	ExtD3
3DAP 11. OVL scenescing (BFN1)	3DAP 11. OVL scenescing (BFN1) vs. all	3DAP	level_3_annotation_full_timed	Nucleoside_met_GO0009116_modsc	0.00236402	0.0507563	-0.00532923	0.0220641	*	pos	ExtD3
3DAP 4. CZE nodule (CYCD4;2)	3DAP 4. CZE nodule (CYCD4;2) vs. all	3DAP	level_3_annotation_full_timed	Nucleoside_met_GO0009116_modsc	0.00448224	-0.0845021	-0.00432299	0.0278202	*	neg	ExtD3
3DAP 6. PEN general (AGL62)	3DAP 6. PEN general (AGL62) vs. all	3DAP	level_3_annotation_full_timed	Nucleoside_met_GO0009116_modsc	0.00496788	-0.0646514	-0.0023043	0.0278202	*	neg	ExtD3
3DAP 7. PEN G2/M-phase (AGL62 and TOPII)	3DAP 7. PEN G2/M-phase (AGL62 and TOPII) vs. all	3DAP	level_3_annotation_full_timed	Nucleoside_met_GO0009116_modsc	0.00675507	-0.0799349	-0.00424053	0.0315237	*	neg	ExtD3
3DAP 19. ii1' (DELTAVPE and UMAMIT29)	3DAP 19. ii1' (DELTAVPE and UMAMIT29) vs. all	3DAP	level_3_annotation_full_timed	Nucleoside_met_GO0009116_modsc	0.00900528	0.0212846	-0.00594968	0.032644	*	pos	ExtD3
3DAP 15. CZSC placentochalazal phosphate transport (ARR22, SWEET10, and UMAMIT14)	3DAP 15. CZSC placentochalazal phosphate transport (ARR22, SWEET10, and UMAMIT14) vs. all	3DAP	level_3_annotation_full_timed	Nucleoside_met_GO0009116_modsc	0.00932686	0.0243388	-0.00548192	0.032644	*	pos	ExtD3
3DAP 2. CZE nodule-like (MEA)	3DAP 2. CZE nodule-like (MEA) vs. all	3DAP	level_3_annotation_full_timed	Nucleoside_met_GO0009116_modsc	0.016272	-0.0651454	-0.00434029	0.0439788	*	neg	ExtD3
3DAP 16. CZSC placentochalazal callose-synthesizing (ARR22, TET5, and CALS8)	3DAP 16. CZSC placentochalazal callose-synthesizing (ARR22, TET5, and CALS8) vs. all	3DAP	level_3_annotation_full_timed	Nucleoside_met_GO0009116_modsc	0.0168607	-0.0229198	-0.00457691	0.0439788	*	neg	ExtD3
3DAP 1. EMB (PDF1)	3DAP 1. EMB (PDF1) vs. all	3DAP	level_3_annotation_full_timed	Nucleoside_met_GO0009116_modsc	0.017965	-0.0264992	-0.00455083	0.0439788	*	neg	ExtD3
3DAP 3. CZE basal cyst (RALFL3)	3DAP 3. CZE basal cyst (RALFL3) vs. all	3DAP	level_3_annotation_full_timed	Nucleoside_met_GO0009116_modsc	0.0188481	0.0146616	-0.00490419	0.0439788	*	pos	ExtD3
3DAP 25. oi2 general (GLABRA2)	3DAP 25. oi2 general (GLABRA2) vs. all	3DAP	level_3_annotation_full_timed	Nucleoside_met_GO0009116_modsc	0.0208903	-0.0212832	-0.00349991	0.0449945	*	neg	ExtD3
3DAP 12. CPT transient nucellus (PLL24)	3DAP 12. CPT transient nucellus (PLL24) vs. all	3DAP	level_3_annotation_full_timed	Nucleoside_met_GO0009116_modsc	0.0231595	0.0406538	-0.00531413	0.0463191	*	pos	ExtD3
3DAP 24. oi1 micropylar (SWEET12)	3DAP 24. oi1 micropylar (SWEET12) vs. all	3DAP	level_3_annotation_full_timed	Nucleoside_met_GO0009116_modsc	0.0263052	0.0391628	-0.00604667	0.0479486	*	pos	ExtD3
3DAP 28. oi2 S-phase (GLABRA2 and BARD1)	3DAP 28. oi2 S-phase (GLABRA2 and BARD1) vs. all	3DAP	level_3_annotation_full_timed	Nucleoside_met_GO0009116_modsc	0.0288262	-0.018181	-0.00462948	0.0479486	*	neg	ExtD3
3DAP 9. FUN epidermal (CER3)	3DAP 9. FUN epidermal (CER3) vs. all	3DAP	level_3_annotation_full_timed	Nucleoside_met_GO0009116_modsc	0.0291116	0.0329785	-0.00517582	0.0479486	*	pos	ExtD3
3DAP 5. MCE (ARF13)	3DAP 5. MCE (ARF13) vs. all	3DAP	level_3_annotation_full_timed	Nucleoside_met_GO0009116_modsc	0.0356414	-0.0360176	-0.00381195	0.0533571	n.s. 0.1	neg	ExtD3
3DAP 21. oi1 flavinol synthesizing (MYB11)	3DAP 21. oi1 flavinol synthesizing (MYB11) vs. all	3DAP	level_3_annotation_full_timed	Nucleoside_met_GO0009116_modsc	0.0362066	-0.0170503	-0.001319	0.0533571	n.s. 0.1	neg	ExtD3
3DAP 17. ii1 endothelium (BAN and TT1)	3DAP 17. ii1 endothelium (BAN and TT1) vs. all	3DAP	level_3_annotation_full_timed	Nucleoside_met_GO0009116_modsc	0.0445057	0.0110713	-0.00674512	0.062308	n.s. 0.1	pos	ExtD3
3DAP 8. FUN hilum (ADPG1)	3DAP 8. FUN hilum (ADPG1) vs. all	3DAP	level_3_annotation_full_timed	Nucleoside_met_GO0009116_modsc	0.0563239	0.0292834	-0.00535856	0.0750985	n.s. 0.1	pos	ExtD3
3DAP 22. oi1 flavinol synthesizing high PCD (MYB11, SCOOP15, BAP1)	3DAP 22. oi1 flavinol synthesizing high PCD (MYB11, SCOOP15, BAP1) vs. all	3DAP	level_3_annotation_full_timed	Nucleoside_met_GO0009116_modsc	0.0646047	-0.0180429	-0.00382847	0.0822242	n.s. 0.1	neg	ExtD3
3DAP 23. oi1 flavinol synthesizing S-phase (MYB11 and BARD1)	3DAP 23. oi1 flavinol synthesizing S-phase (MYB11 and BARD1) vs. all	3DAP	level_3_annotation_full_timed	Nucleoside_met_GO0009116_modsc	0.0735498	-0.0149287	-0.00454103	0.0895389	n.s. 0.1	neg	ExtD3
3DAP 10. FUN companion cells (SUC2)	3DAP 10. FUN companion cells (SUC2) vs. all	3DAP	level_3_annotation_full_timed	Nucleoside_met_GO0009116_modsc	0.153651	0.0175415	-0.0048881	0.17925956060220485	n.s.	pos	ExtD3
3DAP 18. ii1 basal (contains pigment strand) (BAN and SWEET4)	3DAP 18. ii1 basal (contains pigment strand) (BAN and SWEET4) vs. all	3DAP	level_3_annotation_full_timed	Nucleoside_met_GO0009116_modsc	0.242008	-0.00977597	-0.00467487	0.27104924646452916	n.s.	neg	ExtD3
3DAP 27. oi2 general (GLABRA2 and WRKY40)	3DAP 27. oi2 general (GLABRA2 and WRKY40) vs. all	3DAP	level_3_annotation_full_timed	Nucleoside_met_GO0009116_modsc	0.260582	-0.0178174	-0.00452672	0.28062692962018615	n.s.	neg	ExtD3
3DAP 14. CZSC fluid transport (ARR22 and AAP6)	3DAP 14. CZSC fluid transport (ARR22 and AAP6) vs. all	3DAP	level_3_annotation_full_timed	Nucleoside_met_GO0009116_modsc	0.431078	-0.014717	-0.004498	0.4470436417619822	n.s.	neg	ExtD3
3DAP 26. oi2 very long chain fatty acid-synthesizing (KCS6 and WRI4)	3DAP 26. oi2 very long chain fatty acid-synthesizing (KCS6 and WRI4) vs. all	3DAP	level_3_annotation_full_timed	Nucleoside_met_GO0009116_modsc	0.513206	-0.00215619	-0.0049466	0.513206	n.s.	pos	ExtD3
3DAP 20. ii2 general (DELTAVPE and STK)	3DAP 20. ii2 general (DELTAVPE and STK) vs. all	3DAP	level_3_annotation_full_timed	PCD_GO0012501_modsc	0.00232667	0.0522023	0.0125567	0.0530125	n.s. 0.1	pos	ExtD3
3DAP 19. ii1' (DELTAVPE and UMAMIT29)	3DAP 19. ii1' (DELTAVPE and UMAMIT29) vs. all	3DAP	level_3_annotation_full_timed	PCD_GO0012501_modsc	0.00727577	0.0462955	0.0142885	0.0530125	n.s. 0.1	pos	ExtD3
3DAP 2. CZE nodule-like (MEA)	3DAP 2. CZE nodule-like (MEA) vs. all	3DAP	level_3_annotation_full_timed	PCD_GO0012501_modsc	0.00748706	2.5923205026835e-4	0.015719	0.0530125	n.s. 0.1	neg	ExtD3
3DAP 25. oi2 general (GLABRA2)	3DAP 25. oi2 general (GLABRA2) vs. all	3DAP	level_3_annotation_full_timed	PCD_GO0012501_modsc	0.00890691	0.00334948	0.016589	0.0530125	n.s. 0.1	neg	ExtD3
3DAP 8. FUN hilum (ADPG1)	3DAP 8. FUN hilum (ADPG1) vs. all	3DAP	level_3_annotation_full_timed	PCD_GO0012501_modsc	0.00946651	0.0269808	0.0154169	0.0530125	n.s. 0.1	pos	ExtD3
3DAP 21. oi1 flavinol synthesizing (MYB11)	3DAP 21. oi1 flavinol synthesizing (MYB11) vs. all	3DAP	level_3_annotation_full_timed	PCD_GO0012501_modsc	0.0113942	0.00116807	0.0197197	0.0531731	n.s. 0.1	neg	ExtD3
3DAP 12. CPT transient nucellus (PLL24)	3DAP 12. CPT transient nucellus (PLL24) vs. all	3DAP	level_3_annotation_full_timed	PCD_GO0012501_modsc	0.0144107	0.0456523	0.0152731	0.0576429	n.s. 0.1	pos	ExtD3
3DAP 3. CZE basal cyst (RALFL3)	3DAP 3. CZE basal cyst (RALFL3) vs. all	3DAP	level_3_annotation_full_timed	PCD_GO0012501_modsc	0.0171349	5.5753614487771e-5	0.0156338	0.0599721	n.s. 0.1	neg	ExtD3
3DAP 11. OVL scenescing (BFN1)	3DAP 11. OVL scenescing (BFN1) vs. all	3DAP	level_3_annotation_full_timed	PCD_GO0012501_modsc	0.0221052	0.0448014	0.0153572	0.0687718	n.s. 0.1	pos	ExtD3
3DAP 6. PEN general (AGL62)	3DAP 6. PEN general (AGL62) vs. all	3DAP	level_3_annotation_full_timed	PCD_GO0012501_modsc	0.0369908	0.00922289	0.0158602	0.10357431098824628	n.s.	neg	ExtD3
3DAP 10. FUN companion cells (SUC2)	3DAP 10. FUN companion cells (SUC2) vs. all	3DAP	level_3_annotation_full_timed	PCD_GO0012501_modsc	0.0489986	0.0339794	0.0155539	0.11836965263360956	n.s.	pos	ExtD3
3DAP 7. PEN G2/M-phase (AGL62 and TOPII)	3DAP 7. PEN G2/M-phase (AGL62 and TOPII) vs. all	3DAP	level_3_annotation_full_timed	PCD_GO0012501_modsc	0.0507299	0.00323742	0.01569	0.11836965263360956	n.s.	neg	ExtD3
3DAP 24. oi1 micropylar (SWEET12)	3DAP 24. oi1 micropylar (SWEET12) vs. all	3DAP	level_3_annotation_full_timed	PCD_GO0012501_modsc	0.100199	0.0253699	0.0153208	0.2158140782376665	n.s.	pos	ExtD3
3DAP 18. ii1 basal (contains pigment strand) (BAN and SWEET4)	3DAP 18. ii1 basal (contains pigment strand) (BAN and SWEET4) vs. all	3DAP	level_3_annotation_full_timed	PCD_GO0012501_modsc	0.134212	0.0128434	0.0156848	0.268423	n.s.	neg	ExtD3
3DAP 4. CZE nodule (CYCD4;2)	3DAP 4. CZE nodule (CYCD4;2) vs. all	3DAP	level_3_annotation_full_timed	PCD_GO0012501_modsc	0.19937	0.00134761	0.0156753	0.37215703844944054	n.s.	neg	ExtD3
3DAP 16. CZSC placentochalazal callose-synthesizing (ARR22, TET5, and CALS8)	3DAP 16. CZSC placentochalazal callose-synthesizing (ARR22, TET5, and CALS8) vs. all	3DAP	level_3_annotation_full_timed	PCD_GO0012501_modsc	0.217487	0.0212924	0.0155056	0.380603	n.s.	pos	ExtD3
3DAP 9. FUN epidermal (CER3)	3DAP 9. FUN epidermal (CER3) vs. all	3DAP	level_3_annotation_full_timed	PCD_GO0012501_modsc	0.286484	0.0282984	0.0154603	0.4543449846955476	n.s.	pos	ExtD3
3DAP 13. CPT persistent nucellus (AGO3)	3DAP 13. CPT persistent nucellus (AGO3) vs. all	3DAP	level_3_annotation_full_timed	PCD_GO0012501_modsc	0.292079	0.0221415	0.0154772	0.4543449846955476	n.s.	pos	ExtD3
3DAP 22. oi1 flavinol synthesizing high PCD (MYB11, SCOOP15, BAP1)	3DAP 22. oi1 flavinol synthesizing high PCD (MYB11, SCOOP15, BAP1) vs. all	3DAP	level_3_annotation_full_timed	PCD_GO0012501_modsc	0.364302	0.0105855	0.0160259	0.536866	n.s.	neg	ExtD3
3DAP 1. EMB (PDF1)	3DAP 1. EMB (PDF1) vs. all	3DAP	level_3_annotation_full_timed	PCD_GO0012501_modsc	0.410659	0.00893418	0.0156876	0.5749229480217356	n.s.	neg	ExtD3
3DAP 28. oi2 S-phase (GLABRA2 and BARD1)	3DAP 28. oi2 S-phase (GLABRA2 and BARD1) vs. all	3DAP	level_3_annotation_full_timed	PCD_GO0012501_modsc	0.457261	0.00822295	0.0157278	0.5756331878026765	n.s.	neg	ExtD3
3DAP 14. CZSC fluid transport (ARR22 and AAP6)	3DAP 14. CZSC fluid transport (ARR22 and AAP6) vs. all	3DAP	level_3_annotation_full_timed	PCD_GO0012501_modsc	0.470012	0.0190098	0.0154754	0.5756331878026765	n.s.	pos	ExtD3
3DAP 17. ii1 endothelium (BAN and TT1)	3DAP 17. ii1 endothelium (BAN and TT1) vs. all	3DAP	level_3_annotation_full_timed	PCD_GO0012501_modsc	0.472842	0.016758	0.0154422	0.5756331878026765	n.s.	pos	ExtD3
3DAP 26. oi2 very long chain fatty acid-synthesizing (KCS6 and WRI4)	3DAP 26. oi2 very long chain fatty acid-synthesizing (KCS6 and WRI4) vs. all	3DAP	level_3_annotation_full_timed	PCD_GO0012501_modsc	0.565505	0.0170035	0.0155372	0.6597552891111922	n.s.	pos	ExtD3
3DAP 23. oi1 flavinol synthesizing S-phase (MYB11 and BARD1)	3DAP 23. oi1 flavinol synthesizing S-phase (MYB11 and BARD1) vs. all	3DAP	level_3_annotation_full_timed	PCD_GO0012501_modsc	0.594436	0.0114591	0.0157318	0.6657686484538836	n.s.	neg	ExtD3
3DAP 5. MCE (ARF13)	3DAP 5. MCE (ARF13) vs. all	3DAP	level_3_annotation_full_timed	PCD_GO0012501_modsc	0.675521	0.0148489	0.0156232	0.7274840743665331	n.s.	neg	ExtD3
3DAP 27. oi2 general (GLABRA2 and WRKY40)	3DAP 27. oi2 general (GLABRA2 and WRKY40) vs. all	3DAP	level_3_annotation_full_timed	PCD_GO0012501_modsc	0.877178	0.015903	0.0155827	0.9096655678570248	n.s.	pos	ExtD3
3DAP 15. CZSC placentochalazal phosphate transport (ARR22, SWEET10, and UMAMIT14)	3DAP 15. CZSC placentochalazal phosphate transport (ARR22, SWEET10, and UMAMIT14) vs. all	3DAP	level_3_annotation_full_timed	PCD_GO0012501_modsc	0.948947	0.0152028	0.0155957	0.948947	n.s.	neg	ExtD3
5DAP 16. CZSC placentochalazal callose-synthesizing (ARR22, TET5, and CALS8)	5DAP 16. CZSC placentochalazal callose-synthesizing (ARR22, TET5, and CALS8) vs. all	ATLAS	level_3_annotation_full_timed	Callose_synth_0003843_modsc	2.93533933275246e-7	0.805085	-0.0134016	2.2895646795469187e-5	****	pos	ExtD3
3DAP 16. CZSC placentochalazal callose-synthesizing (ARR22, TET5, and CALS8)	3DAP 16. CZSC placentochalazal callose-synthesizing (ARR22, TET5, and CALS8) vs. all	ATLAS	level_3_annotation_full_timed	Callose_synth_0003843_modsc	3.31129188166619e-6	0.650092	-0.0149906	1.2914038338498142e-4	***	pos	ExtD3
5DAP 3. CZE apical cyst (MEE56)	5DAP 3. CZE apical cyst (MEE56) vs. all	ATLAS	level_3_annotation_full_timed	Callose_synth_0003843_modsc	2.9159247299506e-4	0.230485	-0.0122117	0.0075814	**	pos	ExtD3
3DAP 15. CZSC placentochalazal phosphate transport (ARR22, SWEET10, and UMAMIT14)	3DAP 15. CZSC placentochalazal phosphate transport (ARR22, SWEET10, and UMAMIT14) vs. all	ATLAS	level_3_annotation_full_timed	Callose_synth_0003843_modsc	0.00331498	0.140803	-0.0128612	0.055704	n.s. 0.1	pos	ExtD4
5DAP 11. PEN S-phase (HMGB6)	5DAP 11. PEN S-phase (HMGB6) vs. all	ATLAS	level_3_annotation_full_timed	Callose_synth_0003843_modsc	0.00357077	0.156323	-0.0131999	0.055704	n.s. 0.1	pos	ExtD4
3DAP 25. oi2 general (GLABRA2)	3DAP 25. oi2 general (GLABRA2) vs. all	ATLAS	level_3_annotation_full_timed	Callose_synth_0003843_modsc	0.00538963	-0.133911	-0.00922433	0.0655623	n.s. 0.1	neg	ExtD4
5DAP 8. PEN G2M-phase (MAD2)	5DAP 8. PEN G2M-phase (MAD2) vs. all	ATLAS	level_3_annotation_full_timed	Callose_synth_0003843_modsc	0.00729161	0.135284	-0.0135939	0.0655623	n.s. 0.1	pos	ExtD4
7DAP 15. CZSC general (ARR22, SWEET10, and TET5)	7DAP 15. CZSC general (ARR22, SWEET10, and TET5) vs. all	ATLAS	level_3_annotation_full_timed	Callose_synth_0003843_modsc	0.00792899	0.109997	-0.0128133	0.0655623	n.s. 0.1	pos	ExtD4
3DAP 17. ii1 endothelium (BAN and TT1)	3DAP 17. ii1 endothelium (BAN and TT1) vs. all	ATLAS	level_3_annotation_full_timed	Callose_synth_0003843_modsc	0.00820467	-0.120465	-0.00870225	0.0655623	n.s. 0.1	neg	ExtD4
3DAP 27. oi2 general (GLABRA2 and WRKY40)	3DAP 27. oi2 general (GLABRA2 and WRKY40) vs. all	ATLAS	level_3_annotation_full_timed	Callose_synth_0003843_modsc	0.00840542	-0.129638	-0.0108665	0.0655623	n.s. 0.1	neg	ExtD4
3DAP 10. FUN companion cells (SUC2)	3DAP 10. FUN companion cells (SUC2) vs. all	ATLAS	level_3_annotation_full_timed	Callose_synth_0003843_modsc	0.0107948	0.110492	-0.0115588	0.0765446	n.s. 0.1	pos	ExtD4
3DAP 5. MCE (ARF13)	3DAP 5. MCE (ARF13) vs. all	ATLAS	level_3_annotation_full_timed	Callose_synth_0003843_modsc	0.0193239	-0.110363	-0.0107915	0.12560559681248865	n.s.	neg	ExtD4
5DAP 29. oi2 S-phase (GLABRA2, TSO2)	5DAP 29. oi2 S-phase (GLABRA2, TSO2) vs. all	ATLAS	level_3_annotation_full_timed	Callose_synth_0003843_modsc	0.0249673	0.106679	-0.0115517	0.1498038046420554	n.s.	pos	ExtD4
5DAP 25. oi1 S-phase (MYB11 and TSO2)	5DAP 25. oi1 S-phase (MYB11 and TSO2) vs. all	ATLAS	level_3_annotation_full_timed	Callose_synth_0003843_modsc	0.0271245	0.103522	-0.0116674	0.1511224430740696	n.s.	pos	ExtD4
5DAP 15. CZSC placentochalazal phosphate transport (ARR22, SWEET10, and UMAMIT14)	5DAP 15. CZSC placentochalazal phosphate transport (ARR22, SWEET10, and UMAMIT14) vs. all	ATLAS	level_3_annotation_full_timed	Callose_synth_0003843_modsc	0.0406068	0.0741818	-0.0121733	0.2033113278822067	n.s.	pos	ExtD4
3DAP 6. PEN general (AGL62)	3DAP 6. PEN general (AGL62) vs. all	ATLAS	level_3_annotation_full_timed	Callose_synth_0003843_modsc	0.0424864	-0.0925944	-0.0108751	0.2033113278822067	n.s.	neg	ExtD4
7DAP 3. EMB dividing (MAD2, HMGB6)	7DAP 3. EMB dividing (MAD2, HMGB6) vs. all	ATLAS	level_3_annotation_full_timed	Callose_synth_0003843_modsc	0.0443114	0.0756019	-0.0127265	0.2033113278822067	n.s.	pos	ExtD4
5DAP 27. oi2 general (GLABRA2)	5DAP 27. oi2 general (GLABRA2) vs. all	ATLAS	level_3_annotation_full_timed	Callose_synth_0003843_modsc	0.0493212	-0.0909781	-0.00922656	0.21372527285397988	n.s.	neg	ExtD4
3DAP 19. ii1' (DELTAVPE and UMAMIT29)	3DAP 19. ii1' (DELTAVPE and UMAMIT29) vs. all	ATLAS	level_3_annotation_full_timed	Callose_synth_0003843_modsc	0.0539972	-0.0857441	-0.0109757	0.21758598358943587	n.s.	neg	ExtD4
7DAP 20. oi1 polyester monomer biosynthesis (MYB11 and CYP86B1)	7DAP 20. oi1 polyester monomer biosynthesis (MYB11 and CYP86B1) vs. all	ATLAS	level_3_annotation_full_timed	Callose_synth_0003843_modsc	0.0557913	0.0642233	-0.0123904	0.21758598358943587	n.s.	pos	ExtD4
5DAP 26. oi2 LTP-enriched (LTP1)	5DAP 26. oi2 LTP-enriched (LTP1) vs. all	ATLAS	level_3_annotation_full_timed	Callose_synth_0003843_modsc	0.0591155	-0.0902509	-0.00899238	0.21957194722412637	n.s.	neg	ExtD4
3DAP 21. oi1 flavinol synthesizing (MYB11)	3DAP 21. oi1 flavinol synthesizing (MYB11) vs. all	ATLAS	level_3_annotation_full_timed	Callose_synth_0003843_modsc	0.0669117	-0.0750861	-0.00924852	0.2372324849029349	n.s.	neg	ExtD4
3DAP 22. oi1 flavinol synthesizing high PCD (MYB11, SCOOP15, BAP1)	3DAP 22. oi1 flavinol synthesizing high PCD (MYB11, SCOOP15, BAP1) vs. all	ATLAS	level_3_annotation_full_timed	Callose_synth_0003843_modsc	0.0728812	-0.0770307	-0.0107319	0.2471624170845892	n.s.	neg	ExtD4
3DAP 2. CZE nodule-like (MEA)	3DAP 2. CZE nodule-like (MEA) vs. all	ATLAS	level_3_annotation_full_timed	Callose_synth_0003843_modsc	0.0783057	-0.0769465	-0.0113896	0.2526703543929983	n.s.	neg	ExtD4
3DAP 3. CZE basal cyst (RALFL3)	3DAP 3. CZE basal cyst (RALFL3) vs. all	ATLAS	level_3_annotation_full_timed	Callose_synth_0003843_modsc	0.0809841	-0.0877948	-0.0114236	0.2526703543929983	n.s.	neg	ExtD4
3DAP 7. PEN G2/M-phase (AGL62 and TOPII)	3DAP 7. PEN G2/M-phase (AGL62 and TOPII) vs. all	ATLAS	level_3_annotation_full_timed	Callose_synth_0003843_modsc	0.0853194	-0.0758338	-0.0113904	0.2529490813723981	n.s.	neg	ExtD4
5DAP 20. ii2 general (DELTAVPE and STK)	5DAP 20. ii2 general (DELTAVPE and STK) vs. all	ATLAS	level_3_annotation_full_timed	Callose_synth_0003843_modsc	0.0875593	0.0563661	-0.0120261	0.2529490813723981	n.s.	pos	ExtD4
3DAP 26. oi2 very long chain fatty acid-synthesizing (KCS6 and WRI4)	3DAP 26. oi2 very long chain fatty acid-synthesizing (KCS6 and WRI4) vs. all	ATLAS	level_3_annotation_full_timed	Callose_synth_0003843_modsc	0.0963609	-0.0731793	-0.0111835	0.26843381637253794	n.s.	neg	ExtD4
5DAP 18. ii1 endothelium (BAN and TT1)	5DAP 18. ii1 endothelium (BAN and TT1) vs. all	ATLAS	level_3_annotation_full_timed	Callose_synth_0003843_modsc	0.127767	-0.0681566	-0.0110521	0.3413593431031888	n.s.	neg	ExtD4
3DAP 4. CZE nodule (CYCD4;2)	3DAP 4. CZE nodule (CYCD4;2) vs. all	ATLAS	level_3_annotation_full_timed	Callose_synth_0003843_modsc	0.131292	-0.0695909	-0.0114199	0.3413593431031888	n.s.	neg	ExtD4
7DAP 21. oi2 general (GLABRA2)	7DAP 21. oi2 general (GLABRA2) vs. all	ATLAS	level_3_annotation_full_timed	Callose_synth_0003843_modsc	0.158397	-0.0607771	-0.0106254	0.3768246056093999	n.s.	neg	ExtD4
7DAP 4. EMB vascular primordium (SHR)	7DAP 4. EMB vascular primordium (SHR) vs. all	ATLAS	level_3_annotation_full_timed	Callose_synth_0003843_modsc	0.158456	0.0383601	-0.0120821	0.3768246056093999	n.s.	pos	ExtD4
5DAP 4. CZE basal cyst (RALFL3)	5DAP 4. CZE basal cyst (RALFL3) vs. all	ATLAS	level_3_annotation_full_timed	Callose_synth_0003843_modsc	0.164198	-0.0705481	-0.0113274	0.3768246056093999	n.s.	neg	ExtD4
5DAP 5. CZE nodule (CYCD4;2)	5DAP 5. CZE nodule (CYCD4;2) vs. all	ATLAS	level_3_annotation_full_timed	Callose_synth_0003843_modsc	0.164257	0.0690466	-0.0115226	0.3768246056093999	n.s.	pos	ExtD4
7DAP 12. MCE_ESR sheath promoting (ZOU, RGP3 and KRS)	7DAP 12. MCE_ESR sheath promoting (ZOU, RGP3 and KRS) vs. all	ATLAS	level_3_annotation_full_timed	Callose_synth_0003843_modsc	0.176204	-0.0582542	-0.0104921	0.39268310701355247	n.s.	neg	ExtD4
3DAP 23. oi1 flavinol synthesizing S-phase (MYB11 and BARD1)	3DAP 23. oi1 flavinol synthesizing S-phase (MYB11 and BARD1) vs. all	ATLAS	level_3_annotation_full_timed	Callose_synth_0003843_modsc	0.203512	0.0342488	-0.0123224	0.4409423549654911	n.s.	pos	ExtD4
7DAP 18. ii1'/ii2 (DELTAVPE)	7DAP 18. ii1'/ii2 (DELTAVPE) vs. all	ATLAS	level_3_annotation_full_timed	Callose_synth_0003843_modsc	0.213389	0.0315073	-0.0116866	0.44255392934609417	n.s.	pos	ExtD4
7DAP 13. PEN (ABS6)	7DAP 13. PEN (ABS6) vs. all	ATLAS	level_3_annotation_full_timed	Callose_synth_0003843_modsc	0.223577	0.0298291	-0.0125536	0.44255392934609417	n.s.	pos	ExtD4
5DAP 14. CPT apical persistent nucellus (AGO3)	5DAP 14. CPT apical persistent nucellus (AGO3) vs. all	ATLAS	level_3_annotation_full_timed	Callose_synth_0003843_modsc	0.224566	0.0317295	-0.0115338	0.44255392934609417	n.s.	pos	ExtD4
3DAP 24. oi1 micropylar (SWEET12)	3DAP 24. oi1 micropylar (SWEET12) vs. all	ATLAS	level_3_annotation_full_timed	Callose_synth_0003843_modsc	0.226951	-0.0541573	-0.0114334	0.44255392934609417	n.s.	neg	ExtD4
7DAP 2. EMB protoderm (PDF1)	7DAP 2. EMB protoderm (PDF1) vs. all	ATLAS	level_3_annotation_full_timed	Callose_synth_0003843_modsc	0.260377	-0.0486161	-0.00976392	0.4953512668474576	n.s.	neg	ExtD4
7DAP 19. oi1 flavinol synthesizing (MYB11)	7DAP 19. oi1 flavinol synthesizing (MYB11) vs. all	ATLAS	level_3_annotation_full_timed	Callose_synth_0003843_modsc	0.27677	0.0245991	-0.0123884	0.512495	n.s.	pos	ExtD4
5DAP 12. PEN general IV (TGA9)	5DAP 12. PEN general IV (TGA9) vs. all	ATLAS	level_3_annotation_full_timed	Callose_synth_0003843_modsc	0.285399	0.0260861	-0.0113357	0.512495	n.s.	pos	ExtD4
7DAP 1. EMB inner cotyledon (XYL4)	7DAP 1. EMB inner cotyledon (XYL4) vs. all	ATLAS	level_3_annotation_full_timed	Callose_synth_0003843_modsc	0.2891	-0.0460208	-0.00963346	0.512495	n.s.	neg	ExtD4
7DAP 17. ii1 endothelium (BAN and TT1)	7DAP 17. ii1 endothelium (BAN and TT1) vs. all	ATLAS	level_3_annotation_full_timed	Callose_synth_0003843_modsc	0.303825	-0.0461599	-0.0112967	0.5139852300410249	n.s.	neg	ExtD4
7DAP 14. PEN dehydrin enriched (ERD10)	7DAP 14. PEN dehydrin enriched (ERD10) vs. all	ATLAS	level_3_annotation_full_timed	Callose_synth_0003843_modsc	0.307195	0.0259688	-0.0115767	0.5139852300410249	n.s.	pos	ExtD4
3DAP 14. CZSC fluid transport (ARR22 and AAP6)	3DAP 14. CZSC fluid transport (ARR22 and AAP6) vs. all	ATLAS	level_3_annotation_full_timed	Callose_synth_0003843_modsc	0.309709	0.0235548	-0.0123114	0.5139852300410249	n.s.	pos	ExtD4
5DAP 22. oi1 basal (MYB11 and PIN3)	5DAP 22. oi1 basal (MYB11 and PIN3) vs. all	ATLAS	level_3_annotation_full_timed	Callose_synth_0003843_modsc	0.356981	0.0257608	-0.0114979	0.5763034071758324	n.s.	pos	ExtD4
3DAP 8. FUN hilum (ADPG1)	3DAP 8. FUN hilum (ADPG1) vs. all	ATLAS	level_3_annotation_full_timed	Callose_synth_0003843_modsc	0.362037	0.0198443	-0.0118145	0.5763034071758324	n.s.	pos	ExtD4
7DAP 5. EMB ground tissue initials (JKD, SCR)	7DAP 5. EMB ground tissue initials (JKD, SCR) vs. all	ATLAS	level_3_annotation_full_timed	Callose_synth_0003843_modsc	0.381724	0.0188009	-0.0116978	0.5954887116219211	n.s.	pos	ExtD4
7DAP 6. EMB cortical initials (JKD)	7DAP 6. EMB cortical initials (JKD) vs. all	ATLAS	level_3_annotation_full_timed	Callose_synth_0003843_modsc	0.396639	-0.0407417	-0.0112175	0.6066245154555162	n.s.	neg	ExtD4
7DAP 8. CZE photosynthetic (GA3OX4)	7DAP 8. CZE photosynthetic (GA3OX4) vs. all	ATLAS	level_3_annotation_full_timed	Callose_synth_0003843_modsc	0.411702	-0.0375627	-0.00996138	0.6175525567966036	n.s.	neg	ExtD4
5DAP 24. oi1 micropylar (SWEET12)	5DAP 24. oi1 micropylar (SWEET12) vs. all	ATLAS	level_3_annotation_full_timed	Callose_synth_0003843_modsc	0.435477	0.0147113	-0.011436	0.6408909163745709	n.s.	pos	ExtD4
3DAP 12. CPT transient nucellus (PLL24)	3DAP 12. CPT transient nucellus (PLL24) vs. all	ATLAS	level_3_annotation_full_timed	Callose_synth_0003843_modsc	0.454887	-0.0364173	-0.0115048	0.6570590842351525	n.s.	neg	ExtD4
3DAP 9. FUN epidermal (CER3)	3DAP 9. FUN epidermal (CER3) vs. all	ATLAS	level_3_annotation_full_timed	Callose_synth_0003843_modsc	0.470128	-0.0359254	-0.0115033	0.6604264685681018	n.s.	neg	ExtD4
3DAP 13. CPT persistent nucellus (AGO3)	3DAP 13. CPT persistent nucellus (AGO3) vs. all	ATLAS	level_3_annotation_full_timed	Callose_synth_0003843_modsc	0.474152	0.0144244	-0.011803	0.6604264685681018	n.s.	pos	ExtD4
5DAP 28. oi2 very long chain fatty acid-synthesizing (KCS6 and WRI4)	5DAP 28. oi2 very long chain fatty acid-synthesizing (KCS6 and WRI4) vs. all	ATLAS	level_3_annotation_full_timed	Callose_synth_0003843_modsc	0.490832	-0.0354685	-0.0112371	0.6714420838642895	n.s.	neg	ExtD4
5DAP 13. FUN epidermal (CER3)	5DAP 13. FUN epidermal (CER3) vs. all	ATLAS	level_3_annotation_full_timed	Callose_synth_0003843_modsc	0.49985	0.0132953	-0.0114371	0.6714420838642895	n.s.	pos	ExtD4
5DAP 10. PEN general V (PTR3)	5DAP 10. PEN general V (PTR3) vs. all	ATLAS	level_3_annotation_full_timed	Callose_synth_0003843_modsc	0.520412	0.0188717	-0.0114634	0.6714420838642895	n.s.	pos	ExtD4
7DAP 16. ii1 basal (contains pigment strand) (BAN and SWEET4)	7DAP 16. ii1 basal (contains pigment strand) (BAN and SWEET4) vs. all	ATLAS	level_3_annotation_full_timed	Callose_synth_0003843_modsc	0.522374	0.0101359	-0.0115146	0.6714420838642895	n.s.	pos	ExtD4
7DAP 9. CZE LEA-enriched (ABR)	7DAP 9. CZE LEA-enriched (ABR) vs. all	ATLAS	level_3_annotation_full_timed	Callose_synth_0003843_modsc	0.525102	-0.0331331	-0.0112333	0.6714420838642895	n.s.	neg	ExtD4
5DAP 7. PEN general I (IMK2)	5DAP 7. PEN general I (IMK2) vs. all	ATLAS	level_3_annotation_full_timed	Callose_synth_0003843_modsc	0.578715	0.011615	-0.0111262	0.7280611678752259	n.s.	pos	ExtD4
5DAP 21. oi1 flavinol synthesizing (MYB11)	5DAP 21. oi1 flavinol synthesizing (MYB11) vs. all	ATLAS	level_3_annotation_full_timed	Callose_synth_0003843_modsc	0.611783	0.00942841	-0.0104223	0.7574454927533991	n.s.	pos	ExtD4
7DAP 11. MCE_ESR high PCD (ZOU and NAC074)	7DAP 11. MCE_ESR high PCD (ZOU and NAC074) vs. all	ATLAS	level_3_annotation_full_timed	Callose_synth_0003843_modsc	0.627759	0.00412177	-0.0116826	0.7650812656714024	n.s.	pos	ExtD4
3DAP 20. ii2 general (DELTAVPE and STK)	3DAP 20. ii2 general (DELTAVPE and STK) vs. all	ATLAS	level_3_annotation_full_timed	Callose_synth_0003843_modsc	0.675922	0.00154392	-0.0129318	0.8111058091083659	n.s.	pos	ExtD4
3DAP 11. OVL scenescing (BFN1)	3DAP 11. OVL scenescing (BFN1) vs. all	ATLAS	level_3_annotation_full_timed	Callose_synth_0003843_modsc	0.703574	-0.0269779	-0.0114723	0.8225383327604832	n.s.	neg	ExtD4
5DAP 1. EMB (PDF1)	5DAP 1. EMB (PDF1) vs. all	ATLAS	level_3_annotation_full_timed	Callose_synth_0003843_modsc	0.706539	0.00149263	-0.0112386	0.8225383327604832	n.s.	pos	ExtD4
5DAP 6. MCE (ALE1)	5DAP 6. MCE (ALE1) vs. all	ATLAS	level_3_annotation_full_timed	Callose_synth_0003843_modsc	0.720921	6.7592728331928e-4	-0.0111488	0.8250894243865038	n.s.	pos	ExtD4
5DAP 9. PEN general II (NAC075)	5DAP 9. PEN general II (NAC075) vs. all	ATLAS	level_3_annotation_full_timed	Callose_synth_0003843_modsc	0.737627	0.0020976	-0.0112063	0.8250894243865038	n.s.	pos	ExtD4
3DAP 28. oi2 S-phase (GLABRA2 and BARD1)	3DAP 28. oi2 S-phase (GLABRA2 and BARD1) vs. all	ATLAS	level_3_annotation_full_timed	Callose_synth_0003843_modsc	0.740465	-0.000552162	-0.0117429	0.8250894243865038	n.s.	pos	ExtD4
5DAP 23. oi1 flavinol synthesizing high PCD (MYB11, SCOOP15, BAP1)	5DAP 23. oi1 flavinol synthesizing high PCD (MYB11, SCOOP15, BAP1) vs. all	ATLAS	level_3_annotation_full_timed	Callose_synth_0003843_modsc	0.796431	-0.00154598	-0.0111426	0.8749519880870572	n.s.	pos	ExtD4
3DAP 18. ii1 basal (contains pigment strand) (BAN and SWEET4)	3DAP 18. ii1 basal (contains pigment strand) (BAN and SWEET4) vs. all	ATLAS	level_3_annotation_full_timed	Callose_synth_0003843_modsc	0.827207	-0.0191314	-0.011848	0.8770216549589698	n.s.	neg	ExtD4
3DAP 1. EMB (PDF1)	3DAP 1. EMB (PDF1) vs. all	ATLAS	level_3_annotation_full_timed	Callose_synth_0003843_modsc	0.836343	-0.0192983	-0.0116157	0.8770216549589698	n.s.	neg	ExtD4
5DAP 19. ii1' (DELTAVPE and UMAMIT29)	5DAP 19. ii1' (DELTAVPE and UMAMIT29) vs. all	ATLAS	level_3_annotation_full_timed	Callose_synth_0003843_modsc	0.838069	-0.00163102	-0.0112522	0.8770216549589698	n.s.	pos	ExtD4
7DAP 10. CZE disaccharide metabolic (ARR21)	7DAP 10. CZE disaccharide metabolic (ARR21) vs. all	ATLAS	level_3_annotation_full_timed	Callose_synth_0003843_modsc	0.847467	-0.00522835	-0.0114502	0.8770216549589698	n.s.	pos	ExtD4
7DAP 7. EMB hypophysis (SMB)	7DAP 7. EMB hypophysis (SMB) vs. all	ATLAS	level_3_annotation_full_timed	Callose_synth_0003843_modsc	0.854534	-0.00545603	-0.0114735	0.8770216549589698	n.s.	pos	ExtD4
5DAP 17. ii1 basal (contains pigment strand) (BAN and ARR22)	5DAP 17. ii1 basal (contains pigment strand) (BAN and ARR22) vs. all	ATLAS	level_3_annotation_full_timed	Callose_synth_0003843_modsc	0.919249	-0.0146013	-0.0112278	0.9311871976200704	n.s.	neg	ExtD4
5DAP 2. CZE nodule-like (MEA)	5DAP 2. CZE nodule-like (MEA) vs. all	ATLAS	level_3_annotation_full_timed	Callose_synth_0003843_modsc	0.971768	-0.00970685	-0.0112548	0.971768	n.s.	pos	ExtD4
3DAP MCE	3DAP MCE vs. all	ATLAS	level_2_annotation_timed	Chromatin_organization_GO0051276_modsc	0.955606	0.0209067	0.0200867	0.955606	n.s.	pos	ExtD10
3DAP ii1	3DAP ii1 vs. all	ATLAS	level_2_annotation_timed	Chromatin_organization_GO0051276_modsc	0.0621783	-0.00735587	0.0215417	0.140938	n.s.	neg	ExtD10
3DAP oi1	3DAP oi1 vs. all	ATLAS	level_2_annotation_timed	Chromatin_organization_GO0051276_modsc	0.408561	0.0297608	0.0181384	0.463036	n.s.	pos	ExtD10
3DAP PEN	3DAP PEN vs. all	ATLAS	level_2_annotation_timed	Chromatin_organization_GO0051276_modsc	0.00147168	0.101963	0.0186724	0.0166791	*	pos	ExtD10
3DAP ii2	3DAP ii2 vs. all	ATLAS	level_2_annotation_timed	Chromatin_organization_GO0051276_modsc	0.0806391	-0.00555893	0.0207627	0.144641	n.s.	neg	ExtD10
3DAP EMB	3DAP EMB vs. all	ATLAS	level_2_annotation_timed	Chromatin_organization_GO0051276_modsc	0.0195787	0.0652701	0.0198805	0.0832096	n.s. 0.1	pos	ExtD10
3DAP CZSC	3DAP CZSC vs. all	ATLAS	level_2_annotation_timed	Chromatin_organization_GO0051276_modsc	0.233249	0.00382078	0.020468	0.293721	n.s.	neg	ExtD10
3DAP oi2	3DAP oi2 vs. all	ATLAS	level_2_annotation_timed	Chromatin_organization_GO0051276_modsc	0.604779	0.0134791	0.0204099	0.663306	n.s.	neg	ExtD10
3DAP CPT	3DAP CPT vs. all	ATLAS	level_2_annotation_timed	Chromatin_organization_GO0051276_modsc	0.730719	0.0155904	0.0201232	0.776389	n.s.	neg	ExtD10
3DAP OVL	3DAP OVL vs. all	ATLAS	level_2_annotation_timed	Chromatin_organization_GO0051276_modsc	0.0767006	-0.00672379	0.0201678	0.144641	n.s.	neg	ExtD10
3DAP FUN	3DAP FUN vs. all	ATLAS	level_2_annotation_timed	Chromatin_organization_GO0051276_modsc	0.0391983	-0.0126431	0.0203746	0.121158	n.s.	neg	ExtD10
3DAP ii1'	3DAP ii1' vs. all	ATLAS	level_2_annotation_timed	Chromatin_organization_GO0051276_modsc	0.108907	-0.00323103	0.0204068	0.160993	n.s.	neg	ExtD10
3DAP CZE	3DAP CZE vs. all	ATLAS	level_2_annotation_timed	Chromatin_organization_GO0051276_modsc	0.0128056	0.0661493	0.0198093	0.0697197	n.s. 0.1	pos	ExtD10
5DAP PEN	5DAP PEN vs. all	ATLAS	level_2_annotation_timed	Chromatin_organization_GO0051276_modsc	1.40058726423029e-05	0.113569	0.0108371	0.0004762	***	pos	ExtD10
5DAP ii2	5DAP ii2 vs. all	ATLAS	level_2_annotation_timed	Chromatin_organization_GO0051276_modsc	0.138403	-0.00202923	0.0207414	0.196071	n.s.	neg	ExtD10
5DAP oi1	5DAP oi1 vs. all	ATLAS	level_2_annotation_timed	Chromatin_organization_GO0051276_modsc	0.316949	0.00556197	0.0255639	0.371595	n.s.	neg	ExtD10
5DAP oi2	5DAP oi2 vs. all	ATLAS	level_2_annotation_timed	Chromatin_organization_GO0051276_modsc	0.0759361	-0.00999463	0.0226523	0.144641	n.s.	neg	ExtD10
5DAP CZSC	5DAP CZSC vs. all	ATLAS	level_2_annotation_timed	Chromatin_organization_GO0051276_modsc	0.0866581	-0.00659668	0.0208198	0.144641	n.s.	neg	ExtD10
5DAP MCE	5DAP MCE vs. all	ATLAS	level_2_annotation_timed	Chromatin_organization_GO0051276_modsc	0.0107024	0.100543	0.0195602	0.0697197	n.s. 0.1	pos	ExtD10
5DAP CZE	5DAP CZE vs. all	ATLAS	level_2_annotation_timed	Chromatin_organization_GO0051276_modsc	0.000632232	0.098173	0.0192687	0.0107479	*	pos	ExtD10
5DAP ii1	5DAP ii1 vs. all	ATLAS	level_2_annotation_timed	Chromatin_organization_GO0051276_modsc	0.173641	0.000448069	0.0205301	0.236152	n.s.	neg	ExtD10
5DAP ii1'	5DAP ii1' vs. all	ATLAS	level_2_annotation_timed	Chromatin_organization_GO0051276_modsc	0.268827	0.00423109	0.0203246	0.326433	n.s.	neg	ExtD10
5DAP CPT	5DAP CPT vs. all	ATLAS	level_2_annotation_timed	Chromatin_organization_GO0051276_modsc	0.10821	-0.00440805	0.0203328	0.160993	n.s.	neg	ExtD10
5DAP EMB	5DAP EMB vs. all	ATLAS	level_2_annotation_timed	Chromatin_organization_GO0051276_modsc	0.0107518	0.0649107	0.0198739	0.0697197	n.s. 0.1	pos	ExtD10
5DAP FUN	5DAP FUN vs. all	ATLAS	level_2_annotation_timed	Chromatin_organization_GO0051276_modsc	0.0143541	-0.0254064	0.0202098	0.0697197	n.s. 0.1	neg	ExtD10
7DAP oi2	7DAP oi2 vs. all	ATLAS	level_2_annotation_timed	Chromatin_organization_GO0051276_modsc	0.0474034	-0.010495	0.0202835	0.132988	n.s.	neg	ExtD10
7DAP EMB	7DAP EMB vs. all	ATLAS	level_2_annotation_timed	Chromatin_organization_GO0051276_modsc	0.910423	0.0156978	0.017472	0.938011	n.s.	neg	ExtD10
7DAP MCE	7DAP MCE vs. all	ATLAS	level_2_annotation_timed	Chromatin_organization_GO0051276_modsc	0.0552366	-0.00811426	0.0206118	0.134146	n.s.	neg	ExtD10
7DAP CZE	7DAP CZE vs. all	ATLAS	level_2_annotation_timed	Chromatin_organization_GO0051276_modsc	0.0866536	-0.00452599	0.0204635	0.144641	n.s.	neg	ExtD10
7DAP oi1	7DAP oi1 vs. all	ATLAS	level_2_annotation_timed	Chromatin_organization_GO0051276_modsc	0.0893369	-0.0043674	0.0204254	0.144641	n.s.	neg	ExtD10
7DAP PEN	7DAP PEN vs. all	ATLAS	level_2_annotation_timed	Chromatin_organization_GO0051276_modsc	0.222968	0.00286745	0.0200799	0.291573	n.s.	neg	ExtD10
7DAP ii1'	7DAP ii1' vs. all	ATLAS	level_2_annotation_timed	Chromatin_organization_GO0051276_modsc	0.0377183	-0.0128932	0.020195	0.121158	n.s.	neg	ExtD10
7DAP CZSC	7DAP CZSC vs. all	ATLAS	level_2_annotation_timed	Chromatin_organization_GO0051276_modsc	0.0508482	-0.0100371	0.0202436	0.132988	n.s.	neg	ExtD10
7DAP ii1	7DAP ii1 vs. all	ATLAS	level_2_annotation_timed	Chromatin_organization_GO0051276_modsc	0.024578	-0.0167857	0.0202541	0.0928502	n.s. 0.1	neg	ExtD10
3DAP MCE	3DAP MCE vs. all	ATLAS	level_2_annotation_timed	Protein_catabol_GO0030163_modsc	0.955606	0.0209067	0.0200867	0.955606	n.s.	pos	ExtD10
3DAP ii1	3DAP ii1 vs. all	ATLAS	level_2_annotation_timed	Protein_catabol_GO0030163_modsc	0.0621783	-0.00735587	0.0215417	0.140938	n.s.	neg	ExtD10
3DAP oi1	3DAP oi1 vs. all	ATLAS	level_2_annotation_timed	Protein_catabol_GO0030163_modsc	0.408561	0.0297608	0.0181384	0.463036	n.s.	pos	ExtD10
3DAP PEN	3DAP PEN vs. all	ATLAS	level_2_annotation_timed	Protein_catabol_GO0030163_modsc	0.00147168	0.101963	0.0186724	0.0166791	*	pos	ExtD10
3DAP ii2	3DAP ii2 vs. all	ATLAS	level_2_annotation_timed	Protein_catabol_GO0030163_modsc	0.0806391	-0.00555893	0.0207627	0.144641	n.s.	neg	ExtD10
3DAP EMB	3DAP EMB vs. all	ATLAS	level_2_annotation_timed	Protein_catabol_GO0030163_modsc	0.0195787	0.0652701	0.0198805	0.0832096	n.s. 0.1	pos	ExtD10
3DAP CZSC	3DAP CZSC vs. all	ATLAS	level_2_annotation_timed	Protein_catabol_GO0030163_modsc	0.233249	0.00382078	0.020468	0.293721	n.s.	neg	ExtD10
3DAP oi2	3DAP oi2 vs. all	ATLAS	level_2_annotation_timed	Protein_catabol_GO0030163_modsc	0.604779	0.0134791	0.0204099	0.663306	n.s.	neg	ExtD10
3DAP CPT	3DAP CPT vs. all	ATLAS	level_2_annotation_timed	Protein_catabol_GO0030163_modsc	0.730719	0.0155904	0.0201232	0.776389	n.s.	neg	ExtD10
3DAP OVL	3DAP OVL vs. all	ATLAS	level_2_annotation_timed	Protein_catabol_GO0030163_modsc	0.0767006	-0.00672379	0.0201678	0.144641	n.s.	neg	ExtD10
3DAP FUN	3DAP FUN vs. all	ATLAS	level_2_annotation_timed	Protein_catabol_GO0030163_modsc	0.0391983	-0.0126431	0.0203746	0.121158	n.s.	neg	ExtD10
3DAP ii1'	3DAP ii1' vs. all	ATLAS	level_2_annotation_timed	Protein_catabol_GO0030163_modsc	0.108907	-0.00323103	0.0204068	0.160993	n.s.	neg	ExtD10
3DAP CZE	3DAP CZE vs. all	ATLAS	level_2_annotation_timed	Protein_catabol_GO0030163_modsc	0.0128056	0.0661493	0.0198093	0.0697197	n.s. 0.1	pos	ExtD10
5DAP PEN	5DAP PEN vs. all	ATLAS	level_2_annotation_timed	Protein_catabol_GO0030163_modsc	1.40058726423029e-05	0.113569	0.0108371	0.0004762	***	pos	ExtD10
5DAP ii2	5DAP ii2 vs. all	ATLAS	level_2_annotation_timed	Protein_catabol_GO0030163_modsc	0.138403	-0.00202923	0.0207414	0.196071	n.s.	neg	ExtD10
5DAP oi1	5DAP oi1 vs. all	ATLAS	level_2_annotation_timed	Protein_catabol_GO0030163_modsc	0.316949	0.00556197	0.0255639	0.371595	n.s.	neg	ExtD10
5DAP oi2	5DAP oi2 vs. all	ATLAS	level_2_annotation_timed	Protein_catabol_GO0030163_modsc	0.0759361	-0.00999463	0.0226523	0.144641	n.s.	neg	ExtD10
5DAP CZSC	5DAP CZSC vs. all	ATLAS	level_2_annotation_timed	Protein_catabol_GO0030163_modsc	0.0866581	-0.00659668	0.0208198	0.144641	n.s.	neg	ExtD10
5DAP MCE	5DAP MCE vs. all	ATLAS	level_2_annotation_timed	Protein_catabol_GO0030163_modsc	0.0107024	0.100543	0.0195602	0.0697197	n.s. 0.1	pos	ExtD10
5DAP CZE	5DAP CZE vs. all	ATLAS	level_2_annotation_timed	Protein_catabol_GO0030163_modsc	0.000632232	0.098173	0.0192687	0.0107479	*	pos	ExtD10
5DAP ii1	5DAP ii1 vs. all	ATLAS	level_2_annotation_timed	Protein_catabol_GO0030163_modsc	0.173641	0.000448069	0.0205301	0.236152	n.s.	neg	ExtD10
5DAP ii1'	5DAP ii1' vs. all	ATLAS	level_2_annotation_timed	Protein_catabol_GO0030163_modsc	0.268827	0.00423109	0.0203246	0.326433	n.s.	neg	ExtD10
5DAP CPT	5DAP CPT vs. all	ATLAS	level_2_annotation_timed	Protein_catabol_GO0030163_modsc	0.10821	-0.00440805	0.0203328	0.160993	n.s.	neg	ExtD10
5DAP EMB	5DAP EMB vs. all	ATLAS	level_2_annotation_timed	Protein_catabol_GO0030163_modsc	0.0107518	0.0649107	0.0198739	0.0697197	n.s. 0.1	pos	ExtD10
5DAP FUN	5DAP FUN vs. all	ATLAS	level_2_annotation_timed	Protein_catabol_GO0030163_modsc	0.0143541	-0.0254064	0.0202098	0.0697197	n.s. 0.1	neg	ExtD10
7DAP oi2	7DAP oi2 vs. all	ATLAS	level_2_annotation_timed	Protein_catabol_GO0030163_modsc	0.0474034	-0.010495	0.0202835	0.132988	n.s.	neg	ExtD10
7DAP EMB	7DAP EMB vs. all	ATLAS	level_2_annotation_timed	Protein_catabol_GO0030163_modsc	0.910423	0.0156978	0.017472	0.938011	n.s.	neg	ExtD10
7DAP MCE	7DAP MCE vs. all	ATLAS	level_2_annotation_timed	Protein_catabol_GO0030163_modsc	0.0552366	-0.00811426	0.0206118	0.134146	n.s.	neg	ExtD10
7DAP CZE	7DAP CZE vs. all	ATLAS	level_2_annotation_timed	Protein_catabol_GO0030163_modsc	0.0866536	-0.00452599	0.0204635	0.144641	n.s.	neg	ExtD10
7DAP oi1	7DAP oi1 vs. all	ATLAS	level_2_annotation_timed	Protein_catabol_GO0030163_modsc	0.0893369	-0.0043674	0.0204254	0.144641	n.s.	neg	ExtD10
7DAP PEN	7DAP PEN vs. all	ATLAS	level_2_annotation_timed	Protein_catabol_GO0030163_modsc	0.222968	0.00286745	0.0200799	0.291573	n.s.	neg	ExtD10
7DAP ii1'	7DAP ii1' vs. all	ATLAS	level_2_annotation_timed	Protein_catabol_GO0030163_modsc	0.0377183	-0.0128932	0.020195	0.121158	n.s.	neg	ExtD10
7DAP CZSC	7DAP CZSC vs. all	ATLAS	level_2_annotation_timed	Protein_catabol_GO0030163_modsc	0.0508482	-0.0100371	0.0202436	0.132988	n.s.	neg	ExtD10
7DAP ii1	7DAP ii1 vs. all	ATLAS	level_2_annotation_timed	Protein_catabol_GO0030163_modsc	0.024578	-0.0167857	0.0202541	0.0928502	n.s. 0.1	neg	ExtD10
