# Supplementary material for: A transcriptional atlas of early Arabidopsis seed development suggests mechanisms for inter-tissue coordination
Source: Research Square preprint supplement (doi:10.21203/rs.3.rs-6560595/v1), 2025-05-16
Supplement: Supplementary file 8 [file eb3405fd23cda25f5f5e471a.xlsx]

## Sheet: README
Supplementary Table 7. Genome-wide dN/dS and M2a/M1a LRT results
README
Table of contents:
1. Genome-wide dNdS, GY94
→ orthologr results for a genome wide analysis of A. thaliana and A. lyrata 1:1 orthologs
2. All M2a-M1a results
→ codeml site model results for 22307 genes. These were generated from trees of 3-4 orthologs with each A. thaliana gene's single best ortholog in B. rapa, C. grandiflora, and A. lyrata
• M2a_vs_M1a_LRT: Log likelihood test statistic for the gene under the M2a model vs. M1a 2*(lnL(M2a)-lnL(M1a)
• M2a_vs_M1a_pval: pvalue from a chi-squared test using the LRT with 2 degrees of freedom
• M2a_vs_M1a_padj: Benjamini-Hochberg corrected p-value
3. M2a-M1a data for L2 DE genes
→ Contains all gene DE data for L2 clusters with matched M2a/M1a LRT data. DE values generated within timepoints in a cluster vs. all comparison. The M2aM1a results for the first isoform are assigned to each gene
4. GO for M2a-M1a-sig CZE DE
→ Contains all genes DE (log2FC > 1, adj. p-val < 0.05) in the CZE that have a significantly high M2a/M1a LRT (adj. p-val < 0.05)

## Sheet: 1. Genome-wide dNdS, NG86
	query_id	subject_id	dN	dS	dNdS	method	perc_identity	num_ident_matches	alig_length	mismatches	gap_openings	n_gaps	pos_match	ppos	q_start	q_end	q_len	qcov	qcovhsp	s_start	s_end	s_len	evalue	bit_score	score_raw
1	AT1G01010.1	AL1G11530.t1	0.106249	0.253877	0.418505	NG	73.2	347	474	75	8	52	369	77.8	1	430	430	100	100	1	466	466	1.88e-208	582	1500
2	AT1G01020.1	AL1G11510.t1	0.0396891	0.110186	0.360202	NG	91.1	224	246	22	0	0	231	93.9	1	246	246	100	100	1	246	246	3.12e-153	426	1094
3	AT1G01030.1	AL1G11500.t1	0.0559755	0.215492	0.259756	NG	92.6	276	298	19	1	3	278	93.3	1	298	359	83	83	1	295	323	1.23e-186	518	1334
4	AT1G01040.2	AL1G11480.t1	0.0136378	0.12694	0.107435	NG	96.2	1843	1915	58	8	14	1873	97.8	1	1911	1911	100	100	1	1905	1905	0	3567	9249
5	AT1G01050.1	AL1G11470.t1	NA	0.16971	0	NG	100	213	213	0	0	0	213	100	1	213	213	100	100	1	213	213	6.14e-155	427	1098
6	AT1G01060.1	AL1G11460.t1	0.0418643	0.13315	0.314416	NG	86.5	566	654	71	7	17	585	89.4	1	646	646	100	100	1	645	645	0	1015	2625
7	AT1G01070.1	AL1G11450.t1	0.0189283	0.103359	0.183131	NG	92.6	339	366	23	2	4	342	93.4	1	366	366	100	100	1	362	362	8.25e-224	614	1583
8	AT1G01080.1	AL1G11440.t1	0.0321926	0.113087	0.284672	NG	82	268	327	25	3	34	275	84.1	1	294	294	100	100	1	326	326	2.54e-172	479	1233
9	AT1G01090.1	AL1G11430.t1	0.00923781	0.218484	0.0422814	NG	96.8	420	434	8	3	6	425	97.9	1	429	429	100	100	1	433	433	7.43e-302	817	2110
10	AT1G01110.2	AL1G11410.t1	0.0322706	0.13915	0.231913	NG	87.7	463	528	65	0	0	475	90	1	528	528	100	100	1	528	528	1.62e-305	837	2162
11	AT1G01120.1	AL1G11400.t1	0.00331503	0.15019	0.0220722	NG	99.2	525	529	4	0	0	527	99.6	1	529	529	100	100	1	529	529	0	1029	2661
12	AT1G01140.1	AL1G11370.t1	0.00340912	0.131335	0.0259575	NG	99.2	375	378	3	0	0	376	99.5	71	448	448	84.4	84.4	1	378	378	8.41e-272	739	1909
13	AT1G01150.3	AL1G11350.t1	0.119569	0.19087	0.62644	NG	73	211	289	68	3	10	238	82.4	5	293	293	98.6	98.6	16	294	294	3.53e-148	417	1071
14	AT1G01160.1	AL1G11340.t1	0.0353039	0.143241	0.246464	NG	81	162	200	30	2	8	166	83	4	196	196	98.5	98.5	2	200	200	4.69e-106	302	774
15	AT1G01170.1	AL1G11330.t1	NA	0.263291	0	NG	100	83	83	0	0	0	83	100	2	84	84	98.8	98.8	4	86	86	1.1e-57	171	433
16	AT1G01180.1	AL1G11320.t1	0.0286122	0.1485	0.192675	NG	93.2	290	311	18	1	3	297	95.5	1	308	308	100	100	1	311	311	5.67e-215	587	1513
17	AT1G01190.1	AL1G11290.t1	0.0277509	0.173805	0.159667	NG	94.3	484	513	28	1	1	498	97.1	21	533	536	95.7	95.7	1	512	515	0	971	2511
18	AT1G01200.1	AL1G11280.t1	0.0185932	0.182749	0.101742	NG	95.8	228	238	10	0	0	233	97.9	1	238	238	100	100	1	238	238	9.55e-160	441	1135
19	AT1G01210.1	AL1G11270.t1	0.0204245	0.158867	0.128564	NG	95.3	102	107	5	0	0	105	98.1	1	107	107	100	100	1	107	107	2.81e-77	222	566
20	AT1G01220.1	AL1G11260.t1	0.0154563	0.160756	0.0961473	NG	96.4	1018	1056	38	0	0	1034	97.9	1	1056	1056	100	100	1	1056	1056	0	2014	5217
21	AT1G01225.1	AL1G11250.t1	0.0155208	0.109878	0.141255	NG	94.3	247	262	8	3	7	253	96.6	1	261	261	100	100	1	256	256	5.74e-169	466	1200
22	AT1G01230.1	AL1G11230.t1	0.00274346	0.0692447	0.0396197	NG	99.4	157	158	1	0	0	158	100	1	158	158	100	100	1	158	158	1.88e-122	340	873
23	AT1G01240.1	AL1G11220.t1	0.040459	0.150012	0.269705	NG	90.1	302	335	30	2	3	314	93.7	1	332	332	100	100	1	335	335	1.16e-210	578	1490
24	AT1G01250.1	AL1G11210.t1	0.0191196	0.0951964	0.200843	NG	90.4	170	188	17	1	1	175	93.1	6	193	193	97.4	97.4	1	187	187	1.12e-123	346	888
25	AT1G01260.1	AL1G11200.t1	0.0168148	0.195047	0.086209	NG	94.6	563	595	25	3	7	576	96.8	1	591	591	100	100	1	592	592	0	1057	2733
26	AT1G01280.1	AL1G11180.t1	0.02856	0.170874	0.167141	NG	94.9	314	331	17	0	0	320	96.7	180	510	511	64.8	64.8	1	331	337	5.65e-239	657	1696
27	AT1G01290.1	AL1G11170.t1	0.0408676	0.239593	0.170571	NG	90	206	229	16	3	7	213	93	47	269	271	82.3	82.3	1	228	231	1.96e-136	384	985
28	AT1G01300.1	AL1G11160.t1	0.0112705	0.179284	0.0628642	NG	96.1	469	488	15	2	4	471	96.5	1	486	486	100	100	1	486	486	0	918	2373
29	AT1G01305.1	AL1G11150.t1	0.0723141	0.180507	0.400616	NG	85.9	122	142	20	0	0	132	93	1	142	142	100	100	1	142	142	4.08e-89	255	651
30	AT1G01310.1	AL1G11140.t1	0.0350963	0.0878561	0.399475	NG	90.9	220	242	22	0	0	226	93.4	1	242	242	100	100	1	242	242	2.77e-170	468	1205
31	AT1G01320.1	AL1G11130.t1	0.0197088	0.115509	0.170626	NG	93.8	1690	1802	92	4	20	1722	95.6	1	1798	1798	100	100	1	1786	1786	0	2834	7347
32	AT1G01340.1	AL6G52390.t1	0.108668	0.848361	0.128092	NG	79.1	558	705	126	5	21	612	86.8	2	702	707	99.2	99.2	21	708	710	0	1072	2772
33	AT1G01340.2	AL6G52390.t3	0.102576	0.835979	0.122702	NG	79.4	567	714	122	7	25	621	87	1	707	712	99.3	99.3	1	696	698	0	1086	2808
34	AT1G01350.1	AL1G11100.t1	0.0174515	0.19008	0.0918111	NG	95.6	329	344	14	1	1	334	97.1	1	344	344	100	100	1	343	343	1.78e-226	619	1596
35	AT1G01355.3	AL1G11090.t1	0.0928061	0.188542	0.492231	NG	83.1	118	142	22	1	2	127	89.4	11	150	225	62.2	62.2	24	165	172	5e-81	239	610
36	AT1G01360.1	AL1G11084.t1	0.0248353	0.128579	0.193152	NG	95.7	179	187	8	0	0	184	98.4	1	187	188	99.5	99.5	1	187	191	1.77e-131	366	939
37	AT1G01370.1	AL1G59290.t1	0.0754325	0.147016	0.513091	NG	78.8	141	179	35	1	3	148	82.7	1	179	179	100	100	1	176	176	6.92e-89	257	657
38	AT1G01380.1	AL1G11070.t1	0.0154445	0.0799428	0.193195	NG	96.4	81	84	3	0	0	83	98.8	1	84	84	100	100	1	84	84	1.6e-52	158	399
39	AT1G01390.1	AL1G11060.t1	0.0457114	0.130559	0.350121	NG	91.1	438	481	43	0	0	459	95.4	1	481	481	100	100	1	481	481	0	876	2263
40	AT1G01400.1	AL1G11050.t1	0.147609	0.146113	1.01024	NG	35.3	65	184	100	7	19	81	44	38	202	205	80.5	80.5	95	278	322	2.53e-12	64.3	155
41	AT1G01410.1	AL1G11040.t1	0.0517203	0.13698	0.377576	NG	89.5	324	362	37	1	1	341	94.2	1	362	362	100	100	75	435	435	1.77e-230	634	1634
42	AT1G01420.1	AL1G11030.t1	0.0463924	0.105292	0.440607	NG	87.9	372	423	41	1	10	394	93.1	1	423	482	87.8	87.8	1	413	414	2.03e-276	754	1947
43	AT1G01430.1	AL1G11020.t1	0.046167	0.136106	0.3392	NG	89.1	408	458	40	4	10	428	93.4	1	457	457	100	100	1	449	449	2.7e-305	848	2190
44	AT1G01440.1	AL1G11010.t1	0.0389381	0.13818	0.281792	NG	85.8	576	671	82	7	13	598	89.1	1	665	665	100	100	1	664	664	0	1088	2815
45	AT1G01450.1	AL1G10990.t1	0.0624103	0.192217	0.324688	NG	95	417	439	21	1	1	428	97.5	1	439	471	93.2	93.2	208	645	694	1.24e-303	834	2154
46	AT1G01453.1	AL1G10980.t1	0.0436774	0.204796	0.213273	NG	85.7	233	272	31	2	8	240	88.2	1	268	268	100	100	1	268	268	4.73e-152	424	1091
47	AT1G01460.1	AL1G10960.t1	0.018787	0.191627	0.0980391	NG	89	381	428	46	1	1	385	90	1	428	428	100	100	1	427	427	1.14e-269	735	1898
48	AT1G01480.1	AL1G10930.t1	0.0215224	0.143414	0.150072	NG	95.2	473	497	24	0	0	489	98.4	1	497	497	100	100	1	497	497	0	954	2467
49	AT1G01490.1	AL1G10920.t1	0.00726615	0.173644	0.0418452	NG	95.5	170	178	8	0	0	172	96.6	1	178	178	100	100	1	178	178	2.73e-93	268	686
50	AT1G01500.1	AL1G10910.t1	0.0159517	0.0799907	0.19942	NG	95.8	296	309	12	1	1	302	97.7	21	328	328	93.9	93.9	1	309	309	4.1e-199	548	1411
51	AT1G01510.1	AL1G10900.t1	0.00552978	0.0932993	0.0592692	NG	98.7	629	637	8	0	0	634	99.5	1	637	637	100	100	1	637	637	0	1196	3095
52	AT1G01520.1	AL1G10890.t1	0.0486553	0.202975	0.239711	NG	77.7	223	287	24	4	40	236	82.2	1	286	288	99.3	99.3	1	248	250	1.28e-150	421	1082
53	AT1G01540.2	AL1G10860.t1	0.00514694	0.223756	0.0230024	NG	99.2	469	473	4	0	0	470	99.4	1	473	473	100	100	1	473	473	0	915	2364
54	AT1G01550.1	AL1G10850.t1	0.0177121	0.146998	0.120492	NG	96.3	337	350	13	0	0	342	97.7	1	350	350	100	100	1	350	350	9.78e-241	655	1691
55	AT1G01560.2	AL1G10840.t1	0.0105594	0.12201	0.0865448	NG	97.6	360	369	9	0	0	362	98.1	1	369	370	99.7	99.7	1	369	373	3.59e-272	737	1902
56	AT1G01570.2	AL1G10830.t1	0.0245223	0.16407	0.149462	NG	94.1	482	512	27	2	3	494	96.5	1	510	510	100	100	1	511	511	0	981	2537
57	AT1G01580.1	AL1G10810.t1	0.0166139	0.122915	0.135166	NG	96.1	699	727	26	2	2	711	97.8	1	726	726	100	100	1	726	726	0	1352	3498
58	AT1G01600.1	AL6G53070.t1	0.0620567	0.831763	0.0746086	NG	87.9	489	556	62	4	5	520	93.5	1	553	555	99.6	99.6	1	554	555	0	994	2569
59	AT1G01610.1	AL1G10770.t1	0.00880489	0.0967415	0.0910147	NG	98	494	504	9	1	1	501	99.4	1	504	504	100	100	1	503	503	0	970	2508
60	AT1G01620.1	AL1G10760.t1	0.00311571	0.104774	0.0297376	NG	99.3	285	287	2	0	0	286	99.7	1	287	287	100	100	1	287	287	5.29e-211	575	1482
61	AT1G01630.1	AL1G10750.t1	0.0212204	0.112458	0.188696	NG	94.9	244	257	12	1	1	248	96.5	1	256	256	100	100	1	257	257	1.8e-180	495	1275
62	AT1G01640.2	AL1G10740.t1	0.0286767	0.0687369	0.417195	NG	93	146	157	9	2	2	148	94.3	33	187	187	82.9	82.9	1	157	157	6.23e-99	282	722
63	AT1G01650.1	AL1G10720.t1	0.00654634	0.0920231	0.071138	NG	98.5	533	541	8	0	0	539	99.6	1	541	541	100	100	1	541	541	0	1065	2753
64	AT1G01660.2	AL1G10710.t1	0.0139138	0.104168	0.13357	NG	96.7	551	570	19	0	0	558	97.9	1	570	570	100	100	1	570	570	5.31e-270	748	1931
65	AT1G01670.1	AL1G10700.t1	0.0396633	0.116581	0.34022	NG	90.1	335	372	31	2	6	350	94.1	1	366	366	100	100	1	372	372	6.1e-233	637	1644
66	AT1G01680.1	AL1G10690.t1	0.0338718	0.0849001	0.39896	NG	92.6	287	310	22	1	1	293	94.5	1	309	309	100	100	1	310	310	1.87e-204	560	1444
67	AT1G01690.1	AL1G10680.t1	0.0267737	0.104868	0.255308	NG	92.3	418	453	32	3	3	428	94.5	1	452	452	100	100	1	451	451	9.75e-267	730	1884
68	AT1G01690.3	AL1G10680.t2	0.0268347	0.105118	0.255282	NG	92.3	417	452	32	3	3	427	94.5	1	451	451	100	100	1	450	450	6.06e-265	725	1872
69	AT1G01695.1	AL1G10670.t1	0.0468547	0.108068	0.433569	NG	84.3	382	453	43	8	28	404	89.2	1	427	434	98.4	98.4	1	451	453	2.6e-253	695	1794
70	AT1G01710.1	AL1G10650.t1	0.0154901	0.0912531	0.169749	NG	96.5	413	428	15	0	0	425	99.3	1	428	428	100	100	1	428	428	2.19e-305	846	2185
71	AT1G01715.1	AL1G10640.t1	0.0656604	0.197974	0.331661	NG	77.9	116	149	20	4	13	126	84.6	1	140	140	100	100	1	145	145	4.97e-65	194	493
72	AT1G01720.1	AL1G10630.t1	0.00748863	0.138336	0.0541338	NG	95.3	284	298	4	3	10	285	95.6	1	290	290	100	100	1	296	296	9.79e-178	491	1265
73	AT1G01730.1	AL1G10610.t1	0.0542263	0.0853716	0.63518	NG	79.3	180	227	40	3	7	188	82.8	1	225	225	100	100	1	222	222	3.63e-111	317	813
74	AT1G01740.1	AL1G10600.t1	0.0307665	0.0730387	0.421236	NG	92.6	451	487	33	1	3	467	95.9	1	484	484	100	100	1	487	487	0	892	2304
75	AT1G01750.1	AL1G10590.t1	0.00897189	0.0494301	0.181507	NG	97.9	138	141	3	0	0	141	100	1	141	141	100	100	1	141	141	1.09e-97	276	707
76	AT1G01760.3	AL1G10580.t1	0.0350318	0.0795869	0.44017	NG	93.2	399	428	29	0	0	410	95.8	7	434	434	98.6	98.6	4	431	431	3.99e-284	772	1994
77	AT1G01770.1	AL1G10570.t1	0.0239889	0.108367	0.221367	NG	94.8	603	636	30	1	3	621	97.6	1	633	633	100	100	1	636	636	0	1227	3174
78	AT1G01780.1	AL1G10560.t1	0.0147229	0.111729	0.131774	NG	97.1	200	206	6	0	0	204	99	1	206	206	100	100	1	206	206	3.58e-155	427	1098
79	AT1G01790.1	AL6G52810.t1	0.112879	0.613869	0.183881	NG	73.4	882	1202	281	11	39	962	80	1	1192	1194	99.8	99.8	1	1173	1174	0	1486	3848
80	AT1G01800.1	AL1G10540.t1	0.0195529	0.12308	0.158864	NG	95.9	284	296	12	0	0	292	98.6	1	296	296	100	100	1	296	296	1.81e-202	554	1428
81	AT1G01810.1	AL1G10520.t1	0.0657617	0.140259	0.468858	NG	72.8	118	162	26	3	18	123	75.9	1	161	161	100	100	1	145	145	2.02e-53	166	419
82	AT1G01820.1	AL1G10510.t1	0.0113477	0.126149	0.0899546	NG	97.9	231	236	5	0	0	235	99.6	1	236	236	100	100	5	240	240	1.46e-163	451	1160
83	AT1G01830.1	AL1G10490.t1	0.0171621	0.138395	0.124008	NG	95.3	548	575	25	2	2	556	96.7	1	575	575	100	100	1	573	573	7.14e-289	796	2056
84	AT1G01840.1	AL1G10480.t1	0.0232834	0.13848	0.168136	NG	88.9	136	153	7	2	10	140	91.5	1	153	153	100	100	1	143	143	3.36e-82	238	607
85	AT1G01860.1	AL1G10470.t1	0.0181807	0.110373	0.16472	NG	95.3	328	344	14	2	2	333	96.8	2	344	344	99.7	99.7	1	343	343	1.94e-230	629	1622
86	AT1G01880.1	AL1G10450.t1	0.0326112	0.129956	0.25094	NG	86.4	522	604	50	4	32	540	89.4	1	600	600	100	100	1	576	576	0	1016	2628
87	AT1G01900.1	AL1G10430.t1	0.0252726	0.188546	0.134039	NG	95.1	721	758	37	0	0	738	97.4	18	775	775	97.8	97.8	1	758	758	0	1380	3573
88	AT1G01910.1	AL1G10420.t1	0.00489432	0.137333	0.0356383	NG	98.9	350	354	4	0	0	353	99.7	1	354	354	100	100	1	354	354	1.16e-250	681	1757
89	AT1G01920.1	AL1G10410.t1	0.0372939	0.0796274	0.468355	NG	88.2	506	574	39	5	29	518	90.2	2	573	573	99.8	99.8	3	549	549	0	974	2517
90	AT1G01930.1	AL1G10390.t1	0.0268826	0.122936	0.218672	NG	92.9	471	507	29	3	7	478	94.3	1	504	581	86.7	86.7	1	503	580	1.39e-305	864	2233
91	AT1G01940.1	AL1G10380.t1	0.00536753	0.145198	0.0369671	NG	98.8	159	161	2	0	0	160	99.4	1	161	161	100	100	1	161	161	2.19e-118	330	847
92	AT1G01950.3	AL1G10370.t1	0.00591232	0.0801859	0.0737326	NG	96.3	883	917	12	2	22	890	97.1	1	916	916	100	100	1	896	896	0	1422	3682
93	AT1G01960.1	AL5G43180.t1	0.165866	1.98237	0.0836702	NG	71.7	1288	1797	457	14	52	1496	83.2	1	1749	1751	99.9	99.9	1	1793	1794	0	2456	6364
94	AT1G01970.1	AL1G10350.t1	0.0235322	0.155709	0.151129	NG	95.9	393	410	17	0	0	398	97.1	1	410	410	100	100	1	410	410	1.51e-152	437	1124
95	AT1G01980.1	AL1G10340.t1	0.0178586	0.149452	0.119494	NG	95.9	520	542	22	0	0	527	97.2	1	542	542	100	100	1	542	542	0	1047	2708
96	AT1G01990.1	AL1G10330.t1	0.0463333	0.199468	0.232284	NG	78	195	250	44	4	11	205	82	1	246	246	100	100	1	243	243	4.2e-125	354	909
97	AT1G02000.1	AL1G10320.t1	0.0102588	0.158739	0.0646265	NG	97.2	423	435	9	3	3	427	98.2	1	433	435	99.5	99.5	1	434	435	6.01e-305	838	2164
98	AT1G02010.4	AL1G10310.t1	0.0045108	0.0639906	0.0704915	NG	93.3	665	713	7	3	41	670	94	1	704	704	100	100	1	681	681	0	1271	3289
99	AT1G02020.1	AL1G10260.t1	0.0402418	0.134308	0.299623	NG	87.2	560	642	54	7	28	576	89.7	5	643	643	99.4	99.4	257	873	873	0	1110	2871
100	AT1G02040.1	AL1G10250.t1	0.0112648	0.134058	0.0840295	NG	95.9	258	269	6	4	5	259	96.3	58	325	325	82.5	82.5	1	265	265	7.82e-165	459	1181
101	AT1G02050.1	AL1G10240.t1	0.0100913	0.0731058	0.138036	NG	97.7	386	395	8	1	1	390	98.7	1	394	396	99.5	99.5	1	395	397	1.28e-280	760	1963
102	AT1G02060.1	AL1G10230.t1	0.0380748	0.150545	0.252913	NG	90.1	643	714	67	3	4	671	94	1	711	711	100	100	21	733	733	0	899	2322
103	AT1G02065.1	AL1G10220.t1	0.0381998	0.216626	0.176339	NG	89.6	300	335	23	6	12	303	90.4	1	334	334	100	100	1	324	324	1.61e-171	479	1232
104	AT1G02070.1	AL1G10180.t1	0.0778532	0.180246	0.431929	NG	83.5	106	127	20	1	1	111	87.4	7	132	132	95.5	95.5	1	127	127	4.32e-76	221	563
105	AT1G02080.1	AL1G10200.t2	0.0198422	0.110345	0.179819	NG	95	2269	2389	102	6	18	2309	96.7	54	2432	2432	97.8	97.8	1	2381	2381	0	4331	11233
106	AT1G02090.1	AL1G10140.t1	0.0202041	0.108607	0.186029	NG	95.4	249	261	12	0	0	257	98.5	1	261	261	100	100	1	261	261	2.45e-178	490	1262
107	AT1G02100.1	AL1G10130.t1	0.0299912	0.117955	0.254259	NG	94.9	318	335	15	2	2	326	97.3	1	333	333	100	100	1	335	335	7.27e-228	622	1603
108	AT1G02110.1	AL1G10120.t1	0.0170917	0.0943666	0.18112	NG	95.2	671	705	28	4	6	680	96.5	1	704	704	100	100	1	700	700	0	1263	3269
109	AT1G02120.1	AL1G10110.t1	0.0240238	0.0878092	0.273591	NG	93.1	566	608	33	1	9	587	96.5	1	599	599	100	100	1	608	608	0	1074	2778
110	AT1G02130.1	AL1G10104.t1	0.00845644	0.130784	0.0646598	NG	98	200	204	4	0	0	203	99.5	1	204	204	100	100	1	204	204	1.02e-144	400	1029
111	AT1G02140.1	AL1G10090.t1	0.00857745	0.0862009	0.0995053	NG	98.7	149	151	2	0	0	150	99.3	1	151	151	100	100	1	151	151	2.32e-106	299	766
112	AT1G02145.1	AL1G10080.t1	0.0157649	0.0759394	0.207599	NG	95.7	471	492	17	1	4	479	97.4	7	494	494	98.8	98.8	1	492	492	0	937	2422
113	AT1G02150.1	AL1G10070.t1	0.0200654	0.0643338	0.311896	NG	95.4	501	525	23	1	1	507	96.6	1	525	525	100	100	1	524	524	2.3e-305	867	2239
114	AT1G02160.1	AL1G10060.t1	0.0122491	0.0647159	0.189274	NG	97.2	70	72	2	0	0	71	98.6	1	72	72	100	100	1	72	72	1.19e-44	137	345
115	AT1G02170.1	AL1G10050.t1	0.00334455	0.134593	0.0248493	NG	97	258	266	5	1	3	259	97.4	106	368	368	71.5	71.5	1	266	266	4.17e-185	512	1319
116	AT1G02180.1	AL1G10040.t1	0.0431507	0.12765	0.338039	NG	91.1	205	225	20	0	0	213	94.7	1	225	227	99.1	99.1	1	225	227	9.96e-152	420	1080
117	AT1G02190.1	AL1G10020.t1	0.0534813	0.127894	0.41817	NG	79.7	514	645	50	6	81	528	81.9	1	628	628	100	100	1	581	581	0	988	2553
118	AT1G02205.2	AL1G10010.t1	0.0178115	0.0828731	0.214925	NG	96.5	412	427	15	0	0	420	98.4	1	427	626	68.2	68.2	1	427	427	8.76e-305	848	2190
119	AT1G02210.1	AL1G11550.t2	0.25257	0.811426	0.311267	NG	82	50	61	11	0	0	54	88.5	20	80	88	69.3	69.3	28	88	152	7.14e-31	105	263
120	AT1G02220.1	AL1G11560.t1	0.0937476	0.168063	0.557812	NG	74.4	299	402	72	6	31	326	81.1	1	395	395	100	100	1	378	378	1.16e-195	545	1403
121	AT1G02230.1	AL1G11570.t1	0.0848485	0.142549	0.595223	NG	80.7	293	363	65	4	5	321	88.4	1	360	360	100	100	1	361	361	4.82e-198	548	1413
122	AT1G02260.1	AL1G11590.t1	0.0257947	0.220344	0.117066	NG	93.5	473	506	24	5	9	486	96	1	503	503	100	100	1	500	500	0	869	2246
123	AT1G02270.1	AL1G11600.t1	0.020118	0.139322	0.1444	NG	95.9	465	485	20	0	0	476	98.1	1	485	485	100	100	1	485	485	0	952	2460
124	AT1G02280.1	AL1G11610.t1	0.00660563	0.117575	0.0561823	NG	98.7	294	298	4	0	0	295	99	1	298	298	100	100	1	298	298	4.16e-209	571	1472
125	AT1G02290.1	AL1G11620.t1	0.0608005	0.102762	0.591663	NG	84.4	384	455	59	3	12	409	89.9	1	444	444	100	100	1	454	454	3.01e-278	759	1959
126	AT1G02300.1	AL1G11630.t1	0.0449561	0.151349	0.297036	NG	86.8	328	378	30	1	20	335	88.6	1	378	380	99.5	99.5	1	358	360	1.88e-246	672	1733
127	AT1G02305.1	AL1G11640.t1	0.0096367	0.105207	0.0915975	NG	97.2	353	363	8	2	2	357	98.3	1	363	363	100	100	1	361	361	1.26e-274	742	1916
128	AT1G02310.1	AL1G11650.t1	0.0234333	0.16077	0.145757	NG	94.4	389	412	22	1	1	399	96.8	1	412	412	100	100	1	411	411	1.31e-292	792	2045
129	AT1G02330.1	AL1G11660.t1	0.00616302	0.175104	0.0351963	NG	97.9	274	280	4	2	2	275	98.2	1	280	280	100	100	1	278	278	8.3e-163	452	1164
130	AT1G02335.1	AL1G11670.t1	0.014367	0.229109	0.062708	NG	96.4	212	220	7	1	1	212	96.4	1	220	220	100	100	1	219	219	2.87e-145	403	1036
131	AT1G02340.2	AL1G11680.t1	0.130432	0.337545	0.386414	NG	73.1	212	290	64	9	14	232	80	1	286	286	100	100	1	280	280	4.19e-130	370	950
132	AT1G02370.1	AL1G11720.t1	0.0284813	0.170585	0.166962	NG	91.3	491	538	34	1	13	502	93.3	1	538	538	100	100	1	525	525	0	941	2431
133	AT1G02380.1	AL1G11730.t1	0.0441398	0.132491	0.333153	NG	82.8	192	232	40	0	0	195	84.1	1	232	232	100	100	1	232	232	4.16e-93	272	696
134	AT1G02390.1	AL1G11740.t1	0.0329337	0.161579	0.203824	NG	92.3	490	531	36	3	5	507	95.5	1	531	531	100	100	1	526	526	0	966	2498
135	AT1G02400.1	AL1G11750.t1	0.0227237	0.0787183	0.288671	NG	95.5	315	330	15	0	0	320	97	1	330	330	100	100	1	330	330	3.14e-236	642	1657
136	AT1G02405.1	AL1G11760.t1	0.0847303	0.166593	0.508607	NG	73	100	137	26	4	11	108	78.8	1	135	135	100	100	1	128	128	4.55e-27	97.4	241
137	AT1G02410.1	AL1G11770.t1	0.0167593	0.0579376	0.289264	NG	96.5	276	286	10	0	0	280	97.9	1	286	288	99.3	99.3	1	286	288	1.62e-201	551	1420
138	AT1G02420.1	AL1G11782.t1	0.0157568	0.127486	0.123596	NG	91	447	491	44	0	0	448	91.2	2	492	492	99.8	99.8	1	491	491	3.72e-216	605	1560
139	AT1G02430.1	AL1G11784.t1	0.0572356	0.0798603	0.716696	NG	88	168	191	23	0	0	179	93.7	1	191	191	100	100	1	191	191	2.51e-125	350	899
140	AT1G02450.1	AL1G11790.t1	0.033495	0.169016	0.198176	NG	80.5	103	128	20	1	5	109	85.2	16	143	143	89.5	89.5	1	123	123	4.99e-35	117	294
141	AT1G02460.1	AL1G11800.t1	0.0142877	0.120082	0.118983	NG	95.5	470	492	22	0	0	478	97.2	1	492	492	100	100	1	492	492	0	895	2314
142	AT1G02470.1	AL1G11810.t1	0.0284278	0.101415	0.280311	NG	92	208	226	13	1	5	213	94.2	1	221	221	100	100	1	226	226	8.23e-124	349	896
143	AT1G02475.1	AL1G11820.t1	0.0183858	0.11577	0.158813	NG	95.9	211	220	8	1	1	214	97.3	1	220	220	100	100	1	219	219	1.01e-154	427	1098
144	AT1G02510.1	AL1G11850.t1	0.0234286	0.10066	0.232749	NG	94.1	271	288	14	1	3	277	96.2	1	285	285	100	100	1	288	288	3.25e-182	502	1293
145	AT1G02520.1	AL1G11860.t1	0.0160598	0.241142	0.0665988	NG	94.1	1212	1288	45	4	31	1235	95.9	1	1279	1279	100	100	1	1266	1266	0	2230	5778
146	AT1G02550.1	AL1G11880.t1	0.0277929	0.136544	0.203545	NG	93	226	243	17	0	0	230	94.7	1	243	243	100	100	1	243	243	1.37e-150	419	1076
147	AT1G02560.1	AL1G11890.t1	0.00293851	0.0795255	0.0369505	NG	99.3	297	299	2	0	0	297	99.3	1	299	299	100	100	1	299	299	1.31e-217	593	1528
148	AT1G02570.1	AL1G11900.t1	0.0432739	0.208982	0.207069	NG	90.7	253	279	26	0	0	265	95	1	279	279	100	100	1	279	279	1.96e-177	489	1260
149	AT1G02580.2	AL1G14210.t1	0.120382	0.379141	0.317512	NG	73.6	134	182	26	3	22	148	81.3	148	329	585	31.1	31.1	1	160	188	1.55e-73	233	593
150	AT1G02610.1	AL1G11930.t1	0.0266814	0.0838396	0.318243	NG	94.1	209	222	12	1	1	213	95.9	1	222	222	100	100	1	221	221	1.03e-139	389	1000
151	AT1G02630.1	AL1G11970.t1	0.0130058	0.141614	0.0918404	NG	97.2	379	390	11	0	0	386	99	1	390	390	100	100	1	390	390	1.74e-277	752	1941
152	AT1G02640.1	AL1G11980.t1	0.00980144	0.128669	0.0761757	NG	97.9	753	769	16	0	0	763	99.2	1	769	769	100	100	1	769	769	0	1538	3981
153	AT1G02650.1	AL1G11990.t1	0.0353397	0.0881445	0.400929	NG	87.5	450	514	37	3	27	465	90.5	1	514	514	100	100	1	487	487	2.11e-305	842	2175
154	AT1G02660.1	AL1G12000.t1	0.0248901	0.153829	0.161804	NG	93.7	674	719	37	3	8	688	95.7	1	714	714	100	100	1	716	716	0	1244	3219
155	AT1G02680.1	AL1G12010.t1	0.00705269	0.115487	0.0610691	NG	92.1	117	127	7	1	3	118	92.9	1	127	127	100	100	1	124	124	9.15e-76	220	560
156	AT1G02690.1	AL1G12060.t1	0.0334278	0.134921	0.247758	NG	90.9	491	540	42	2	7	506	93.7	1	539	539	100	100	1	534	534	9.65e-249	691	1784
157	AT1G02700.1	AL1G12070.t1	0.0107184	0.199195	0.0538087	NG	96.8	242	250	6	1	2	244	97.6	1	248	248	100	100	2	251	251	2.72e-167	461	1187
158	AT1G02705.1	AL1G12080.t1	0.0361207	0.194153	0.186043	NG	93.7	133	142	7	1	2	136	95.8	1	140	142	98.6	98.6	1	142	156	6.76e-42	136	342
159	AT1G02720.1	AL1G12090.t1	0.00967038	0.0889416	0.108727	NG	98.1	355	362	7	0	0	360	99.4	1	362	362	100	100	1	362	362	2.84e-271	734	1894
160	AT1G02730.1	AL1G12110.t1	0.00924579	0.142002	0.0651105	NG	97.7	1159	1186	22	3	5	1171	98.7	1	1182	1182	100	100	1	1185	1185	0	2333	6045
161	AT1G02740.1	AL1G12120.t1	0.0210096	0.113583	0.184971	NG	95.1	312	328	16	0	0	318	97	1	328	328	100	100	1	328	328	7.92e-229	624	1608
162	AT1G02750.1	AL1G12130.t1	0.0514932	0.112016	0.459694	NG	88.6	194	219	23	2	2	198	90.4	1	218	222	98.2	98.2	1	218	221	6.06e-132	370	949
163	AT1G02770.1	AL1G49380.t1	0.322431	0.461803	0.6982	NG	52.2	142	272	113	9	17	176	64.7	20	280	317	82.3	82.3	8	273	276	2.31e-74	229	585
164	AT1G02790.1	AL1G12160.t1	0.0103563	0.0903448	0.11463	NG	98.1	415	423	8	0	0	420	99.3	1	423	423	100	100	1	423	423	5.53e-305	834	2155
165	AT1G02800.1	AL1G12170.t1	0.0140952	0.118011	0.11944	NG	96.8	486	502	16	0	0	493	98.2	1	502	502	100	100	1	502	502	0	985	2546
166	AT1G02810.1	AL1G12180.t1	0.0155595	0.218396	0.0712444	NG	87.9	510	580	19	1	51	516	89	1	580	580	100	100	1	529	529	0	984	2544
167	AT1G02813.1	AL1G12190.t1	0.0360592	0.0899733	0.400776	NG	93.9	139	148	9	0	0	144	97.3	1	148	150	98.7	98.7	1	148	150	4.51e-99	281	718
168	AT1G02816.1	AL1G12200.t1	0.0292295	0.133746	0.218545	NG	97.1	134	138	4	0	0	136	98.6	30	167	167	82.6	82.6	36	173	173	5.41e-96	275	702
169	AT1G02820.1	AL1G12210.t1	0.03234	0.137527	0.235155	NG	87.8	86	98	6	1	6	88	89.8	1	92	92	100	100	1	98	98	1.62e-50	154	388
170	AT1G02840.1	AL1G12240.t4	0.0132532	0.158559	0.0835853	NG	91.8	290	316	14	2	12	292	92.4	1	304	304	100	100	1	316	316	3.15e-138	393	1009
171	AT1G02850.2	AL1G12260.t1	0.0633074	0.13325	0.475101	NG	79.4	432	544	52	4	60	450	82.7	1	493	498	99	99	1	535	558	6.8e-305	845	2184
172	AT1G02860.1	AL1G12270.t1	0.0122196	0.100372	0.121744	NG	97	326	336	9	1	1	332	98.8	1	336	336	100	100	1	335	335	1.71e-245	666	1719
173	AT1G02870.1	AL1G12280.t1	0.0158011	0.123932	0.127497	NG	96.4	187	194	7	0	0	191	98.5	1	194	194	100	100	1	194	194	1.07e-132	369	948
174	AT1G02880.3	AL1G12300.t1	0.0309491	0.0994879	0.311084	NG	91.9	248	270	20	1	2	261	96.7	1	268	268	100	100	1	270	270	4.21e-183	503	1295
175	AT1G02890.1	AL6G50580.t1	0.106765	0.598901	0.178268	NG	77.6	986	1271	255	9	30	1098	86.4	1	1247	1247	100	100	1	1265	1265	0	1838	4761
176	AT1G02900.1	AL1G12340.t1	0.0604324	0.0878581	0.687841	NG	87.6	106	121	15	0	0	114	94.2	1	121	121	100	100	1	121	121	6.24e-74	215	547
177	AT1G02910.1	AL1G12350.t2	0.0194372	0.0980527	0.198232	NG	95.2	432	454	22	0	0	440	96.9	1	454	454	100	100	1	454	454	1.6e-305	841	2172
178	AT1G02920.1	AL1G12360.t1	0.0146149	0.120845	0.120939	NG	97.1	204	210	6	0	0	205	97.6	1	210	210	100	100	1	210	210	4.14e-147	407	1046
179	AT1G02930.1	AL1G12370.t1	0.0083473	0.15584	0.0535632	NG	98.1	205	209	4	0	0	207	99	1	209	209	100	100	1	209	209	1.39e-149	413	1062
180	AT1G02940.2	AL1G12380.t1	0.0477099	0.129472	0.368496	NG	87.6	247	282	27	1	8	256	90.8	1	282	282	100	100	1	274	274	1.84e-177	489	1260
181	AT1G02950.1	AL1G12390.t2	0.0187219	0.0958625	0.1953	NG	95.9	234	244	10	0	0	237	97.1	1	244	244	100	100	1	244	244	2.89e-173	476	1225
182	AT1G02950.2	AL1G12390.t1	0.0185903	0.0945921	0.196531	NG	95.9	236	246	10	0	0	239	97.2	1	246	246	100	100	1	246	246	4.1e-174	478	1231
183	AT1G02960.2	AL1G12400.t1	0.0543121	0.123545	0.439615	NG	87.3	414	474	55	2	5	441	93	1	472	472	100	100	1	471	471	9.38e-282	769	1987
184	AT1G02970.1	AL1G12410.t1	0.0156444	0.134583	0.116243	NG	96.4	375	389	14	0	0	385	99	113	501	501	77.6	77.6	1	389	389	4.98e-278	758	1957
185	AT1G02980.1	AL1G12430.t1	0.0949775	0.156438	0.607125	NG	82.1	610	743	130	2	3	672	90.4	1	743	743	100	100	1	740	740	0	1213	3139
186	AT1G02990.3	AL1G12440.t1	0.0331053	0.0839423	0.394382	NG	92.3	1052	1140	79	2	9	1078	94.6	1	1131	1279	88.4	88.4	1	1140	1147	0	1948	5046
187	AT1G03000.1	AL1G12450.t1	0.026241	0.102779	0.255315	NG	94	892	949	49	3	8	915	96.4	1	942	942	100	100	1	948	948	0	1704	4412
188	AT1G03010.1	AL1G12460.t2	0.0125604	0.13167	0.0953929	NG	94.8	618	652	17	1	17	627	96.2	1	635	635	100	100	1	652	652	0	1146	2965
189	AT1G03020.1	AL1G12470.t1	0.013039	0.132864	0.0981381	NG	97.1	100	103	3	0	0	101	98.1	1	103	103	100	100	1	103	103	4.97e-67	196	498
190	AT1G03030.1	AL1G12480.t1	0.0103782	0.148724	0.0697816	NG	97.8	227	232	5	0	0	230	99.1	71	302	302	76.8	76.8	1	232	232	2.12e-169	468	1205
191	AT1G03040.1	AL1G12490.t1	0.0125008	0.142898	0.0874804	NG	91	282	310	18	3	10	285	91.9	1	303	303	100	100	1	307	307	8.66e-194	533	1373
192	AT1G03050.1	AL1G12500.t1	0.0166262	0.119519	0.139109	NG	96.8	581	600	19	0	0	591	98.5	1	600	600	100	100	1	600	600	0	1052	2721
193	AT1G03055.1	AL1G12510.t1	0.0146708	0.153874	0.095343	NG	96.6	256	265	9	0	0	260	98.1	1	265	265	100	100	1	265	265	3.1e-183	503	1295
194	AT1G03060.1	AL6G50380.t2	0.0950011	0.517771	0.183481	NG	81.1	2928	3609	614	19	67	3215	89.1	1	3582	3602	99.4	99.4	2	3570	3573	0	5618	14574
195	AT1G03070.1	AL1G12530.t1	0.00538514	0.182629	0.0294868	NG	98.4	244	248	3	1	1	245	98.8	1	248	248	100	100	1	247	247	2.74e-166	459	1180
196	AT1G03080.1	AL1G12540.t1	0.0192568	0.079326	0.242755	NG	93.7	1627	1737	107	1	3	1661	95.6	1	1734	1734	100	100	1	1737	1737	0	2739	7101
197	AT1G03090.1	AL1G12550.t1	0.0175253	0.0976989	0.179381	NG	93	688	740	27	2	25	706	95.4	1	715	715	100	100	1	740	740	0	1358	3515
198	AT1G03100.1	AL1G12560.t1	0.0278411	0.146042	0.190638	NG	93.2	740	794	54	0	0	765	96.3	1	794	794	100	100	1	794	794	0	1352	3499
199	AT1G03103.1	AL1G12570.t1	0.076388	0.105432	0.724525	NG	72.9	124	170	34	2	12	128	75.3	1	169	172	98.3	98.3	1	159	162	2.57e-65	197	500
200	AT1G03110.1	AL1G12580.t1	0.0197378	0.106313	0.185657	NG	96	409	426	16	1	1	416	97.7	1	426	428	99.5	99.5	1	425	427	2.95e-288	782	2020
201	AT1G03120.2	AL1G12590.t1	0.249274	0.308547	0.807898	NG	89	97	109	11	1	1	100	91.7	1	108	136	79.4	79.4	1	109	138	1.97e-57	174	442
202	AT1G03130.1	AL1G12600.t1	0.00652441	0.107183	0.0608714	NG	98.1	202	206	3	1	1	203	98.5	1	205	205	100	100	1	206	206	1.5e-140	390	1002
203	AT1G03140.1	AL1G12610.t1	0.00931468	0.124588	0.0747639	NG	86.5	364	421	54	1	3	369	87.6	1	421	421	100	100	1	418	418	2.39e-230	635	1638
204	AT1G03150.1	AL1G12620.t1	NA	0.101129	0	NG	100	175	175	0	0	0	175	100	1	175	175	100	100	1	175	175	6.37e-127	353	906
205	AT1G03160.1	AL1G12650.t1	0.0215788	0.122674	0.175904	NG	93.5	869	929	39	5	21	889	95.7	1	913	913	100	100	1	924	924	0	1617	4186
206	AT1G03170.1	AL1G12660.t1	0.0438051	0.128004	0.342218	NG	86.6	213	246	26	3	7	221	89.8	1	240	241	99.6	99.6	1	245	248	5.73e-139	389	1000
207	AT1G03180.1	AL1G12670.t1	0.0284094	0.0736994	0.385476	NG	94	250	266	16	0	0	256	96.2	1	266	266	100	100	1	266	266	1.78e-178	491	1264
208	AT1G03190.1	AL1G12680.t1	0.00518622	0.0749701	0.0691771	NG	98.8	750	759	9	0	0	755	99.5	1	759	759	100	100	1	759	759	0	1498	3878
209	AT1G03220.1	AL1G12730.t1	0.0202927	0.170244	0.119198	NG	95.9	416	434	18	0	0	423	97.5	1	434	434	100	100	1	434	434	4.28e-298	808	2086
210	AT1G03250.1	AL1G12740.t1	0.0168791	0.149681	0.112767	NG	96.3	237	246	9	0	0	241	98	1	246	246	100	100	1	246	246	1.17e-173	477	1228
211	AT1G03260.1	AL1G12750.t1	0.0066124	0.0838013	0.0789057	NG	98.5	271	275	4	0	0	273	99.3	1	275	275	100	100	1	275	275	2.34e-183	504	1298
212	AT1G03270.1	AL1G12760.t1	0.00795161	0.110822	0.0717512	NG	98.4	492	500	8	0	0	496	99.2	1	500	500	100	100	1	500	500	0	876	2264
213	AT1G03280.1	AL1G12780.t1	0.0202496	0.113689	0.178113	NG	96	410	427	17	0	0	413	96.7	1	427	480	89	89	1	427	481	1.17e-291	795	2054
214	AT1G03290.1	AL1G12800.t1	0.0479364	0.115201	0.416109	NG	88.9	510	574	62	1	2	529	92.2	1	572	572	100	100	1	574	574	0	942	2435
215	AT1G03300.1	AL1G12810.t1	0.0975127	0.172973	0.563745	NG	72.7	498	685	135	10	52	528	77.1	3	665	671	98.8	98.8	5	659	669	1.42e-305	879	2272
216	AT1G03310.1	AL1G12820.t1	0.0281319	0.133995	0.209947	NG	93.6	779	832	52	1	1	811	97.5	53	883	883	94.1	94.1	1	832	832	0	1588	4112
217	AT1G03320.1	AL1G12830.t1	0.0977613	0.093677	1.0436	NG	54.3	134	247	46	6	67	146	59.1	1	217	221	98.2	98.2	1	210	214	3.35e-73	221	562
218	AT1G03330.1	AL1G12840.t1	NA	0.101255	0	NG	100	94	94	0	0	0	94	100	1	94	94	100	100	1	94	94	3.52e-65	191	484
219	AT1G03340.1	AL1G12850.t1	0.0470214	0.108023	0.435289	NG	86.5	347	401	38	3	16	362	90.3	1	386	386	100	100	1	400	400	1.33e-232	639	1647
220	AT1G03350.1	AL1G12870.t1	0.0435192	0.133556	0.325851	NG	85.1	401	471	52	2	18	416	88.3	1	471	471	100	100	1	453	453	6.67e-240	663	1710
221	AT1G03360.1	AL1G12880.t1	0.0108302	0.127352	0.0850417	NG	97.5	315	323	8	0	0	319	98.8	1	323	323	100	100	1	323	323	1.11e-221	605	1560
222	AT1G03365.1	AL1G12890.t1	0.0308469	0.0939871	0.328203	NG	92	767	834	55	1	12	795	95.3	3	824	824	99.8	99.8	1	834	834	0	1394	3609
223	AT1G03370.1	AL1G12900.t1	0.0128203	0.14106	0.0908856	NG	97	984	1014	30	0	0	998	98.4	1	1014	1021	99.3	99.3	1	1014	1024	0	1926	4989
224	AT1G03380.1	AL1G12910.t1	0.0223415	0.0999888	0.223441	NG	94.9	912	961	46	2	3	930	96.8	1	960	960	100	100	1	959	959	0	1779	4608
225	AT1G03390.1	AL1G12920.t1	0.0239606	0.158008	0.151642	NG	94.6	438	463	24	1	1	448	96.8	1	462	462	100	100	1	463	463	0	904	2337
226	AT1G03430.1	AL1G12930.t1	0.0177425	0.173054	0.102525	NG	96.8	153	158	5	0	0	155	98.1	1	158	158	100	100	1	158	158	4.1e-108	304	779
227	AT1G03440.1	AL1G12940.t1	0.0204463	0.191688	0.106665	NG	96	381	397	16	0	0	388	97.7	2	398	398	99.7	99.7	1	397	397	3.53e-214	592	1527
228	AT1G03445.1	AL1G12950.t1	0.0522201	0.111427	0.468649	NG	85.7	695	811	93	4	23	735	90.6	7	794	794	99.2	99.2	9	819	819	0	1397	3617
229	AT1G03457.1	AL1G12960.t1	0.0260069	0.138768	0.187413	NG	94	404	430	23	1	3	410	95.3	1	430	430	100	100	1	427	427	4.44e-295	800	2065
230	AT1G03470.1	AL1G12970.t1	0.0430494	0.150286	0.28645	NG	85.9	232	270	30	3	8	238	88.1	1	270	270	100	100	1	262	262	2.05e-152	425	1093
231	AT1G03475.1	AL1G12980.t1	0.00509677	0.147802	0.0344838	NG	98.7	383	388	4	1	1	383	98.7	1	387	387	100	100	1	388	388	3.71e-289	781	2017
232	AT1G03490.1	AL1G13550.t1	0.218575	0.428982	0.509519	NG	56.7	118	208	45	4	45	127	61.1	1	166	282	58.9	58.9	1	205	216	6.06e-67	207	527
233	AT1G03510.1	AL1G13010.t1	0.0250715	0.176799	0.141807	NG	94.7	372	393	21	0	0	386	98.2	38	430	430	91.4	91.4	1	393	393	2.04e-278	756	1952
234	AT1G03520.1	AL1G13030.t1	0.0204909	0.166061	0.123394	NG	95.8	429	448	19	0	0	442	98.7	1	448	448	100	100	1	448	448	0	877	2266
235	AT1G03530.1	AL1G13040.t1	0.042721	0.111765	0.382239	NG	83.3	684	821	102	8	35	700	85.3	1	802	802	100	100	1	805	805	0	949	2452
236	AT1G03540.1	AL1G13050.t1	0.0286853	0.183667	0.156181	NG	89	543	610	66	1	1	556	91.1	1	610	610	100	100	1	609	609	0	1077	2786
237	AT1G03550.1	AL1G13060.t1	0.00619509	0.0955402	0.0648428	NG	94	267	284	17	0	0	270	95.1	1	284	284	100	100	1	284	284	1.22e-178	493	1269
238	AT1G03560.1	AL1G13070.t1	0.0183014	0.159579	0.114686	NG	97.6	644	660	16	0	0	648	98.2	1	660	661	99.8	99.8	1	660	712	3.81e-212	610	1573
239	AT1G03590.1	AL1G13090.t1	0.013275	0.116131	0.11431	NG	97	446	460	14	0	0	451	98	1	460	463	99.4	99.4	1	460	461	0	890	2299
240	AT1G03600.1	AL1G13100.t1	0.0104726	0.101155	0.10353	NG	96.6	169	175	6	0	0	170	97.1	1	175	175	100	100	1	175	175	1.87e-110	311	798
241	AT1G03610.1	AL1G13110.t1	0.00975276	0.0894646	0.109013	NG	97.7	302	309	7	0	0	306	99	1	309	309	100	100	1	309	309	5.4e-231	627	1618
242	AT1G03620.1	AL1G13120.t1	0.00815584	0.0890708	0.0915658	NG	98.1	261	266	5	0	0	266	100	1	266	266	100	100	1	266	266	3.03e-195	533	1374
243	AT1G03620.12	AL1G13120.t2	0.0160142	0.0747616	0.214204	NG	96.3	287	298	11	0	0	295	99	1	298	298	100	100	1	298	298	4.04e-216	589	1518
244	AT1G03630.1	AL1G13130.t1	0.00658383	0.193216	0.034075	NG	98.5	396	402	6	0	0	401	99.8	1	402	402	100	100	1	402	402	5.04e-283	767	1980
245	AT1G03650.1	AL1G13150.t1	0.0397727	0.191186	0.208031	NG	91.2	145	159	14	0	0	153	96.2	1	159	159	100	100	1	159	159	2.26e-101	287	735
246	AT1G03680.1	AL1G13170.t2	0.0431696	0.179173	0.240939	NG	88.7	165	186	15	1	6	174	93.5	1	180	180	100	100	1	186	186	5.19e-114	321	823
247	AT1G03687.1	AL1G13180.t1	0.0362587	0.112874	0.321232	NG	92.4	353	382	29	0	0	366	95.8	1	382	382	100	100	1	382	382	1.3e-268	729	1881
248	AT1G03700.1	AL1G13190.t1	NA	0.183205	0	NG	100	165	165	0	0	0	165	100	1	165	165	100	100	1	165	165	2.23e-104	295	756
249	AT1G03710.1	AL1G13240.t1	0.0704842	0.148114	0.475877	NG	83.2	173	208	24	4	11	184	88.5	1	200	203	98.5	98.5	1	205	206	2.02e-117	332	850
250	AT1G03720.2	AL1G13260.t1	0.198509	0.311032	0.638229	NG	70.2	177	252	63	3	12	192	76.2	24	263	267	89.9	89.9	13	264	266	1.71e-116	334	857
251	AT1G03730.1	AL1G13270.t1	NA	0.0571854	0	NG	98.2	168	171	0	1	3	168	98.2	1	168	168	100	100	1	171	171	6.8e-108	305	780
252	AT1G03740.1	AL1G13280.t1	0.0326619	0.135796	0.240521	NG	93.5	689	737	48	0	0	703	95.4	1	737	741	99.5	99.5	1	737	749	0	1345	3481
253	AT1G03750.1	AL1G13300.t1	0.0191182	0.127866	0.149517	NG	94.7	818	864	38	3	8	835	96.6	1	857	863	99.3	99.3	1	863	877	0	1555	4025
254	AT1G03760.1	AL1G13310.t1	0.0684969	0.187168	0.365965	NG	75	318	424	73	6	33	339	80	1	392	392	100	100	1	423	423	2.62e-202	563	1451
255	AT1G03770.1	AL1G13320.t2	0.0496441	0.0961765	0.516177	NG	84.1	391	465	70	1	4	410	88.2	1	461	461	100	100	1	465	465	6.41e-217	605	1559
256	AT1G03780.2	AL1G13330.t1	0.0314103	0.11211	0.280175	NG	90.3	697	772	62	4	13	713	92.4	1	759	759	100	100	1	772	772	0	1254	3245
257	AT1G03790.1	AL1G13350.t1	0.0154661	0.162679	0.0950712	NG	89.4	347	388	38	1	3	352	90.7	10	394	394	97.7	97.7	1	388	388	6.58e-246	672	1734
258	AT1G03800.1	AL1G13360.t1	0.117381	0.205096	0.572319	NG	82.4	154	187	33	0	0	163	87.2	60	246	246	76	76	29	215	215	2.77e-81	242	618
259	AT1G03810.1	AL1G13370.t1	0.0561656	0.279588	0.200887	NG	89.4	127	142	14	1	1	134	94.4	1	142	144	98.6	98.6	1	141	145	1.35e-86	249	635
260	AT1G03820.1	AL1G13380.t1	0.0356998	0.199733	0.178737	NG	82.1	184	224	37	2	3	191	85.3	1	223	223	100	100	1	222	222	7.83e-117	332	850
261	AT1G03830.1	AL1G13390.t1	0.0432839	0.102595	0.421891	NG	87.7	889	1014	102	2	23	943	93	1	992	992	100	100	1	1013	1013	0	1652	4277
262	AT1G03840.1	AL1G13400.t1	0.0271626	0.181645	0.149537	NG	90.9	467	514	36	5	11	476	92.6	1	507	507	100	100	1	510	510	1.88e-305	843	2177
263	AT1G03850.2	AL1G13430.t1	0.0267479	0.0494467	0.540944	NG	92.8	141	152	9	2	2	145	95.4	1	151	151	100	100	1	151	151	9.41e-97	275	703
264	AT1G03860.1	AL1G13440.t1	0.006155	0.132772	0.0463577	NG	98.6	280	284	4	0	0	283	99.6	1	284	287	99	99	1	284	289	1.59e-192	528	1361
265	AT1G03870.1	AL1G13450.t1	0.0210869	0.136792	0.154153	NG	89.9	223	248	25	0	0	230	92.7	1	248	248	100	100	1	248	248	8.16e-150	417	1072
266	AT1G03880.1	AL1G13460.t1	0.0158711	0.141366	0.11227	NG	96.7	441	456	15	0	0	449	98.5	1	456	456	100	100	1	456	456	0	903	2333
267	AT1G03890.1	AL1G13470.t1	0.0240614	0.178222	0.135008	NG	93.8	425	453	27	1	1	435	96	1	452	452	100	100	1	453	453	1.05e-305	846	2186
268	AT1G03900.1	AL1G13480.t1	0.00652723	0.12449	0.0524319	NG	96.8	269	278	4	1	5	272	97.8	1	273	273	100	100	1	278	278	6.01e-193	528	1361
269	AT1G03905.1	AL1G13490.t1	0.00451117	0.117062	0.0385367	NG	99	288	291	3	0	0	291	100	1	291	291	100	100	191	481	481	1.79e-208	577	1486
270	AT1G03910.2	AL1G13510.t1	0.0164299	0.140531	0.116913	NG	90.3	648	718	23	3	47	656	91.4	1	717	717	100	100	1	672	672	0	1085	2807
271	AT1G03920.1	AL1G13520.t1	0.0166916	0.115307	0.144757	NG	95.4	545	571	25	1	1	557	97.5	1	570	570	100	100	1	571	571	0	1086	2808
272	AT1G03940.1	AL1G13540.t1	0.0321345	0.203718	0.15774	NG	87.4	410	469	31	1	28	424	90.4	2	470	470	99.8	99.8	1	441	441	5.18e-301	817	2110
273	AT1G03950.1	AL1G13560.t1	0.00821416	0.115288	0.0712487	NG	98.6	208	211	3	0	0	209	99.1	1	211	211	100	100	1	211	211	7.51e-107	305	782
274	AT1G03960.1	AL1G13570.t2	0.026271	0.143535	0.183028	NG	89.1	499	560	30	3	31	512	91.4	1	530	530	100	100	1	559	559	0	983	2542
275	AT1G03970.1	AL1G13580.t1	0.0191924	0.188832	0.101638	NG	92.4	257	278	13	4	8	260	93.5	1	271	271	100	100	1	277	277	2.18e-160	446	1147
276	AT1G03980.3	AL1G13592.t1	0.0213781	0.132331	0.16155	NG	87.9	400	455	14	3	41	402	88.4	1	453	453	100	100	1	416	416	2.19e-280	763	1970
277	AT1G03982.1	AL1G13594.t1	0.165589	0.207524	0.797926	NG	79.3	73	92	11	1	8	74	80.4	8	99	178	51.7	51.7	16	99	171	1.47e-43	142	358
278	AT1G03990.1	AL1G13600.t1	0.0330335	0.136264	0.242423	NG	92.8	706	761	53	2	2	732	96.2	1	759	759	100	100	1	761	761	0	1397	3617
279	AT1G04000.1	AL1G13610.t1	0.0773399	0.08205	0.942596	NG	79.8	130	163	23	2	10	136	83.4	1	153	153	100	100	1	163	163	9.31e-82	238	606
280	AT1G04010.1	AL1G13620.t1	0.00880236	0.0929655	0.0946841	NG	98.2	532	542	10	0	0	537	99.1	93	634	634	85.5	85.5	1	542	542	0	1133	2930
281	AT1G04020.1	AL1G13630.t1	0.0383179	0.155469	0.246467	NG	90.8	644	709	58	2	7	668	94.2	7	714	714	99.2	99.2	1	703	703	0	1270	3286
282	AT1G04030.1	AL1G13640.t1	0.0390861	0.109766	0.356086	NG	85.6	376	439	55	3	8	395	90	1	435	435	100	100	1	435	435	1.21e-233	645	1663
283	AT1G04040.1	AL1G13650.t1	0.025499	0.13093	0.194752	NG	94.1	256	272	16	0	0	266	97.8	1	272	272	100	100	1	272	272	5.87e-196	536	1380
284	AT1G04050.1	AL1G13660.t1	0.0669312	0.132947	0.503442	NG	79.9	598	748	127	6	23	629	84.1	1	735	735	100	100	1	738	738	0	1122	2902
285	AT1G04070.1	AL1G13670.t1	0.0838993	0.0775907	1.08131	NG	84.9	79	93	14	0	0	85	91.4	1	93	95	97.9	97.9	1	93	95	7.11e-52	157	397
286	AT1G04080.3	AL1G13680.t1	0.0261744	0.116086	0.225474	NG	87.6	722	824	45	2	57	742	90	1	824	824	100	100	1	767	767	0	1295	3350
287	AT1G04090.1	AL1G13690.t1	0.0253365	0.11879	0.213289	NG	94.6	540	571	31	0	0	556	97.4	1	571	573	99.7	99.7	1	571	573	0	1142	2954
288	AT1G04100.1	AL1G13700.t1	0.0560872	0.168807	0.332257	NG	85.2	225	264	35	2	4	232	87.9	1	260	262	99.2	99.2	1	264	266	5.53e-142	399	1024
289	AT1G04110.1	AL1G13710.t1	0.0120848	0.104666	0.115461	NG	96.8	754	779	22	1	3	766	98.3	1	776	776	100	100	1	779	779	0	1496	3874
290	AT1G04120.1	AL1G13720.t2	0.0100472	0.118019	0.0851319	NG	97.5	1483	1521	32	1	6	1500	98.6	1	1515	1515	100	100	1	1521	1521	0	2846	7379
291	AT1G04130.1	AL1G13730.t1	0.0186936	0.109506	0.170708	NG	95.8	346	361	15	0	0	353	97.8	1	361	361	100	100	1	361	361	4.05e-250	680	1755
292	AT1G04170.1	AL1G13770.t1	0.00189381	0.139594	0.0135665	NG	99.6	464	466	2	0	0	466	100	1	466	466	100	100	1	466	466	0	913	2360
293	AT1G04180.1	AL1G13780.t1	0.00935731	0.161974	0.0577705	NG	98.1	414	422	8	0	0	416	98.6	1	422	422	100	100	1	422	422	8.84e-305	836	2160
294	AT1G04190.1	AL1G13790.t1	0.0157223	0.122269	0.128588	NG	97.3	320	329	9	0	0	321	97.6	1	329	329	100	100	2	330	330	4.42e-190	526	1354
295	AT1G04200.1	AL1G13800.t1	0.0194273	0.153278	0.126745	NG	95.5	700	733	33	0	0	710	96.9	1	733	733	100	100	1	733	733	0	1336	3458
296	AT1G04210.1	AL1G13810.t2	0.0212278	0.114072	0.186091	NG	91.6	1040	1135	73	3	22	1058	93.2	1	1113	1113	100	100	1	1135	1135	0	1867	4835
297	AT1G04220.1	AL1G13820.t1	0.0100596	0.168489	0.0597048	NG	97.2	514	529	11	2	4	521	98.5	1	529	529	100	100	1	525	525	0	1005	2598
298	AT1G04230.1	AL1G13830.t1	0.0201221	0.0766812	0.262412	NG	95.9	281	293	12	0	0	287	98	1	293	326	89.9	89.9	1	293	326	6.23e-186	515	1326
299	AT1G04240.1	AL1G13840.t1	0.0238819	0.10226	0.233541	NG	84.3	161	191	29	1	1	163	85.3	1	190	190	100	100	1	191	191	8.86e-112	316	810
300	AT1G04260.1	AL1G13860.t1	0.00513939	0.175613	0.0292654	NG	96.2	176	183	2	1	5	177	96.7	1	183	183	100	100	1	178	178	1.33e-115	325	833
301	AT1G04270.1	AL1G13870.t1	0.00575821	0.189815	0.0303358	NG	98.7	151	153	2	0	0	153	100	1	153	153	100	100	1	153	153	3.84e-106	299	765
302	AT1G04280.1	AL1G13880.t1	0.0255902	0.212637	0.120347	NG	95	457	481	23	1	1	469	97.5	55	535	535	89.9	89.9	1	480	480	0	899	2322
303	AT1G04290.1	AL1G13890.t1	0.0247186	0.147959	0.167064	NG	94.9	148	156	8	0	0	150	96.2	1	156	156	100	100	1	156	156	2.11e-100	285	728
304	AT1G04300.3	AL8G16740.t1	0.204283	0.704989	0.289767	NG	58.2	648	1113	376	25	89	757	68	1	1083	1083	100	100	1	1054	1054	0	974	2517
305	AT1G04310.1	AL1G13910.t1	0.0226612	0.196892	0.115095	NG	93.2	601	645	39	3	5	613	95	1	644	646	99.7	99.7	1	641	653	0	1123	2905
306	AT1G04330.1	AL1G13930.t1	0.0178152	0.186148	0.0957044	NG	96	97	101	4	0	0	98	97	1	101	101	100	100	1	101	101	1.23e-66	195	495
307	AT1G04340.1	AL1G13940.t1	0.0168802	0.099961	0.168868	NG	96.3	154	160	6	0	0	157	98.1	1	160	160	100	100	1	160	160	2.54e-103	292	748
308	AT1G04350.1	AL1G13950.t1	0.035333	0.162355	0.217628	NG	92.3	334	362	27	1	1	343	94.8	1	361	361	100	100	1	362	362	2.43e-249	678	1750
309	AT1G04360.1	AL1G13960.t1	0.0316368	0.188237	0.168069	NG	91.1	349	383	33	1	1	361	94.3	1	382	382	100	100	1	383	383	3.39e-246	672	1734
310	AT1G04370.1	AL1G13970.t1	0.0300111	0.19526	0.153698	NG	85.2	115	135	19	1	1	117	86.7	1	134	134	100	100	1	135	135	5.59e-72	211	537
311	AT1G04380.1	AL1G13980.t1	0.0368874	0.133262	0.276802	NG	92.2	320	347	26	1	1	330	95.1	1	346	346	100	100	1	347	347	5.71e-245	666	1718
312	AT1G04390.1	AL1G14000.t1	0.0265533	0.105314	0.252134	NG	94.2	944	1002	58	0	0	965	96.3	1	1002	1003	99.9	99.9	1	1002	1010	0	1876	4860
313	AT1G04400.1	AL1G14010.t1	0.0106029	0.121123	0.087538	NG	97.6	598	613	15	0	0	607	99	1	613	613	100	100	1	613	613	0	1230	3182
314	AT1G04410.1	AL1G14020.t1	0.0039699	0.132779	0.0298986	NG	99.1	330	333	3	0	0	333	100	1	333	333	100	100	1	333	333	9.75e-237	644	1661
315	AT1G04420.1	AL1G14030.t1	0.0160434	0.107326	0.149483	NG	96.7	292	302	10	0	0	298	98.7	112	413	413	73.1	73.1	1	302	302	2.12e-212	585	1507
316	AT1G04430.1	AL3G37950.t1	0.121946	1.90311	0.0640775	NG	79	496	628	114	6	18	550	87.6	2	624	624	99.8	99.8	1	615	615	0	1026	2652
317	AT1G04440.1	AL1G14080.t1	0.014589	0.129894	0.112315	NG	96.8	454	469	15	0	0	460	98.1	1	469	469	100	100	1	469	469	0	884	2283
318	AT1G04445.1	AL1G14090.t1	0.218565	0.489337	0.446656	NG	70.2	66	94	23	1	5	70	74.5	80	173	173	54.3	54.3	26	114	114	5.82e-37	123	309
319	AT1G04450.1	AL1G14100.t1	0.0301301	0.0702637	0.428814	NG	84.2	186	221	34	1	1	193	87.3	1	221	221	100	100	1	220	220	2.43e-126	355	912
320	AT1G04470.1	AL4G29090.t1	0.0904555	1.23491	0.0732485	NG	83.6	874	1046	157	9	15	941	90	1	1036	1036	100	100	1	1041	1041	0	1659	4296
321	AT1G04480.1	AL1G14130.t1	NA	0.113995	0	NG	100	141	141	0	0	0	141	100	1	141	141	100	100	1	141	141	1.14e-99	281	720
322	AT1G04490.1	AL1G14140.t1	0.0924377	0.182792	0.505698	NG	82.1	330	402	61	5	11	357	88.8	1	392	402	97.5	97.5	1	401	411	1.45e-229	632	1630
323	AT1G04500.1	AL1G14150.t1	0.00993324	0.142903	0.0695101	NG	97.7	378	387	9	0	0	382	98.7	1	387	387	100	100	1	387	387	2.24e-267	726	1874
324	AT1G04520.1	AL1G14170.t1	0.01301	0.126592	0.102771	NG	90.9	280	308	28	0	0	285	92.5	1	308	308	100	100	1	308	308	9.72e-181	500	1288
325	AT1G04530.1	AL1G14180.t1	0.0385332	0.127541	0.302125	NG	81.9	258	315	51	2	6	266	84.4	1	311	311	100	100	1	313	313	2.3e-174	484	1247
326	AT1G04540.1	AL1G14190.t1	0.0270101	0.254994	0.105925	NG	88.7	534	602	44	1	24	551	91.5	1	602	602	100	100	1	578	578	0	942	2434
327	AT1G04550.2	AL1G14220.t1	0.014647	0.117533	0.12462	NG	97.1	233	240	7	0	0	234	97.5	1	240	240	100	100	1	240	240	1.41e-162	449	1154
328	AT1G04555.1	AL1G14230.t1	0.0177456	0.149194	0.118943	NG	95.4	146	153	6	1	1	149	97.4	1	153	153	100	100	1	152	152	6.16e-80	233	593
329	AT1G04560.1	AL1G14240.t1	0.0238787	0.217308	0.109884	NG	93.7	177	189	10	1	2	179	94.7	1	187	187	100	100	1	189	189	6.38e-122	342	876
330	AT1G04570.1	AL1G14250.t1	0.0214293	0.115522	0.1855	NG	93.4	507	543	36	0	0	517	95.2	1	543	543	100	100	1	543	543	0	936	2419
331	AT1G04590.1	AL1G14270.t1	0.0409157	0.109574	0.373407	NG	90.3	343	380	34	1	3	353	92.9	2	381	382	99.5	99.5	3	379	396	5.01e-242	662	1708
332	AT1G04610.1	AL1G14290.t1	0.00646612	0.120291	0.0537539	NG	97.5	427	438	11	0	0	432	98.6	1	438	438	100	100	1	438	438	0	870	2248
333	AT1G04620.1	AL1G14300.t1	0.0181508	0.0884832	0.205133	NG	96.5	443	459	16	0	0	453	98.7	5	463	463	99.1	99.1	4	462	462	0	899	2322
334	AT1G04625.1	AL3G23800.t1	0.321404	NA	NA	NG	62.7	79	126	47	0	0	101	80.2	103	228	258	48.8	48.8	2	127	143	1.33e-60	187	476
335	AT1G04635.1	AL1G14320.t1	0.011338	0.14676	0.0772552	NG	97.4	148	152	4	0	0	149	98	1	152	152	100	100	1	152	152	4.86e-104	293	751
336	AT1G04640.1	AL1G14330.t1	0.0112527	0.115775	0.0971946	NG	97.5	230	236	6	0	0	233	98.7	1	236	236	100	100	1	236	236	2.78e-167	460	1184
337	AT1G04645.1	AL1G14350.t1	0.0753932	0.0965286	0.781045	NG	86	111	129	18	0	0	117	90.7	1	129	129	100	100	1	129	129	3.01e-87	249	636
338	AT1G04650.1	AL1G14360.t1	0.0305453	0.0951313	0.321085	NG	93.2	932	1000	65	2	3	970	97	1	998	998	100	100	1	999	999	0	1770	4584
339	AT1G04660.1	AL1G14370.t1	0.0136256	0.137858	0.0988381	NG	98.3	114	116	2	0	0	114	98.3	1	116	213	54.5	54.5	1	116	212	1.12e-42	142	359
340	AT1G04670.1	AL1G14380.t1	0.0106215	0.055448	0.191558	NG	96.9	123	127	4	0	0	124	97.6	1	127	127	100	100	1	127	127	9.28e-56	169	429
341	AT1G04680.1	AL1G14390.t1	0.00704876	0.209653	0.0336211	NG	98.2	425	433	7	1	1	426	98.4	1	432	432	100	100	1	433	433	7.03e-294	797	2058
342	AT1G04690.1	AL1G14400.t1	0.00266048	0.137442	0.0193571	NG	99.4	327	329	2	0	0	329	100	1	329	329	100	100	1	329	329	8.81e-247	669	1726
343	AT1G04700.1	AL1G14410.t1	0.0178318	0.0852139	0.209259	NG	95.7	1002	1047	40	2	5	1019	97.3	1	1043	1043	100	100	1	1046	1046	0	2001	5183
344	AT1G04710.1	AL1G14430.t1	0.0285858	0.180297	0.158548	NG	94.4	419	444	24	1	1	432	97.3	1	443	444	99.8	99.8	1	444	447	2.46e-296	804	2077
345	AT1G04730.1	AL1G14450.t1	0.0183055	0.11333	0.161524	NG	95.8	905	945	38	2	2	923	97.7	1	944	944	100	100	1	944	944	0	1753	4540
346	AT1G04750.1	AL1G14460.t1	0.001945	0.0738453	0.0263389	NG	99.5	219	220	1	0	0	220	100	1	220	220	100	100	1	220	220	2.89e-152	421	1082
347	AT1G04760.1	AL1G14470.t1	0.00386624	0.098105	0.0394092	NG	99.1	219	221	2	0	0	221	100	1	221	221	100	100	1	221	221	1.88e-153	424	1090
348	AT1G04770.1	AL1G14480.t1	0.0120978	0.0884729	0.136741	NG	96.4	295	306	8	2	3	299	97.7	2	304	304	99.7	99.7	1	306	306	2.38e-207	567	1462
349	AT1G04780.1	AL1G14500.t1	0.00917265	0.145604	0.0629974	NG	97.7	648	663	15	0	0	656	98.9	3	665	665	99.7	99.7	2	664	664	0	1234	3194
350	AT1G04790.1	AL1G14510.t1	0.0630684	0.113765	0.554376	NG	86.1	549	638	83	5	6	577	90.4	1	635	635	100	100	1	635	635	0	1017	2630
351	AT1G04800.1	AL1G14520.t1	0.0584101	0.206318	0.283107	NG	80	40	50	10	0	0	43	86	1	50	201	24.9	24.9	1	50	199	1.62e-20	84.7	208
352	AT1G04810.1	AL4G28170.t1	0.0390357	0.564864	0.0691064	NG	89.6	902	1007	93	3	12	932	92.6	1	1000	1002	99.8	99.8	1	1002	1003	0	1709	4426
353	AT1G04820.1	AL1G57580.t1	NA	0.178046	0	NG	100	451	451	0	0	0	451	100	1	451	451	100	100	1	451	451	0	904	2335
354	AT1G04830.1	AL1G14550.t1	0.00871326	0.12451	0.0699802	NG	98	440	449	9	0	0	444	98.9	1	449	449	100	100	1	449	449	0	879	2270
355	AT1G04840.1	AL1G14560.t1	0.0368674	0.156599	0.235425	NG	91.9	612	666	53	1	1	634	95.2	1	666	666	100	100	1	665	665	0	1119	2895
356	AT1G04850.1	AL1G14570.t1	0.0105446	0.105717	0.0997433	NG	96.1	398	414	16	0	0	403	97.3	1	414	414	100	100	1	414	414	3.88e-224	619	1596
357	AT1G04860.1	AL1G14580.t1	0.0421819	0.133512	0.315941	NG	87.2	841	964	85	5	38	867	89.9	1	962	962	100	100	1	928	928	0	1586	4107
358	AT1G04870.2	AL1G14590.t1	0.00802323	0.127468	0.0629433	NG	95.3	366	384	7	1	11	371	96.6	1	384	384	100	100	1	373	373	2.2e-272	738	1905
359	AT1G04880.1	AL1G14600.t1	0.0360619	0.0907278	0.397473	NG	90.2	405	449	44	0	0	424	94.4	1	449	449	100	100	1	449	449	1.93e-281	767	1980
360	AT1G04890.1	AL1G14610.t1	0.0277172	0.148575	0.186553	NG	92.1	386	419	25	2	8	399	95.2	1	412	412	100	100	87	504	504	1.11e-249	687	1773
361	AT1G04900.1	AL1G14620.t1	0.011816	0.106409	0.111042	NG	96.4	432	448	11	1	5	438	97.8	1	443	443	100	100	1	448	448	0	877	2267
362	AT1G04910.1	AL1G14630.t1	0.00883522	0.105235	0.083957	NG	98.1	510	520	10	0	0	518	99.6	1	520	520	100	100	1	520	520	0	1043	2698
363	AT1G04930.1	AL1G14650.t1	0.067884	0.123947	0.547684	NG	79.9	266	333	61	3	6	283	85	1	333	333	100	100	1	327	327	3.09e-153	432	1112
364	AT1G04940.1	AL1G14660.t1	0.0130387	0.148762	0.087648	NG	96.7	266	275	8	1	1	270	98.2	1	275	275	100	100	1	274	274	1.5e-197	540	1391
365	AT1G04945.2	AL1G14670.t1	0.0452738	0.140189	0.322949	NG	90.1	354	393	39	0	0	372	94.7	1	393	393	100	100	1	393	393	1.07e-268	730	1884
366	AT1G04950.1	AL1G14680.t2	0.0181832	0.0915931	0.198522	NG	92.8	517	557	31	2	9	527	94.6	1	550	550	100	100	1	555	555	0	934	2414
367	AT1G04960.1	AL1G14690.t1	0.0309895	0.1195	0.259326	NG	94	299	318	19	0	0	305	95.9	1	318	318	100	100	1	318	318	5e-211	578	1489
368	AT1G04970.1	AL1G14700.t1	0.016948	0.0910548	0.18613	NG	96.7	471	487	16	0	0	481	98.8	1	487	489	99.6	99.6	1	487	502	0	931	2405
369	AT1G04980.1	AL1G14710.t1	0.0170228	0.0908206	0.187433	NG	95.3	423	444	16	1	5	434	97.7	5	448	448	99.1	99.1	1	439	439	8.67e-305	843	2178
370	AT1G04985.1	AL1G14720.t1	0.0186583	0.0955678	0.195236	NG	95.9	186	194	8	0	0	188	96.9	1	194	194	100	100	1	194	194	5.01e-122	342	878
371	AT1G04990.1	AL1G14730.t2	0.03857	0.0708533	0.544365	NG	91.5	377	412	28	1	7	391	94.9	1	405	405	100	100	1	412	412	3.33e-194	543	1398
372	AT1G05000.1	AL1G14740.t1	0.0256423	0.207578	0.123531	NG	93.5	203	217	12	2	2	207	95.4	1	216	216	100	100	1	216	216	1.32e-146	406	1044
373	AT1G05005.1	AL1G14750.t1	0.123367	0.281569	0.438139	NG	64.6	135	209	36	6	38	146	69.9	1	175	228	76.8	76.8	1	205	218	8.6e-74	223	567
374	AT1G05010.1	AL1G14760.t1	0.011974	0.134364	0.0891161	NG	97.2	315	324	9	0	0	319	98.5	1	324	324	100	100	5	328	328	2.99e-232	632	1630
375	AT1G05020.1	AL1G14770.t1	0.0230366	0.12001	0.191956	NG	92.1	604	656	38	4	14	619	94.4	1	654	654	100	100	1	644	644	0	1146	2965
376	AT1G05030.1	AL1G14780.t1	0.0310673	0.0983922	0.31575	NG	92.9	486	523	31	3	6	502	96	1	521	525	99.2	99.2	1	519	522	0	949	2454
377	AT1G05040.1	AL1G14790.t1	0.0459479	0.189303	0.242721	NG	91.4	139	152	13	0	0	141	92.8	3	154	167	91	91	2	153	166	1.22e-95	273	699
378	AT1G05055.1	AL1G14800.t1	0.00359136	0.144063	0.0249291	NG	98.8	417	422	5	0	0	417	98.8	1	422	422	100	100	1	422	422	1.78e-305	835	2158
379	AT1G05060.1	AL1G14810.t1	0.0193958	0.162798	0.11914	NG	96.1	244	254	10	0	0	249	98	1	254	254	100	100	1	254	254	9.23e-175	481	1237
380	AT1G05065.1	AL4G28020.t1	0.367336	0.665211	0.55221	NG	54.1	40	74	32	2	2	46	62.2	12	84	84	86.9	86.9	3	75	75	2.69e-15	63.9	154
381	AT1G05070.1	AL1G14830.t1	0.0220369	0.154971	0.1422	NG	95.6	173	181	8	0	0	175	96.7	1	181	185	97.8	97.8	1	181	182	1.09e-104	298	762
382	AT1G05080.1	AL1G14840.t1	0.0618432	0.107845	0.573443	NG	86.6	380	439	49	3	10	402	91.6	1	437	440	99.3	99.3	1	431	483	8.48e-268	733	1893
383	AT1G05100.1	AL1G14870.t1	0.0255151	0.109895	0.232176	NG	94.4	320	339	19	0	0	329	97.1	1	339	340	99.7	99.7	1	339	342	1.06e-244	665	1715
384	AT1G05120.1	AL1G14880.t1	0.0310656	0.115571	0.2688	NG	85.6	722	843	112	2	9	742	88	1	834	834	100	100	1	843	843	0	1387	3590
385	AT1G05140.1	AL1G14900.t1	0.0288167	0.127729	0.225608	NG	93.9	415	442	24	2	3	423	95.7	1	442	442	100	100	1	439	439	1.49e-283	771	1992
386	AT1G05150.1	AL1G14910.t1	0.00831501	0.157176	0.0529027	NG	96.8	785	811	23	2	3	793	97.8	1	809	809	100	100	1	810	810	0	1311	3393
387	AT1G05160.1	AL1G14920.t1	0.0186691	0.146277	0.127628	NG	95.7	470	491	21	0	0	483	98.4	1	491	491	100	100	1	491	491	0	966	2498
388	AT1G05170.2	AL1G14930.t1	0.0116746	0.106718	0.109396	NG	97.3	397	408	11	0	0	402	98.5	1	408	408	100	100	1	408	408	8.69e-303	817	2111
389	AT1G05180.1	AL1G14940.t1	0.0193481	0.1386	0.139597	NG	95.6	517	541	24	0	0	528	97.6	1	541	541	100	100	1	541	541	0	1014	2621
390	AT1G05190.1	AL1G14950.t1	0.00591984	0.167092	0.0354286	NG	98.7	221	224	3	0	0	222	99.1	1	224	224	100	100	28	251	251	1.54e-153	426	1094
391	AT1G05200.1	AL4G27780.t1	0.127335	0.660301	0.192845	NG	75.6	730	965	214	5	21	845	87.6	1	957	960	99.7	99.7	1	952	959	0	1465	3792
392	AT1G05205.1	AL1G14970.t1	0.009512	0.163085	0.0583254	NG	97.8	90	92	2	0	0	91	98.9	1	92	92	100	100	1	92	92	4.33e-65	190	483
393	AT1G05210.1	AL1G14980.t1	0.0215329	0.186606	0.115392	NG	95.9	162	169	7	0	0	165	97.6	1	169	169	100	100	1	169	169	3.56e-112	315	808
394	AT1G05220.1	AL1G14990.t1	0.0139339	0.170835	0.0815634	NG	97.5	157	161	4	0	0	157	97.5	1	161	161	100	100	1	161	161	5.76e-105	296	759
395	AT1G05230.1	AL1G15000.t1	0.00667214	0.150171	0.0444302	NG	98.6	712	722	10	0	0	719	99.6	1	722	722	100	100	1	722	722	0	1371	3548
396	AT1G05240.1	AL1G15010.t1	0.100187	0.14603	0.686071	NG	82.3	269	327	52	2	6	292	89.3	1	326	326	100	100	1	322	322	1.45e-190	526	1356
397	AT1G05260.1	AL1G15040.t1	0.0107581	0.160576	0.0669968	NG	97.7	302	309	7	0	0	306	99	19	327	327	94.5	94.5	2	310	310	2.31e-221	604	1557
398	AT1G05270.1	AL1G15050.t1	0.0129214	0.128328	0.100691	NG	96.2	359	373	13	1	1	367	98.4	1	372	372	100	100	1	373	373	2.08e-251	684	1766
399	AT1G05280.1	AL1G15060.t2	0.0340245	0.188075	0.18091	NG	92.5	457	494	35	2	2	471	95.3	1	492	492	100	100	1	494	494	0	937	2423
400	AT1G05290.1	AL1G15070.t1	0.0786992	0.172878	0.45523	NG	82	301	367	61	5	5	329	89.6	1	365	370	98.6	98.6	1	364	371	9.74e-203	561	1446
401	AT1G05291.1	AL1G15080.t1	0.0971779	0.149111	0.651715	NG	83.2	149	179	29	1	1	160	89.4	1	178	205	86.8	86.8	1	179	189	9.78e-101	289	739
402	AT1G05300.1	AL1G15100.t1	0.0206821	0.130952	0.157936	NG	92.8	335	361	23	2	3	342	94.7	1	361	361	100	100	1	358	358	1.27e-211	583	1502
403	AT1G05310.1	AL1G15110.t1	0.0280515	0.242423	0.115713	NG	95.9	348	363	14	1	1	354	97.5	32	394	394	92.1	92.1	10	371	371	3.99e-252	687	1773
404	AT1G05320.1	AL1G15120.t1	0.0557158	0.158638	0.351215	NG	65	564	868	207	8	97	591	68.1	1	791	791	100	100	1	848	848	2.54e-214	625	1613
405	AT1G05330.1	AL1G15130.t1	0.0768983	0.0847933	0.906891	NG	86.6	116	134	17	1	1	124	92.5	1	134	138	97.1	97.1	1	133	135	1.4e-82	238	607
406	AT1G05340.1	AL1G15140.t1	0.0183506	0.153227	0.11976	NG	93.2	68	73	5	0	0	68	93.2	1	73	73	100	100	1	73	73	3.02e-43	134	336
407	AT1G05350.1	AL1G15150.t1	0.00610106	0.132063	0.046198	NG	98.6	426	432	6	0	0	429	99.3	1	432	432	100	100	1	432	432	6.19e-305	827	2137
408	AT1G05360.1	AL1G15180.t1	0.0137792	0.136814	0.100714	NG	96.9	404	417	13	0	0	410	98.3	1	417	417	100	100	1	417	417	3.97e-299	809	2089
409	AT1G05370.1	AL1G15190.t1	0.0052882	0.118033	0.0448029	NG	99	414	418	4	0	0	417	99.8	1	418	418	100	100	1	418	418	1.43e-297	805	2079
410	AT1G05380.1	AL1G15210.t1	0.0358235	0.110585	0.323944	NG	90.1	1027	1140	94	5	19	1062	93.2	1	1139	1139	100	100	1	1122	1122	0	1960	5078
411	AT1G05385.1	AL1G15220.t1	0.0230104	0.0913956	0.251767	NG	95	190	200	10	0	0	194	97	1	200	200	100	100	1	200	200	7.15e-134	373	957
412	AT1G05410.1	AL1G15260.t1	0.0329741	0.11051	0.298382	NG	92.8	438	472	32	1	2	453	96	1	472	472	100	100	1	470	470	0	900	2327
413	AT1G05420.1	AL1G15250.t1	0.0198375	0.123221	0.160992	NG	90.5	209	231	18	2	4	212	91.8	1	227	227	100	100	1	231	231	1.46e-108	311	797
414	AT1G05430.1	AL1G15270.t1	0.0468114	0.107329	0.436148	NG	88.5	239	270	31	0	0	247	91.5	1	270	270	100	100	1	270	270	1.55e-158	441	1134
415	AT1G05440.1	AL1G15280.t1	0.0656149	0.199951	0.328155	NG	77	292	379	84	1	3	310	81.8	16	394	394	96.2	96.2	1	376	376	7.02e-175	492	1266
416	AT1G05450.2	AL1G15290.t1	0.0559937	0.17244	0.324714	NG	88.8	151	170	19	0	0	154	90.6	37	206	206	82.5	82.5	1	170	170	4.37e-79	233	595
417	AT1G05460.1	AL1G15300.t1	0.0181119	0.130626	0.138655	NG	94.4	967	1024	32	3	25	979	95.6	1	1003	1003	100	100	1	1020	1020	0	1791	4640
418	AT1G05470.1	AL4G27370.t1	0.0562692	0.958684	0.0586942	NG	82.5	518	628	69	8	41	547	87.1	1	618	618	100	100	1	597	597	0	951	2457
419	AT1G05490.1	AL1G15330.t1	0.0391869	0.122898	0.318858	NG	86.1	1235	1434	169	5	30	1274	88.8	1	1411	1411	100	100	1	1427	1427	0	2051	5314
420	AT1G05500.1	AL1G15340.t1	0.00585552	0.0902066	0.0649123	NG	96.2	554	576	7	1	15	559	97	1	561	561	100	100	1	576	576	0	1082	2798
421	AT1G05510.1	AL1G15350.t1	0.0143591	0.128828	0.11146	NG	97.5	236	242	6	0	0	239	98.8	1	242	242	100	100	1	242	242	2.4e-180	494	1271
422	AT1G05530.1	AL1G15380.t1	0.0382873	0.126798	0.301955	NG	91.9	418	455	35	2	2	434	95.4	1	454	456	99.6	99.6	1	454	460	1.49e-301	818	2114
423	AT1G05540.1	AL1G15390.t1	0.0378242	0.11577	0.326717	NG	91.8	338	368	30	0	0	351	95.4	1	368	368	100	100	1	368	368	9.42e-264	715	1846
424	AT1G05550.3	AL1G15400.t1	0.0820093	0.148328	0.552893	NG	81.2	285	351	39	1	27	301	85.8	63	386	386	83.9	83.9	19	369	369	2.16e-212	586	1511
425	AT1G05560.1	AL1G15430.t1	0.0369509	0.117296	0.315022	NG	91.7	429	468	38	1	1	451	96.4	1	468	470	99.6	99.6	1	467	475	1.8e-305	852	2202
426	AT1G05575.1	AL1G15450.t1	0.0567065	0.199113	0.284796	NG	96.2	76	79	3	0	0	76	96.2	8	86	90	87.8	87.8	1	79	84	1.98e-41	130	327
427	AT1G05577.1	AL1G15460.t1	0.0188066	0.106627	0.176377	NG	94.7	356	376	16	2	4	360	95.7	1	373	373	100	100	1	375	375	1.47e-254	692	1787
428	AT1G05580.1	AL1G15470.t1	0.0217594	0.105203	0.206832	NG	94	816	868	51	1	1	832	95.9	1	868	868	100	100	1	867	867	0	1591	4119
429	AT1G05590.1	AL1G15490.t1	0.029983	0.113848	0.263359	NG	93.5	543	581	36	1	2	555	95.5	1	581	581	100	100	1	579	579	0	1120	2898
430	AT1G05600.1	AL1G15500.t1	0.0211239	0.111579	0.189318	NG	94.8	476	502	26	0	0	486	96.8	4	505	505	99.4	99.4	3	504	504	3.64e-256	707	1826
431	AT1G05610.1	AL1G15510.t2	0.0267534	0.12124	0.220665	NG	92.4	450	487	26	3	11	465	95.5	1	477	477	100	100	1	486	486	0	870	2247
432	AT1G05610.2	AL1G15510.t1	0.0253419	0.119484	0.212094	NG	92.4	450	487	26	3	11	465	95.5	1	483	483	100	100	1	480	480	0	869	2246
433	AT1G05615.1	AL1G15520.t1	0.319836	0.548728	0.582868	NG	76.2	77	101	24	0	0	87	86.1	72	172	173	58.4	58.4	169	269	294	2.54e-48	158	399
434	AT1G05620.1	AL1G15530.t1	0.0151924	0.11494	0.132177	NG	96.6	312	323	11	0	0	318	98.5	1	323	323	100	100	1	323	323	8.91e-228	620	1600
435	AT1G05630.1	AL4G27090.t1	0.138948	0.673329	0.20636	NG	73.2	864	1180	267	7	49	969	82.1	1	1167	1171	99.7	99.7	1	1144	1145	0	1699	4400
436	AT1G05650.1	AL1G15550.t1	0.0281147	0.16076	0.174886	NG	94.8	364	384	20	0	0	372	96.9	1	384	395	97.2	97.2	1	384	944	9.47e-259	726	1874
437	AT1G05660.1	AL1G15560.t1	0.0238173	0.0889227	0.267843	NG	91.1	360	395	35	0	0	364	92.2	1	395	395	100	100	1	395	395	1.73e-259	707	1824
438	AT1G05670.1	AL1G15570.t1	0.0207334	0.130907	0.158383	NG	96.1	270	281	11	0	0	276	98.2	1	281	742	37.9	37.9	1	281	742	6.28e-188	552	1423
439	AT1G05675.1	AL1G15580.t1	0.044768	0.117092	0.382333	NG	89.8	406	452	46	0	0	429	94.9	1	452	454	99.6	99.6	1	452	453	4.92e-305	832	2149
440	AT1G05680.1	AL1G15590.t1	0.0191777	0.106286	0.180434	NG	95.8	433	452	19	0	0	443	98	1	452	454	99.6	99.6	1	452	454	0	879	2272
441	AT1G05690.1	AL1G15600.t1	0.0352898	0.118788	0.297083	NG	93.7	340	363	23	0	0	351	96.7	3	365	365	99.5	99.5	43	405	405	3.13e-252	687	1774
442	AT1G05700.2	AL1G15610.t1	0.0354301	0.156751	0.226027	NG	90	796	884	58	3	30	816	92.3	1	884	884	100	100	1	854	854	0	1484	3843
443	AT1G05710.1	AL1G15620.t1	0.0146819	0.0819083	0.179248	NG	96.7	145	150	5	0	0	149	99.3	1	150	150	100	100	1	150	150	1.35e-100	285	728
444	AT1G05720.1	AL1G15630.t1	0.0275298	0.113358	0.242857	NG	92.3	144	156	12	0	0	151	96.8	9	164	164	95.1	95.1	1	156	156	4.32e-102	289	740
445	AT1G05730.1	AL1G15640.t1	0.0141086	0.0828316	0.170328	NG	96.7	145	150	5	0	0	149	99.3	1	150	150	100	100	1	150	150	4.02e-102	288	738
446	AT1G05750.1	AL1G15660.t1	0.0303443	0.115898	0.261819	NG	94	471	501	30	0	0	478	95.4	1	501	501	100	100	1	501	501	3.7e-305	844	2180
447	AT1G05760.2	AL1G15670.t1	0.0295752	0.188126	0.157209	NG	93.2	165	177	12	0	0	172	97.2	23	199	199	88.9	88.9	3	179	179	2.09e-121	340	873
448	AT1G05780.1	AL1G15680.t2	0.0248244	0.152935	0.16232	NG	94.4	101	107	6	0	0	104	97.2	1	107	107	100	100	1	107	107	5.47e-66	194	492
449	AT1G05790.1	AL1G15700.t1	0.0150585	0.0816558	0.184414	NG	91.9	667	726	21	2	38	678	93.4	1	688	688	100	100	1	726	726	0	1329	3440
450	AT1G05800.1	AL1G15720.t1	0.0271775	0.131778	0.206237	NG	94.8	380	401	21	0	0	393	98	72	472	472	85	85	32	432	432	3.19e-291	792	2045
451	AT1G05805.1	AL1G15730.t1	0.0148353	0.120729	0.122881	NG	93.4	339	363	19	3	5	349	96.1	1	363	363	100	100	1	358	358	1.73e-221	608	1567
452	AT1G05810.1	AL1G15740.t1	0.0090643	0.237856	0.0381083	NG	98.2	215	219	4	0	0	217	99.1	1	219	219	100	100	1	219	219	1e-147	409	1052
453	AT1G05820.1	AL1G15750.t1	0.0218713	0.109274	0.200151	NG	91.6	492	537	45	0	0	503	93.7	1	537	537	100	100	1	537	537	0	942	2434
454	AT1G05830.1	AL4G26890.t1	0.145932	0.566557	0.257578	NG	69.8	769	1102	274	12	59	871	79	4	1082	1084	99.5	99.5	1	1066	1067	0	1506	3898
455	AT1G05835.1	AL1G15770.t1	0.0209133	0.14666	0.142598	NG	95.3	122	128	6	0	0	124	96.9	1	128	128	100	100	1	128	128	9.73e-88	250	639
456	AT1G05840.1	AL1G15780.t1	0.0140668	0.105715	0.133064	NG	96.9	471	486	14	1	1	477	98.1	1	486	486	100	100	1	485	485	0	947	2449
457	AT1G05850.1	AL1G15790.t1	0.016288	0.19814	0.0822045	NG	97.5	314	322	8	0	0	319	99.1	1	322	322	100	100	1	322	322	2.71e-242	657	1695
458	AT1G05860.1	AL1G15800.t1	0.0261963	0.200903	0.130393	NG	92.9	261	281	17	1	3	269	95.7	1	281	281	100	100	1	278	278	1.72e-185	510	1313
459	AT1G05870.1	AL1G15810.t1	0.0418418	0.0891006	0.469602	NG	89.1	171	192	15	4	6	178	92.7	1	190	190	100	100	1	188	188	1.76e-115	325	834
460	AT1G05880.2	AL1G15820.t1	0.0646373	0.123309	0.524191	NG	85.7	431	503	64	1	8	457	90.9	1	495	497	99.6	99.6	1	503	507	0	886	2289
461	AT1G05890.2	AL1G15830.t1	0.0381837	0.0759085	0.503023	NG	84.2	505	600	48	3	47	525	87.5	1	595	595	100	100	1	558	558	0	989	2558
462	AT1G05894.1	AL1G15840.t1	0.0295861	0.106734	0.277194	NG	91.8	426	464	29	4	9	435	93.8	1	458	458	100	100	1	461	461	1.58e-283	773	1996
463	AT1G05900.2	AL1G15860.t1	0.042869	0.107738	0.397902	NG	88.9	346	389	36	3	7	363	93.3	1	387	387	100	100	2	385	385	9.55e-241	659	1699
464	AT1G05910.1	AL1G15870.t1	0.0169467	0.0841506	0.201385	NG	95.3	1158	1215	47	4	10	1179	97	1	1211	1211	100	100	1	1209	1209	0	2060	5337
465	AT1G05920.1	AL1G15880.t1	0.0657251	0.134028	0.490382	NG	78.8	182	231	29	2	20	201	87	103	316	316	67.7	67.7	28	255	255	1.39e-125	359	921
466	AT1G05930.1	AL1G15890.t1	0.19247	0.228556	0.842114	NG	59.2	186	314	102	7	26	208	66.2	1	289	319	90.6	90.6	1	313	331	5.43e-105	310	793
467	AT1G05940.1	AL6G53510.t1	0.0147783	0.0873239	0.169235	NG	93.5	533	570	37	0	0	541	94.9	1	570	570	100	100	1	570	570	0	996	2575
468	AT1G05950.1	AL1G15900.t1	0.0404083	0.125463	0.322074	NG	91.2	560	614	52	2	2	582	94.8	16	628	628	97.6	97.6	3	615	615	0	1074	2777
469	AT1G05960.2	AL1G15910.t1	0.0201495	0.0885349	0.227588	NG	92.9	938	1010	45	3	27	960	95	1	1004	1004	100	100	1	989	989	0	1781	4614
470	AT1G05970.2	AL1G15920.t1	0.0535917	0.220719	0.242806	NG	89.6	180	201	21	0	0	191	95	1	201	201	100	100	1	201	201	4.79e-128	358	919
471	AT1G05990.1	AL1G15940.t1	0.012581	0.16881	0.0745276	NG	93.1	81	87	6	0	0	82	94.3	1	87	151	57.6	57.6	1	87	151	4.32e-44	142	357
472	AT1G06000.1	AL1G15950.t1	0.0205234	0.120626	0.17014	NG	95.4	414	434	20	0	0	429	98.8	3	436	436	99.5	99.5	2	435	435	4.92e-305	830	2145
473	AT1G06010.1	AL1G15960.t1	0.0334042	0.106519	0.313599	NG	92.3	72	78	6	0	0	76	97.4	1	78	79	98.7	98.7	1	78	80	1.72e-45	140	352
474	AT1G06020.1	AL1G15970.t1	0.0134578	0.189558	0.0709956	NG	97.1	336	346	10	0	0	340	98.3	1	346	346	100	100	1	346	346	3.71e-243	661	1706
475	AT1G06030.1	AL1G15980.t1	0.0155269	0.200716	0.0773577	NG	95.2	317	333	11	2	5	322	96.7	1	329	330	99.7	99.7	1	332	334	2.95e-226	617	1592
476	AT1G06040.1	AL1G15990.t1	0.0200746	0.162966	0.123182	NG	95.2	237	249	11	1	1	242	97.2	1	249	249	100	100	1	248	248	1.94e-171	472	1214
477	AT1G06050.1	AL1G16000.t1	0.0255955	0.16039	0.159583	NG	93.3	293	314	16	3	5	301	95.9	1	312	314	99.4	99.4	1	311	314	8.64e-210	574	1480
478	AT1G06060.1	AL1G16010.t1	0.0286216	0.131987	0.216852	NG	93.9	201	214	13	0	0	206	96.3	1	214	214	100	100	1	214	214	1.55e-144	401	1030
479	AT1G06070.1	AL1G16020.t1	0.0164443	0.179198	0.0917663	NG	94.6	406	429	17	3	6	409	95.3	1	424	424	100	100	1	428	428	1.74e-233	644	1660
480	AT1G06080.1	AL1G16030.t1	0.00293674	0.0831234	0.0353299	NG	99.3	290	292	2	0	0	291	99.7	15	306	306	95.4	95.4	1	292	292	4.71e-227	617	1590
481	AT1G06090.1	AL1G16040.t1	0.0298995	0.225594	0.132537	NG	93.7	281	300	19	0	0	292	97.3	1	300	300	100	100	1	300	300	9.64e-225	611	1575
482	AT1G06100.1	AL1G16050.t1	0.041025	0.0808743	0.507269	NG	91	273	300	27	0	0	278	92.7	1	300	300	100	100	1	300	300	1.84e-213	582	1501
483	AT1G06110.1	AL1G16060.t1	0.0285884	0.127607	0.224034	NG	93.6	409	437	27	1	1	422	96.6	1	437	437	100	100	1	436	436	2.26e-305	834	2154
484	AT1G06130.1	AL1G16070.t1	0.020072	0.155012	0.129487	NG	95.5	317	332	15	0	0	322	97	1	332	332	100	100	1	332	332	1.23e-234	639	1647
485	AT1G06140.1	AL1G16080.t1	0.030563	0.122446	0.249604	NG	93.4	522	559	37	0	0	539	96.4	1	559	559	100	100	1	559	559	0	1051	2719
486	AT1G06150.2	AL1G16100.t1	0.0365196	0.128632	0.283908	NG	91.6	674	736	58	2	4	700	95.1	1	734	737	99.6	99.6	1	734	1330	0	1307	3382
487	AT1G06150.uORF1	AL1G16110.t1	0.013443	0.0380647	0.353163	NG	97.1	34	35	1	0	0	35	100	1	35	35	100	100	21	55	55	3.99e-19	70.9	172
488	AT1G06160.1	AL1G16120.t1	0.022197	0.141983	0.156335	NG	80.4	197	245	41	2	7	199	81.2	1	245	245	100	100	1	238	238	4.92e-99	288	737
489	AT1G06170.1	AL1G16130.t1	0.0274866	0.179133	0.153442	NG	93.8	396	422	25	1	1	411	97.4	1	421	421	100	100	1	422	422	7.51e-288	781	2016
490	AT1G06180.1	AL1G16140.t1	0.0336242	0.124521	0.270029	NG	85.8	218	254	25	4	11	228	89.8	1	247	247	100	100	1	250	250	3.22e-124	352	904
491	AT1G06190.1	AL1G16170.t1	0.0510405	0.127386	0.400676	NG	70.4	286	406	112	2	8	306	75.4	1	402	402	100	100	1	402	402	5.15e-159	453	1165
492	AT1G06200.1	AL1G16180.t1	0.0244887	0.148062	0.165395	NG	94.6	194	205	11	0	0	200	97.6	1	205	207	99	99	1	205	206	5.43e-139	386	992
493	AT1G06210.1	AL1G16190.t1	0.0185026	0.170265	0.108669	NG	93	357	384	27	0	0	362	94.3	1	384	384	100	100	1	384	384	1.83e-237	650	1677
494	AT1G06225.1	AL1G16210.t1	0.0461223	0.181317	0.254374	NG	91.7	77	84	7	0	0	81	96.4	1	84	84	100	100	1	84	84	2.47e-47	145	365
495	AT1G06230.1	AL1G16220.t1	0.0359611	0.149681	0.240252	NG	89.6	656	732	70	2	6	670	91.5	1	729	767	95	95	1	729	768	0	1070	2766
496	AT1G06240.1	AL1G16230.t1	0.0201738	0.144479	0.139631	NG	93.8	360	384	17	2	7	367	95.6	1	384	384	100	100	2	378	378	1.24e-261	711	1835
497	AT1G06250.1	AL1G16240.t1	0.0204091	0.0929075	0.219671	NG	95.1	328	345	17	0	0	338	98	1	345	424	81.4	81.4	1	345	346	7.76e-247	674	1739
498	AT1G06260.1	AL1G16260.t1	0.0101637	0.0570763	0.178073	NG	97.7	336	344	8	0	0	342	99.4	1	344	344	100	100	1	344	344	4.09e-255	691	1784
499	AT1G06270.1	AL1G16280.t1	0.0181263	0.137184	0.132132	NG	96.5	332	344	12	0	0	337	98	1	344	344	100	100	1	344	344	7.53e-203	559	1441
500	AT1G06280.1	AL1G16290.t1	0.0199475	0.207967	0.0959165	NG	79.7	149	187	35	3	3	150	80.2	22	207	207	89.9	89.9	22	206	206	4.23e-97	280	717
501	AT1G06290.1	AL1G16310.t1	0.010398	0.11819	0.0879769	NG	97.6	660	676	16	0	0	670	99.1	1	676	676	100	100	1	676	676	0	1336	3458
502	AT1G06320.1	AL1G16330.t1	0.104109	0.233983	0.444941	NG	78	156	200	39	4	5	171	85.5	1	196	196	100	100	3	201	201	1.41e-91	266	679
503	AT1G06330.1	AL1G16340.t1	0.00851307	0.150044	0.0567372	NG	98	148	151	3	0	0	149	98.7	1	151	151	100	100	1	151	151	3.43e-108	304	778
504	AT1G06340.1	AL1G16350.t1	0.077866	0.158439	0.491458	NG	84.8	112	132	20	0	0	120	90.9	1	132	135	97.8	97.8	1	132	140	8.85e-84	241	615
505	AT1G06350.1	AL1G16360.t1	0.0517976	0.160921	0.321883	NG	90	271	301	29	1	1	288	95.7	1	301	301	100	100	1	300	300	6.69e-214	583	1504
506	AT1G06360.1	AL1G16370.t1	0.0172233	0.13034	0.132142	NG	96.3	289	300	11	0	0	295	98.3	1	300	300	100	100	1	300	300	6.57e-232	629	1622
507	AT1G06380.1	AL1G16390.t1	0.0294202	0.0996614	0.295202	NG	91.2	229	251	15	2	7	235	93.6	6	255	255	98	98	4	248	248	3.03e-156	434	1115
508	AT1G06390.1	AL1G16400.t1	0.00755005	0.131995	0.0571997	NG	97.6	401	411	7	1	3	404	98.3	1	408	408	100	100	1	411	411	2.67e-300	811	2095
509	AT1G06400.1	AL1G16410.t1	0.0122068	0.168432	0.0724732	NG	97.2	211	217	6	0	0	215	99.1	1	217	217	100	100	1	217	217	1.89e-151	419	1076
510	AT1G06420.1	AL1G16430.t1	0.107884	0.198206	0.544304	NG	67.1	155	231	47	5	29	169	73.2	1	218	222	98.2	98.2	1	215	219	3.49e-79	236	602
511	AT1G06430.1	AL4G25980.t1	0.0496035	0.544987	0.0910179	NG	88.6	624	704	58	7	22	653	92.8	1	686	686	100	100	1	700	700	0	1150	2974
512	AT1G06440.1	AL1G16450.t1	0.0190921	0.12995	0.146918	NG	95.7	374	391	17	0	0	385	98.5	1	391	391	100	100	1	391	391	9.96e-273	740	1910
513	AT1G06450.1	AL1G16460.t1	0.0159649	0.170971	0.0933776	NG	95	343	361	13	2	5	349	96.7	1	361	361	100	100	1	356	356	1.14e-257	699	1804
514	AT1G06460.1	AL1G16470.t1	0.0283178	0.0937345	0.302106	NG	94.4	270	286	15	1	1	274	95.8	1	286	286	100	100	1	285	285	2.61e-160	447	1149
515	AT1G06470.1	AL1G16480.t1	0.0138768	0.0770907	0.180006	NG	97.1	403	415	12	0	0	406	97.8	1	415	415	100	100	1	415	415	1.77e-285	774	1999
516	AT1G06475.1	AL1G16490.t1	0.0254508	0.290115	0.0877264	NG	78.7	74	94	13	2	7	75	79.8	1	94	94	100	100	1	87	87	3.45e-39	125	313
517	AT1G06490.1	AL4G27310.t1	0.354148	NA	NA	NG	54.3	1075	1979	812	30	92	1401	70.8	9	1933	1959	98.3	98.3	5	1945	1947	0	2000	5182
518	AT1G06500.1	AL1G16520.t1	0.0582531	0.217283	0.268098	NG	84.9	118	139	17	1	4	123	88.5	1	135	137	98.5	98.5	1	139	140	6.22e-80	231	590
519	AT1G06510.1	AL1G16540.t1	0.0450047	0.130604	0.344589	NG	80.6	225	279	46	2	8	235	84.2	1	278	278	100	100	1	272	272	9.01e-135	381	979
520	AT1G06515.1	AL1G16530.t1	0.00750894	0.0609639	0.12317	NG	98.2	56	57	1	0	0	57	100	1	57	57	100	100	1	57	57	2.2e-38	120	301
521	AT1G06520.1	AL1G16550.t1	0.0318221	0.141224	0.22533	NG	93	545	586	40	1	1	563	96.1	1	586	586	100	100	1	585	585	0	1057	2733
522	AT1G06530.1	AL1G16560.t1	0.0490877	0.130749	0.375434	NG	76.1	245	322	76	1	1	259	80.4	1	322	324	99.4	99.4	1	321	323	4.5e-128	368	945
523	AT1G06540.1	AL1G16570.t1	0.0253858	0.151863	0.167162	NG	92.1	116	126	9	1	1	123	97.6	1	125	126	99.2	99.2	1	126	129	1.04e-75	220	560
524	AT1G06550.1	AL1G16580.t1	0.0216879	0.108972	0.199023	NG	94.8	368	388	18	2	2	377	97.2	1	388	388	100	100	1	386	386	6.15e-265	720	1858
525	AT1G06560.1	AL1G16590.t1	0.0382071	0.107897	0.354107	NG	92	552	600	48	0	0	574	95.7	1	600	600	100	100	1	600	600	0	1095	2832
526	AT1G06570.1	AL1G16600.t1	0.0173342	0.19761	0.0877194	NG	96.4	430	446	16	0	0	438	98.2	1	446	446	100	100	1	446	446	9.75e-305	856	2211
527	AT1G06580.1	AL1G16610.t1	0.0485253	0.122696	0.395491	NG	89.7	105	117	12	0	0	110	94	1	117	501	23.4	23.4	1	117	501	4e-60	205	522
528	AT1G06590.1	AL1G16620.t1	0.0194949	0.0986925	0.197532	NG	95.9	879	917	38	0	0	895	97.6	1	917	917	100	100	1	917	917	0	1637	4239
529	AT1G06620.1	AL1G16630.t1	0.154194	0.32367	0.476392	NG	75.7	281	371	70	4	20	301	81.1	1	366	366	100	100	1	356	356	2.66e-193	536	1382
530	AT1G06630.2	AL5G42230.t1	0.204236	0.315824	0.646678	NG	66.6	257	386	126	3	3	304	78.8	14	399	404	95.5	95.5	15	397	439	2.06e-170	483	1244
531	AT1G06640.1	AL1G16640.t1	0.0459703	0.163555	0.28107	NG	91.4	338	370	31	1	1	357	96.5	1	370	370	100	100	1	369	369	2.19e-256	697	1798
532	AT1G06645.1	AL1G16650.t1	0.0477015	0.156998	0.303836	NG	90.3	336	372	29	2	7	352	94.6	14	380	380	96.6	96.6	1	370	370	5.17e-251	684	1764
533	AT1G06650.2	AL1G16660.t1	0.0482666	0.154059	0.313299	NG	90	333	370	37	0	0	347	93.8	1	370	370	100	100	1	370	370	1.06e-245	670	1728
534	AT1G06660.1	AL1G16670.t1	0.025598	0.161482	0.158519	NG	93.6	456	487	26	2	5	463	95.1	1	482	482	100	100	1	487	487	1.3e-305	867	2240
535	AT1G06670.1	AL1G16680.t1	0.0416345	0.0927611	0.448835	NG	92.6	1368	1478	95	5	15	1404	95	1	1469	1577	93.2	93.2	1	1472	1581	0	2315	6000
536	AT1G06680.1	AL1G16690.t1	0.00504084	0.0596439	0.0845155	NG	98.1	259	264	5	0	0	261	98.9	1	264	264	100	100	1	264	264	2.64e-179	493	1269
537	AT1G06690.1	AL1G16700.t1	0.0154106	0.128857	0.119594	NG	96.8	366	378	12	0	0	373	98.7	1	378	378	100	100	1	378	378	2.97e-272	738	1904
538	AT1G06700.1	AL1G16710.t1	0.00424113	0.107139	0.0395853	NG	99.2	359	362	3	0	0	360	99.4	1	362	362	100	100	1	362	362	6.32e-259	702	1813
539	AT1G06710.1	AL1G16720.t1	0.0175819	0.102903	0.170859	NG	90.6	905	999	93	1	1	922	92.3	1	998	998	100	100	1	999	999	1.33e-262	762	1968
540	AT1G06720.1	AL1G16730.t1	0.0431797	0.10149	0.425457	NG	86.7	981	1131	121	2	29	1022	90.4	1	1102	1148	96	96	1	1131	1177	0	1905	4935
541	AT1G06730.1	AL1G16740.t1	0.0255973	0.11119	0.230213	NG	93.7	461	492	27	2	4	471	95.7	1	489	489	100	100	1	491	491	0	890	2299
542	AT1G06740.1	AL1G16750.t1	0.047256	0.159176	0.296878	NG	88.8	651	733	66	4	16	673	91.8	1	727	727	100	100	1	723	723	0	1288	3333
543	AT1G06760.1	AL1G16770.t1	0.0372648	0.173238	0.215107	NG	82.2	166	202	32	2	4	169	83.7	1	198	275	72	72	1	202	279	7.53e-76	232	591
544	AT1G06770.1	AL1G16780.t1	0.0590187	0.134849	0.437666	NG	89.1	312	350	37	1	1	323	92.3	69	418	422	82.9	82.9	5	353	376	1.99e-186	522	1345
545	AT1G06780.2	AL1G16790.t1	0.0184503	0.102881	0.179337	NG	93.1	567	609	23	2	19	579	95.1	1	603	603	100	100	1	596	596	0	1113	2878
546	AT1G06790.1	AL1G16800.t1	0.0236119	0.125197	0.188597	NG	95.1	195	205	10	0	0	203	99	1	205	205	100	100	1	205	205	4.88e-148	409	1051
547	AT1G06800.1	AL1G16810.t1	0.00840362	0.213995	0.0392701	NG	97.9	461	471	10	0	0	465	98.7	46	516	516	91.3	91.3	1	471	471	0	942	2435
548	AT1G06820.1	AL1G16820.t1	0.0225452	0.110294	0.204411	NG	94.8	565	596	26	4	5	574	96.3	1	596	596	100	100	1	591	591	0	1105	2858
549	AT1G06830.1	AL1G16840.t1	0.00437899	0.201302	0.0217533	NG	99	99	100	1	0	0	100	100	1	100	100	100	100	1	100	100	2.05e-69	202	513
550	AT1G06840.1	AL1G16850.t1	0.00994072	0.0953316	0.104275	NG	96.5	923	956	29	3	4	928	97.1	1	954	954	100	100	1	954	954	0	1400	3624
551	AT1G06850.1	AL1G16860.t1	0.0227872	0.189833	0.120038	NG	86.1	291	338	38	3	9	296	87.6	1	338	338	100	100	1	329	329	2.04e-174	486	1252
552	AT1G06870.1	AL1G16890.t1	0.0200324	0.124434	0.160988	NG	95.7	353	369	12	2	4	355	96.2	1	368	368	100	100	1	366	366	1.55e-257	699	1805
553	AT1G06890.1	AL1G16910.t1	0.00123653	0.072165	0.0171348	NG	99.7	357	358	1	0	0	357	99.7	1	358	358	100	100	1	358	358	1.31e-249	679	1751
554	AT1G06900.1	AL1G16920.t1	0.00502262	0.0900725	0.055762	NG	98.3	1008	1025	17	0	0	1014	98.9	1	1025	1025	100	100	1	1025	1025	0	1941	5027
555	AT1G06910.1	AL1G16930.t1	0.038045	0.119528	0.318294	NG	88.2	345	391	43	2	3	356	91	1	391	391	100	100	1	388	388	9.8e-238	651	1680
556	AT1G06920.1	AL1G16940.t1	0.0904562	0.167858	0.538884	NG	80.9	245	303	42	4	16	259	85.5	11	309	316	94.6	94.6	1	291	297	2.61e-152	428	1101
557	AT1G06923.1	AL1G16950.t1	0.0378799	0.114099	0.331993	NG	92.9	158	170	11	1	1	164	96.5	1	169	171	98.8	98.8	1	170	172	1.37e-108	306	785
558	AT1G06930.1	AL1G16960.t1	0.0447573	0.14957	0.29924	NG	83.5	147	176	21	4	8	153	86.9	1	170	170	100	100	1	174	174	1.31e-81	238	608
559	AT1G06950.1	AL1G16990.t1	0.00894052	0.0983404	0.090914	NG	97.7	994	1017	20	1	3	1008	99.1	1	1017	1017	100	100	1	1014	1014	0	1853	4799
560	AT1G06970.1	AL1G17010.t1	0.0138155	0.144007	0.0959365	NG	97	805	830	25	0	0	820	98.8	1	830	830	100	100	1	830	830	0	1576	4080
561	AT1G06980.1	AL1G17020.t1	0.0186347	0.0946775	0.196823	NG	95.9	163	170	6	1	1	165	97.1	1	170	170	100	100	1	169	169	2.23e-113	318	816
562	AT1G06990.1	AL1G17030.t1	0.0279181	0.184697	0.151156	NG	93.4	325	348	23	0	0	337	96.8	14	361	361	96.4	96.4	1	348	348	1.72e-241	658	1697
563	AT1G07000.1	AL1G17040.t1	0.0224221	0.185048	0.121169	NG	95.5	385	403	18	0	0	397	98.5	196	598	600	67.2	67.2	1	403	405	6.4e-287	785	2028
564	AT1G07010.1	AL1G17070.t1	0.0186356	0.109224	0.170618	NG	95.2	374	393	16	1	3	386	98.2	1	390	390	100	100	1	393	393	6.07e-281	761	1964
565	AT1G07020.1	AL1G17080.t1	0.0607005	0.184125	0.329669	NG	84.6	126	149	22	1	1	134	89.9	1	148	148	100	100	1	149	149	1.04e-69	206	525
566	AT1G07030.1	AL1G17140.t1	0.0128427	0.160439	0.0800473	NG	97.2	318	327	9	0	0	325	99.4	1	327	327	100	100	1	327	327	2.6e-238	647	1670
567	AT1G07040.1	AL1G17150.t1	0.0254753	0.199023	0.128002	NG	94.6	352	372	20	0	0	361	97	1	372	372	100	100	1	372	372	5.26e-247	673	1737
568	AT1G07050.1	AL1G17160.t1	0.0286478	0.0982159	0.291682	NG	91.3	179	196	16	1	1	187	95.4	1	196	196	100	100	1	195	195	7.14e-125	350	897
569	AT1G07060.2	AL1G17180.t1	0.0462308	0.13234	0.349334	NG	90.8	228	251	23	0	0	239	95.2	28	278	278	90.3	90.3	2	252	252	2.91e-154	430	1105
570	AT1G07070.1	AL1G17190.t1	NA	0.151578	0	NG	100	113	113	0	0	0	113	100	1	113	113	100	100	1	113	113	6.71e-81	232	591
571	AT1G07080.1	AL1G17200.t1	0.0283962	0.162382	0.174873	NG	92.9	250	269	16	1	3	258	95.9	1	266	266	100	100	1	269	269	8.57e-189	517	1332
572	AT1G07090.1	AL1G17210.t1	0.00684455	0.149347	0.0458298	NG	97.5	194	199	3	1	2	194	97.5	1	197	197	100	100	1	199	199	9.82e-140	387	995
573	AT1G07110.1	AL1G17230.t1	0.0133584	0.0933777	0.143058	NG	97.2	724	745	20	1	1	733	98.4	1	745	745	100	100	1	744	744	0	1383	3580
574	AT1G07120.1	AL1G17240.t1	0.0416735	0.10615	0.392591	NG	88	344	391	47	0	0	355	90.8	1	391	393	99.5	99.5	1	391	392	5.06e-230	632	1630
575	AT1G07130.1	AL1G17250.t1	0.0379065	0.124201	0.305204	NG	91.7	143	156	13	0	0	150	96.2	1	156	161	96.9	96.9	1	156	159	1.04e-102	291	744
576	AT1G07135.1	AL1G17260.t1	0.0381146	0.0849225	0.448816	NG	84.6	132	156	14	2	10	135	86.5	1	156	156	100	100	1	146	146	2.48e-60	183	464
577	AT1G07150.2	AL1G17270.t1	0.0896308	0.249496	0.359248	NG	85.8	387	451	51	6	13	403	89.4	6	451	494	90.3	90.3	3	445	711	3.74e-270	751	1938
578	AT1G07170.1	AL1G17290.t1	NA	0.202683	0	NG	100	111	111	0	0	0	111	100	1	111	111	100	100	1	111	111	3.75e-86	245	625
579	AT1G07175.2	AL1G17300.t1	0.0591184	0.277832	0.212785	NG	85.9	61	71	8	2	2	64	90.1	3	72	72	97.2	97.2	3	72	72	5.74e-34	110	275
580	AT1G07180.1	AL1G17330.t1	0.0134864	0.158565	0.0850527	NG	97.1	496	511	14	1	1	501	98	1	511	511	100	100	1	510	510	0	989	2558
581	AT1G07200.2	AL4G24720.t1	0.207526	1.19401	0.173805	NG	61.7	644	1044	297	30	103	759	72.7	1	978	980	99.8	99.8	1	1007	1008	0	1088	2814
582	AT1G07210.1	AL1G17350.t1	0.0262814	0.163381	0.160859	NG	94.7	248	262	14	0	0	254	96.9	1	262	262	100	100	1	262	262	5.47e-171	472	1214
583	AT1G07220.1	AL1G17360.t1	0.0197175	0.107625	0.183205	NG	95.3	485	509	23	1	1	494	97.1	1	508	508	100	100	1	509	509	0	1013	2618
584	AT1G07240.1	AL1G17390.t1	0.0348696	0.222462	0.156744	NG	91.5	440	481	39	1	2	450	93.6	1	481	481	100	100	1	479	479	0	876	2263
585	AT1G07250.1	AL1G17400.t1	0.0213858	0.193383	0.110588	NG	95.4	458	480	22	0	0	465	96.9	1	480	480	100	100	1	480	480	0	913	2360
586	AT1G07260.1	AL1G17410.t1	0.0292368	0.185471	0.157636	NG	93.7	447	477	30	0	0	463	97.1	1	477	477	100	100	1	477	477	0	898	2321
587	AT1G07270.1	AL1G17420.t1	0.0416835	0.141358	0.29488	NG	88.7	456	514	45	5	13	471	91.6	1	506	506	100	100	44	552	552	1.11e-305	850	2196
588	AT1G07280.1	AL1G17430.t1	0.0328121	0.203259	0.16143	NG	92.6	513	554	33	2	8	529	95.5	1	553	553	100	100	1	547	547	1.06e-285	786	2030
589	AT1G07290.1	AL1G17440.t1	0.101979	0.259106	0.393579	NG	79.9	302	378	48	5	28	321	84.9	1	355	355	100	100	1	373	373	1.84e-199	552	1423
590	AT1G07300.1	AL1G17450.t1	0.0138997	0.166925	0.0832695	NG	96.9	125	129	4	0	0	127	98.4	1	129	129	100	100	1	129	129	1.95e-83	239	611
591	AT1G07310.1	AL1G17460.t1	0.0155376	0.139755	0.111177	NG	94.9	335	353	15	1	3	340	96.3	1	353	353	100	100	1	350	350	7.78e-195	540	1390
592	AT1G07320.1	AL1G17470.t1	0.0207921	0.204772	0.101538	NG	94.7	268	283	15	0	0	273	96.5	1	283	283	100	100	1	283	283	1.02e-181	501	1289
593	AT1G07330.1	AL1G17480.t1	0.0553091	0.175332	0.315454	NG	74.9	576	769	91	10	102	601	78.2	1	686	686	100	100	1	750	750	0	998	2580
594	AT1G07340.1	AL1G17490.t1	0.0298943	0.111976	0.266972	NG	94.4	471	499	28	0	0	490	98.2	1	499	499	100	100	1	499	499	0	935	2417
595	AT1G07360.1	AL1G17510.t1	0.0192779	0.167572	0.115042	NG	88.2	425	482	57	0	0	431	89.4	1	482	482	100	100	1	482	482	1.82e-268	737	1902
596	AT1G07370.1	AL1G17520.t1	NA	0.150612	0	NG	100	264	264	0	0	0	264	100	1	264	264	100	100	1	264	264	2.11e-185	508	1309
597	AT1G07390.3	AL1G17550.t1	0.0362293	0.117516	0.308291	NG	78	845	1084	190	1	49	878	81	1	1084	1084	100	100	44	1078	1078	0	1209	3128
598	AT1G07410.1	AL1G17560.t1	NA	0.121456	0	NG	100	215	215	0	0	0	215	100	1	215	215	100	100	1	215	215	1.33e-150	416	1070
599	AT1G07420.1	AL1G17570.t1	0.0065126	0.112994	0.057637	NG	98.5	263	267	4	0	0	265	99.3	1	267	267	100	100	1	267	267	1.11e-202	552	1423
600	AT1G07430.1	AL1G17580.t1	0.0275956	0.222065	0.124268	NG	90	404	449	28	5	17	417	92.9	1	443	443	100	100	1	438	438	2.71e-286	778	2010
601	AT1G07440.1	AL1G17590.t1	0.0330263	0.150389	0.219606	NG	92.9	248	267	19	0	0	261	97.8	1	267	267	100	100	1	267	267	1.16e-179	494	1272
602	AT1G07460.2	AL1G17610.t1	0.0344473	0.232047	0.14845	NG	92	298	324	24	2	2	308	95.1	1	323	323	100	100	1	323	323	1.84e-204	561	1447
603	AT1G07473.1	AL1G17630.t1	0.0652365	0.152602	0.427494	NG	85.7	108	126	18	0	0	116	92.1	1	126	126	100	100	1	126	126	4.11e-70	206	523
604	AT1G07476.1	AL1G17640.t1	0.0996778	0.189411	0.52625	NG	73.6	103	140	37	0	0	108	77.1	44	183	183	76.5	76.5	1	140	140	1.81e-63	192	487
605	AT1G07480.1	AL1G17650.t1	0.0197925	0.156611	0.12638	NG	95.2	358	376	18	0	0	365	97.1	1	376	376	100	100	1	376	376	9.53e-252	686	1769
606	AT1G07485.1	AL1G17670.t1	0.0812601	0.312047	0.26041	NG	87.4	83	95	10	2	2	89	93.7	6	98	101	92.1	92.1	4	98	123	4.36e-51	156	395
607	AT1G07500.1	AL1G17680.t1	0.262125	1.1087	0.236425	NG	87.2	34	39	4	1	1	37	94.9	3	41	75	52	52	2	39	84	5.7e-21	78.2	191
608	AT1G07510.1	AL4G23650.t1	0.0907661	0.848435	0.106981	NG	82.3	673	818	135	7	10	726	88.8	1	814	814	100	100	2	813	813	0	1269	3284
609	AT1G07520.3	AL1G17700.t1	0.0187873	0.15806	0.118862	NG	90.7	646	712	46	6	20	658	92.4	1	697	697	100	100	1	707	707	0	1235	3196
610	AT1G07530.1	AL4G23620.t1	0.16944	0.831718	0.203723	NG	66	517	783	178	19	88	587	75	1	766	770	99.5	99.5	1	712	714	0	913	2359
611	AT1G07540.1	AL1G17720.t1	0.0200544	0.128746	0.155768	NG	92.6	584	631	45	2	2	591	93.7	1	631	631	100	100	1	629	629	0	1060	2740
612	AT1G07550.1	AL1G17730.t1	0.0431278	0.101578	0.42458	NG	85.8	628	732	61	2	43	660	90.2	137	865	865	84.3	84.3	1	692	692	0	1156	2991
613	AT1G07570.1	AL1G17750.t1	0.00860016	0.12942	0.0664516	NG	98.1	403	411	8	0	0	406	98.8	1	411	411	100	100	1	411	411	2.66e-294	796	2056
614	AT1G07590.1	AL1G17770.t1	0.0184777	0.195335	0.0945948	NG	95.2	511	537	24	2	2	520	96.8	1	535	535	100	100	1	537	537	0	991	2561
615	AT1G07615.1	AL1G17800.t1	0.0224965	0.175042	0.12852	NG	91.1	451	495	22	2	22	461	93.1	1	494	494	100	100	1	474	474	8.17e-305	859	2220
616	AT1G07620.2	AL1G17810.t1	0.0536274	0.163134	0.328732	NG	83.4	484	580	61	5	35	504	86.9	1	579	579	100	100	1	546	546	0	904	2335
617	AT1G07630.1	AL4G23420.t1	0.110805	0.930259	0.119112	NG	80.4	540	672	109	15	23	582	86.6	1	663	663	100	100	1	658	658	0	969	2506
618	AT1G07640.2	AL1G17830.t2	0.0262489	0.159157	0.164924	NG	89.6	301	336	24	6	11	306	91.1	1	332	332	100	100	1	329	329	1.56e-202	557	1436
619	AT1G07640.3	AL1G17830.t1	0.0269473	0.155272	0.17355	NG	89.2	307	344	26	6	11	312	90.7	1	340	340	100	100	1	337	337	5.45e-207	569	1467
620	AT1G07645.1	AL1G17850.t1	0.00955728	0.190519	0.0501644	NG	97.8	135	138	3	0	0	136	98.6	1	138	138	100	100	1	138	138	5.25e-99	280	715
621	AT1G07650.2	AL1G17840.t1	0.0268821	0.143868	0.186852	NG	91.1	931	1022	81	4	10	946	92.6	1	1021	1021	100	100	1	1013	1013	0	1512	3914
622	AT1G07660.1	AL1G17860.t1	NA	0.109586	0	NG	100	104	104	0	0	0	104	100	1	104	104	100	100	1	104	104	2.65e-67	197	500
623	AT1G07670.1	AL1G17870.t1	0.00704481	0.159783	0.04409	NG	98	1041	1062	16	1	5	1050	98.9	1	1062	1062	100	100	1	1057	1057	0	2028	5255
624	AT1G07680.1	AL1G17880.t1	0.0829537	0.151747	0.546657	NG	83	127	153	25	1	1	136	88.9	1	153	153	100	100	1	152	152	5.77e-85	245	626
625	AT1G07690.4	AL1G17890.t1	0.152011	0.17337	0.8768	NG	58.9	109	185	59	5	17	122	65.9	1	184	184	100	100	1	169	169	1.63e-38	129	325
626	AT1G07700.1	AL1G17900.t1	0.0486545	0.133784	0.363679	NG	91.1	184	202	14	2	4	187	92.6	7	205	205	97.1	97.1	58	258	258	2.82e-125	353	907
627	AT1G07705.2	AL1G17910.t1	0.0185977	0.0686917	0.270741	NG	95.6	589	616	26	1	1	600	97.4	1	615	615	100	100	1	616	616	0	1136	2938
628	AT1G07710.1	AL1G17920.t1	0.0158863	0.128427	0.123699	NG	94.3	513	544	30	1	1	518	95.2	1	544	544	100	100	1	543	543	1.91e-203	577	1487
629	AT1G07720.1	AL1G17930.t1	0.0162717	0.150289	0.108269	NG	96.5	462	479	17	0	0	474	99	1	479	479	100	100	1	479	479	0	934	2414
630	AT1G07725.1	AL1G17940.t1	0.0293856	0.14593	0.201368	NG	91.1	561	616	53	1	2	576	93.5	1	616	616	100	100	1	614	614	0	1065	2755
631	AT1G07730.2	AL1G17950.t1	0.0352875	0.14684	0.240312	NG	88.5	346	391	44	1	1	351	89.8	1	390	390	100	100	1	391	391	1.85e-189	529	1363
632	AT1G07740.1	AL1G17960.t1	0.0281299	0.142816	0.196966	NG	96.8	182	188	6	0	0	185	98.4	1	188	460	40.9	40.9	1	188	460	1.23e-122	365	936
633	AT1G07745.2	AL1G17970.t1	0.047829	0.16492	0.290014	NG	90.4	236	261	25	0	0	244	93.5	43	303	305	85.6	85.6	1	261	263	8.19e-166	461	1185
634	AT1G07747.1	AL1G18020.t1	0.0974047	0.270517	0.360069	NG	81.3	78	96	18	0	0	87	90.6	1	96	96	100	100	1	96	96	9.65e-55	164	416
635	AT1G07750.1	AL1G18030.t1	0.0279796	0.125281	0.223336	NG	94.1	336	357	21	0	0	345	96.6	1	357	357	100	100	1	357	357	4.4e-252	685	1767
636	AT1G07770.1	AL1G18060.t1	NA	0.179804	0	NG	100	131	131	0	0	0	131	100	1	131	131	100	100	1	131	131	7.92e-93	263	673
637	AT1G07780.1	AL6G15480.t1	0.0408727	0.190094	0.215013	NG	91.3	252	276	24	0	0	263	95.3	1	276	276	100	100	1	276	276	6.93e-181	498	1282
638	AT1G07795.1	AL1G18080.t1	0.00752385	0.258681	0.0290855	NG	98.3	117	119	2	0	0	118	99.2	1	119	119	100	100	1	119	119	3.12e-82	236	601
639	AT1G07830.1	AL1G18110.t1	0.0121462	0.186269	0.0652077	NG	96.6	140	145	4	1	1	140	96.6	1	145	145	100	100	1	144	144	1.79e-91	261	667
640	AT1G07840.1	AL1G18120.t1	0.0424796	0.110967	0.382812	NG	89.5	280	313	32	1	1	296	94.6	1	313	313	100	100	1	312	312	4.24e-191	527	1357
641	AT1G07850.1	AL1G18130.t1	0.00982408	0.204855	0.0479564	NG	97.6	527	540	12	1	1	528	97.8	1	539	542	99.4	99.4	1	540	542	0	1028	2657
642	AT1G07860.1	AL1G18140.t1	0.0270678	0.24686	0.109648	NG	84.6	121	143	12	2	10	123	86	1	136	136	100	100	1	140	140	7.14e-72	211	537
643	AT1G07870.1	AL1G18150.t1	0.011374	0.231188	0.0491979	NG	97.2	412	424	11	1	1	414	97.6	1	424	424	100	100	1	423	423	3.27e-299	810	2091
644	AT1G07880.2	AL1G18160.t1	0.0154105	0.19693	0.0782538	NG	96.7	350	362	12	0	0	357	98.6	1	362	364	99.5	99.5	1	362	364	1.14e-262	712	1838
645	AT1G07890.6	AL1G18170.t1	0.00874302	0.154613	0.0565478	NG	98	245	250	5	0	0	249	99.6	1	250	250	100	100	1	250	250	1.02e-185	508	1308
646	AT1G07900.1	AL1G18180.t1	0.0266333	0.299708	0.0888641	NG	84.4	162	192	28	2	2	164	85.4	1	191	191	100	100	1	191	191	1.55e-103	295	756
647	AT1G07910.2	AL1G18200.t1	0.023936	0.119415	0.200443	NG	91.5	1033	1129	59	3	37	1059	93.8	54	1178	1178	95.5	95.5	1	1096	1096	0	2034	5271
648	AT1G07920.1	AL1G18210.t1	0.000965359	0.14527	0.00664529	NG	100	450	450	0	0	0	450	100	1	450	450	100	100	1	450	450	0	901	2328
649	AT1G07950.1	AL1G18280.t1	0.0144963	0.218612	0.0663104	NG	96.1	122	127	5	0	0	125	98.4	26	152	155	81.9	81.9	29	155	157	3.21e-79	231	589
650	AT1G07960.1	AL1G18290.t1	0.0147946	0.135665	0.109053	NG	96.6	142	147	5	0	0	147	100	1	147	147	100	100	1	147	147	1.85e-101	286	733
651	AT1G07970.1	AL1G18300.t1	0.0279681	0.0934683	0.299226	NG	94.8	658	694	32	3	4	666	96	1	694	694	100	100	1	690	690	0	1237	3200
652	AT1G07980.1	AL1G18310.t1	0.0501606	0.134876	0.3719	NG	78.8	164	208	43	1	1	170	81.7	1	207	207	100	100	1	208	208	2.61e-96	278	712
653	AT1G07985.1	AL1G18320.t1	0.00896867	0.125055	0.0717179	NG	97.9	142	145	3	0	0	143	98.6	1	145	145	100	100	1	145	145	6.12e-81	234	598
654	AT1G07990.1	AL4G21680.t2	0.129813	0.672676	0.192979	NG	69.7	598	858	167	10	93	668	77.9	1	803	803	100	100	1	820	820	0	1061	2744
655	AT1G08010.1	AL1G18350.t1	0.0573185	0.176018	0.32564	NG	87	268	308	32	3	8	283	91.9	1	304	304	100	100	1	304	304	8.23e-187	515	1327
656	AT1G08030.1	AL1G18360.t1	0.0259608	0.135046	0.192236	NG	92.6	464	501	37	0	0	477	95.2	1	501	501	100	100	1	501	501	0	902	2330
657	AT1G08035.2	AL1G18370.t1	0.0399468	0.0546133	0.731449	NG	91.1	102	112	10	0	0	105	93.8	1	112	112	100	100	1	112	112	1.31e-73	213	543
658	AT1G08040.1	AL1G18380.t1	0.0123863	0.0799405	0.154944	NG	97.4	373	383	10	0	0	380	99.2	1	383	383	100	100	1	383	383	2.72e-291	786	2030
659	AT1G08050.1	AL1G18400.t1	0.0265124	0.121318	0.218536	NG	94.2	605	642	37	0	0	618	96.3	1	642	642	100	100	1	642	642	0	1155	2987
660	AT1G08060.3	AL1G18410.t1	0.0535299	0.0868114	0.616623	NG	82.9	1741	2101	247	17	113	1812	86.2	1	2003	2003	100	100	1	2086	2086	0	3006	7794
661	AT1G08065.1	AL1G18420.t1	0.0362456	0.119548	0.303189	NG	92.7	255	275	20	0	0	266	96.7	1	275	278	98.9	98.9	1	275	278	4.44e-194	531	1369
662	AT1G08070.1	AL1G18430.t1	0.024392	0.158372	0.154018	NG	94.6	702	742	40	0	0	725	97.7	1	742	742	100	100	1	742	742	0	1310	3391
663	AT1G08080.1	AL1G18440.t1	0.0279137	0.122252	0.228329	NG	94.6	261	276	15	0	0	267	96.7	1	276	276	100	100	1	276	276	2.02e-189	520	1338
664	AT1G08090.1	AL1G18450.t1	0.0141804	0.164175	0.0863736	NG	97.2	516	531	15	0	0	525	98.9	1	531	531	100	100	1	531	531	0	1041	2691
665	AT1G08110.4	AL1G18470.t1	0.018599	0.121361	0.153254	NG	96.2	227	236	9	0	0	228	96.6	1	236	236	100	100	1	236	236	3.38e-168	462	1190
666	AT1G08125.1	AL1G18500.t1	0.021694	0.115159	0.188382	NG	95	301	317	15	1	1	307	96.8	1	316	316	100	100	1	317	317	3.72e-219	598	1542
667	AT1G08130.1	AL1G18510.t1	0.0144694	0.140066	0.103304	NG	95.2	756	794	35	1	3	773	97.4	1	791	791	100	100	1	794	794	0	1418	3670
668	AT1G08135.1	AL1G18520.t1	0.0389092	0.147626	0.263567	NG	90.3	733	812	63	3	16	762	93.8	1	797	797	100	100	1	811	811	0	1446	3744
669	AT1G08140.1	AL1G18530.t1	0.0479613	0.0960364	0.499408	NG	90.2	739	819	80	0	0	784	95.7	1	819	819	100	100	1	819	819	0	1479	3830
670	AT1G08150.1	AL1G18550.t1	0.0348121	0.1054	0.330286	NG	92.9	749	806	57	0	0	780	96.8	11	816	816	98.8	98.8	3	808	808	0	1505	3897
671	AT1G08160.1	AL1G18560.t1	0.0141017	0.120317	0.117205	NG	97.3	218	224	4	1	2	219	97.8	1	222	222	100	100	1	224	224	1.89e-138	386	992
672	AT1G08170.1	AL1G18580.t1	0.0182581	0.19804	0.0921938	NG	74.2	181	244	24	3	39	184	75.4	1	244	244	100	100	1	205	205	3.09e-99	287	735
673	AT1G08180.1	AL1G18590.t1	0.0295134	0.0936306	0.315211	NG	86.6	97	112	15	0	0	99	88.4	1	112	112	100	100	1	112	112	4.2e-61	182	461
674	AT1G08190.1	AL1G18600.t1	0.00666052	0.095532	0.0697203	NG	98.3	964	981	14	2	3	971	99	1	981	981	100	100	1	978	978	0	1842	4770
675	AT1G08200.1	AL1G18610.t1	0.00222416	0.144407	0.015402	NG	99.5	388	390	2	0	0	389	99.7	1	390	390	100	100	1	390	390	1.47e-294	795	2053
676	AT1G08210.2	AL1G18620.t1	0.0117386	0.143502	0.0818009	NG	92.1	480	521	13	2	28	486	93.3	1	520	520	100	100	1	494	494	0	927	2397
677	AT1G08220.1	AL1G18630.t1	0.0340607	0.137253	0.248159	NG	92.4	254	275	21	0	0	263	95.6	1	275	275	100	100	1	275	275	5.75e-184	506	1302
678	AT1G08230.2	AL1G18640.t1	0.0270166	0.198087	0.136387	NG	90.1	408	453	23	3	22	414	91.4	1	452	452	100	100	157	588	588	1.35e-281	773	1996
679	AT1G08280.1	AL1G18680.t1	0.0221261	0.17093	0.129446	NG	94.2	376	399	18	3	5	386	96.7	1	399	399	100	100	1	394	394	3.62e-271	736	1901
680	AT1G08290.1	AL1G18690.t1	0.0243017	0.132776	0.183028	NG	90.3	307	340	19	4	14	313	92.1	1	338	338	100	100	4	331	331	1.09e-227	621	1602
681	AT1G08300.2	AL1G18700.t1	0.0872647	0.200431	0.435384	NG	84.4	384	455	68	3	3	412	90.5	1	453	657	68.9	68.9	1	454	467	4.77e-260	722	1864
682	AT1G08310.1	AL1G18720.t1	0.0383711	0.151667	0.252996	NG	91.6	285	311	26	0	0	298	95.8	1	311	316	98.4	98.4	1	311	312	1.08e-219	599	1545
683	AT1G08315.1	AL1G18730.t1	0.0143174	0.142953	0.100154	NG	96.9	308	318	10	0	0	313	98.4	9	326	326	97.5	97.5	1	318	318	2.11e-205	564	1453
684	AT1G08320.1	AL1G18740.t1	0.00455138	0.0977984	0.0465384	NG	94.6	459	485	22	2	4	462	95.3	1	482	482	100	100	1	484	484	1.52e-305	841	2172
685	AT1G08340.1	AL1G18750.t1	0.015647	0.146398	0.10688	NG	94.4	323	342	7	1	12	327	95.6	1	330	332	99.4	99.4	1	342	348	2.57e-201	555	1430
686	AT1G08350.2	AL1G18760.t1	0.0323696	0.156881	0.206333	NG	93.4	551	590	39	0	0	567	96.1	1	590	590	100	100	1	590	590	0	1089	2817
687	AT1G08360.1	AL1G18770.t1	0.00792668	0.1576	0.0502962	NG	98.6	214	217	3	0	0	216	99.5	1	217	217	100	100	1	217	217	1.49e-148	411	1057
688	AT1G08370.1	AL1G18780.t1	0.0229448	0.0768257	0.298661	NG	91.8	337	367	29	1	1	342	93.2	1	366	368	99.5	99.5	1	367	369	1.19e-232	637	1642
689	AT1G08380.1	AL1G18790.t1	0.0418667	0.257122	0.162828	NG	99.1	113	114	1	0	0	114	100	28	141	141	80.9	80.9	12	125	125	4.82e-84	241	616
690	AT1G08390.1	AL1G18800.t1	0.0429275	0.161389	0.265987	NG	91.3	126	138	11	1	1	132	95.7	1	138	138	100	100	1	137	137	4.86e-88	252	643
691	AT1G08400.1	AL1G18810.t1	0.0303305	0.113724	0.266703	NG	93.4	753	806	52	1	1	784	97.3	1	805	805	100	100	1	806	806	0	1513	3918
692	AT1G08410.1	AL1G18820.t1	0.0157241	0.139968	0.112341	NG	95.9	566	590	18	1	6	573	97.1	1	590	590	100	100	1	584	584	0	1088	2815
693	AT1G08420.1	AL1G18830.t1	0.00262664	0.100892	0.026034	NG	94.1	988	1050	30	2	32	988	94.1	1	1019	1019	100	100	1	1049	1049	0	1874	4854
694	AT1G08430.1	AL1G18840.t1	0.0261995	0.114345	0.229127	NG	93.2	454	487	22	4	11	468	96.1	1	486	494	98.4	98.4	1	477	491	2.01e-305	849	2193
695	AT1G08440.1	AL1G18850.t1	0.0246728	0.123158	0.200334	NG	93.5	471	504	29	2	4	482	95.6	1	502	502	100	100	1	502	502	0	873	2256
696	AT1G08450.1	AL1G18860.t1	0.0100192	0.15966	0.0627534	NG	97.2	413	425	11	1	1	416	97.9	1	425	425	100	100	1	424	424	2.25e-263	719	1856
697	AT1G08460.1	AL1G18880.t1	0.0225213	0.180241	0.124951	NG	94.7	358	378	20	0	0	369	97.6	1	378	378	100	100	17	394	394	7.7e-272	737	1903
698	AT1G08465.1	AL1G18890.t1	0.0141996	0.149478	0.0949945	NG	96.8	179	185	6	0	0	182	98.4	1	185	185	100	100	1	185	185	1e-128	358	920
699	AT1G08470.1	AL1G18900.t1	0.0122325	0.146252	0.0836403	NG	97.4	381	391	10	0	0	388	99.2	1	391	391	100	100	1	391	391	2.83e-288	779	2012
700	AT1G08480.1	AL1G18910.t1	0.0123175	0.120805	0.101962	NG	97.2	139	143	4	0	0	142	99.3	1	143	143	100	100	1	143	143	2.03e-103	291	745
701	AT1G08490.1	AL1G18920.t1	0.0115079	0.129961	0.0885488	NG	96.6	452	468	11	2	5	459	98.1	1	464	464	100	100	1	467	467	0	879	2272
702	AT1G08500.1	AL1G18930.t1	0.0308859	0.10243	0.301531	NG	91.3	211	231	15	3	5	216	93.5	1	229	229	100	100	1	228	228	8.09e-145	403	1035
703	AT1G08510.1	AL1G18940.t1	0.00533647	0.138427	0.0385506	NG	98.5	407	413	5	1	1	410	99.3	1	413	413	100	100	1	412	412	5.04e-302	816	2107
704	AT1G08520.1	AL1G18950.t1	0.00469283	0.10838	0.0432998	NG	98.4	749	761	8	1	4	755	99.2	1	761	761	100	100	1	757	757	0	1317	3409
705	AT1G08530.1	AL1G18960.t1	0.0298674	0.183541	0.162728	NG	93.4	242	259	15	1	2	250	96.5	1	257	258	99.6	99.6	1	259	263	3.39e-155	432	1110
706	AT1G08540.1	AL1G18970.t1	0.00841589	0.121361	0.0693458	NG	98.3	563	573	10	0	0	567	99	1	573	573	100	100	1	573	573	0	1058	2737
707	AT1G08550.1	AL1G18980.t1	0.0104232	0.186846	0.0557851	NG	94.4	437	463	19	2	7	443	95.7	1	463	463	100	100	1	456	456	2.22e-305	848	2192
708	AT1G08560.1	AL1G18990.t1	0.0137186	0.159956	0.0857649	NG	97.1	302	311	9	0	0	308	99	1	311	311	100	100	1	311	311	2.14e-197	543	1398
709	AT1G08570.1	AL1G19000.t1	0.0264178	0.157317	0.167927	NG	93.2	261	280	15	2	4	268	95.7	1	276	276	100	100	1	280	280	7e-191	523	1348
710	AT1G08580.1	AL1G19010.t1	0.0353767	0.216991	0.163033	NG	88.7	110	124	14	0	0	113	91.1	1	124	124	100	100	1	124	124	3.13e-64	191	484
711	AT1G08590.1	AL1G19020.t1	0.0212752	0.152755	0.139277	NG	94.6	975	1031	55	1	1	988	95.8	1	1030	1030	100	100	1	1031	1031	8.39e-305	903	2334
712	AT1G08600.1	AL1G19030.t1	0.0333198	0.105308	0.316403	NG	90.6	1344	1483	101	4	38	1370	92.4	8	1455	1459	99.2	99.2	3	1482	1484	0	2451	6353
713	AT1G08610.1	AL1G19040.t1	0.0303071	0.186307	0.162673	NG	84.4	141	167	11	4	15	145	86.8	1	159	560	28.4	28.4	1	160	561	1.15e-83	271	692
714	AT1G08620.1	AL1G19050.t2	0.0327444	0.0939953	0.348362	NG	91.5	1124	1228	85	3	19	1166	95	1	1210	1210	100	100	1	1227	1227	0	2239	5803
715	AT1G08630.1	AL1G19060.t1	0.0110253	0.106554	0.103472	NG	97.8	349	357	8	0	0	355	99.4	1	357	359	99.4	99.4	1	357	359	4.6e-255	692	1787
716	AT1G08640.1	AL1G19070.t1	0.0210718	0.10278	0.205019	NG	94.3	282	299	13	1	4	288	96.3	1	295	295	100	100	1	299	299	6.95e-196	538	1385
717	AT1G08650.1	AL1G19090.t1	0.0124122	0.153153	0.0810447	NG	97.2	277	285	8	0	0	280	98.2	1	285	285	100	100	1	285	285	3.43e-206	563	1450
718	AT1G08660.1	AL1G19100.t1	0.00820656	0.0968098	0.08477	NG	98.3	467	475	8	0	0	473	99.6	1	475	475	100	100	1	475	475	0	959	2478
719	AT1G08670.1	AL1G19120.t1	0.0337649	0.149212	0.226288	NG	93.5	216	231	15	0	0	221	95.7	1	231	232	99.6	99.6	1	231	234	1.64e-153	425	1093
720	AT1G08680.4	AL1G19130.t1	0.0470485	0.0796937	0.590366	NG	88.8	525	591	60	2	6	539	91.2	66	652	652	90	90	1	589	589	0	988	2553
721	AT1G08700.1	AL1G19140.t1	0.0228109	0.226648	0.100645	NG	93.7	433	462	20	2	9	445	96.3	1	454	454	100	100	1	461	461	4.86e-293	797	2058
722	AT1G08710.1	AL1G19150.t1	0.057576	0.186745	0.308314	NG	87.6	241	275	31	2	3	258	93.8	1	275	275	100	100	1	272	272	3.96e-149	417	1073
723	AT1G08720.1	AL1G19160.t1	0.02979	0.124374	0.23952	NG	92.8	871	939	60	3	8	894	95.2	1	934	934	100	100	1	936	936	0	1683	4358
724	AT1G08750.1	AL1G19180.t1	0.0252877	0.154214	0.163978	NG	93.3	364	390	18	2	8	372	95.4	1	389	389	100	100	1	383	383	7.95e-256	697	1798
725	AT1G08760.1	AL1G19190.t1	0.0349248	0.157621	0.221575	NG	92	694	754	53	2	7	722	95.8	1	749	749	100	100	1	752	752	0	1261	3264
726	AT1G08770.1	AL1G19200.t1	0.0185937	0.181773	0.102291	NG	92.9	196	211	14	1	1	200	94.8	1	210	210	100	100	1	211	211	1.73e-121	342	878
727	AT1G08780.1	AL1G19210.t1	0.0194507	0.311635	0.0624149	NG	95.4	124	130	6	0	0	128	98.5	1	130	130	100	100	1	130	130	5.8e-81	233	595
728	AT1G08790.1	AL1G19220.t1	0.0116163	0.119081	0.0975502	NG	97.4	186	191	5	0	0	189	99	1	191	191	100	100	1	191	191	4.16e-124	347	891
729	AT1G08800.1	AL1G19230.t1	0.0577593	0.173665	0.33259	NG	88	979	1113	132	2	2	1032	92.7	1	1112	1114	99.8	99.8	13	1124	1126	0	1745	4520
730	AT1G08810.1	AL1G19240.t1	0.0214479	0.126446	0.169622	NG	94.3	266	282	13	3	3	275	97.5	1	281	281	100	100	1	280	280	3.13e-177	489	1259
731	AT1G08820.1	AL1G19250.t1	0.0237704	0.0818119	0.290549	NG	90.4	293	324	19	3	12	299	92.3	70	387	387	82.2	82.2	1	318	318	3.03e-186	518	1334
732	AT1G08830.1	AL1G19260.t2	0.0270654	0.171462	0.157851	NG	97.9	143	146	3	0	0	144	98.6	1	146	153	95.4	95.4	1	146	181	7.95e-103	291	746
733	AT1G08840.3	AL1G19270.t1	0.0182182	0.106609	0.170889	NG	95.7	1277	1334	52	2	5	1297	97.2	1	1332	1332	100	100	1	1331	1331	0	2486	6443
734	AT1G08845.1	AL1G19280.t1	0.00924495	0.0971768	0.0951354	NG	97.9	186	190	4	0	0	188	98.9	1	190	190	100	100	1	190	190	1.93e-133	371	952
735	AT1G08860.1	AL1G19290.t1	0.0174556	0.114915	0.1519	NG	95.7	560	585	23	1	2	574	98.1	1	585	585	100	100	1	583	583	0	1106	2860
736	AT1G08880.1	AL1G19310.t1	0.0063612	0.184109	0.0345514	NG	98.6	141	143	2	0	0	142	99.3	1	143	143	100	100	1	143	143	5.57e-92	262	670
737	AT1G08890.1	AL1G19320.t1	0.0123741	0.138218	0.0895261	NG	97	452	466	13	1	1	460	98.7	1	465	465	100	100	1	466	466	0	878	2268
738	AT1G08900.1	AL1G19330.t1	0.0271192	0.17204	0.157633	NG	83.5	435	521	27	2	59	449	86.2	1	463	463	100	100	1	520	520	5.36e-300	817	2111
739	AT1G08910.1	AL1G19340.t1	0.0643556	0.118044	0.545181	NG	80	704	880	107	7	69	735	83.5	1	830	830	100	100	1	861	861	0	1107	2864
740	AT1G08920.2	AL1G19350.t1	0.0102681	0.0964808	0.106426	NG	96.4	461	478	10	1	7	465	97.3	1	478	478	100	100	1	471	471	0	901	2328
741	AT1G08930.1	AL1G19360.t1	0.00440396	0.104253	0.0422429	NG	99	492	497	5	0	0	496	99.8	1	497	497	100	100	1	497	497	0	960	2481
742	AT1G08940.1	AL1G19370.t1	0.0153577	0.178933	0.0858293	NG	95.7	269	281	11	1	1	275	97.9	1	281	282	99.6	99.6	1	280	282	2.92e-201	550	1417
743	AT1G08960.1	AL1G19390.t1	0.0106591	0.153386	0.069492	NG	96.4	528	548	17	2	3	532	97.1	1	547	547	100	100	1	546	546	0	981	2537
744	AT1G08970.1	AL1G19400.t1	0.0074747	0.189604	0.0394226	NG	97.8	227	232	5	0	0	229	98.7	1	232	232	100	100	1	232	232	2.57e-129	364	934
745	AT1G08980.1	AL1G19410.t1	0.0126871	0.12142	0.104489	NG	97.2	414	426	12	0	0	418	98.1	1	426	426	100	100	1	426	426	1.62e-298	808	2087
746	AT1G08990.1	AL1G19420.t1	0.0307814	0.142634	0.215807	NG	94.1	497	528	31	0	0	508	96.2	40	567	567	93.1	93.1	1	528	528	0	1029	2660
747	AT1G09000.1	AL1G65470.t1	0.127901	0.596032	0.214588	NG	74.7	502	672	146	4	24	558	83	1	667	667	100	100	1	653	653	0	942	2436
748	AT1G09010.1	AL1G19440.t2	0.019831	0.143652	0.138049	NG	95.2	904	950	41	1	5	926	97.5	1	945	945	100	100	1	950	950	0	1895	4909
749	AT1G09020.1	AL1G19450.t1	0.00277042	0.100108	0.0276742	NG	97.7	477	488	3	1	8	480	98.4	1	488	488	100	100	1	480	480	0	958	2476
750	AT1G09030.1	AL1G19470.t1	0.00921161	0.0827741	0.111286	NG	97.9	137	140	3	0	0	138	98.6	1	140	140	100	100	1	140	140	3.26e-94	268	684
751	AT1G09040.1	AL1G19480.t1	0.0560813	0.140492	0.399177	NG	86.7	805	929	105	5	19	841	90.5	1	912	912	100	100	1	927	927	0	1512	3915
752	AT1G09060.1	AL1G19500.t1	0.0322653	0.131663	0.24506	NG	92.4	860	931	63	2	8	889	95.5	1	931	931	100	100	1	923	923	0	1727	4473
753	AT1G09070.1	AL1G19510.t1	0.0165989	0.160716	0.103281	NG	95.8	296	309	12	1	1	302	97.7	1	308	325	94.8	94.8	1	309	324	1.46e-167	468	1205
754	AT1G09130.1	AL1G19570.t1	0.00673166	0.179835	0.0374324	NG	98.5	324	329	5	0	0	326	99.1	1	329	331	99.4	99.4	1	329	333	3.51e-234	637	1644
755	AT1G09140.2	AL1G19580.t1	0.0379711	0.113988	0.333116	NG	93	238	256	18	0	0	241	94.1	1	256	257	99.6	99.6	1	256	260	1.73e-140	394	1013
756	AT1G09140.3	AL1G19580.t3	0.0408661	0.113474	0.360136	NG	92	229	249	20	0	0	232	93.2	1	249	249	100	100	1	249	249	1.74e-133	376	965
757	AT1G09150.1	AL1G19590.t1	0.00717846	0.104444	0.0687304	NG	98.4	179	182	3	0	0	181	99.5	1	182	182	100	100	1	182	182	1.67e-130	363	931
758	AT1G09155.1	AL1G19600.t1	0.0388035	0.183153	0.211864	NG	91	262	288	23	2	3	272	94.4	1	285	290	98.3	98.3	1	288	290	1.56e-184	508	1309
759	AT1G09160.1	AL1G19620.t1	0.0156328	0.124232	0.125835	NG	96.7	415	429	14	0	0	421	98.1	1	429	429	100	100	1	429	429	9.07e-302	816	2109
760	AT1G09170.1	AL1G19630.t1	0.0359367	0.150658	0.238531	NG	87.8	931	1060	75	8	54	978	92.3	1	1011	1011	100	100	1	1055	1055	0	1696	4392
761	AT1G09176.1	AL1G19640.t1	0.0936173	0.276613	0.338441	NG	71.1	106	149	28	3	15	113	75.8	10	151	151	94	94	1	141	141	1.47e-32	112	280
762	AT1G09190.1	AL1G19660.t1	0.0291094	0.195488	0.148906	NG	89.6	433	483	50	0	0	449	93	1	483	485	99.6	99.6	1	483	493	6.11e-289	789	2038
763	AT1G09195.10	AL1G19670.t1	0.0286889	0.185757	0.154443	NG	93.4	513	549	33	2	3	535	97.4	1	546	546	100	100	1	549	549	0	983	2540
764	AT1G09200.1	AL1G19680.t1	NA	0.303436	0	NG	100	137	137	0	0	0	137	100	1	137	137	100	100	1	137	137	3.84e-87	249	637
765	AT1G09210.1	AL1G19700.t2	0.0206075	0.193863	0.106299	NG	93.4	397	425	28	0	0	406	95.5	1	425	425	100	100	1	425	425	6.26e-224	619	1597
766	AT1G09220.1	AL1G19710.t1	0.0205166	0.153421	0.133728	NG	90.3	306	339	33	0	0	316	93.2	167	505	505	67.1	67.1	1	339	339	2.4e-225	623	1606
767	AT1G09230.1	AL1G19720.t1	0.0258829	0.10855	0.238441	NG	88.5	392	443	47	1	4	401	90.5	1	443	443	100	100	1	439	439	3.94e-270	738	1904
768	AT1G09240.1	AL1G19730.t1	0.0231212	0.116383	0.198664	NG	95.3	306	321	15	0	0	313	97.5	1	321	321	100	100	1	321	321	1.8e-226	617	1591
769	AT1G09250.1	AL1G19750.t1	0.0213053	0.233943	0.0910704	NG	91.9	194	211	10	3	7	201	95.3	1	208	208	100	100	1	207	207	6.29e-118	333	854
770	AT1G09270.1	AL1G19760.t1	0.0135241	0.133621	0.101213	NG	96.7	522	540	16	2	2	530	98.1	1	539	539	100	100	1	539	539	0	879	2272
771	AT1G09280.1	AL1G19770.t1	0.0187627	0.112078	0.167408	NG	95.1	559	588	23	1	6	569	96.8	1	582	582	100	100	1	588	588	0	1150	2975
772	AT1G09290.1	AL1G19780.t1	0.0474087	0.0960761	0.493449	NG	90.5	316	349	33	0	0	331	94.8	1	349	349	100	100	1	349	349	1.01e-221	607	1566
773	AT1G09300.1	AL1G19790.t1	0.0249943	0.124893	0.200127	NG	97	460	474	12	1	2	466	98.3	1	472	494	95.5	95.5	1	474	483	0	922	2383
774	AT1G09310.1	AL1G19800.t1	0.00242501	0.0853459	0.0284139	NG	98.8	164	166	1	1	1	164	98.8	1	165	180	91.7	91.7	1	166	181	2.76e-101	289	739
775	AT1G09320.1	AL1G19810.t1	0.0226598	0.16796	0.134912	NG	94.6	488	516	24	3	4	500	96.9	3	518	518	99.6	99.6	8	519	519	0	941	2433
776	AT1G09330.1	AL1G19820.t1	NA	0.138187	0	NG	100	187	187	0	0	0	187	100	1	187	187	100	100	1	187	187	1.04e-131	366	940
777	AT1G09340.1	AL1G19830.t1	0.00917535	0.113302	0.0809816	NG	97.9	371	379	8	0	0	377	99.5	1	379	379	100	100	1	379	379	1.27e-278	754	1946
778	AT1G09350.1	AL1G19860.t1	0.0153648	0.16183	0.0949445	NG	96.4	323	335	12	0	0	330	98.5	1	335	335	100	100	1	335	335	8.23e-255	690	1780
779	AT1G09370.1	AL1G19880.t1	0.0551069	0.0933492	0.590331	NG	88.1	156	177	21	0	0	167	94.4	1	177	177	100	100	1	177	177	1.41e-106	302	773
780	AT1G09380.1	AL1G19890.t1	0.0141922	0.103706	0.136851	NG	93.4	351	376	24	1	1	355	94.4	1	375	375	100	100	1	376	376	1.48e-241	660	1702
781	AT1G09390.1	AL1G19900.t1	0.0294042	0.184098	0.159721	NG	93.5	347	371	24	0	0	362	97.6	1	371	371	100	100	1	371	371	5.65e-262	711	1835
782	AT1G09400.1	AL1G19910.t1	0.0354762	0.223266	0.158896	NG	92	288	313	25	0	0	302	96.5	12	324	325	96.3	96.3	1	313	340	3.36e-223	610	1572
783	AT1G09415.1	AL1G19930.t1	0.0162097	0.108183	0.149836	NG	96.2	100	104	4	0	0	101	97.1	10	113	113	92	92	1	104	104	1.97e-60	180	456
784	AT1G09420.2	AL1G19940.t1	0.0341766	0.115043	0.297077	NG	93.2	519	557	27	2	11	528	94.8	1	557	636	87.6	87.6	1	546	559	0	1012	2616
785	AT1G09430.1	AL1G19950.t1	0.00413216	0.170696	0.0242076	NG	99.1	421	425	4	0	0	423	99.5	1	425	425	100	100	1	425	425	6.47e-305	834	2155
786	AT1G09440.1	AL1G19960.t1	0.0179647	0.1128	0.159261	NG	96.3	448	465	16	1	1	455	97.8	1	465	467	99.6	99.6	1	464	466	0	868	2243
787	AT1G09450.1	AL1G19970.t1	0.0303314	0.132775	0.228442	NG	91.8	551	600	37	1	12	564	94	1	600	600	100	100	1	588	588	0	1082	2799
788	AT1G09460.1	AL1G19980.t1	0.032425	0.101965	0.318003	NG	93.7	284	303	18	1	1	289	95.4	29	331	331	91.5	91.5	29	330	330	8.74e-158	444	1142
789	AT1G09470.1	AL1G19990.t1	0.0246029	0.110958	0.221731	NG	91.4	308	337	29	0	0	313	92.9	1	337	337	100	100	1	337	337	4.03e-157	443	1139
790	AT1G09490.1	AL1G20010.t1	0.0302865	0.130867	0.231429	NG	93.8	303	323	20	0	0	315	97.5	1	323	323	100	100	1	323	323	5.28e-220	601	1549
791	AT1G09500.1	AL1G20020.t1	0.0522622	0.148204	0.352636	NG	89.3	291	326	35	0	0	308	94.5	1	326	326	100	100	1	326	326	9.26e-211	578	1489
792	AT1G09510.1	AL1G20030.t2	0.0306179	0.141463	0.216438	NG	94.4	305	323	18	0	0	311	96.3	1	323	323	100	100	1	323	323	8.38e-217	593	1528
793	AT1G09520.1	AL1G20040.t1	0.084812	0.174288	0.486621	NG	83.8	222	265	39	3	4	233	87.9	1	261	261	100	100	1	265	265	1.55e-129	367	942
794	AT1G09530.1	AL1G20050.t1	0.0329667	0.175713	0.187617	NG	82.1	440	536	77	8	19	452	84.3	1	525	525	100	100	1	528	528	3.57e-286	785	2028
795	AT1G09540.1	AL1G20060.t1	0.0213292	0.137349	0.155292	NG	94.3	348	369	18	2	3	359	97.3	1	367	367	100	100	1	368	368	5.61e-258	701	1808
796	AT1G09550.1	AL1G20070.t1	0.0403441	0.121443	0.332207	NG	89.6	353	394	34	3	7	368	93.4	1	389	389	100	100	1	392	392	1.04e-260	709	1831
797	AT1G09560.1	AL1G20080.t1	0.0154933	0.133262	0.116262	NG	95.5	210	220	10	0	0	212	96.4	1	220	220	100	100	1	220	220	4.41e-147	408	1048
798	AT1G09570.1	AL1G20090.t1	0.00542735	0.124275	0.0436721	NG	98.8	1109	1123	14	0	0	1120	99.7	1	1123	1123	100	100	1	1123	1123	0	2196	5690
799	AT1G09575.1	AL1G20100.t1	0.0250633	0.128825	0.194553	NG	93.3	264	283	18	1	1	272	96.1	12	293	293	96.2	96.2	1	283	283	1.36e-184	508	1309
800	AT1G09580.1	AL1G20110.t1	0.0144175	0.138007	0.104469	NG	94.9	205	216	7	1	4	209	96.8	3	218	218	99.1	99.1	1	212	212	7.18e-146	404	1039
801	AT1G09590.1	AL1G20240.t1	0.00399577	0.202326	0.0197491	NG	99.4	164	165	1	0	0	164	99.4	1	165	165	100	100	1	165	165	5.99e-118	330	845
802	AT1G09600.1	AL1G20130.t1	0.0274298	0.0922082	0.297476	NG	93.4	668	715	47	0	0	687	96.1	1	715	715	100	100	1	715	715	0	1268	3281
803	AT1G09610.1	AL1G20140.t1	0.0234064	0.104317	0.224378	NG	94.7	268	283	15	0	0	276	97.5	1	283	283	100	100	1	283	283	5.22e-200	547	1409
804	AT1G09620.1	AL1G57770.t1	0.0654589	0.338632	0.193304	NG	79	916	1160	141	6	103	977	84.2	1	1090	1092	99.8	99.8	1	1127	1129	0	1820	4715
805	AT1G09625.1	AL1G20160.t1	0.110061	0.221487	0.496916	NG	74	57	77	15	2	5	62	80.5	1	75	75	100	100	1	74	74	1.49e-28	97.1	240
806	AT1G09630.1	AL1G20170.t1	0.0060507	0.104929	0.0576646	NG	98.6	215	218	3	0	0	217	99.5	1	218	218	100	100	1	218	218	1.61e-148	411	1057
807	AT1G09640.1	AL1G20180.t1	0.0151538	0.150236	0.100867	NG	96.6	401	415	14	0	0	407	98.1	1	415	415	100	100	1	415	415	1.27e-294	797	2059
808	AT1G09645.1	AL1G20190.t1	0.0169408	0.228309	0.0742011	NG	95.3	102	107	4	1	1	105	98.1	1	107	107	100	100	1	106	106	6.19e-65	191	485
809	AT1G09650.1	AL1G20200.t1	0.0693924	0.104627	0.663236	NG	82.6	318	385	55	5	12	338	87.8	1	383	383	100	100	1	375	375	1.15e-233	640	1651
810	AT1G09660.1	AL1G20210.t2	0.016178	0.161299	0.100298	NG	97.6	289	296	7	0	0	292	98.6	1	296	299	99	99	56	351	354	8.39e-209	573	1476
811	AT1G09665.1	AL1G20220.t1	0.0612961	0.25079	0.244412	NG	96.1	147	153	6	0	0	151	98.7	1	153	166	92.2	92.2	1	153	176	1.32e-101	289	739
812	AT1G09680.1	AL1G20230.t1	0.0356238	0.164624	0.216395	NG	89.2	247	277	28	2	2	255	92.1	1	276	608	45.4	45.4	1	276	608	1.74e-161	475	1222
813	AT1G09700.2	AL1G20250.t1	0.0529318	0.135797	0.389785	NG	90.1	247	274	27	0	0	261	95.3	1	274	280	97.9	97.9	1	274	377	2.33e-174	486	1250
814	AT1G09710.2	AL1G20260.t1	0.0522368	0.0956505	0.546122	NG	77.4	513	663	92	3	58	538	81.1	7	651	651	99.1	99.1	5	627	627	0	909	2349
815	AT1G09720.1	AL2G18180.t1	0.174446	0.761207	0.229171	NG	65.1	631	970	281	16	58	730	75.3	1	923	929	99.4	99.4	1	959	960	0	1078	2789
816	AT1G09730.1	AL1G20280.t1	0.0387747	0.101832	0.380771	NG	87.8	846	964	74	6	44	877	91	6	960	964	99.1	99.1	2	930	932	0	1525	3949
817	AT1G09740.1	AL1G20290.t1	0.00776179	0.1808	0.0429303	NG	98.3	169	172	3	0	0	172	100	1	172	172	100	100	1	172	172	8.72e-119	332	852
818	AT1G09750.1	AL1G20300.t1	0.0141511	0.153735	0.0920489	NG	94.9	428	451	21	2	2	434	96.2	1	450	450	100	100	1	450	450	3.19e-292	794	2051
819	AT1G09760.1	AL1G20310.t1	0.0123567	0.11007	0.112262	NG	95.2	238	250	12	0	0	240	96	1	250	250	100	100	1	250	250	2.91e-160	444	1141
820	AT1G09770.1	AL1G20320.t1	0.010323	0.0898384	0.114907	NG	97.6	825	845	20	0	0	834	98.7	1	845	845	100	100	1	845	845	0	1536	3976
821	AT1G09780.1	AL1G20330.t1	0.00707859	0.115121	0.0614884	NG	98.4	549	558	9	0	0	555	99.5	1	558	558	100	100	1	558	558	0	1117	2888
822	AT1G09790.2	AL1G20350.t1	0.0236677	0.159738	0.148166	NG	95.2	395	415	20	0	0	401	96.6	1	415	444	93.5	93.5	1	415	446	2.17e-305	835	2156
823	AT1G09795.1	AL1G20370.t3	0.0374115	0.144041	0.259728	NG	91.8	381	415	29	2	5	391	94.2	1	414	414	100	100	1	411	411	9.36e-266	724	1869
824	AT1G09800.1	AL1G20380.t1	0.0191653	0.102882	0.186284	NG	95.7	358	374	15	1	1	364	97.3	1	373	373	100	100	1	374	374	1.88e-259	705	1819
825	AT1G09810.1	AL1G20390.t1	0.0486813	0.119923	0.405937	NG	87.7	422	481	47	2	12	440	91.5	1	469	471	99.6	99.6	1	481	483	1.36e-302	823	2125
826	AT1G09812.1	AL1G20400.t1	0.0135643	0.0477674	0.283966	NG	96.9	125	129	4	0	0	128	99.2	1	129	129	100	100	1	129	129	3.01e-87	249	636
827	AT1G09815.1	AL1G20410.t1	0.0178808	0.160558	0.111367	NG	94.4	118	125	5	1	2	120	96	1	125	125	100	100	1	123	123	1.86e-81	234	597
828	AT1G09820.1	AL1G20420.t1	0.0301156	0.153946	0.195624	NG	94.9	576	607	31	0	0	587	96.7	1	607	607	100	100	1	607	607	1.08e-199	572	1475
829	AT1G09830.1	AL1G20430.t1	0.0160726	0.136684	0.117589	NG	92.9	496	534	34	3	4	506	94.8	1	533	533	100	100	1	531	531	0	934	2413
830	AT1G09840.1	AL1G20440.t1	0.00206588	0.142097	0.0145386	NG	99.5	420	422	2	0	0	421	99.8	1	422	422	100	100	1	422	422	1.37e-305	846	2185
831	AT1G09850.1	AL1G20450.t1	0.0208707	0.177702	0.117448	NG	95.4	418	438	20	0	0	427	97.5	1	438	438	100	100	1	438	438	1.08e-305	837	2163
832	AT1G09860.1	AL1G20460.t1	0.0260613	0.152461	0.170937	NG	92.2	354	384	28	1	2	360	93.8	1	384	384	100	100	1	382	382	1.92e-250	683	1762
833	AT1G09870.1	AL1G20470.t1	0.00715998	0.0977235	0.0732677	NG	98.6	481	488	7	0	0	484	99.2	1	488	488	100	100	1	488	488	0	968	2503
834	AT1G09880.2	AL1G20480.t1	0.0236019	0.146783	0.160795	NG	94.7	631	666	34	1	1	651	97.7	33	698	698	95.4	95.4	1	665	665	0	1319	3414
835	AT1G09890.3	AL1G20490.t1	0.0119516	0.155749	0.0767365	NG	93.8	617	658	17	1	24	629	95.6	1	658	658	100	100	1	634	634	0	1294	3349
836	AT1G09900.1	AL1G20500.t1	0.0167223	0.159707	0.104706	NG	93.6	221	236	15	0	0	229	97	1	236	599	39.4	39.4	1	236	599	2.79e-84	275	702
837	AT1G09910.1	AL1G20510.t1	0.0197625	0.131153	0.150683	NG	95.7	647	676	29	0	0	660	97.6	1	676	676	100	100	1	676	676	0	1384	3582
838	AT1G09920.1	AL1G20520.t1	0.0100885	0.133276	0.0756957	NG	95.9	189	197	4	1	4	191	97	1	193	193	100	100	1	197	197	3.43e-143	396	1017
839	AT1G09930.1	AL1G20530.t1	0.0121937	0.125265	0.0973432	NG	97.7	718	735	17	0	0	730	99.3	1	735	735	100	100	1	735	735	0	1462	3786
840	AT1G09932.1	AL1G20540.t1	0.0383139	0.16956	0.22596	NG	92.2	238	258	19	1	1	247	95.7	1	258	261	98.9	98.9	1	257	260	3.59e-173	477	1228
841	AT1G09935.1	AL1G20550.t1	0.0245673	0.120747	0.203461	NG	96.1	224	233	8	1	1	228	97.9	1	232	232	100	100	5	237	237	3.74e-162	447	1150
842	AT1G09940.1	AL1G20570.t1	0.0207211	0.154403	0.134201	NG	94.7	504	532	22	4	6	514	96.6	1	531	531	100	100	1	527	527	0	943	2438
843	AT1G09950.1	AL1G20580.t1	0.0327697	0.136917	0.239341	NG	91.9	216	235	15	1	4	224	95.3	1	231	231	100	100	1	235	235	5.22e-150	416	1070
844	AT1G09960.1	AL1G20590.t1	0.0123837	0.144873	0.0854801	NG	96.9	496	512	14	2	2	505	98.6	1	511	511	100	100	1	511	511	0	978	2527
845	AT1G09970.2	AL1G20612.t1	0.0185626	0.182295	0.101827	NG	96.9	948	978	29	1	1	961	98.3	1	978	978	100	100	1	977	977	0	1059	2738
846	AT1G09980.1	AL2G17870.t1	0.0967036	0.615385	0.157143	NG	81.2	653	804	141	4	10	722	89.8	1	803	803	100	100	1	795	795	0	1311	3392
847	AT1G10010.2	AL1G20710.t1	0.0196132	0.112985	0.173591	NG	96.2	459	477	18	0	0	469	98.3	1	477	477	100	100	1	477	477	0	902	2331
848	AT1G10020.1	AL1G20720.t1	0.00579803	0.143677	0.0403547	NG	95.5	441	462	21	0	0	441	95.5	1	462	462	100	100	1	462	462	0	867	2241
849	AT1G10030.1	AL1G20730.t1	0.0101626	0.0948422	0.107153	NG	99.2	126	127	1	0	0	127	100	1	127	130	97.7	97.7	1	127	130	2.47e-91	259	663
850	AT1G10040.1	AL1G20740.t1	0.0340941	0.131852	0.258579	NG	88.5	368	416	45	1	3	380	91.3	1	413	413	100	100	1	416	416	1.96e-268	731	1887
851	AT1G10050.3	AL1G20750.t1	0.0317936	0.113664	0.279715	NG	93.3	1023	1097	73	1	1	1057	96.4	1	1096	1096	100	100	1	1097	1097	0	2073	5372
852	AT1G10060.2	AL1G20760.t1	0.0210321	0.131896	0.159459	NG	95.1	366	385	18	1	1	377	97.9	1	385	385	100	100	1	384	384	1.07e-266	724	1869
853	AT1G10070.1	AL1G20774.t1	0.0166277	0.0724769	0.229421	NG	96.4	375	389	14	0	0	382	98.2	1	389	389	100	100	1	389	389	8.9e-275	745	1923
854	AT1G10090.1	AL2G17680.t2	0.140342	0.545389	0.257324	NG	76.5	585	765	178	2	2	671	87.7	1	763	763	100	100	1	765	765	0	1185	3065
855	AT1G10095.1	AL1G20790.t1	0.0528421	0.144406	0.365926	NG	88	374	425	47	1	4	395	92.9	1	421	421	100	100	1	425	425	4.74e-278	756	1952
856	AT1G10110.1	AL1G20650.t2	0.0700084	0.117574	0.595442	NG	84.8	346	408	50	5	12	361	88.5	1	400	400	100	100	1	404	404	8.1e-257	701	1808
857	AT1G10120.1	AL1G20810.t1	0.0130345	0.092738	0.140552	NG	96.7	355	367	10	2	2	360	98.1	1	367	367	100	100	1	365	365	4.4e-252	686	1769
858	AT1G10130.1	AL1G20820.t1	0.00355041	0.071615	0.0495764	NG	98.6	985	999	8	1	6	988	98.9	1	999	999	100	100	1	993	993	0	1901	4925
859	AT1G10140.1	AL1G20830.t1	0.0335929	0.124709	0.269371	NG	92	150	163	13	0	0	156	95.7	1	163	168	97	97	1	163	167	1.2e-91	263	673
860	AT1G10150.1	AL1G20840.t1	0.0259196	0.112163	0.23109	NG	92.8	388	418	23	2	7	401	95.9	1	415	415	100	100	1	414	414	3.27e-267	728	1879
861	AT1G10155.1	AL1G20850.t1	0.0235686	0.0783283	0.300895	NG	94.6	176	186	9	1	1	181	97.3	1	185	185	100	100	1	186	186	1.08e-130	363	933
862	AT1G10170.1	AL1G49270.t1	0.14225	0.814479	0.174652	NG	70.1	844	1204	250	20	110	936	77.7	1	1189	1189	100	100	1	1109	1109	0	1542	3993
863	AT1G10180.1	AL1G20870.t1	0.00988752	0.129525	0.076337	NG	88.8	743	837	27	1	67	750	89.6	1	770	770	100	100	1	837	837	0	1375	3559
864	AT1G10190.1	AL7G40770.t1	0.107405	0.253169	0.424244	NG	79.4	316	398	79	1	3	357	89.7	3	397	397	99.5	99.5	7	404	404	9.46e-246	672	1735
865	AT1G10200.1	AL1G20900.t1	0.0022522	0.120962	0.0186191	NG	99.5	190	191	1	0	0	190	99.5	1	191	191	100	100	1	191	191	1e-149	412	1059
866	AT1G10210.1	AL1G20910.t1	0.00814589	0.209693	0.0388467	NG	98.1	364	371	7	0	0	368	99.2	1	371	371	100	100	1	371	371	3.35e-254	691	1784
867	AT1G10220.1	AL1G20920.t1	0.167678	0.272154	0.616115	NG	89	146	164	18	0	0	154	93.9	1	164	208	78.8	78.8	1	164	275	1.64e-86	256	654
868	AT1G10225.1	AL1G20930.t1	0.199392	0.29512	0.675631	NG	71.1	69	97	28	0	0	80	82.5	13	109	109	89	89	97	193	193	7.44e-45	143	361
869	AT1G10230.1	AL1G20940.t1	0.0455727	0.191054	0.238534	NG	82.5	127	154	26	1	1	134	87	4	157	159	96.9	96.9	27	179	181	3.21e-83	242	618
870	AT1G10240.1	AL1G20950.t1	0.00508795	0.119321	0.0426409	NG	98.8	673	681	8	0	0	677	99.4	1	681	681	100	100	1	681	681	0	1363	3527
871	AT1G10270.1	AL1G21000.t1	0.0135929	0.0644655	0.210855	NG	93.7	856	914	58	0	0	863	94.4	1	914	914	100	100	1	914	914	0	976	2523
872	AT1G10280.1	AL1G21010.t1	0.00314218	0.0480613	0.0653785	NG	99.3	410	413	3	0	0	413	100	1	413	413	100	100	1	413	413	2.45e-305	852	2201
873	AT1G10290.1	AL2G17450.t1	0.0424708	0.603352	0.0703913	NG	91.5	844	922	70	3	8	889	96.4	1	915	915	100	100	1	921	921	0	1531	3964
874	AT1G10300.1	AL1G14420.t1	0.120266	0.640651	0.187725	NG	75.7	511	675	145	4	19	567	84	30	688	688	95.8	95.8	1	672	672	0	933	2412
875	AT1G10310.1	AL1G21040.t1	0.00738531	0.0751871	0.0982258	NG	98.4	239	243	4	0	0	242	99.6	1	243	243	100	100	1	243	243	4.56e-165	455	1171
876	AT1G10320.1	AL1G21050.t1	0.0441464	0.150877	0.292599	NG	88.4	562	636	60	3	14	578	90.9	54	681	758	82.8	82.8	54	683	773	0	1031	2665
877	AT1G10330.1	AL1G21070.t1	0.0429281	0.135603	0.316571	NG	90.8	425	468	43	0	0	442	94.4	1	468	468	100	100	1	468	468	2.87e-305	844	2180
878	AT1G10340.1	AL1G21080.t1	0.0288683	0.130163	0.221786	NG	86.7	502	579	32	3	45	512	88.4	1	579	579	100	100	1	534	534	5.17e-305	838	2165
879	AT1G10350.1	AL1G21090.t1	0.0063651	0.164363	0.0387259	NG	95.7	335	350	8	1	7	337	96.3	1	350	350	100	100	1	343	343	7.71e-234	638	1645
880	AT1G10360.1	AL1G21100.t1	0.0230287	0.211597	0.108833	NG	95.2	217	228	11	0	0	225	98.7	1	228	228	100	100	1	228	228	3.96e-163	449	1155
881	AT1G10370.1	AL1G21110.t1	0.0133894	0.104686	0.127901	NG	96.9	221	228	7	0	0	224	98.2	1	228	228	100	100	1	228	228	6.84e-164	451	1160
882	AT1G10380.1	AL1G21120.t1	0.0309416	0.203133	0.152322	NG	98.5	269	273	4	0	0	270	98.9	21	293	306	89.2	89.2	21	293	302	1.46e-212	580	1496
883	AT1G10385.1	AL1G21140.t1	0.0081702	0.158448	0.051564	NG	98.3	742	755	13	0	0	749	99.2	1	755	755	100	100	1	755	755	0	1384	3583
884	AT1G10390.1	AL1G21160.t2	0.00735681	0.0397428	0.185111	NG	95.2	994	1044	48	1	2	1001	95.9	1	1042	1042	100	100	1	1044	1044	0	1313	3398
885	AT1G10400.1	AL1G21170.t1	0.0271328	0.106318	0.255204	NG	93.8	439	468	29	0	0	454	97	1	468	468	100	100	1	468	468	0	874	2257
886	AT1G10410.1	AL1G21180.t1	0.0170041	0.136654	0.124432	NG	96.5	354	367	13	0	0	364	99.2	120	486	486	75.5	75.5	1	367	367	8.35e-263	718	1853
887	AT1G10417.4	AL1G21190.t1	0.0418515	0.118506	0.353158	NG	77.6	343	442	57	2	42	359	81.2	1	442	442	100	100	1	400	400	3.95e-216	599	1545
888	AT1G10430.1	AL1G21210.t1	0.00141225	0.0967884	0.0145911	NG	99.7	306	307	1	0	0	307	100	1	307	307	100	100	1	307	307	5.45e-239	647	1670
889	AT1G10450.1	AL2G16860.t1	0.216167	0.642065	0.336674	NG	61.1	722	1182	388	19	72	868	73.4	1	1121	1123	99.8	99.8	1	1171	1172	0	1266	3277
890	AT1G10455.1	AL1G21240.t1	0.122854	0.23783	0.516561	NG	79.9	107	134	26	1	1	119	88.8	1	133	153	86.9	86.9	1	134	147	2.75e-75	221	562
891	AT1G10460.1	AL1G21250.t1	0.0424996	0.157174	0.270397	NG	92.6	189	204	15	0	0	197	96.6	13	216	218	93.6	93.6	1	204	206	6.66e-136	379	973
892	AT1G10470.1	AL1G21260.t1	0.0210637	0.143068	0.147229	NG	92.8	245	264	10	3	9	251	95.1	1	260	260	100	100	1	259	259	3.04e-153	427	1097
893	AT1G10480.1	AL1G21280.t1	0.0320767	0.208574	0.153791	NG	92.7	191	206	15	0	0	202	98.1	7	212	212	97.2	97.2	1	206	206	4.12e-133	372	954
894	AT1G10490.1	AL1G21290.t1	0.0110608	0.103149	0.107232	NG	97.6	1005	1030	24	1	1	1016	98.6	1	1029	1029	100	100	1	1030	1030	0	1941	5029
895	AT1G10500.1	AL1G21300.t1	0.019895	0.182666	0.108915	NG	94	172	183	8	2	3	175	95.6	1	181	181	100	100	1	182	182	1.71e-116	327	839
896	AT1G10510.1	AL1G21310.t1	0.0087221	0.115081	0.0757911	NG	98.2	595	606	11	0	0	600	99	1	606	606	100	100	1	606	606	4.09e-150	446	1146
897	AT1G10520.1	AL1G21320.t1	0.0279179	0.0897793	0.310962	NG	93.9	417	444	27	0	0	431	97.1	87	530	530	83.8	83.8	1	444	444	5e-305	832	2150
898	AT1G10522.1	AL1G21330.t1	0.0259672	0.215223	0.120653	NG	90.8	167	184	12	1	5	171	92.9	2	180	180	99.4	99.4	4	187	187	3.38e-117	329	844
899	AT1G10530.1	AL1G21340.t1	0.039151	0.176068	0.222362	NG	92.2	154	167	13	0	0	158	94.6	1	167	167	100	100	1	167	167	3.95e-99	282	722
900	AT1G10540.1	AL1G21350.t1	0.0295703	0.131924	0.224147	NG	93.9	507	540	33	0	0	520	96.3	1	540	540	100	100	1	540	540	0	1008	2605
901	AT1G10550.1	AL1G21360.t1	0.0140376	0.123392	0.113764	NG	97.1	302	311	9	0	0	305	98.1	1	311	311	100	100	9	319	319	5.75e-229	623	1606
902	AT1G10560.1	AL1G21380.t1	0.0423054	0.161617	0.261763	NG	91	635	698	63	0	0	658	94.3	1	698	698	100	100	1	698	698	0	1232	3188
903	AT1G10570.1	AL1G21390.t1	0.039786	0.123797	0.321382	NG	91.2	520	570	48	2	2	537	94.2	1	569	572	99.5	99.5	1	569	572	0	1034	2673
904	AT1G10580.1	AL1G21402.t1	0.0164395	0.128916	0.12752	NG	94.1	540	574	33	1	1	554	96.5	1	574	574	100	100	1	573	573	0	1097	2838
905	AT1G10585.1	AL1G21404.t1	0.0220849	0.0879852	0.251007	NG	90.4	169	187	9	1	9	174	93	1	178	182	97.8	97.8	1	187	188	1.66e-111	315	807
906	AT1G10586.1	AL1G21410.t1	0.0381249	0.108816	0.350363	NG	92	161	175	14	0	0	165	94.3	1	175	175	100	100	1	175	175	4.05e-105	298	763
907	AT1G10588.1	AL1G21430.t1	0.0339939	0.0523051	0.649917	NG	92.3	84	91	7	0	0	89	97.8	1	91	91	100	100	1	91	91	1.52e-60	179	453
908	AT1G10588.2	AL5G18160.t2	0.0494779	0.111006	0.445723	NG	91.1	82	90	8	0	0	86	95.6	1	90	90	100	100	1	90	90	2.76e-58	173	438
909	AT1G10590.1	AL1G21440.t1	0.0254667	0.17218	0.147908	NG	93.6	132	141	8	1	1	138	97.9	1	140	140	100	100	1	141	141	5.38e-91	259	663
910	AT1G10600.1	AL1G21450.t1	0.00785263	0.0949701	0.0826853	NG	98.2	220	224	4	0	0	221	98.7	1	224	224	100	100	1	224	224	5.87e-163	448	1153
911	AT1G10610.1	AL1G21460.t1	0.0366689	0.118369	0.309785	NG	91.2	403	442	37	2	2	421	95.2	1	442	442	100	100	1	440	440	6.2e-290	788	2034
912	AT1G10620.1	AL1G21470.t1	0.021679	0.0990478	0.218874	NG	90.4	653	722	64	2	5	661	91.6	1	719	719	100	100	1	720	720	0	975	2520
913	AT1G10630.1	AL1G21480.t1	0.00237896	0.164317	0.0144779	NG	99.5	181	182	1	0	0	182	100	1	182	182	100	100	1	182	182	1.67e-130	363	931
914	AT1G10640.1	AL1G21490.t1	0.0221226	0.124488	0.177709	NG	94.8	508	536	25	1	3	520	97	1	533	533	100	100	1	536	536	0	993	2567
915	AT1G10650.1	AL1G21500.t1	0.0223417	0.13818	0.161685	NG	90.3	307	340	29	2	4	311	91.5	1	340	340	100	100	1	336	336	2.34e-210	578	1489
916	AT1G10657.2	AL1G21510.t1	0.0171048	0.167912	0.101867	NG	97.1	99	102	3	0	0	100	98	1	102	102	100	100	1	102	102	6.28e-74	213	543
917	AT1G10660.1	AL1G21520.t1	0.0235428	0.126398	0.186259	NG	94.4	303	321	17	1	1	313	97.5	1	321	321	100	100	1	320	320	2.99e-227	619	1596
918	AT1G10670.1	AL1G21530.t1	0.0072138	0.125617	0.0574268	NG	98.3	417	424	7	0	0	422	99.5	1	424	424	100	100	1	424	424	1.16e-305	828	2140
919	AT1G10690.1	AL1G21560.t1	0.0331351	0.175231	0.189095	NG	92.8	103	111	8	0	0	105	94.6	1	111	111	100	100	1	111	111	2.87e-72	210	534
920	AT1G10700.1	AL1G21570.t1	0.012907	0.113112	0.114108	NG	97.3	401	412	11	0	0	406	98.5	1	412	412	100	100	1	412	412	3.59e-288	781	2016
921	AT1G10710.1	AL1G21590.t1	0.0694359	0.0922913	0.752356	NG	84.9	298	351	50	2	3	322	91.7	1	350	350	100	100	1	349	349	1.96e-210	579	1492
922	AT1G10717.1	AL1G21602.t1	0.144158	0.121466	1.18682	NG	81.6	71	87	15	1	1	77	88.5	1	87	91	95.6	95.6	1	86	90	1.74e-50	153	387
923	AT1G10720.1	AL1G21604.t1	0.0372609	0.126982	0.293434	NG	88.9	391	440	18	5	31	397	90.2	1	430	430	100	100	1	419	419	7.09e-237	652	1682
924	AT1G10740.1	AL1G21660.t1	0.0137822	0.0993662	0.138701	NG	96	458	477	13	3	6	467	97.9	1	474	474	100	100	1	474	474	0	935	2416
925	AT1G10750.1	AL1G21680.t1	0.00417538	0.129056	0.0323532	NG	99	410	414	4	0	0	412	99.5	55	468	468	88.5	88.5	1	414	414	9.91e-305	855	2210
926	AT1G10760.1	AL1G21690.t1	0.0134901	0.0860517	0.156768	NG	96.9	1356	1400	41	1	3	1379	98.5	1	1400	1400	100	100	1	1397	1397	0	2651	6871
927	AT1G10770.1	AL1G21700.t1	0.0201166	0.137775	0.146011	NG	95.8	161	168	7	0	0	165	98.2	1	168	168	100	100	1	168	168	1.51e-108	306	784
928	AT1G10780.1	AL1G21710.t1	0.0357677	0.132171	0.270617	NG	92.4	387	419	32	0	0	403	96.2	1	419	419	100	100	1	419	419	6.9e-285	773	1996
929	AT1G10790.1	AL1G21720.t1	0.0691835	0.10799	0.640649	NG	87.3	288	330	42	0	0	302	91.5	1	330	337	97.9	97.9	1	330	331	1.53e-197	545	1404
930	AT1G10800.1	AL1G21730.t1	0.032045	0.247405	0.129525	NG	95.7	111	116	5	0	0	112	96.6	1	116	119	97.5	97.5	1	116	124	2.04e-70	206	524
931	AT1G10810.1	AL1G21740.t1	0.0233962	0.139381	0.167858	NG	88.7	306	345	17	1	22	316	91.6	1	345	345	100	100	1	323	323	1.09e-220	603	1556
932	AT1G10830.1	AL1G21760.t1	0.0109299	0.0993938	0.109966	NG	97.3	358	368	9	1	1	364	98.9	1	368	368	100	100	1	367	367	2.05e-260	707	1824
933	AT1G10840.1	AL1G21780.t1	0.00382482	0.104942	0.0364468	NG	99.1	335	338	3	0	0	338	100	1	338	338	100	100	1	338	338	2.42e-244	664	1712
934	AT1G10850.1	AL1G21790.t1	0.0162461	0.167359	0.0970731	NG	95.2	633	665	27	2	5	645	97	1	664	664	100	100	1	661	661	0	1110	2872
935	AT1G10865.1	AL1G21800.t1	0.0183484	0.218453	0.0839924	NG	95.8	69	72	3	0	0	70	97.2	1	72	72	100	100	1	72	72	1.28e-48	147	371
936	AT1G10870.2	AL2G15660.t1	0.108506	0.682747	0.158925	NG	79.7	623	782	148	5	11	681	87.1	1	779	781	99.7	99.7	1	774	776	0	1196	3094
937	AT1G10880.1	AL1G21840.t1	0.0486302	0.202415	0.24025	NG	94.6	335	354	13	2	6	342	96.6	1	354	387	91.5	91.5	1	348	528	1.79e-245	676	1745
938	AT1G10890.2	AL1G21850.t1	0.020843	0.159503	0.130675	NG	81.4	197	242	45	0	0	202	83.5	1	242	242	100	100	1	242	242	2.09e-36	128	322
939	AT1G10900.1	AL1G21880.t1	0.0103282	0.128747	0.0802209	NG	95.7	739	772	16	1	17	749	97	1	755	755	100	100	1	772	772	0	1109	2869
940	AT1G10910.1	AL1G21890.t1	0.0181375	0.0983984	0.184327	NG	96.1	518	539	21	0	0	523	97	124	662	665	81.1	81.1	1	539	542	4.67e-230	649	1675
941	AT1G10930.1	AL1G21910.t1	0.0191802	0.101571	0.188834	NG	95	1130	1190	53	3	7	1151	96.7	7	1189	1189	99.5	99.5	1	1190	1190	0	2215	5740
942	AT1G10940.1	AL1G21920.t1	0.00475565	0.128695	0.0369528	NG	97	354	365	10	1	1	355	97.3	1	364	364	100	100	1	365	365	1.49e-240	656	1693
943	AT1G10950.1	AL1G21930.t1	0.00369523	0.0967646	0.0381878	NG	99	584	590	5	1	1	589	99.8	1	590	590	100	100	1	589	589	0	1160	3000
944	AT1G10960.1	AL1G21940.t1	0.0180003	0.133015	0.135326	NG	96	143	149	6	0	0	148	99.3	1	149	149	100	100	1	149	149	2.83e-97	276	706
945	AT1G10970.1	AL1G21950.t1	0.0208606	0.184296	0.113191	NG	94.5	361	382	14	2	7	368	96.3	1	375	375	100	100	35	416	416	8.94e-232	637	1642
946	AT1G11020.1	AL1G22000.t1	0.00405871	0.153717	0.0264038	NG	97.2	317	326	3	3	6	319	97.9	1	322	322	100	100	1	324	324	4.79e-232	631	1628
947	AT1G11040.1	AL1G22020.t1	0.015083	0.211355	0.0713632	NG	96.6	424	439	15	0	0	431	98.2	1	439	439	100	100	1	439	439	7.86e-292	792	2046
948	AT1G11050.1	AL1G22030.t1	0.0165993	0.158858	0.104491	NG	96.2	605	629	21	1	3	613	97.5	1	626	626	100	100	1	629	629	0	1210	3131
949	AT1G11060.1	AL2G15410.t1	0.169662	0.730335	0.232307	NG	66.4	582	877	258	13	37	664	75.7	58	931	931	93.9	93.9	1	843	843	0	1008	2605
950	AT1G11070.4	AL1G22050.t1	0.0419649	0.150339	0.279135	NG	84.5	677	801	68	4	56	699	87.3	1	747	747	100	100	1	799	799	0	1073	2774
951	AT1G11080.1	AL1G22060.t1	0.0148928	0.116981	0.12731	NG	96.8	477	493	16	0	0	483	98	1	493	493	100	100	1	493	493	0	997	2578
952	AT1G11090.1	AL1G22070.t1	0.0120878	0.104423	0.115757	NG	96.9	313	323	9	1	1	319	98.8	1	322	325	99.1	99.1	1	323	324	1.19e-235	640	1652
953	AT1G11100.4	AL2G15230.t1	0.221572	0.5983	0.370336	NG	58.7	791	1347	436	23	120	924	68.6	1	1270	1271	99.9	99.9	1	1304	1307	0	1352	3500
954	AT1G11110.1	AL1G22090.t1	0.0847095	0.130685	0.648196	NG	83.6	230	275	45	0	0	244	88.7	5	279	279	98.6	98.6	14	288	288	3.01e-151	424	1089
955	AT1G11112.1	AL1G22100.t1	0.0270213	0.0932721	0.289704	NG	92.5	74	80	5	1	1	78	97.5	1	79	79	100	100	1	80	80	1.52e-48	147	372
956	AT1G11120.2	AL1G22110.t1	0.0137824	0.194239	0.0709557	NG	93.8	152	162	10	0	0	154	95.1	1	162	162	100	100	1	162	162	6.4e-98	279	713
957	AT1G11125.1	AL1G22120.t1	0.0516968	0.139629	0.370243	NG	90.2	240	266	26	0	0	248	93.2	1	266	266	100	100	1	266	266	1.6e-128	365	936
958	AT1G11130.1	AL1G22130.t1	0.00902705	0.101259	0.0891485	NG	95.2	658	691	32	1	1	666	96.4	79	769	769	89.9	89.9	1	690	690	0	1089	2816
959	AT1G11160.3	AL1G22180.t1	0.0336577	0.111125	0.302882	NG	87.6	853	974	114	3	7	870	89.3	11	978	978	99	99	2	974	974	0	1111	2873
960	AT1G11170.1	AL1G22190.t1	0.0253053	0.105183	0.240585	NG	93.3	405	434	28	1	1	415	95.6	1	434	439	98.9	98.9	1	433	437	4.03e-289	785	2028
961	AT1G11180.1	AL1G22200.t1	0.0168907	0.16245	0.103975	NG	95.2	278	292	11	1	3	281	96.2	1	292	292	100	100	1	289	289	9.4e-184	506	1304
962	AT1G11190.1	AL1G22220.t1	0.00561554	0.113104	0.0496491	NG	98.7	302	306	4	0	0	304	99.3	1	306	306	100	100	1	306	306	1.05e-231	629	1622
963	AT1G11200.1	AL1G22230.t1	0.0175768	0.233668	0.0752214	NG	96.6	286	296	10	0	0	289	97.6	1	296	296	100	100	1	296	296	1.69e-207	567	1461
964	AT1G11210.1	AL1G22240.t1	0.0369686	0.172773	0.213973	NG	88.7	276	311	33	2	2	287	92.3	1	309	309	100	100	1	311	311	2.61e-186	514	1325
965	AT1G11220.1	AL1G22250.t1	0.0659875	0.196688	0.335493	NG	84.8	267	315	42	3	6	288	91.4	1	310	311	99.7	99.7	1	314	318	4.51e-180	499	1285
966	AT1G11240.1	AL1G22260.t1	0.0328839	0.130292	0.252387	NG	89.6	180	201	21	0	0	185	92	1	201	201	100	100	1	201	201	1.27e-93	271	693
967	AT1G11250.1	AL1G22270.t1	0.00428477	0.175372	0.0244324	NG	99	295	298	3	0	0	295	99	1	298	299	99.7	99.7	1	298	300	1.31e-199	547	1410
968	AT1G11260.1	AL1G22290.t1	0.00253326	0.14478	0.0174973	NG	99.4	520	523	3	0	0	521	99.6	1	523	523	100	100	1	523	523	0	1033	2672
969	AT1G11270.1	AL1G22350.t1	0.0739509	0.122573	0.603323	NG	78.8	249	316	45	3	22	265	83.9	1	311	313	99.4	99.4	1	299	310	8.56e-179	496	1276
970	AT1G11280.1	AL2G14740.t1	0.232542	0.783225	0.296904	NG	62.8	520	828	294	7	14	630	76.1	2	824	831	99	99	39	857	1091	0	1039	2686
971	AT1G11290.1	AL1G22370.t1	0.0275799	0.161533	0.170739	NG	94.4	765	810	45	0	0	789	97.4	1	810	810	100	100	1	810	810	0	1536	3977
972	AT1G11310.1	AL1G22390.t1	0.0214968	0.0807828	0.266106	NG	92.4	532	576	40	2	4	542	94.1	1	574	574	100	100	1	574	574	0	1022	2642
973	AT1G11320.1	AL1G22400.t1	0.0363319	0.127975	0.283898	NG	92	391	425	32	1	2	405	95.3	1	425	425	100	100	1	423	423	3.12e-279	759	1960
974	AT1G11330.1	AL1G22410.t2	0.0145071	0.126938	0.114285	NG	95.9	811	846	28	3	7	827	97.8	1	841	841	100	100	1	844	844	0	1572	4071
975	AT1G11360.1	AL1G22450.t1	0.0161785	0.17078	0.0947331	NG	96.7	234	242	8	0	0	239	98.8	1	242	243	99.6	99.6	1	242	248	5.95e-169	465	1197
976	AT1G11380.1	AL1G22470.t1	0.0172554	0.186319	0.0926122	NG	93.4	239	256	16	1	1	242	94.5	1	255	255	100	100	1	256	256	4.39e-176	484	1246
977	AT1G11390.1	AL1G22480.t1	0.0158605	0.125083	0.1268	NG	96.5	603	625	22	0	0	616	98.6	1	625	625	100	100	1	625	625	0	1214	3141
978	AT1G11400.1	AL1G22490.t1	0.0349157	0.129431	0.269764	NG	92.1	186	202	16	0	0	194	96	4	205	205	98.5	98.5	6	207	207	4.58e-117	331	848
979	AT1G11410.1	AL1G22500.t1	0.0242303	0.153481	0.157871	NG	93.4	790	846	53	1	3	807	95.4	1	846	846	100	100	1	843	843	0	1608	4164
980	AT1G11420.1	AL1G22510.t2	0.12725	0.241665	0.526554	NG	71.6	446	623	147	9	30	495	79.5	1	605	605	100	100	1	611	611	2.3e-283	785	2027
981	AT1G11430.1	AL1G22520.t1	0.017107	0.193897	0.0882273	NG	96.1	224	233	9	0	0	230	98.7	1	233	233	100	100	1	233	233	1.37e-161	446	1146
982	AT1G11440.1	AL1G22530.t1	0.0351777	0.126024	0.279135	NG	88.8	324	365	33	3	8	335	91.8	1	364	364	100	100	1	358	358	1.24e-177	497	1279
983	AT1G11450.3	AL1G22540.t1	0.0318603	0.108004	0.29499	NG	93.5	314	336	22	0	0	323	96.1	1	336	353	95.2	95.2	1	336	337	2.82e-217	596	1536
984	AT1G11470.1	AL1G22570.t1	0.263989	0.400582	0.659013	NG	49.1	82	167	53	2	32	101	60.5	16	150	151	89.4	89.4	10	176	180	1.67e-42	139	349
985	AT1G11475.1	AL1G22580.t1	NA	0.0908793	0	NG	100	72	72	0	0	0	72	100	1	72	72	100	100	1	72	72	9.34e-51	152	385
986	AT1G11480.1	AL1G22590.t1	0.0518474	0.0932571	0.555962	NG	88.8	516	581	61	2	4	539	92.8	1	579	579	100	100	1	579	579	0	989	2556
987	AT1G11490.1	AL1G22600.t1	0.0481358	0.211584	0.227502	NG	89.6	328	366	35	2	3	340	92.9	1	366	366	100	100	1	363	363	4.78e-237	647	1670
988	AT1G11500.1	AL1G22610.t1	0.0341418	0.0879541	0.388178	NG	92.4	171	185	14	0	0	175	94.6	1	185	185	100	100	1	185	185	7.8e-117	328	842
989	AT1G11510.1	AL3G53940.t1	0.200747	0.434552	0.461964	NG	60.5	201	332	99	7	32	226	68.1	43	353	353	88.1	88.1	42	362	362	1.36e-98	296	757
990	AT1G11530.1	AL1G22630.t1	0.0182213	0.160222	0.113725	NG	95.8	114	119	5	0	0	117	98.3	1	119	119	100	100	1	119	119	2.47e-79	228	582
991	AT1G11545.1	AL1G22650.t1	0.0097431	0.195368	0.0498705	NG	97.4	299	307	7	1	1	304	99	1	306	306	100	100	1	307	307	3.53e-237	643	1658
992	AT1G11560.1	AL1G22670.t1	0.0508498	0.199849	0.254441	NG	90.1	308	342	34	0	0	324	94.7	1	342	344	99.4	99.4	1	342	344	3.63e-217	595	1535
993	AT1G11572.1	AL1G22680.t1	0.0401274	0.1606	0.249859	NG	92.2	83	90	7	0	0	87	96.7	1	90	90	100	100	1	90	90	1.54e-55	166	420
994	AT1G11580.1	AL1G22690.t1	0.0165614	0.197455	0.0838745	NG	96.1	536	558	21	1	1	547	98	1	558	558	100	100	1	557	557	0	1055	2727
995	AT1G11600.1	AL1G22730.t1	0.0111762	0.178901	0.0624713	NG	97.5	498	511	13	0	0	505	98.8	1	511	511	100	100	1	511	511	0	1011	2615
996	AT1G11620.1	AL1G22750.t1	0.049825	0.112918	0.441248	NG	87	321	369	43	1	5	339	91.9	1	364	364	100	100	1	369	369	1.04e-241	659	1701
997	AT1G11630.1	AL1G22760.t1	0.0275151	0.156731	0.175556	NG	90	362	402	40	0	0	373	92.8	1	402	406	99	99	1	402	404	1.5e-193	541	1393
998	AT1G11650.2	AL1G22780.t1	0.0130221	0.150816	0.0863437	NG	94.3	363	385	19	2	3	364	94.5	25	406	406	94.1	94.1	25	409	409	2.69e-244	669	1727
999	AT1G11655.1	AL1G22790.t1	0.048808	0.141959	0.343819	NG	89.5	102	114	12	0	0	108	94.7	1	114	114	100	100	1	114	114	6.68e-68	199	506
1000	AT1G11660.1	AL1G22800.t1	0.0113636	0.115059	0.0987629	NG	97.4	744	764	20	0	0	759	99.3	1	764	764	100	100	1	764	764	0	1452	3759
1001	AT1G11670.1	AL1G22810.t1	0.00438736	0.127769	0.0343383	NG	99	499	504	5	0	0	502	99.6	1	504	504	100	100	1	504	504	0	951	2457
1002	AT1G11680.1	AL1G22820.t1	0.0116245	0.157967	0.0735883	NG	98	479	489	10	0	0	488	99.8	1	489	489	100	100	1	489	489	0	966	2498
1003	AT1G11690.1	AL1G22830.t1	0.0628214	0.162657	0.386219	NG	86.3	214	248	34	0	0	229	92.3	1	248	248	100	100	1	248	248	9.67e-142	397	1019
1004	AT1G11700.1	AL1G22840.t1	0.0176716	0.152489	0.115888	NG	97.5	197	202	5	0	0	199	98.5	1	202	202	100	100	1	202	202	8.63e-104	297	760
1005	AT1G11710.1	AL1G22850.t1	0.0396377	0.136082	0.291277	NG	74.8	492	658	166	0	0	499	75.8	1	658	658	100	100	1	658	658	1.67e-171	504	1298
1006	AT1G11720.2	AL1G22860.t1	0.0181017	0.105579	0.171453	NG	94	1036	1102	44	3	22	1054	95.6	1	1095	1095	100	100	1	1087	1087	0	2028	5255
1007	AT1G11730.1	AL1G22880.t1	0.0271113	0.147661	0.183605	NG	94.2	326	346	20	0	0	339	98	40	385	385	89.9	89.9	1	346	346	3.06e-243	663	1711
1008	AT1G11740.1	AL1G22910.t1	0.0375783	0.161671	0.232437	NG	88.7	574	647	49	4	24	593	91.7	1	644	645	99.8	99.8	1	626	629	0	1098	2840
1009	AT1G11750.1	AL1G22920.t1	0.00658892	0.122667	0.0537137	NG	98.5	268	272	4	0	0	269	98.9	1	272	272	100	100	1	272	272	1.27e-190	522	1345
1010	AT1G11755.1	AL1G22930.t1	0.0242497	0.151179	0.160404	NG	94.5	241	255	14	0	0	248	97.3	1	255	255	100	100	1	255	255	7.85e-172	473	1218
1011	AT1G11760.1	AL1G22940.t1	0.0194532	0.199107	0.0977023	NG	94.2	145	154	6	2	3	147	95.5	1	152	152	100	100	1	153	153	1.6e-91	262	669
1012	AT1G11765.1	AL1G22950.t1	0.0246204	0.165723	0.148563	NG	94.9	131	138	7	0	0	134	97.1	1	138	138	100	100	1	138	138	4.67e-102	287	735
1013	AT1G11780.1	AL1G22970.t1	0.0308001	0.145462	0.211739	NG	93.4	325	348	21	1	2	338	97.1	1	346	346	100	100	1	348	348	9.82e-244	663	1710
1014	AT1G11790.1	AL1G22980.t1	0.0112301	0.0954797	0.117618	NG	97.5	383	393	10	0	0	389	99	1	393	393	100	100	1	393	393	2.05e-282	764	1974
1015	AT1G11800.1	AL1G22990.t1	0.0284677	0.137453	0.207109	NG	94.2	407	432	24	1	1	416	96.3	11	442	442	97.7	97.7	1	431	431	1.96e-293	796	2056
1016	AT1G11810.1	AL3G25970.t1	0.171821	0.227507	0.755234	NG	65.3	264	404	105	11	35	297	73.5	1	376	378	99.5	99.5	1	397	399	1.23e-162	461	1186
1017	AT1G11820.2	AL1G23000.t1	0.00942863	0.189088	0.0498637	NG	98	501	511	10	0	0	505	98.8	1	511	512	99.8	99.8	1	511	517	0	992	2564
1018	AT1G11840.1	AL1G23010.t1	0.0123933	0.0742102	0.167002	NG	97.5	277	284	7	0	0	279	98.2	1	284	284	100	100	1	284	284	2.61e-205	560	1444
1019	AT1G11860.1	AL1G23030.t1	0.00535019	0.129377	0.0413536	NG	99	405	409	4	0	0	407	99.5	1	409	409	100	100	1	409	409	2.69e-302	816	2108
1020	AT1G11870.2	AL1G23040.t1	0.0203174	0.255757	0.0794404	NG	94.4	487	516	24	4	5	503	97.5	1	515	515	100	100	1	512	512	0	917	2369
1021	AT1G11880.1	AL1G23050.t2	0.0356976	0.206996	0.172455	NG	89.5	453	506	37	2	16	469	92.7	1	490	490	100	100	1	506	506	0	880	2273
1022	AT1G11890.1	AL1G23060.t1	0.00396066	0.124952	0.0316974	NG	99.1	217	219	2	0	0	218	99.5	1	219	219	100	100	1	219	219	6.11e-158	435	1119
1023	AT1G11900.1	AL1G23070.t1	0.037327	0.194363	0.192048	NG	80.3	278	346	68	0	0	288	83.2	23	368	368	94	94	1	346	346	7.51e-134	385	990
1024	AT1G11905.1	AL1G23080.t1	0.00789512	0.158841	0.0497044	NG	93.7	208	222	14	0	0	210	94.6	1	222	222	100	100	1	222	222	2.19e-132	371	952
1025	AT1G11910.1	AL1G23090.t1	0.0113186	0.139756	0.0809887	NG	97.4	494	507	13	0	0	499	98.4	1	507	507	100	100	1	507	507	0	992	2565
1026	AT1G11915.1	AL1G23110.t2	0.0124564	0.218309	0.0570588	NG	97.2	307	316	9	0	0	312	98.7	15	330	330	95.8	95.8	1	316	316	4.09e-240	652	1681
1027	AT1G11920.1	AL1G23120.t1	0.0178207	0.154324	0.115476	NG	96.1	370	385	14	1	1	376	97.7	1	385	385	100	100	1	384	384	1.75e-281	761	1966
1028	AT1G11925.1	AL1G23130.t1	0.0276174	0.123104	0.224343	NG	82.5	85	103	18	0	0	89	86.4	1	103	141	73	73	1	103	141	2.47e-48	152	383
1029	AT1G11930.2	AL1G23140.t1	0.0156119	0.124602	0.125295	NG	96.7	233	241	8	0	0	236	97.9	16	256	256	94.1	94.1	1	241	241	1.76e-165	457	1175
1030	AT1G11940.1	AL1G23160.t1	0.0153988	0.0907353	0.169711	NG	96.9	372	384	12	0	0	375	97.7	1	384	384	100	100	1	384	384	2.67e-278	753	1945
1031	AT1G11950.1	AL1G23170.t1	0.0396651	0.155144	0.255666	NG	87.8	789	899	87	2	23	815	90.7	1	876	876	100	100	1	899	899	0	1523	3944
1032	AT1G11960.1	AL1G23180.t1	0.0152841	0.152693	0.100097	NG	96.9	748	772	24	0	0	759	98.3	1	772	772	100	100	1	772	772	0	1458	3774
1033	AT1G12010.1	AL1G23220.t1	0.0187395	0.201717	0.0928997	NG	95.6	307	321	14	0	0	311	96.9	1	321	321	100	100	1	321	321	3.24e-229	624	1609
1034	AT1G12020.1	AL1G23260.t1	0.0396603	0.216411	0.183264	NG	81.5	185	227	40	1	2	195	85.9	1	227	227	100	100	1	225	225	2.33e-129	363	933
1035	AT1G12030.1	AL1G23270.t1	0.0277124	0.132284	0.209492	NG	93.6	277	296	18	1	1	286	96.6	1	296	296	100	100	1	295	295	1.95e-199	546	1408
1036	AT1G12040.1	AL1G23280.t1	0.0237071	0.177392	0.133642	NG	95	379	399	20	0	0	383	96	1	399	745	53.6	53.6	1	399	402	9.23e-161	470	1210
1037	AT1G12050.1	AL1G23300.t1	0.0093802	0.108288	0.0866226	NG	97.9	413	422	9	0	0	421	99.8	1	422	422	100	100	1	422	422	0	864	2232
1038	AT1G12060.1	AL1G23310.t1	0.0535425	0.160813	0.332948	NG	88	191	217	24	2	2	202	93.1	1	216	216	100	100	1	216	216	7.05e-126	354	908
1039	AT1G12064.1	AL1G23320.t1	0.0519646	0.323465	0.16065	NG	82.1	92	112	18	2	2	95	84.8	1	110	110	100	100	1	112	112	1.84e-59	177	450
1040	AT1G12070.1	AL1G23330.t1	0.0174357	0.153841	0.113336	NG	96	215	224	8	1	1	219	97.8	1	224	224	100	100	1	223	223	4.24e-149	413	1062
1041	AT1G12080.2	AL1G23350.t1	0.0354634	0.0996707	0.355806	NG	89.2	124	139	15	0	0	128	92.1	1	139	139	100	100	1	139	139	1.29e-37	124	312
1042	AT1G12090.1	AL1G23360.t1	0.0032602	0.160864	0.0202668	NG	98.5	134	136	2	0	0	136	100	3	138	138	98.6	98.6	6	141	141	1.21e-82	238	608
1043	AT1G12110.1	AL1G23380.t1	0.00754743	0.130098	0.0580135	NG	98.3	581	591	9	1	1	588	99.5	1	591	591	100	100	1	590	590	0	1153	2983
1044	AT1G12120.1	AL1G23390.t1	0.0472882	0.139866	0.338098	NG	87.9	435	495	49	1	11	450	90.9	1	484	484	100	100	1	495	495	9.78e-300	816	2109
1045	AT1G12130.1	AL1G23400.t1	0.0449058	0.214648	0.209206	NG	89.5	418	467	42	2	7	436	93.4	1	467	471	99.2	99.2	1	460	465	1.53e-305	832	2149
1046	AT1G12140.1	AL1G23410.t1	0.0182144	0.182405	0.0998567	NG	96.1	442	460	18	0	0	455	98.9	1	460	460	100	100	1	460	460	0	908	2347
1047	AT1G12150.1	AL1G23420.t1	0.0164926	0.158656	0.103952	NG	96	527	549	22	0	0	534	97.3	1	549	549	100	100	1	549	549	1.82e-269	745	1923
1048	AT1G12160.1	AL1G23430.t1	0.0296801	0.1454	0.204127	NG	93.6	439	469	30	0	0	454	96.8	1	469	469	100	100	1	469	469	0	915	2366
1049	AT1G12170.1	AL1G23440.t1	0.0973172	0.0982931	0.990072	NG	75.1	274	365	73	3	18	299	81.9	1	365	365	100	100	1	347	347	3.03e-199	551	1420
1050	AT1G12180.1	AL1G23450.t1	0.190269	0.159141	1.19559	NG	68.3	82	120	34	2	4	100	83.3	1	120	120	100	100	1	116	116	5.53e-53	162	409
1051	AT1G12190.1	AL1G23460.t1	0.0661991	0.164672	0.402006	NG	86.1	317	368	49	2	2	334	90.8	4	370	376	97.6	97.6	1	367	368	2.86e-235	644	1660
1052	AT1G12200.1	AL1G23470.t1	0.0169256	0.156014	0.108487	NG	96.6	450	466	16	0	0	461	98.9	1	466	466	100	100	1	466	466	0	929	2402
1053	AT1G12230.1	AL1G23510.t1	0.0122263	0.119434	0.102368	NG	95.6	388	406	18	0	0	394	97	1	406	406	100	100	1	406	406	2.68e-280	760	1963
1054	AT1G12240.1	AL1G23520.t1	0.0175963	0.174675	0.100738	NG	95.9	638	665	26	1	1	653	98.2	1	665	665	100	100	1	664	664	0	1312	3395
1055	AT1G12244.1	AL1G23530.t1	0.0245096	0.133361	0.183785	NG	94.1	225	239	13	1	1	229	95.8	18	255	255	93.3	93.3	1	239	239	4.42e-156	433	1113
1056	AT1G12250.1	AL1G23540.t1	0.0159591	0.173393	0.0920396	NG	96.4	271	281	10	0	0	274	97.5	1	281	281	100	100	1	281	281	2.66e-132	375	964
1057	AT1G12260.1	AL1G23550.t1	0.00533813	0.0910189	0.0586485	NG	98.7	391	396	5	0	0	392	99	1	396	396	100	100	1	396	396	1.59e-292	790	2041
1058	AT1G12260.2	AL1G23550.t2	0.00617072	0.100628	0.0613224	NG	98.5	338	343	5	0	0	339	98.8	1	343	343	100	100	1	343	343	7.63e-255	691	1782
1059	AT1G12270.1	AL1G23580.t1	0.0318323	0.149726	0.212604	NG	87.3	500	573	73	0	0	515	89.9	1	573	573	100	100	1	573	573	3.03e-305	840	2170
1060	AT1G12280.1	AL1G23590.t1	0.0435913	0.130081	0.335107	NG	84.7	758	895	101	2	36	793	88.6	1	895	895	100	100	1	859	859	0	1391	3601
1061	AT1G12310.1	AL1G23640.t1	NA	0.203427	0	NG	100	149	149	0	0	0	149	100	1	149	149	100	100	1	149	149	1.58e-103	292	747
1062	AT1G12320.1	AL1G23650.t1	0.0240277	0.127105	0.189038	NG	94.4	202	214	11	1	1	208	97.2	1	213	213	100	100	1	214	214	5.79e-142	394	1013
1063	AT1G12330.1	AL1G23660.t1	0.0068717	0.188196	0.0365135	NG	98.6	499	506	6	1	1	501	99	1	506	506	100	100	1	505	505	6.69e-305	851	2199
1064	AT1G12350.1	AL1G23670.t1	0.0199467	0.12506	0.159496	NG	94	299	318	19	0	0	303	95.3	1	318	318	100	100	1	318	318	3.76e-206	565	1457
1065	AT1G12360.1	AL6G47030.t1	0.194553	1.89654	0.102583	NG	69.6	468	672	190	5	14	560	83.3	1	667	667	100	100	1	663	663	0	908	2347
1066	AT1G12370.1	AL1G23690.t1	0.0226234	0.139619	0.162037	NG	93.8	466	497	25	1	6	476	95.8	1	491	491	100	100	1	497	497	0	963	2490
1067	AT1G12380.1	AL1G23710.t1	0.00773909	0.180463	0.0428847	NG	95.2	759	797	31	3	7	768	96.4	1	794	794	100	100	1	793	793	0	1452	3759
1068	AT1G12390.1	AL1G23720.t1	0.00945834	0.0803993	0.117642	NG	97.8	135	138	3	0	0	135	97.8	1	138	138	100	100	1	138	138	9.79e-95	269	687
1069	AT1G12400.1	AL1G23730.t1	0.00591184	0.153674	0.0384701	NG	98.6	71	72	1	0	0	72	100	1	72	72	100	100	1	72	72	1.82e-48	147	370
1070	AT1G12410.1	AL1G23740.t1	0.00545723	0.15774	0.0345964	NG	98.9	277	280	3	0	0	279	99.6	1	280	280	100	100	1	280	280	3.7e-203	555	1429
1071	AT1G12420.1	AL1G23750.t1	0.0128642	0.114746	0.11211	NG	96.8	428	442	13	1	1	431	97.5	1	442	442	100	100	1	441	441	1.85e-305	827	2136
1072	AT1G12430.2	AL1G23770.t1	0.0133157	0.174847	0.0761566	NG	85.2	789	926	58	4	79	797	86.1	1	921	921	100	100	1	852	852	0	1141	2952
1073	AT1G12440.1	AL1G23780.t1	0.0237255	0.20192	0.117499	NG	92.4	157	170	12	1	1	161	94.7	1	169	169	100	100	1	170	170	5.02e-110	310	794
1074	AT1G12450.1	AL1G23790.t1	0.0163212	0.165947	0.0983515	NG	96.4	291	302	10	1	1	296	98	1	302	304	99.3	99.3	1	301	302	3.12e-202	554	1428
1075	AT1G12460.1	AL1G23810.t1	0.0302055	0.175677	0.171938	NG	90.6	800	883	83	0	0	816	92.4	1	883	883	100	100	1	883	883	0	902	2330
1076	AT1G12470.1	AL1G23830.t1	0.0175668	0.121403	0.144698	NG	96.4	954	990	35	1	1	976	98.6	1	989	989	100	100	1	990	990	0	1886	4886
1077	AT1G12480.1	AL1G23840.t1	0.010279	0.114665	0.0896434	NG	96.6	536	555	16	2	3	541	97.5	3	557	557	99.6	99.6	26	577	577	0	1045	2701
1078	AT1G12500.1	AL1G23850.t1	0.00376421	0.16621	0.0226473	NG	98.3	356	362	3	1	3	357	98.6	1	362	362	100	100	1	359	359	4.47e-240	655	1689
1079	AT1G12520.1	AL1G23870.t1	0.0319838	0.168358	0.189975	NG	87.9	282	321	37	1	2	286	89.1	1	321	321	100	100	1	319	319	1.59e-192	531	1368
1080	AT1G12530.1	AL1G23880.t1	0.0555243	0.152274	0.364635	NG	80.8	156	193	26	1	11	165	85.5	2	194	194	99.5	99.5	1	182	182	1.17e-99	285	730
1081	AT1G12540.1	AL1G23890.t1	0.2119	0.431614	0.490948	NG	86.5	115	133	17	1	1	120	90.2	1	132	258	51.2	51.2	1	133	182	8.96e-73	220	560
1082	AT1G12550.1	AL1G23900.t1	0.0704135	0.206226	0.341439	NG	84.8	285	336	38	3	13	303	90.2	1	324	324	100	100	1	335	335	1.06e-197	545	1404
1083	AT1G12560.1	AL1G23910.t1	0.025169	0.160471	0.156844	NG	94.7	249	263	14	0	0	255	97	1	263	263	100	100	1	263	263	4.85e-195	533	1372
1084	AT1G12570.1	AL1G23920.t1	0.0171149	0.145113	0.117942	NG	96.7	522	540	18	0	0	532	98.5	34	573	573	94.2	94.2	1	540	540	0	1029	2660
1085	AT1G12580.1	AL1G23930.t1	0.0210299	0.156785	0.134132	NG	95.2	498	523	25	0	0	509	97.3	1	523	523	100	100	1	523	523	0	983	2541
1086	AT1G12600.1	AL1G23950.t1	0.0138025	0.145015	0.0951802	NG	95.1	333	350	17	0	0	337	96.3	1	350	350	100	100	1	350	350	2.68e-238	649	1675
1087	AT1G12610.1	AL1G23960.t1	0.028666	0.233541	0.122745	NG	92.9	195	210	15	0	0	200	95.2	1	210	210	100	100	1	210	210	7.58e-134	374	959
1088	AT1G12620.1	AL1G24080.t1	0.0970654	0.2958	0.328145	NG	85	119	140	21	0	0	127	90.7	1	140	622	22.5	22.5	1	140	622	6.44e-71	240	613
1089	AT1G12630.1	AL1G23980.t1	0.0515102	0.129985	0.396279	NG	77.2	149	193	44	0	0	156	80.8	1	193	193	100	100	1	193	193	1.04e-102	293	751
1090	AT1G12640.1	AL1G24100.t1	0.00803153	0.13025	0.0616625	NG	98.5	456	463	7	0	0	460	99.4	1	463	463	100	100	1	463	463	0	913	2359
1091	AT1G12650.1	AL1G24110.t1	0.0104092	0.109101	0.0954089	NG	96	239	249	8	1	2	243	97.6	1	249	249	100	100	1	247	247	1.16e-149	417	1071
1092	AT1G12660.1	AL1G24120.t1	0.0465438	0.113269	0.410914	NG	88	103	117	12	1	2	108	92.3	8	122	122	94.3	94.3	1	117	117	2.5e-68	201	510
1093	AT1G12663.1	AL1G24130.t1	0.0706555	0.14049	0.502923	NG	87.7	100	114	13	1	1	106	93	1	113	116	97.4	97.4	1	114	119	8.87e-70	204	519
1094	AT1G12665.1	AL1G24140.t1	0.155951	0.291927	0.534211	NG	87	47	54	7	0	0	52	96.3	1	54	90	60	60	1	54	90	1.27e-29	100	250
1095	AT1G12672.2	AL1G24160.t1	0.0418848	0.157035	0.266724	NG	75.2	97	129	7	3	25	100	77.5	1	105	105	100	100	1	128	128	6.56e-55	166	421
1096	AT1G12680.1	AL1G24170.t2	0.0122055	0.084939	0.143697	NG	91.4	458	501	13	1	30	464	92.6	1	471	471	100	100	1	501	501	0	875	2260
1097	AT1G12700.1	AL1G24190.t1	0.0420768	0.107332	0.392023	NG	79.9	127	159	21	1	11	138	86.8	1	159	603	26.4	26.4	1	148	592	1.37e-76	254	649
1098	AT1G12710.1	AL1G24310.t1	0.0195498	0.125296	0.156029	NG	95.5	279	292	13	0	0	282	96.6	1	292	292	100	100	1	292	292	5.33e-218	593	1529
1099	AT1G12730.1	AL1G24320.t1	0.0458955	0.166295	0.275988	NG	84.2	393	467	42	4	32	414	88.7	11	475	475	97.9	97.9	1	437	437	2.69e-278	759	1961
1100	AT1G12740.2	AL1G24330.t1	0.0118209	0.162761	0.0726275	NG	96.2	461	479	12	1	6	467	97.5	1	479	479	100	100	1	473	473	0	933	2411
1101	AT1G12750.1	AL1G24340.t1	0.0579538	0.153316	0.378003	NG	88.3	272	308	36	0	0	288	93.5	1	308	308	100	100	1	308	308	1.94e-203	558	1437
1102	AT1G12760.1	AL1G24350.t1	0.0141406	0.141478	0.0999487	NG	94.4	387	410	20	2	3	390	95.1	1	409	409	100	100	1	408	408	1.8e-231	637	1643
1103	AT1G12770.1	AL1G24360.t1	0.0112323	0.143857	0.0780797	NG	97.5	538	552	14	0	0	546	98.9	1	552	552	100	100	1	552	552	0	1019	2636
1104	AT1G12775.1	AL1G23630.t1	0.119155	0.292859	0.406869	NG	80.5	132	164	32	0	0	150	91.5	1	164	645	25.4	25.4	1	164	770	2.53e-80	270	689
1105	AT1G12780.1	AL1G24390.t1	0.0111411	0.0654955	0.170105	NG	97.4	343	352	9	0	0	346	98.3	1	352	352	100	100	1	352	352	5.01e-260	704	1818
1106	AT1G12790.1	AL1G24400.t1	0.0228415	0.112605	0.202846	NG	94.8	238	251	13	0	0	242	96.4	1	251	251	100	100	1	251	251	4.17e-165	456	1173
1107	AT1G12800.1	AL1G24430.t1	0.0354332	0.126647	0.279779	NG	90.7	702	774	61	4	11	720	93	1	768	768	100	100	1	769	769	0	1224	3167
1108	AT1G12805.1	AL1G24440.t1	0.0645985	0.144817	0.44607	NG	84.2	64	76	10	1	2	69	90.8	1	76	76	100	100	1	74	74	1.97e-40	127	318
1109	AT1G12810.1	AL1G24450.t1	0.0206644	0.142223	0.145296	NG	93.2	124	133	6	1	3	126	94.7	1	130	130	100	100	1	133	133	5.88e-30	104	260
1110	AT1G12820.1	AL1G24460.t1	0.0128503	0.184871	0.0695097	NG	97.4	563	578	15	0	0	569	98.4	1	578	578	100	100	1	578	578	0	1129	2920
1111	AT1G12830.1	AL1G24470.t1	0.042738	0.118723	0.35998	NG	85.9	189	220	23	4	8	198	90	1	214	214	100	100	1	218	218	8.53e-85	250	638
1112	AT1G12840.1	AL1G24480.t1	0.0127973	0.103719	0.123384	NG	96.6	366	379	10	1	3	372	98.2	1	376	376	100	100	1	379	379	3.97e-263	714	1844
1113	AT1G12845.1	AL1G24490.t1	0.0345579	0.0693965	0.497977	NG	94.1	111	118	7	0	0	115	97.5	1	118	120	98.3	98.3	1	118	123	5.47e-75	218	554
1114	AT1G12850.1	AL1G24500.t1	0.018844	0.176263	0.106909	NG	94.6	384	406	17	2	5	390	96.1	1	406	406	100	100	1	401	401	2.32e-266	725	1871
1115	AT1G12860.1	AL1G24510.t1	0.023145	0.203223	0.113889	NG	88.7	407	459	36	7	16	414	90.2	1	451	451	100	100	1	451	451	3.43e-269	736	1900
1116	AT1G12880.1	AL1G24520.t1	0.0344795	0.112323	0.306968	NG	92.2	188	204	16	0	0	196	96.1	1	204	204	100	100	1	204	204	1.05e-137	383	983
1117	AT1G12890.1	AL1G24530.t1	0.0523173	0.136195	0.384135	NG	85	192	226	26	4	8	201	88.9	1	220	220	100	100	1	224	224	5.1e-131	367	943
1118	AT1G12900.1	AL1G24540.t1	0.00332029	0.106747	0.0311044	NG	99.3	397	400	3	0	0	399	99.8	1	400	400	100	100	1	400	400	1.11e-285	773	1997
1119	AT1G12910.1	AL1G24550.t1	0.00124866	0.138983	0.00898425	NG	99.7	346	347	1	0	0	347	100	1	347	347	100	100	1	347	347	7.13e-262	709	1829
1120	AT1G12920.1	AL1G24560.t1	0.000990131	0.122783	0.00806406	NG	99.8	434	435	1	0	0	435	100	1	435	435	100	100	1	435	435	2.04e-305	857	2213
1121	AT1G12930.1	AL1G24570.t1	0.00922794	0.0938805	0.0982945	NG	97.5	983	1008	23	1	2	992	98.4	1	1006	1006	100	100	1	1008	1008	0	1894	4906
1122	AT1G12940.1	AL1G24580.t1	0.0291714	0.18262	0.159738	NG	94	474	504	28	2	2	493	97.8	1	503	503	100	100	1	503	503	0	940	2430
1123	AT1G12950.1	AL1G24590.t1	0.0226361	0.113652	0.19917	NG	95	497	523	25	1	1	509	97.3	1	523	523	100	100	1	522	522	0	954	2465
1124	AT1G12970.1	AL1G24620.t1	0.0287805	0.179029	0.160759	NG	94.2	438	465	26	1	1	447	96.1	1	465	465	100	100	1	464	464	1.64e-164	472	1214
1125	AT1G12980.1	AL1G24630.t1	0.0578422	0.223439	0.258873	NG	76.3	254	333	68	5	11	264	79.3	1	329	329	100	100	1	326	326	1.27e-153	433	1114
1126	AT1G12990.1	AL1G24640.t1	0.00622118	0.163884	0.037961	NG	98.6	342	347	5	0	0	346	99.7	47	393	393	88.3	88.3	1	347	347	1.22e-265	720	1859
1127	AT1G13000.1	AL1G24650.t1	0.0129736	0.133403	0.0972512	NG	97	390	402	12	0	0	395	98.3	1	402	402	100	100	1	402	402	1.89e-303	818	2114
1128	AT1G13020.1	AL1G24670.t1	0.0195356	0.144194	0.135481	NG	92.6	512	553	38	1	3	521	94.2	1	550	550	100	100	1	553	553	6.2e-305	845	2183
1129	AT1G13030.1	AL1G24680.t1	0.0484233	0.116488	0.415695	NG	85.3	522	612	81	3	9	539	88.1	1	609	609	100	100	1	606	606	5.52e-303	835	2156
1130	AT1G13040.1	AL1G24690.t1	0.0183515	0.139654	0.131406	NG	98.8	252	255	3	0	0	253	99.2	1	255	518	49.2	49.2	1	255	518	5.66e-38	145	367
1131	AT1G13050.1	AL1G24700.t1	0.0224108	0.114323	0.196031	NG	95.3	303	318	15	0	0	309	97.2	1	318	318	100	100	1	318	318	1.71e-202	556	1433
1132	AT1G13060.1	AL1G24710.t1	0.00320245	0.121493	0.0263592	NG	99.3	273	275	2	0	0	274	99.6	1	275	275	100	100	1	275	275	3.99e-200	546	1408
1133	AT1G13080.1	AL1G24740.t1	0.0283007	0.19437	0.145602	NG	94	473	503	30	0	0	492	97.8	1	503	503	100	100	1	503	503	0	947	2449
1134	AT1G13090.2	AL1G24750.t1	0.0335434	0.131775	0.254551	NG	92.9	457	492	34	1	1	471	95.7	1	491	491	100	100	1	492	492	0	912	2356
1135	AT1G13100.1	AL1G24770.t1	0.0346808	0.149651	0.231744	NG	91.5	451	493	38	2	4	467	94.7	1	491	491	100	100	1	491	491	0	891	2302
1136	AT1G13110.1	AL1G24780.t1	0.023096	0.176317	0.130992	NG	93.9	474	505	31	0	0	488	96.6	1	505	505	100	100	1	505	505	0	944	2441
1137	AT1G13120.1	AL1G24790.t2	0.032173	0.138605	0.232119	NG	93.5	550	588	35	1	3	566	96.3	1	588	612	96.1	96.1	47	631	655	0	945	2442
1138	AT1G13130.1	AL1G24800.t1	0.0193382	0.170481	0.113433	NG	96	523	545	22	0	0	533	97.8	9	553	553	98.6	98.6	1	545	545	0	1074	2777
1139	AT1G13140.1	AL1G24810.t1	0.0210597	0.220678	0.0954319	NG	95.3	503	528	25	0	0	516	97.7	8	535	535	98.7	98.7	1	528	528	0	1031	2665
1140	AT1G13150.1	AL1G24830.t1	0.0201253	0.137922	0.145919	NG	95.5	506	530	24	0	0	521	98.3	1	530	530	100	100	1	530	530	0	1036	2679
1141	AT1G13160.1	AL7G20520.t1	0.112691	0.413484	0.272539	NG	61.1	571	935	205	9	159	642	68.7	1	805	805	100	100	1	906	906	0	913	2359
1142	AT1G13170.2	AL1G24850.t1	0.0125673	0.123817	0.101498	NG	94	795	846	20	4	31	805	95.2	1	838	838	100	100	1	823	823	0	1569	4063
1143	AT1G13180.1	AL1G24860.t1	0.00305011	0.101324	0.0301027	NG	99.3	425	428	3	0	0	426	99.5	1	428	428	100	100	1	428	428	0	863	2231
1144	AT1G13190.1	AL1G24870.t1	0.016719	0.120796	0.138407	NG	94.3	542	575	31	2	2	550	95.7	1	574	574	100	100	1	574	574	0	925	2390
1145	AT1G13195.1	AL1G24880.t1	0.0166604	0.146262	0.113908	NG	93.2	246	264	15	1	3	249	94.3	1	261	261	100	100	1	264	264	2.62e-176	485	1249
1146	AT1G13200.1	AL1G24890.t1	0.0806422	0.193031	0.417769	NG	87.9	299	340	40	1	1	316	92.9	32	371	436	78	78	35	373	374	3.81e-227	626	1614
1147	AT1G13220.3	AL1G24910.t1	0.0323457	0.0946927	0.341586	NG	84.3	975	1156	148	4	33	997	86.2	10	1142	1142	99.2	99.2	1	1146	1146	0	1139	2946
1148	AT1G13230.1	AL1G24920.t1	0.0328855	0.207208	0.158708	NG	94.6	402	425	22	1	1	409	96.2	1	425	425	100	100	1	424	424	1.48e-157	451	1160
1149	AT1G13245.1	AL1G24940.t1	NA	0.11322	0	NG	100	42	42	0	0	0	42	100	1	42	42	100	100	1	42	42	1.3e-24	84.7	208
1150	AT1G13250.1	AL1G24950.t1	0.0226426	0.182184	0.124284	NG	94.2	326	346	20	0	0	333	96.2	1	346	346	100	100	1	346	346	3.87e-245	666	1719
1151	AT1G13260.1	AL1G24970.t1	0.0151008	0.128082	0.117899	NG	97.1	335	345	10	0	0	340	98.6	1	345	345	100	100	1	345	345	5.93e-244	663	1711
1152	AT1G13270.1	AL1G24980.t1	0.0181249	0.138208	0.131142	NG	96.2	356	370	14	0	0	368	99.5	1	370	370	100	100	1	370	370	1.06e-261	710	1833
1153	AT1G13280.1	AL1G24992.t1	0.0303392	0.143069	0.212061	NG	93.7	237	253	16	0	0	242	95.7	3	255	255	99.2	99.2	1	253	253	3.87e-167	461	1187
1154	AT1G13290.1	AL1G25000.t1	0.0134819	0.101433	0.132914	NG	96.7	294	304	9	1	1	296	97.4	1	303	303	100	100	1	304	304	1.52e-216	590	1522
1155	AT1G13300.1	AL1G25060.t1	0.016746	0.126721	0.132149	NG	94.7	323	341	14	2	4	330	96.8	8	345	345	98	98	1	340	340	3.11e-215	590	1522
1156	AT1G13310.1	AL1G25070.t1	0.0564088	0.146037	0.386265	NG	88.3	331	375	41	1	3	353	94.1	1	375	375	100	100	1	372	372	3.72e-234	641	1653
1157	AT1G13320.2	AL1G25080.t1	0.018545	0.0990278	0.187271	NG	95	189	199	10	0	0	193	97	1	199	538	37	37	1	199	588	1.26e-121	369	948
1158	AT1G13330.1	AL1G25090.t1	0.011237	0.18537	0.0606195	NG	97.4	221	227	6	0	0	222	97.8	1	227	227	100	100	1	227	227	3.19e-132	371	952
1159	AT1G13340.1	AL1G25100.t1	0.0286066	0.0840863	0.340206	NG	89.9	373	415	37	2	5	383	92.3	1	410	410	100	100	1	415	415	3.1e-234	644	1662
1160	AT1G13360.1	AL1G25110.t1	0.0254113	0.160077	0.158745	NG	92.3	179	194	14	1	1	183	94.3	2	195	195	99.5	99.5	4	196	196	2.48e-109	310	795
1161	AT1G13380.1	AL1G25120.t1	0.0118358	0.236157	0.0501184	NG	98.4	186	189	3	0	0	186	98.4	1	189	189	100	100	1	189	189	2.44e-131	365	938
1162	AT1G13390.1	AL1G25130.t1	0.0310697	0.112229	0.276842	NG	89.8	159	177	15	1	3	165	93.2	1	177	177	100	100	1	174	174	6.83e-111	313	801
1163	AT1G13400.1	AL1G25160.t2	0.0592	0.158864	0.372645	NG	79	169	214	39	3	6	172	80.4	1	208	208	100	100	19	232	232	1.12e-112	321	822
1164	AT1G13410.1	AL1G25170.t2	0.0729578	0.168772	0.432285	NG	90.6	397	438	41	0	0	404	92.2	34	471	475	92.2	92.2	51	488	492	9.76e-210	588	1516
1165	AT1G13420.1	AL1G25180.t1	0.0429872	0.174009	0.24704	NG	88.3	293	332	32	1	7	311	93.7	1	332	332	100	100	1	325	325	5.51e-218	596	1537
1166	AT1G13430.1	AL1G25190.t1	0.0638536	0.165376	0.386113	NG	86.1	303	352	46	1	3	324	92	1	352	352	100	100	1	349	349	1.04e-217	597	1540
1167	AT1G13440.1	AL1G25200.t1	0.0025671	0.146061	0.0175756	NG	99.4	337	339	2	0	0	339	100	1	339	339	100	100	1	339	339	1.35e-246	669	1727
1168	AT1G13450.1	AL1G25210.t1	0.0160907	0.123355	0.130442	NG	90.2	370	410	33	5	7	376	91.7	1	407	407	100	100	1	406	406	3.67e-253	692	1785
1169	AT1G13460.1	AL1G25220.t1	0.0145629	0.216846	0.0671578	NG	96.4	478	496	15	1	3	487	98.2	1	493	493	100	100	1	496	496	0	912	2357
1170	AT1G13470.1	AL1G25240.t1	0.0517666	0.120329	0.43021	NG	86.4	337	390	43	1	10	358	91.8	1	380	380	100	100	1	390	390	2.2e-250	683	1762
1171	AT1G13480.1	AL1G25260.t1	0.0364337	0.143246	0.254343	NG	93.6	363	388	24	1	1	374	96.4	1	388	388	100	100	1	387	387	1.37e-275	747	1928
1172	AT1G13510.1	AL1G25250.t1	0.0706971	0.208021	0.339856	NG	83.2	306	368	42	2	20	323	87.8	1	368	381	96.6	96.6	1	348	1058	4.07e-213	613	1580
1173	AT1G13520.1	AL1G25270.t1	0.0455053	0.132609	0.343155	NG	90.7	352	388	36	0	0	368	94.8	1	388	388	100	100	1	388	388	1.52e-270	734	1895
1174	AT1G13530.1	AL1G25280.t1	0.028388	0.169125	0.167852	NG	93.5	362	387	24	1	1	372	96.1	1	386	386	100	100	1	387	387	1.8e-275	746	1927
1175	AT1G13560.1	AL1G25300.t1	0.00339041	0.128144	0.0264578	NG	99.2	387	390	3	0	0	389	99.7	1	390	390	100	100	1	390	390	9.51e-291	785	2028
1176	AT1G13570.1	AL1G25310.t1	0.025912	0.123197	0.21033	NG	95	396	417	21	0	0	407	97.6	1	417	417	100	100	1	417	417	1.65e-291	790	2039
1177	AT1G13580.2	AL1G25320.t1	0.00693997	0.107212	0.0647312	NG	98.4	304	309	5	0	0	308	99.7	1	309	309	100	100	1	309	309	3.92e-224	610	1573
1178	AT1G13590.1	AL1G25330.t1	0.00644391	0.0224834	0.286607	NG	95.7	67	70	1	1	2	67	95.7	21	88	88	77.3	77.3	1	70	70	7.07e-41	128	322
1179	AT1G13600.1	AL1G25340.t1	0.0250679	0.159883	0.156789	NG	86.3	170	197	27	0	0	174	88.3	1	197	197	100	100	1	197	197	1.62e-80	238	606
1180	AT1G13605.1	AL1G25360.t1	0.116178	0.129161	0.899481	NG	78.8	82	104	22	0	0	90	86.5	1	104	104	100	100	1	104	104	7.89e-60	178	451
1181	AT1G13607.1	AL1G25370.t1	0.141086	0.173634	0.812546	NG	75.7	53	70	17	0	0	58	82.9	1	70	73	95.9	95.9	1	70	79	1.03e-33	110	274
1182	AT1G13609.1	AL1G25392.t1	0.0399667	0.236931	0.168685	NG	92.4	73	79	6	0	0	77	97.5	1	79	79	100	100	1	79	79	5.16e-49	149	375
1183	AT1G13610.1	AL1G25394.t1	0.0271083	0.122532	0.221235	NG	93.6	338	361	21	2	2	347	96.1	1	359	359	100	100	1	361	361	7.54e-250	679	1753
1184	AT1G13620.1	AL1G25400.t1	0.0416766	0.119308	0.349321	NG	84.8	95	112	15	1	2	97	86.6	1	110	110	100	100	1	112	112	7.7e-52	158	400
1185	AT1G13630.4	AL1G25410.t1	0.0455567	0.11212	0.406319	NG	89.2	741	831	90	0	0	759	91.3	1	831	832	99.9	99.9	1	831	833	3.36e-166	503	1294
1186	AT1G13635.1	AL1G25420.t1	0.0235336	0.133511	0.176267	NG	92.1	291	316	20	2	5	299	94.6	1	312	312	100	100	1	315	315	8.09e-201	551	1421
1187	AT1G13650.3	AL1G25440.t1	0.115722	0.162026	0.714218	NG	85.5	194	227	26	2	7	203	89.4	62	282	282	78.4	78.4	1	226	226	1.84e-57	183	465
1188	AT1G13670.1	AL1G25450.t1	0.0542438	0.252406	0.214907	NG	85.6	196	229	24	3	9	204	89.1	1	226	226	100	100	1	223	223	3.15e-124	350	899
1189	AT1G13680.1	AL1G25460.t1	0.0197217	0.125952	0.156581	NG	95.6	262	274	12	0	0	269	98.2	74	347	347	79	79	1	274	274	3.39e-199	547	1410
1190	AT1G13690.1	AL1G25480.t1	0.0120257	0.136901	0.087842	NG	97.2	173	178	5	0	0	177	99.4	1	178	178	100	100	1	178	178	1.74e-121	340	871
1191	AT1G13700.1	AL1G25490.t1	0.0171065	0.16073	0.10643	NG	96.3	259	269	10	0	0	265	98.5	1	269	269	100	100	1	269	269	7.1e-191	523	1346
1192	AT1G13710.1	AL1G25500.t1	0.0190985	0.180841	0.105609	NG	95.8	497	519	21	1	1	503	96.9	1	518	518	100	100	1	519	519	0	981	2537
1193	AT1G13730.1	AL1G25520.t1	0.0588696	0.181659	0.324066	NG	85	367	432	59	2	6	384	88.9	1	428	429	99.8	99.8	1	430	438	1.95e-229	634	1635
1194	AT1G13740.1	AL1G25530.t1	0.0457893	0.229076	0.199887	NG	84.2	294	349	27	4	28	302	86.5	1	349	349	100	100	1	321	321	6.6e-195	538	1387
1195	AT1G13750.1	AL1G25540.t1	0.0250813	0.164354	0.152605	NG	94.3	579	614	35	0	0	599	97.6	1	614	614	100	100	1	614	614	0	1215	3144
1196	AT1G13755.1	AL1G25550.t2	0.112191	0.304617	0.368301	NG	77.5	79	102	21	2	2	89	87.3	1	100	120	83.3	83.3	1	102	239	1.34e-50	160	404
1197	AT1G13770.1	AL1G25570.t1	0.0180953	0.117257	0.154321	NG	96.1	424	441	17	0	0	430	97.5	1	441	441	100	100	1	441	441	5.09e-305	826	2133
1198	AT1G13780.1	AL1G25580.t1	0.0723026	0.145401	0.497263	NG	86.4	388	449	61	0	0	413	92	6	454	457	98.2	98.2	1	449	455	3.13e-286	780	2013
1199	AT1G13790.1	AL1G25590.t1	0.0420943	0.116187	0.362296	NG	87.8	647	737	87	1	3	676	91.7	1	737	737	100	100	1	734	734	0	1251	3236
1200	AT1G13800.1	AL1G25600.t1	0.055975	0.16386	0.341602	NG	87.9	777	884	107	0	0	808	91.4	1	884	884	100	100	1	884	884	3.03e-272	778	2010
1201	AT1G13810.1	AL1G25610.t1	0.0490579	0.167654	0.292614	NG	89.5	272	304	32	0	0	285	93.8	1	304	304	100	100	1	304	304	8.77e-214	583	1504
1202	AT1G13820.1	AL1G25620.t1	0.0195659	0.166573	0.117461	NG	95.3	322	338	14	1	2	331	97.9	1	338	340	99.4	99.4	1	336	338	2.41e-240	654	1686
1203	AT1G13830.1	AL1G25650.t1	0.0322502	0.149568	0.215622	NG	86	172	200	26	1	2	177	88.5	1	198	198	100	100	1	200	200	3.58e-106	303	775
1204	AT1G13860.1	AL5G13240.t1	0.0643722	0.563112	0.114315	NG	82.8	510	616	77	5	29	548	89	2	604	604	99.8	99.8	8	607	607	0	1029	2660
1205	AT1G13870.1	AL1G25700.t1	0.0131107	0.144138	0.0909597	NG	97	294	303	9	0	0	297	98	1	303	303	100	100	1	303	303	1.1e-211	578	1490
1206	AT1G13880.1	AL1G25710.t1	0.0350002	0.168462	0.207763	NG	89.2	380	426	43	3	3	392	92	1	425	425	100	100	1	424	424	3.39e-281	764	1973
1207	AT1G13890.1	AL1G25720.t1	0.0130346	0.135067	0.0965046	NG	95.8	254	265	10	1	1	256	96.6	1	264	264	100	100	1	265	265	1.81e-168	466	1198
1208	AT1G13910.1	AL1G25740.t1	0.0330162	0.155449	0.212393	NG	95.5	316	331	15	0	0	322	97.3	1	331	331	100	100	1	331	331	1.28e-85	261	666
1209	AT1G13920.1	AL1G25750.t1	0.0318942	0.125074	0.255003	NG	93.1	322	346	24	0	0	330	95.4	1	346	346	100	100	1	346	346	1.32e-197	546	1407
1210	AT1G13930.1	AL1G25770.t1	0.0112873	0.109524	0.103058	NG	85.4	134	157	22	1	1	135	86	1	156	156	100	100	1	157	157	1.37e-71	212	539
1211	AT1G13940.1	AL1G25780.t1	0.034393	0.114331	0.30082	NG	90.9	921	1013	80	9	12	946	93.4	1	1006	1006	100	100	1	1008	1008	0	1778	4604
1212	AT1G13950.1	AL1G25790.t1	0.00815892	0.183774	0.0443965	NG	98.7	157	159	2	0	0	157	98.7	1	159	159	100	100	1	159	159	4.79e-112	314	805
1213	AT1G13960.1	AL1G25800.t1	0.0142507	0.0990236	0.143912	NG	95.7	493	515	18	1	4	500	97.1	1	515	515	100	100	1	511	511	0	944	2439
1214	AT1G13970.1	AL1G25810.t1	0.00631758	0.1539	0.0410499	NG	98.4	498	506	7	1	1	501	99	1	505	505	100	100	1	506	506	0	976	2523
1215	AT1G13980.1	AL1G25820.t1	0.00508579	0.119082	0.0427083	NG	98.7	1436	1455	16	1	3	1447	99.5	1	1452	1452	100	100	1	1455	1455	0	2823	7318
1216	AT1G13990.1	AL1G25830.t1	0.0320773	0.213751	0.150068	NG	93.2	259	278	18	1	1	264	95	1	278	278	100	100	1	277	277	1.9e-165	459	1181
1217	AT1G14000.1	AL1G25840.t1	0.00297852	0.0980005	0.0303929	NG	99.3	436	439	3	0	0	438	99.8	1	439	439	100	100	1	439	439	0	894	2310
1218	AT1G14010.1	AL1G25850.t1	0.0308914	0.15803	0.195479	NG	94.8	202	213	11	0	0	207	97.2	1	213	213	100	100	1	213	213	3.52e-145	402	1034
1219	AT1G14020.1	AL1G25860.t1	0.0275939	0.112793	0.244642	NG	94.1	465	494	28	1	1	477	96.6	1	493	500	98.6	98.6	1	494	498	0	950	2456
1220	AT1G14030.1	AL1G25870.t1	0.0197131	0.125842	0.15665	NG	96.2	461	479	18	0	0	471	98.3	5	483	483	99.2	99.2	10	488	488	0	913	2359
1221	AT1G14048.1	AL1G25910.t1	0.281727	0.341456	0.825075	NG	72.1	49	68	18	1	1	55	80.9	1	68	102	66.7	66.7	103	169	184	1.64e-29	103	258
1222	AT1G14060.1	AL1G25920.t1	0.0350772	0.096465	0.363626	NG	82.7	158	191	16	4	17	163	85.3	1	180	180	100	100	1	185	185	5.64e-81	238	606
1223	AT1G14080.1	AL1G25935.t1	0.0154718	0.142332	0.108702	NG	96.4	514	533	18	1	1	527	98.9	7	538	538	98.9	98.9	594	1126	1126	0	1048	2710
1224	AT1G14110.1	AL1G25980.t1	0.0283972	0.180208	0.15758	NG	86.3	442	512	30	2	40	450	87.9	3	475	475	99.6	99.6	2	512	512	0	870	2249
1225	AT1G14120.1	AL1G25990.t1	0.0402375	0.174705	0.230317	NG	88.8	286	322	27	1	9	305	94.7	1	313	313	100	100	1	322	322	7.04e-213	582	1501
1226	AT1G14130.1	AL1G26000.t1	0.0226932	0.132933	0.170711	NG	94.5	292	309	16	1	1	300	97.1	1	309	309	100	100	1	308	308	9.14e-216	589	1518
1227	AT1G14140.1	AL1G26010.t1	0.0190849	0.168639	0.11317	NG	95.8	293	306	13	0	0	297	97.1	1	306	306	100	100	1	306	306	1.39e-211	578	1490
1228	AT1G14150.1	AL1G26020.t1	0.0279844	0.191555	0.14609	NG	93.7	179	191	11	1	1	182	95.3	1	191	191	100	100	1	190	190	1.4e-124	348	894
1229	AT1G14160.1	AL1G26030.t1	0.0182733	0.128951	0.141707	NG	97.8	179	183	4	0	0	183	100	28	210	210	87.1	87.1	36	218	218	2.35e-116	330	845
1230	AT1G14170.3	AL1G26040.t1	0.019296	0.173872	0.110978	NG	95.6	459	480	19	2	2	470	97.9	1	480	480	100	100	1	478	478	0	879	2271
1231	AT1G14180.1	AL1G26050.t1	0.124248	0.261602	0.47495	NG	87.3	234	268	25	4	9	240	89.6	1	260	349	74.5	74.5	1	267	300	3.65e-166	465	1196
1232	AT1G14190.1	AL1G26070.t1	0.0319358	0.210591	0.151648	NG	93.2	468	502	33	1	1	482	96	1	502	502	100	100	1	501	501	0	933	2412
1233	AT1G14200.1	AL1G26080.t1	0.0613464	0.253536	0.241963	NG	80.4	144	179	29	1	6	150	83.8	1	179	180	99.4	99.4	1	173	182	2.56e-104	296	759
1234	AT1G14205.1	AL1G26090.t1	0.0317047	0.109835	0.288658	NG	94.6	157	166	8	1	1	162	97.6	5	170	170	97.6	97.6	5	169	169	1.69e-108	306	784
1235	AT1G14210.1	AL1G26100.t1	0.0384893	0.149834	0.25688	NG	91.5	227	248	21	0	0	237	95.6	1	248	248	100	100	1	248	248	3.81e-180	494	1271
1236	AT1G14220.1	AL1G26110.t1	0.0355313	0.200559	0.177161	NG	92.1	211	229	16	1	2	218	95.2	1	229	229	100	100	1	227	227	4.14e-165	454	1168
1237	AT1G14230.1	AL1G26120.t1	0.0423487	0.103959	0.407361	NG	91.2	458	502	44	0	0	477	95	1	502	504	99.6	99.6	1	502	504	0	900	2327
1238	AT1G14240.1	AL1G26130.t1	0.0473421	0.113947	0.415476	NG	86.6	412	476	62	1	2	437	91.8	1	474	484	97.9	97.9	1	476	600	4.55e-303	829	2142
1239	AT1G14260.1	AL1G26140.t1	0.0323356	0.194314	0.166409	NG	85.6	232	271	17	4	22	242	89.3	1	266	266	100	100	1	254	254	3.75e-152	424	1090
1240	AT1G14270.1	AL1G26150.t1	0.0219748	0.14627	0.150235	NG	95	324	341	15	1	2	326	95.6	14	354	354	96.3	96.3	1	339	339	2.78e-227	621	1602
1241	AT1G14280.1	AL1G26160.t1	0.0248709	0.145458	0.170983	NG	93.5	418	447	25	1	4	429	96	1	443	443	100	100	1	447	447	2.1e-283	771	1992
1242	AT1G14290.1	AL1G26170.t1	0.00837401	0.0712383	0.117549	NG	98.5	256	260	4	0	0	259	99.6	1	260	260	100	100	1	260	260	9.74e-189	516	1330
1243	AT1G14300.1	AL1G26180.t1	0.0136805	0.122971	0.11125	NG	97.1	330	340	10	0	0	334	98.2	1	340	340	100	100	1	340	340	2.01e-228	624	1608
1244	AT1G14310.1	AL1G26190.t1	0.0173839	0.0883052	0.196861	NG	96.1	245	255	10	0	0	253	99.2	1	255	255	100	100	1	255	255	4.8e-182	499	1285
1245	AT1G14320.1	AL1G26200.t1	NA	0.146394	0	NG	100	221	221	0	0	0	221	100	1	221	221	100	100	1	221	221	8.39e-166	455	1171
1246	AT1G14330.1	AL1G26210.t1	0.0260305	0.199034	0.130784	NG	92.2	411	446	26	3	9	421	94.4	1	442	442	100	100	1	441	441	1.1e-274	749	1934
1247	AT1G14340.1	AL1G26220.t1	0.0256221	0.178568	0.143486	NG	94.3	231	245	14	0	0	237	96.7	1	245	245	100	100	1	245	245	3.15e-157	436	1120
1248	AT1G14345.1	AL1G26230.t1	0.022254	0.246408	0.0903135	NG	95.4	188	197	9	0	0	190	96.4	1	197	197	100	100	1	197	197	1.38e-125	352	902
1249	AT1G14350.1	AL1G26240.t1	0.0220491	0.13428	0.164203	NG	90.9	399	439	38	2	2	410	93.4	1	437	437	100	100	1	439	439	1.05e-284	774	1999
1250	AT1G14360.1	AL1G26250.t1	0.00525704	0.181563	0.0289543	NG	99.1	329	332	3	0	0	331	99.7	1	332	332	100	100	1	332	332	2.73e-247	671	1730
1251	AT1G14370.1	AL1G26260.t1	0.0114712	0.133034	0.0862278	NG	96.5	412	427	15	0	0	419	98.1	1	427	427	100	100	1	427	427	5.35e-293	794	2051
1252	AT1G14380.7	AL1G26270.t1	0.0427953	0.0950595	0.450195	NG	70.6	468	663	106	4	89	488	73.6	1	575	575	100	100	1	662	662	1.27e-275	766	1978
1253	AT1G14390.1	AL1G26280.t1	0.0283578	0.146805	0.193167	NG	92.2	675	732	52	3	5	695	94.9	1	729	729	100	100	1	730	730	0	1098	2840
1254	AT1G14400.1	AL1G26290.t1	NA	0.0842897	0	NG	100	153	153	0	0	0	153	100	1	153	153	100	100	1	153	153	5.25e-113	316	810
1255	AT1G14410.1	AL1G26300.t1	0.0228759	0.110485	0.20705	NG	94.7	251	265	13	1	1	257	97	1	264	264	100	100	1	265	265	2.86e-181	498	1282
1256	AT1G14420.1	AL1G26310.t1	0.0251675	0.141513	0.177846	NG	95.2	438	460	22	0	0	446	97	1	460	460	100	100	1	460	460	0	911	2355
1257	AT1G14430.1	AL1G26320.t1	0.0230595	0.17267	0.133546	NG	95.4	539	565	26	0	0	550	97.3	1	565	565	100	100	1	565	565	0	1108	2865
1258	AT1G14440.1	AL1G26330.t1	0.0101623	0.0999786	0.101644	NG	92.3	289	313	23	1	1	292	93.3	1	313	313	100	100	1	312	312	6.71e-188	519	1336
1259	AT1G14450.1	AL1G26340.t1	NA	0.127414	0	NG	100	74	74	0	0	0	74	100	1	74	74	100	100	1	74	74	1.86e-51	154	390
1260	AT1G14455.1	AL1G26350.t1	0.0832888	0.0953158	0.873819	NG	81.7	76	93	13	2	4	79	84.9	1	93	98	94.9	94.9	1	89	91	6.52e-25	89.4	220
1261	AT1G14460.1	AL5G11750.t1	0.154598	0.590088	0.261992	NG	65.2	808	1239	284	30	147	928	74.9	1	1116	1117	99.9	99.9	1	1215	1223	0	1350	3493
1262	AT1G14470.1	AL1G26370.t1	0.0424527	0.163835	0.259119	NG	84.8	457	539	80	1	2	471	87.4	1	537	541	99.3	99.3	1	539	544	2.9e-272	751	1940
1263	AT1G14490.2	AL1G26390.t1	0.0420197	0.11615	0.361772	NG	84.3	193	229	28	4	8	198	86.5	1	222	226	98.2	98.2	1	228	232	4.08e-129	363	932
1264	AT1G14510.1	AL1G26400.t1	0.0135193	0.137778	0.0981234	NG	97.6	247	253	6	0	0	252	99.6	1	253	253	100	100	1	253	253	2.86e-173	477	1227
1265	AT1G14520.1	AL1G26490.t1	0.0190898	0.218062	0.0875431	NG	95.8	299	312	13	0	0	303	97.1	1	312	312	100	100	1	312	312	8.92e-227	617	1591
1266	AT1G14520.2	AL1G26490.t2	0.019212	0.219857	0.087384	NG	95.8	297	310	13	0	0	301	97.1	1	310	310	100	100	1	310	310	1.27e-225	614	1583
1267	AT1G14530.2	AL1G26500.t1	0.0104672	0.104206	0.100448	NG	97	287	296	7	1	2	290	98	1	294	294	100	100	1	296	296	1.43e-203	557	1435
1268	AT1G14540.1	AL1G26510.t1	0.0175719	0.229271	0.0766425	NG	96.2	305	317	11	1	1	310	97.8	1	316	316	100	100	1	317	317	3.41e-215	588	1516
1269	AT1G14550.1	AL1G26520.t1	0.0115812	0.241481	0.0479592	NG	97.4	260	267	7	0	0	262	98.1	56	322	322	82.9	82.9	1	267	267	3.71e-188	518	1334
1270	AT1G14560.1	AL1G26530.t1	0.00538712	0.103694	0.051952	NG	98.8	328	332	4	0	0	330	99.4	1	332	332	100	100	1	332	332	1.9e-238	648	1672
1271	AT1G14570.1	AL1G26540.t1	0.0169873	0.142022	0.11961	NG	90.7	429	473	40	1	4	435	92	1	469	469	100	100	1	473	473	1.66e-300	817	2110
1272	AT1G14580.1	AL1G26550.t1	0.0386049	0.123076	0.313666	NG	90.6	424	468	40	3	4	434	92.7	1	468	468	100	100	1	464	464	1.06e-289	789	2038
1273	AT1G14590.1	AL1G26560.t1	0.0204696	0.183849	0.111339	NG	95.3	369	387	15	1	3	374	96.6	1	387	387	100	100	1	384	384	2.27e-273	741	1913
1274	AT1G14600.1	AL1G26570.t1	0.0222889	0.100543	0.221684	NG	94.6	243	257	12	2	2	246	95.7	1	256	256	100	100	1	256	256	1.08e-135	382	981
1275	AT1G14610.1	AL1G26580.t1	0.0191328	0.127164	0.150458	NG	95.7	1061	1109	48	0	0	1088	98.1	1	1109	1109	100	100	1	1109	1109	0	2118	5488
1276	AT1G14620.1	AL1G26590.t1	0.00917711	0.106694	0.0860133	NG	97.9	229	234	5	0	0	232	99.1	1	234	234	100	100	1	234	234	2.58e-171	470	1210
1277	AT1G14630.1	AL1G26600.t1	0.0283763	0.174606	0.162516	NG	93.8	213	227	14	0	0	220	96.9	1	227	227	100	100	1	227	227	1.04e-153	425	1093
1278	AT1G14650.1	AL1G26610.t1	0.0799344	0.291293	0.274412	NG	78.2	619	792	154	9	19	657	83	1	786	786	100	100	1	779	779	0	1093	2828
1279	AT1G14660.1	AL1G26630.t1	0.0405638	0.159718	0.253972	NG	89.8	680	757	55	2	22	698	92.2	1	757	757	100	100	1	735	735	0	1303	3373
1280	AT1G14670.1	AL5G11150.t1	0.0376206	0.685718	0.0548631	NG	93.3	553	593	40	0	0	579	97.6	1	593	593	100	100	1	593	593	0	1105	2859
1281	AT1G14680.1	AL1G26650.t1	0.0324522	0.218193	0.148731	NG	87.3	254	291	36	1	1	263	90.4	1	291	291	100	100	1	290	290	1.09e-145	410	1054
1282	AT1G14685.1	AL1G26660.t1	0.0108392	0.209531	0.0517307	NG	85	238	280	40	2	2	239	85.4	1	280	280	100	100	1	278	278	2.41e-155	434	1115
1283	AT1G14686.1	AL1G26670.t1	0.0489233	0.233273	0.209725	NG	87.8	302	344	36	3	6	313	91	1	340	340	100	100	1	342	342	1.99e-201	555	1431
1284	AT1G14687.1	AL1G26680.t1	0.0323418	0.124321	0.260148	NG	91.7	155	169	14	0	0	161	95.3	1	169	169	100	100	1	169	169	1.13e-99	284	726
1285	AT1G14688.1	AL1G26690.t1	0.226714	0.298366	0.759854	NG	72	90	125	34	1	1	109	87.2	42	165	171	72.5	72.5	28	152	155	5.22e-56	173	438
1286	AT1G14700.1	AL1G26710.t2	0.0225002	0.204053	0.110266	NG	94.4	319	338	17	2	2	328	97	31	367	367	91.8	91.8	1	337	337	3.56e-242	659	1701
1287	AT1G14700.3	AL1G26710.t1	0.0166092	0.184926	0.0898151	NG	95.6	260	272	10	2	2	265	97.4	1	271	271	100	100	1	271	271	2.31e-197	539	1389
1288	AT1G14710.1	AL1G26720.t1	0.028312	0.149035	0.189968	NG	87.5	547	625	48	11	30	561	89.8	1	602	602	100	100	1	618	618	0	1012	2617
1289	AT1G14720.1	AL1G26730.t1	0.0242446	0.227525	0.106558	NG	94.9	298	314	16	0	0	307	97.8	11	324	333	94.3	94.3	1	314	316	1.07e-229	625	1613
1290	AT1G14730.1	AL1G26740.t1	0.00895398	0.092617	0.0966775	NG	98.2	221	225	4	0	0	223	99.1	1	225	225	100	100	1	225	225	5.21e-162	446	1147
1291	AT1G14740.1	AL1G26750.t1	0.00758909	0.159102	0.0476995	NG	97.7	722	739	11	3	6	729	98.6	1	734	734	100	100	1	738	738	0	1358	3516
1292	AT1G14750.1	AL1G26770.t1	0.0174436	0.110194	0.158299	NG	92.1	536	582	43	2	3	543	93.3	1	579	579	100	100	1	582	582	0	963	2489
1293	AT1G14755.1	AL1G26780.t1	0.0449876	0.0832108	0.540647	NG	89.9	71	79	8	0	0	73	92.4	1	79	79	100	100	1	79	79	1.86e-51	155	391
1294	AT1G14760.2	AL1G26790.t1	0.0347818	0.119748	0.290457	NG	92.1	129	140	10	1	1	134	95.7	1	139	139	100	100	1	140	140	2.99e-83	240	612
1295	AT1G14770.1	AL1G26800.t1	0.0674081	0.131851	0.511246	NG	77.5	335	432	76	4	21	358	82.9	1	430	430	100	100	1	413	413	1.26e-212	590	1522
1296	AT1G14780.1	AL1G26810.t1	0.0118645	0.165874	0.0715271	NG	96.8	612	632	16	1	4	619	97.9	1	628	628	100	100	1	632	632	0	1251	3237
1297	AT1G14790.1	AL1G26820.t1	0.0256019	0.161077	0.158942	NG	94.9	1052	1109	55	2	2	1075	96.9	1	1108	1108	100	100	1	1108	1108	0	2097	5432
1298	AT1G14800.1	AL1G39460.t1	0.0624809	0.316267	0.197557	NG	89	162	182	17	1	3	171	94	1	179	385	46.5	46.5	1	182	192	1.98e-110	321	822
1299	AT1G14810.1	AL1G26830.t1	0.00821507	0.103793	0.0791488	NG	98.1	369	376	7	0	0	373	99.2	1	376	376	100	100	1	376	376	6.4e-266	721	1862
1300	AT1G14820.3	AL1G26840.t1	0.0173871	0.0914831	0.190058	NG	96	243	253	10	0	0	250	98.8	1	253	253	100	100	1	253	253	8.92e-177	486	1250
1301	AT1G14840.1	AL1G26860.t1	0.0111951	0.118808	0.0942282	NG	97.2	588	605	16	1	1	598	98.8	1	605	605	100	100	1	604	604	0	960	2482
1302	AT1G14850.1	AL1G26870.t1	0.0184786	0.101882	0.181374	NG	96.1	1409	1466	52	2	5	1433	97.7	1	1465	1465	100	100	1	1462	1462	0	2703	7007
1303	AT1G14860.1	AL1G26880.t1	0.0452764	0.0992549	0.456162	NG	90.3	158	175	17	0	0	169	96.6	1	175	177	98.9	98.9	1	175	177	2.47e-116	327	837
1304	AT1G14870.1	AL1G26900.t1	0.0527947	0.288041	0.183289	NG	89.5	137	153	16	0	0	146	95.4	1	153	153	100	100	1	153	153	7.18e-111	311	796
1305	AT1G14890.1	AL1G26920.t1	0.0269369	0.147388	0.182761	NG	94.1	190	202	12	0	0	193	95.5	19	220	220	91.8	91.8	1	202	202	1.58e-129	363	931
1306	AT1G14900.1	AL1G26930.t1	0.0294991	0.20032	0.14726	NG	83.5	172	206	30	2	4	175	85	1	205	205	100	100	1	203	203	2.03e-89	261	666
1307	AT1G14910.1	AL1G26960.t1	0.0330834	0.180512	0.183275	NG	94.9	526	554	28	0	0	538	97.1	1	554	693	79.9	79.9	1	554	676	0	1045	2701
1308	AT1G14920.1	AL1G26970.t1	0.0153238	0.203355	0.0753547	NG	91.8	490	534	43	1	1	496	92.9	1	534	534	100	100	1	533	533	0	924	2387
1309	AT1G14930.1	AL1G26980.t1	0.0447411	0.187124	0.239098	NG	91.7	143	156	13	0	0	148	94.9	1	156	156	100	100	1	156	156	8.65e-109	306	783
1310	AT1G14940.1	AL1G27000.t1	0.0245666	0.210517	0.116696	NG	94.2	147	156	9	0	0	152	97.4	1	156	156	100	100	1	156	156	1.33e-112	315	808
1311	AT1G14950.1	AL1G27010.t1	0.0135935	0.193448	0.0702694	NG	96.8	151	156	5	0	0	155	99.4	1	156	156	100	100	1	156	156	7.13e-117	326	836
1312	AT1G14960.1	AL1G27020.t1	0.0320894	0.308531	0.104007	NG	92.9	143	154	11	0	0	150	97.4	1	154	154	100	100	1	154	154	2.59e-109	307	786
1313	AT1G14970.1	AL1G27030.t1	0.0125333	0.0941151	0.13317	NG	97.3	548	563	14	1	1	557	98.9	1	563	563	100	100	1	562	562	0	1108	2865
1314	AT1G14980.1	AL1G27040.t1	NA	0.227315	0	NG	100	99	99	0	0	0	99	100	1	99	99	100	100	1	99	99	7.48e-67	195	496
1315	AT1G14990.1	AL1G27050.t1	0.0253896	0.246755	0.102894	NG	95.1	117	123	6	0	0	121	98.4	1	123	123	100	100	1	123	123	7.83e-87	248	632
1316	AT1G15000.1	AL1G27060.t1	0.0380992	0.271653	0.140249	NG	91.9	410	446	35	1	1	429	96.2	1	445	445	100	100	1	446	446	6.61e-301	816	2107
1317	AT1G15010.1	AL1G27070.t1	0.0462055	0.14496	0.318746	NG	90	126	140	14	0	0	133	95	4	143	143	97.9	97.9	5	144	144	2.16e-87	251	640
1318	AT1G15020.2	AL1G27090.t1	0.0219604	0.11893	0.184649	NG	95.1	503	529	26	0	0	523	98.9	1	529	529	100	100	1	529	529	0	1038	2683
1319	AT1G15030.1	AL1G27100.t1	0.0357184	0.191416	0.186601	NG	92.5	334	361	27	0	0	341	94.5	1	361	361	100	100	1	361	361	2.92e-243	663	1710
1320	AT1G15040.1	AL1G27110.t1	0.0248806	0.234572	0.106068	NG	95.2	377	396	19	0	0	381	96.2	1	396	396	100	100	1	396	396	9.91e-271	735	1898
1321	AT1G15050.2	AL1G27120.t1	0.0475155	0.0896157	0.530214	NG	89.6	138	154	16	0	0	144	93.5	1	154	154	100	100	1	154	154	3.54e-107	301	772
1322	AT1G15060.1	AL1G27130.t1	0.0155902	0.129512	0.120377	NG	96	556	579	20	2	3	567	97.9	1	579	579	100	100	1	576	576	0	1067	2759
1323	AT1G15080.1	AL1G27140.t1	0.0121871	0.209125	0.0582763	NG	97.6	282	289	7	0	0	287	99.3	1	289	291	99.3	99.3	1	289	313	5.54e-218	594	1531
1324	AT1G15100.1	AL1G27160.t1	0.0175138	0.125617	0.139422	NG	95.5	149	156	5	1	2	151	96.8	1	156	156	100	100	1	154	154	3.04e-104	294	753
1325	AT1G15110.1	AL1G27170.t1	0.00614348	0.114749	0.0535385	NG	98.4	419	426	6	1	1	423	99.3	1	426	426	100	100	1	425	425	0	885	2287
1326	AT1G15120.1	AL1G27180.t1	0.0122865	0.126726	0.096953	NG	98.6	68	69	1	0	0	68	98.6	2	70	70	98.6	98.6	2	70	70	2.33e-50	151	382
1327	AT1G15125.1	AL1G27190.t1	0.0398863	0.151773	0.262803	NG	93.8	241	257	16	0	0	248	96.5	1	257	352	73	73	1	257	269	6.91e-176	488	1257
1328	AT1G15130.1	AL1G27200.t1	0.0166015	0.104172	0.159366	NG	94.1	797	847	49	1	1	816	96.3	1	847	847	100	100	1	846	846	0	1448	3749
1329	AT1G15140.1	AL1G27210.t1	0.0160701	0.160773	0.099955	NG	94.6	280	296	16	0	0	287	97	1	296	296	100	100	1	296	296	4.08e-199	546	1406
1330	AT1G15160.1	AL1G27220.t1	0.044092	0.13864	0.318033	NG	90.6	442	488	46	0	0	464	95.1	1	488	488	100	100	1	488	488	1.55e-305	859	2219
1331	AT1G15170.1	AL1G27240.t1	0.0148443	0.1425	0.104171	NG	96.3	466	484	16	1	2	474	97.9	1	482	482	100	100	1	484	484	0	897	2317
1332	AT1G15180.1	AL1G27260.t1	0.0281538	0.153455	0.183466	NG	93.8	453	483	30	0	0	465	96.3	1	483	483	100	100	1	483	483	0	878	2268
1333	AT1G15190.1	AL1G27270.t1	0.0205801	0.154712	0.133022	NG	94.4	235	249	11	1	3	241	96.8	1	249	249	100	100	1	246	246	7.24e-162	447	1151
1334	AT1G15200.1	AL1G27280.t1	0.0304477	0.117953	0.258135	NG	93.2	395	424	26	1	3	406	95.8	1	424	424	100	100	1	421	421	2.62e-261	714	1842
1335	AT1G15200.3	AL1G27280.t2	0.0763722	0.160008	0.477304	NG	85.1	401	471	52	3	18	418	88.7	1	471	471	100	100	1	453	453	1.05e-257	708	1827
1336	AT1G15210.1	AL2G16880.t1	0.0870646	1.03433	0.084175	NG	84.6	1244	1470	199	6	27	1355	92.2	1	1443	1443	100	100	1	1470	1470	0	2476	6416
1337	AT1G15215.2	AL1G27300.t1	0.0410339	0.141127	0.290759	NG	89.2	231	259	19	1	9	243	93.8	1	259	259	100	100	1	250	250	7.69e-172	473	1218
1338	AT1G15220.1	AL1G27310.t1	0.0152968	0.129174	0.118421	NG	96.9	155	160	5	0	0	158	98.8	1	160	160	100	100	1	160	160	1.17e-108	306	783
1339	AT1G15230.1	AL1G27320.t1	0.0747319	0.345735	0.216154	NG	84	131	156	25	0	0	144	92.3	1	156	156	100	100	1	156	156	2.83e-89	256	655
1340	AT1G15240.2	AL1G27330.t1	0.0330922	0.128885	0.256757	NG	91.7	936	1021	84	1	1	966	94.6	1	1021	1021	100	100	1	1020	1020	0	1795	4649
1341	AT1G15250.1	AL1G27340.t1	0.00462528	0.220192	0.0210057	NG	97.9	95	97	1	1	1	96	99	1	96	96	100	100	1	97	97	6.99e-64	187	476
1342	AT1G15260.1	AL1G27350.t1	0.0146618	0.133142	0.110121	NG	96.6	173	179	4	1	2	175	97.8	1	179	179	100	100	1	177	177	4.13e-120	336	862
1343	AT1G15270.1	AL1G27360.t1	NA	0.10503	0	NG	100	65	65	0	0	0	65	100	1	65	65	100	100	1	65	65	1.5e-35	114	284
1344	AT1G15280.1	AL1G27370.t1	0.0636669	0.0945149	0.673617	NG	79.6	473	594	103	7	18	496	83.5	1	585	585	100	100	1	585	585	8.7e-279	771	1992
1345	AT1G15280.2	AL1G27370.t2	0.0635372	0.0944125	0.672974	NG	79.5	473	595	104	7	18	496	83.4	1	586	586	100	100	1	586	586	9.37e-279	771	1992
1346	AT1G15290.1	AL1G27380.t1	0.0414219	0.10901	0.379983	NG	90.6	1463	1614	145	3	6	1518	94.1	1	1609	1609	100	100	1	1613	1613	0	2491	6457
1347	AT1G15320.1	AL1G27410.t1	0.0593495	0.211568	0.280522	NG	93.3	277	297	20	0	0	283	95.3	12	308	308	96.4	96.4	22	318	318	7.85e-194	534	1375
1348	AT1G15330.1	AL1G27420.t1	0.016409	0.211472	0.0775946	NG	96.3	340	353	13	0	0	344	97.5	1	353	353	100	100	49	401	401	4.25e-239	654	1686
1349	AT1G15340.1	AL1G27430.t1	0.0346407	0.173943	0.19915	NG	78.4	305	389	49	3	35	313	80.5	1	385	385	100	100	1	358	358	1.96e-136	393	1010
1350	AT1G15350.1	AL1G27440.t2	0.0257332	0.137871	0.186648	NG	85.2	132	155	22	1	1	134	86.5	1	155	155	100	100	1	154	154	2.28e-92	264	675
1351	AT1G15350.3	AL1G27440.t1	0.028433	0.123779	0.229708	NG	83.5	91	109	17	1	1	93	85.3	1	109	109	100	100	1	108	108	3.83e-60	179	454
1352	AT1G15360.1	AL1G27460.t1	0.0296847	0.122716	0.241897	NG	91.5	183	200	14	3	3	189	94.5	1	200	200	100	100	1	197	197	4e-112	318	814
1353	AT1G15370.1	AL1G27470.t1	NA	0.114291	0	NG	100	148	148	0	0	0	148	100	1	148	148	100	100	1	148	148	1.52e-105	297	760
1354	AT1G15380.1	AL1G27480.t1	0.00990572	0.142581	0.0694745	NG	97.7	171	175	4	0	0	174	99.4	1	175	175	100	100	1	175	175	1.1e-127	355	911
1355	AT1G15385.1	AL1G27490.t1	0.0446362	0.229919	0.194139	NG	90.6	58	64	6	0	0	59	92.2	11	74	74	86.5	86.5	14	77	77	1.39e-31	104	260
1356	AT1G15390.1	AL1G27500.t1	0.0102348	0.115553	0.088572	NG	96.9	253	261	7	1	1	256	98.1	11	270	270	96.3	96.3	1	261	261	8.64e-179	492	1266
1357	AT1G15400.2	AL1G27510.t1	0.00951492	0.150447	0.0632444	NG	96.5	139	144	2	1	3	140	97.2	1	141	141	100	100	1	144	144	5.31e-92	262	670
1358	AT1G15410.1	AL1G27520.t1	0.0179288	0.115987	0.154576	NG	96.1	318	331	13	0	0	324	97.9	1	331	331	100	100	1	331	331	9.34e-234	636	1641
1359	AT1G15415.1	AL1G27530.t1	0.0130898	0.113837	0.114987	NG	96.9	94	97	3	0	0	97	100	1	97	97	100	100	1	97	97	4.75e-60	178	451
1360	AT1G15420.1	AL1G27540.t1	0.0221038	0.18933	0.116747	NG	93.5	261	279	18	0	0	263	94.3	1	279	279	100	100	1	279	279	5.11e-150	420	1080
1361	AT1G15430.1	AL1G27550.t1	0.0269079	0.261944	0.102724	NG	93.7	237	253	13	2	3	245	96.8	8	260	260	97.3	97.3	1	250	250	1.83e-177	488	1255
1362	AT1G15440.1	AL1G27560.t1	0.023714	0.133716	0.177346	NG	93	838	901	58	1	5	867	96.2	1	901	901	100	100	1	896	896	0	1684	4360
1363	AT1G15460.1	AL1G27580.t1	0.0154757	0.143577	0.107787	NG	96.8	662	684	22	0	0	674	98.5	1	684	684	100	100	1	684	684	0	1288	3332
1364	AT1G15470.1	AL1G27590.t1	0.00519042	0.104427	0.0497038	NG	98.8	330	334	4	0	0	331	99.1	1	334	334	100	100	1	334	334	2.85e-250	678	1750
1365	AT1G15480.1	AL1G27600.t1	0.0412191	0.0977674	0.421603	NG	89.6	533	595	62	0	0	557	93.6	1	595	595	100	100	1	595	595	0	988	2553
1366	AT1G15490.1	AL2G41220.t1	0.0999911	0.617353	0.161968	NG	80.3	522	650	111	7	17	573	88.2	1	644	649	99.2	99.2	1	639	640	0	1001	2587
1367	AT1G15500.1	AL2G41200.t1	0.0547089	0.620221	0.0882087	NG	89.9	562	625	57	2	6	584	93.4	1	619	619	100	100	1	625	625	0	1086	2808
1368	AT1G15510.1	AL1G27630.t1	0.0185019	0.0986352	0.187579	NG	95.8	831	867	36	0	0	851	98.2	1	867	867	100	100	1	867	867	0	1688	4372
1369	AT1G15530.1	AL1G27660.t1	0.0190909	0.184535	0.103454	NG	96.1	624	649	23	2	2	636	98	10	657	657	98.6	98.6	5	652	652	0	1236	3197
1370	AT1G15540.1	AL1G27670.t1	0.0357735	0.181685	0.196899	NG	92.2	295	320	25	0	0	307	95.9	1	320	321	99.7	99.7	1	320	323	5.54e-226	616	1588
1371	AT1G15550.1	AL1G27680.t1	0.0236641	0.14941	0.158384	NG	95	341	359	18	0	0	348	96.9	1	359	359	100	100	1	359	359	3.52e-259	703	1814
1372	AT1G15570.1	AL1G27690.t1	0.0207881	0.106346	0.195476	NG	94.9	429	452	21	2	2	437	96.7	1	451	451	100	100	1	451	451	4.13e-300	814	2103
1373	AT1G15580.1	AL1G27700.t1	0.0253158	0.160339	0.157889	NG	93.9	155	165	9	1	1	160	97	1	164	164	100	100	1	165	165	2.95e-111	313	801
1374	AT1G15590.1	AL1G27710.t1	0.0801555	0.178696	0.448558	NG	83.2	144	173	29	0	0	157	90.8	1	173	180	96.1	96.1	1	173	259	8.28e-95	275	704
1375	AT1G15610.1	AL1G27720.t1	0.262101	0.360924	0.726194	NG	58.4	118	202	74	4	10	140	69.3	1	201	244	82.4	82.4	1	193	224	8.03e-70	213	543
1376	AT1G15620.1	AL1G27740.t1	0.12712	0.189043	0.67244	NG	76.7	191	249	54	2	4	206	82.7	1	246	246	100	100	1	248	248	2.03e-117	335	859
1377	AT1G15660.1	AL1G27760.t1	0.0621744	0.0972637	0.639235	NG	82.5	586	710	118	4	6	618	87	1	706	706	100	100	1	708	708	0	991	2563
1378	AT1G15670.1	AL1G27770.t1	0.0381242	0.124859	0.305337	NG	91.9	331	360	29	0	0	346	96.1	1	360	360	100	100	1	360	360	1.27e-257	699	1804
1379	AT1G15680.1	AL1G27780.t1	0.0640276	0.11755	0.544684	NG	86.5	358	414	53	1	3	380	91.8	1	411	411	100	100	2	415	415	1.64e-273	744	1920
1380	AT1G15690.1	AL1G27800.t1	0.00288253	0.172155	0.0167438	NG	99.5	765	769	4	0	0	768	99.9	1	769	771	99.7	99.7	1	769	771	0	1445	3740
1381	AT1G15700.1	AL1G27810.t1	0.0162489	0.154576	0.105119	NG	95.3	369	387	13	2	5	376	97.2	1	387	387	100	100	1	382	382	2.85e-239	655	1689
1382	AT1G15710.1	AL1G27820.t1	0.0117426	0.220261	0.0533122	NG	97.4	340	349	9	0	0	342	98	1	349	359	97.2	97.2	1	349	354	1.05e-252	686	1771
1383	AT1G15720.1	AL1G27830.t1	0.0422411	0.15461	0.27321	NG	83.4	327	392	32	2	33	341	87	1	391	391	100	100	1	360	360	1.3e-226	622	1604
1384	AT1G15730.1	AL1G27840.t1	0.02679	0.142736	0.187689	NG	92.4	415	449	32	1	2	426	94.9	1	449	449	100	100	1	447	447	1.16e-270	739	1909
1385	AT1G15740.1	AL1G27850.t1	0.00991671	0.125819	0.0788175	NG	97.6	565	579	14	0	0	568	98.1	8	586	586	98.8	98.8	1	579	579	5.52e-155	456	1174
1386	AT1G15750.1	AL3G29790.t1	0.275274	NA	NA	NG	62.5	724	1159	381	23	54	870	75.1	1	1132	1132	100	100	1	1132	1132	0	1365	3532
1387	AT1G15757.1	AL1G27870.t1	0.0970973	0.0642397	1.51149	NG	83.3	70	84	14	0	0	74	88.1	1	84	84	100	100	1	84	84	1.22e-47	145	367
1388	AT1G15760.1	AL1G27880.t1	0.0344266	0.111449	0.308902	NG	88.2	180	204	18	2	6	183	89.7	1	203	203	100	100	1	199	199	4.44e-124	348	893
1389	AT1G15780.1	AL1G27930.t1	0.0133678	0.114029	0.117232	NG	91.2	1227	1345	108	5	10	1241	92.3	1	1336	1336	100	100	1	1344	1344	0	1889	4893
1390	AT1G15790.1	AL1G27940.t1	0.0743129	0.188415	0.394411	NG	82.3	149	181	28	1	4	164	90.6	4	180	180	98.3	98.3	3	183	183	4.9e-100	286	731
1391	AT1G15800.1	AL1G27950.t1	0.0344382	0.126867	0.271452	NG	91	192	211	16	1	3	197	93.4	1	208	208	100	100	1	211	211	2.81e-115	327	837
1392	AT1G15810.1	AL1G27960.t1	0.0701521	0.0969897	0.723295	NG	84.5	366	433	52	4	15	381	88	1	418	420	99.5	99.5	1	433	435	6.39e-239	657	1696
1393	AT1G15820.1	AL1G27970.t1	0.0199765	0.13468	0.148326	NG	95.8	248	259	11	0	0	254	98.1	1	259	259	100	100	1	259	259	1.13e-182	501	1290
1394	AT1G15825.1	AL1G27980.t1	0.0329287	0.13274	0.248069	NG	87.4	83	95	12	0	0	85	89.5	33	127	127	74.8	74.8	641	735	735	1.28e-45	156	395
1395	AT1G15860.1	AL1G28020.t1	0.0178222	0.143553	0.124151	NG	96.1	219	228	9	0	0	224	98.2	1	228	228	100	100	1	228	228	1.73e-157	435	1118
1396	AT1G15870.1	AL1G28030.t1	0.0426524	0.162943	0.261763	NG	90.6	173	191	18	0	0	184	96.3	53	243	243	78.6	78.6	1	191	191	3.3e-123	347	891
1397	AT1G15880.1	AL1G28040.t1	0.00834087	0.122866	0.0678856	NG	98.7	221	224	3	0	0	224	100	1	224	224	100	100	1	224	224	3.76e-150	416	1069
1398	AT1G15900.1	AL1G28072.t1	0.0496961	0.0952404	0.521796	NG	90.4	103	114	11	0	0	108	94.7	1	114	114	100	100	1	114	114	8.12e-69	201	512
1399	AT1G15920.1	AL1G28080.t1	0.07552	0.256931	0.293931	NG	82.6	237	287	48	1	2	255	88.9	1	287	287	100	100	1	285	285	8.8e-173	478	1231
1400	AT1G15940.1	AL1G28100.t1	0.061961	0.0681948	0.908589	NG	83.6	847	1013	142	3	24	891	88	1	991	991	100	100	1	1011	1011	0	1135	2937
1401	AT1G15950.1	AL1G28110.t1	0.011019	0.143444	0.0768178	NG	96.2	332	345	11	1	2	334	96.8	1	345	345	100	100	1	343	343	7.82e-244	663	1710
1402	AT1G15970.1	AL1G28130.t1	0.0212957	0.128065	0.166289	NG	92.4	328	355	25	2	2	340	95.8	1	353	353	100	100	1	355	355	7.19e-229	626	1614
1403	AT1G15980.1	AL1G28140.t1	0.0192059	0.134318	0.142989	NG	95.9	441	460	19	0	0	451	98	3	462	462	99.6	99.6	2	461	461	0	891	2302
1404	AT1G16000.1	AL1G28160.t1	0.0152076	0.0348556	0.436302	NG	95.5	84	88	3	1	1	86	97.7	1	87	87	100	100	1	88	88	6.58e-40	126	317
1405	AT1G16010.1	AL1G28170.t1	0.00595438	0.13945	0.0426989	NG	98.4	437	444	6	1	1	440	99.1	1	443	443	100	100	1	444	444	3.42e-302	819	2115
1406	AT1G16020.1	AL1G28180.t1	0.0218018	0.12781	0.17058	NG	93	480	516	23	1	13	489	94.8	1	516	516	100	100	1	503	503	0	924	2387
1407	AT1G16022.1	AL1G28190.t1	0.0967916	0.227279	0.425871	NG	85.3	99	116	14	3	3	104	89.7	1	115	124	92.7	92.7	1	114	129	1.31e-57	174	441
1408	AT1G16030.1	AL6G11730.t1	0.125666	2.85998	0.0439394	NG	82.4	540	655	106	3	9	591	90.2	1	647	647	100	100	1	654	654	0	1048	2711
1409	AT1G16040.1	AL1G28210.t1	0.0996563	0.169637	0.587469	NG	81.2	186	229	41	1	2	205	89.5	1	227	227	100	100	1	229	229	4.57e-137	383	984
1410	AT1G16060.1	AL1G28220.t1	0.0198158	0.179475	0.11041	NG	96.2	333	346	13	0	0	340	98.3	1	346	346	100	100	1	346	346	2.14e-242	659	1701
1411	AT1G16070.1	AL1G28230.t1	0.0244598	0.147207	0.166159	NG	94.7	377	398	21	0	0	387	97.2	1	398	398	100	100	1	398	398	2.84e-271	737	1902
1412	AT1G16080.1	AL1G28240.t1	0.00562863	0.0843276	0.0667472	NG	98.7	310	314	4	0	0	311	99	1	314	314	100	100	1	314	314	3.34e-223	608	1568
1413	AT1G16090.1	AL1G28250.t1	0.386356	0.549345	0.703302	NG	71.1	123	173	28	1	22	130	75.1	69	241	318	54.4	54.4	33	183	281	3.82e-77	237	604
1414	AT1G16120.1	AL1G28270.t1	0.109663	0.505435	0.216967	NG	77.4	542	700	147	8	11	589	84.1	33	727	731	95.1	95.1	688	1381	1387	0	1037	2682
1415	AT1G16150.1	AL1G28280.t1	0.0362739	0.139905	0.259274	NG	91.8	701	764	56	2	7	722	94.5	1	762	762	100	100	1	759	759	0	1400	3623
1416	AT1G16170.1	AL1G28300.t1	0.0190365	0.198042	0.0961237	NG	95.7	89	93	4	0	0	90	96.8	1	93	93	100	100	1	93	93	2.06e-59	176	446
1417	AT1G16180.1	AL1G28310.t1	0.00530944	0.139352	0.0381009	NG	98.8	408	413	5	0	0	409	99	1	413	413	100	100	1	413	413	3.84e-304	821	2121
1418	AT1G16190.1	AL1G28320.t1	0.0250364	0.220158	0.113721	NG	91.1	336	369	29	1	4	344	93.2	1	369	369	100	100	1	365	365	1.52e-232	636	1641
1419	AT1G16210.1	AL1G28330.t1	0.0139902	0.249393	0.0560971	NG	90.9	210	231	21	0	0	210	90.9	1	231	235	98.3	98.3	1	231	234	7.93e-97	282	721
1420	AT1G16220.1	AL1G28340.t1	0.0334387	0.198264	0.168657	NG	92.9	458	493	33	2	2	473	95.9	1	492	492	100	100	1	492	492	0	888	2295
1421	AT1G16230.1	AL1G28350.t1	0.115888	0.171302	0.676515	NG	76.7	148	193	44	1	1	162	83.9	1	192	194	99	99	1	193	231	1.77e-91	266	681
1422	AT1G16240.1	AL1G28360.t1	0.0158596	0.0929911	0.17055	NG	96.6	225	233	8	0	0	230	98.7	1	233	233	100	100	1	233	233	5.5e-152	421	1083
1423	AT1G16250.1	AL1G28370.t1	0.0102797	0.121488	0.0846156	NG	97.9	374	382	8	0	0	378	99	1	382	384	99.5	99.5	34	415	417	1.36e-295	798	2062
1424	AT1G16260.1	AL1G28380.t1	0.116871	0.419175	0.278812	NG	74.5	551	740	166	7	23	605	81.8	1	721	721	100	100	1	736	736	0	1053	2723
1425	AT1G16270.1	AL2G40210.t1	0.151139	0.520905	0.290147	NG	68.2	859	1260	281	17	120	960	76.2	1	1148	1148	100	100	1	1252	1252	0	1423	3684
1426	AT1G16280.1	AL1G28400.t1	0.0162474	0.124056	0.130968	NG	95.5	470	492	18	1	4	477	97	1	492	492	100	100	1	488	488	0	899	2324
1427	AT1G16290.1	AL1G28410.t1	0.0154838	0.103927	0.148987	NG	96.4	405	420	15	0	0	412	98.1	1	420	420	100	100	12	431	431	8.08e-305	837	2161
1428	AT1G16300.1	AL1G28420.t1	0.014846	0.104473	0.142103	NG	95.8	407	425	12	1	6	411	96.7	1	419	421	99.5	99.5	1	425	427	2.23e-288	782	2020
1429	AT1G16310.1	AL1G28430.t1	0.0120681	0.130685	0.0923454	NG	96.8	390	403	9	1	4	394	97.8	31	429	429	93	93	1	403	403	1.54e-282	767	1980
1430	AT1G16320.1	AL1G28440.t1	0.02566	0.132023	0.194359	NG	93.8	258	275	15	2	2	268	97.5	1	274	274	100	100	1	274	274	9.6e-187	513	1320
1431	AT1G16330.1	AL1G28450.t1	0.0356852	0.13848	0.257693	NG	92	598	650	48	3	4	610	93.8	1	649	649	100	100	28	674	674	0	1095	2831
1432	AT1G16340.1	AL1G28460.t1	0.0136492	0.131267	0.10398	NG	96.9	283	292	9	0	0	289	99	1	292	292	100	100	1	292	292	6.15e-208	568	1463
1433	AT1G16350.1	AL1G28470.t1	0.00966291	0.143316	0.0674238	NG	98	493	503	10	0	0	500	99.4	1	503	503	100	100	1	503	503	0	964	2491
1434	AT1G16360.2	AL1G28480.t1	0.0222599	0.22392	0.09941	NG	95.4	335	351	16	0	0	341	97.2	1	351	351	100	100	1	351	351	4.89e-246	669	1726
1435	AT1G16370.1	AL1G28490.t1	0.0204751	0.164967	0.124116	NG	92.9	485	522	22	3	15	495	94.8	1	522	522	100	100	1	507	507	0	932	2410
1436	AT1G16380.1	AL2G40010.t1	0.15991	0.946472	0.168954	NG	72.6	572	788	210	5	6	668	84.8	1	786	786	100	100	1	784	784	0	1114	2882
1437	AT1G16390.1	AL1G28510.t1	0.0251927	0.150388	0.167518	NG	95	493	519	26	0	0	505	97.3	1	519	519	100	100	1	519	519	0	986	2549
1438	AT1G16410.1	AL1G28520.t1	0.0486568	0.217416	0.223795	NG	88.9	479	539	56	1	4	502	93.1	1	539	539	100	100	4	538	538	0	975	2521
1439	AT1G16420.1	AL1G28550.t1	0.0731718	0.132083	0.553986	NG	85.3	325	381	53	2	3	346	90.8	1	380	382	99.5	99.5	1	379	380	2.85e-228	627	1616
1440	AT1G16430.1	AL1G28560.t1	0.0176187	0.218684	0.0805667	NG	96	144	150	6	0	0	147	98	1	150	151	99.3	99.3	1	150	152	2.42e-81	236	602
1441	AT1G16440.1	AL1G28570.t1	0.0100626	0.169821	0.0592538	NG	97.8	408	417	8	1	1	411	98.6	84	500	500	83.4	83.4	16	431	431	5.18e-304	825	2132
1442	AT1G16445.1	AL1G28580.t1	0.0267039	0.0791435	0.337411	NG	94.2	259	275	16	0	0	270	98.2	1	275	275	100	100	1	275	275	3.24e-190	521	1343
1443	AT1G16460.1	AL1G28600.t1	0.0378812	0.0753835	0.502513	NG	91	292	321	27	1	2	301	93.8	1	319	319	100	100	1	321	321	4.47e-215	588	1516
1444	AT1G16470.1	AL1G28620.t1	0.00186906	0.0810065	0.0230729	NG	99.6	235	236	1	0	0	235	99.6	1	236	236	100	100	1	236	236	6.54e-166	457	1175
1445	AT1G16480.1	AL1G28630.t1	0.0195302	0.116069	0.168264	NG	95.6	897	938	41	0	0	921	98.2	1	938	938	100	100	1	938	938	0	1801	4665
1446	AT1G16490.1	AL1G28640.t1	0.0271437	0.113944	0.23822	NG	84.5	257	304	18	3	29	265	87.2	1	275	275	100	100	1	304	304	5.39e-173	479	1233
1447	AT1G16500.1	AL1G28660.t1	0.0386187	0.142579	0.270858	NG	87.4	229	262	31	2	2	236	90.1	1	260	260	100	100	1	262	262	4.03e-138	389	998
1448	AT1G16510.1	AL1G28670.t1	0.034117	0.229701	0.148528	NG	92.6	137	148	11	0	0	143	96.6	1	148	148	100	100	1	148	148	4.35e-96	273	698
1449	AT1G16515.2	AL1G28680.t1	0.118442	0.154399	0.767116	NG	76.2	64	84	16	2	4	72	85.7	1	84	88	95.5	95.5	1	80	84	6.83e-37	119	297
1450	AT1G16520.1	AL1G28690.t1	0.0214209	0.108806	0.196873	NG	95.1	310	326	13	2	3	313	96	1	326	326	100	100	1	323	323	2.42e-203	559	1440
1451	AT1G16530.1	AL1G28700.t1	0.0363936	0.221777	0.1641	NG	81.8	153	187	12	2	22	156	83.4	1	166	166	100	100	1	186	186	7.11e-106	300	768
1452	AT1G16540.3	AL1G28710.t1	0.0226508	0.0958228	0.236382	NG	92.2	730	792	39	1	23	751	94.8	52	843	843	94	94	1	769	769	0	1468	3801
1453	AT1G16560.1	AL1G28730.t1	0.0159137	0.118769	0.133989	NG	96.8	332	343	11	0	0	336	98	1	343	343	100	100	1	343	343	8.29e-259	701	1808
1454	AT1G16570.2	AL1G28740.t1	0.0132149	0.0740398	0.178484	NG	90.9	452	497	14	1	31	457	92	1	497	497	100	100	1	466	466	0	902	2330
1455	AT1G16590.1	AL1G28750.t1	0.0522636	0.073127	0.714696	NG	88	190	216	23	2	3	200	92.6	1	216	216	100	100	1	213	213	1.25e-132	371	952
1456	AT1G16610.4	AL1G28770.t1	0.0267274	0.166477	0.160547	NG	83.7	195	233	31	3	7	200	85.8	1	227	382	59.4	59.4	1	232	412	2.17e-80	252	643
1457	AT1G16610.6	AL1G28770.t2	0.0262552	0.162735	0.161337	NG	83	186	224	31	3	7	191	85.3	1	218	389	56	56	1	223	419	6.06e-74	236	601
1458	AT1G16630.1	AL1G28790.t1	0.0641381	0.147544	0.434706	NG	77.1	671	870	151	7	48	705	81	1	846	846	100	100	1	846	846	0	1067	2759
1459	AT1G16640.1	AL1G28810.t1	0.106206	0.127691	0.831742	NG	84.6	104	123	19	0	0	114	92.7	1	123	135	91.1	91.1	1	123	134	2.14e-76	222	566
1460	AT1G16650.3	AL1G28820.t1	0.0289119	0.13957	0.20715	NG	92.1	488	530	33	2	9	504	95.1	1	530	530	100	100	1	521	521	0	936	2420
1461	AT1G16670.1	AL1G28830.t1	0.00782466	0.159971	0.0489131	NG	98	384	392	7	1	1	388	99	1	391	391	100	100	1	392	392	3.37e-278	754	1946
1462	AT1G16680.1	AL2G39490.t1	0.0919177	0.733098	0.125383	NG	82	461	562	94	4	7	499	88.8	1	555	555	100	100	1	562	562	0	900	2326
1463	AT1G16690.1	AL1G28850.t1	0.025718	0.117354	0.219149	NG	94.3	417	442	23	1	2	425	96.2	1	440	440	100	100	1	442	442	3.28e-301	816	2108
1464	AT1G16700.1	AL1G28860.t1	NA	0.0823198	0	NG	100	223	223	0	0	0	223	100	1	223	223	100	100	1	223	223	6.63e-139	387	995
1465	AT1G16705.1	AL1G28870.t1	0.0530746	0.210694	0.251904	NG	73.4	94	128	9	2	25	95	74.2	1	127	129	98.4	98.4	1	104	106	7.83e-51	156	395
1466	AT1G16710.1	AL2G39460.t1	0.125065	0.604217	0.206987	NG	72.6	1264	1741	408	11	69	1399	80.4	1	1707	1707	100	100	1	1706	1706	0	2356	6105
1467	AT1G16720.2	AL1G28890.t1	0.00891127	0.156326	0.0570044	NG	91.5	579	633	20	2	34	585	92.4	1	632	632	100	100	1	600	600	0	1070	2767
1468	AT1G16730.1	AL1G28900.t1	0.0479798	0.133184	0.360251	NG	87.5	182	208	21	1	5	192	92.3	1	203	203	100	100	1	208	208	1.57e-103	296	759
1469	AT1G16740.1	AL1G28910.t1	0.00340105	0.190274	0.0178745	NG	99.2	126	127	1	0	0	127	100	1	127	127	100	100	1	127	127	1.5e-86	247	631
1470	AT1G16750.1	AL1G28920.t1	0.0242702	0.149145	0.162728	NG	94.5	501	530	28	1	1	514	97	1	530	530	100	100	1	529	529	0	962	2487
1471	AT1G16760.2	AL2G39380.t1	0.14093	0.909499	0.154953	NG	76.8	589	767	157	9	21	659	85.9	1	757	763	99.2	99.2	1	756	764	0	1082	2799
1472	AT1G16770.1	AL1G28940.t1	0.0278441	0.124672	0.223339	NG	93.8	305	325	20	0	0	316	97.2	1	325	325	100	100	1	325	325	1.65e-224	612	1579
1473	AT1G16780.1	AL2G39350.t1	0.0375044	0.439006	0.0854304	NG	92.7	744	803	59	0	0	777	96.8	1	803	803	100	100	1	803	803	0	1433	3710
1474	AT1G16790.1	AL1G28960.t1	0.0188116	0.119024	0.15805	NG	95.9	139	145	6	0	0	142	97.9	1	145	145	100	100	1	145	145	1.93e-93	266	680
1475	AT1G16800.1	AL1G28970.t1	0.0203485	0.087252	0.233215	NG	89.8	1998	2226	115	3	113	2041	91.7	1	2114	2115	100	100	1	2225	2229	0	3779	9801
1476	AT1G16810.1	AL1G28980.t1	0.0312538	0.0644984	0.484568	NG	93.8	136	145	9	0	0	139	95.9	1	145	145	100	100	1	145	145	2.83e-86	248	633
1477	AT1G16825.1	AL1G28990.t1	0.0180737	0.0883303	0.204614	NG	96.1	147	153	6	0	0	150	98	4	156	156	98.1	98.1	1	153	153	6.12e-97	276	705
1478	AT1G16830.1	AL1G29000.t1	0.0377191	0.145222	0.259734	NG	80.3	494	615	112	2	9	515	83.7	1	609	609	100	100	1	612	612	3.18e-294	813	2099
1479	AT1G16840.1	AL1G29010.t1	0.031585	0.118877	0.265696	NG	93.2	151	162	11	0	0	153	94.4	1	162	162	100	100	3	164	164	7.45e-102	289	739
1480	AT1G16850.1	AL1G29020.t1	0.0457055	0.174615	0.26175	NG	87.6	134	153	14	1	5	139	90.8	1	153	153	100	100	1	148	148	5.27e-87	250	639
1481	AT1G16860.1	AL1G29030.t1	0.00661799	0.120401	0.0549664	NG	95.8	455	475	20	0	0	458	96.4	1	475	475	100	100	1	475	475	0	880	2274
1482	AT1G16870.1	AL1G29040.t1	0.0211772	0.0976673	0.21683	NG	93.8	451	481	30	0	0	458	95.2	1	481	481	100	100	1	481	481	3.67e-305	857	2215
1483	AT1G16880.1	AL1G29050.t2	0.0189766	0.120984	0.156852	NG	95.9	281	293	10	1	2	287	98	1	291	291	100	100	1	293	293	3.57e-191	525	1353
1484	AT1G16890.2	AL1G29060.t1	NA	0.0793536	0	NG	100	154	154	0	0	0	154	100	1	154	154	100	100	1	154	154	1.29e-109	308	788
1485	AT1G16900.1	AL1G29070.t1	0.0175086	0.120142	0.145732	NG	96.3	550	571	21	0	0	563	98.6	1	571	571	100	100	1	571	571	0	1105	2859
1486	AT1G16905.1	AL1G29080.t1	0.0333913	0.187615	0.177978	NG	92.7	394	425	30	1	1	414	97.4	1	424	424	100	100	1	425	425	1.41e-289	785	2028
1487	AT1G16916.1	AL1G29090.t1	0.0434679	0.242039	0.179591	NG	85.7	60	70	6	2	4	62	88.6	1	66	66	100	100	1	70	70	1.79e-35	114	284
1488	AT1G16920.1	AL1G29110.t1	0.0020253	0.208883	0.00969584	NG	99.5	216	217	1	0	0	217	100	1	217	217	100	100	1	217	217	1.19e-154	427	1097
1489	AT1G16930.1	AL1G29120.t1	0.0269642	0.12758	0.211352	NG	93.2	422	453	28	1	3	433	95.6	1	450	450	100	100	1	453	453	1.6e-305	843	2178
1490	AT1G16950.1	AL1G29130.t1	0.019464	0.156456	0.124405	NG	95.7	90	94	4	0	0	92	97.9	1	94	94	100	100	1	94	94	3.15e-59	176	445
1491	AT1G16960.1	AL1G29140.t1	0.0152703	0.15762	0.0968803	NG	96.5	111	115	4	0	0	112	97.4	1	115	115	100	100	1	115	115	2.15e-78	226	575
1492	AT1G17020.1	AL1G29180.t1	0.0193627	0.13867	0.139632	NG	95.5	343	359	16	0	0	352	98.1	1	359	359	100	100	1	359	359	4.41e-253	687	1774
1493	AT1G17030.1	AL1G29190.t1	0.0192605	0.102025	0.188781	NG	95.4	480	503	22	1	1	493	98	1	503	503	100	100	1	502	502	0	1033	2670
1494	AT1G17050.1	AL7G51010.t1	0.00901753	0.129471	0.0696488	NG	97.9	330	337	7	0	0	335	99.4	82	418	418	80.6	80.6	1	337	337	7.13e-230	630	1626
1495	AT1G17060.1	AL7G51020.t1	0.043521	0.212692	0.20462	NG	98.2	278	283	5	0	0	280	98.9	3	285	314	90.1	90.1	2	284	476	2.28e-202	562	1448
1496	AT1G17070.1	AL1G29240.t1	0.0269515	0.129903	0.207474	NG	93.1	791	850	59	0	0	812	95.5	1	850	850	100	100	1	850	850	0	1518	3931
1497	AT1G17080.1	AL1G29250.t1	0.00287533	0.124234	0.0231444	NG	98.1	154	157	1	1	2	154	98.1	1	155	155	100	100	1	157	157	5.39e-112	314	804
1498	AT1G17090.1	AL1G29260.t1	0.0328242	0.102812	0.319265	NG	88.4	84	95	7	2	4	86	90.5	1	94	94	100	100	1	92	92	1.47e-50	154	388
1499	AT1G17100.1	AL1G29300.t1	0.0171014	0.155573	0.109925	NG	96.1	224	233	9	0	0	227	97.4	1	233	233	100	100	1	233	233	2.11e-165	455	1171
1500	AT1G17110.1	AL1G29310.t1	0.0252019	0.107614	0.234187	NG	91.2	854	936	66	5	16	872	93.2	1	925	925	100	100	1	931	931	0	1612	4174
1501	AT1G17120.1	AL1G29320.t1	0.0116654	0.154293	0.0756051	NG	98	544	555	11	0	0	548	98.7	6	560	591	93.9	93.9	1	555	556	0	1044	2699
1502	AT1G17130.1	AL1G29340.t1	0.0289098	0.117637	0.245755	NG	92.5	307	332	23	1	2	312	94	1	332	332	100	100	1	330	330	3.41e-204	561	1447
1503	AT1G17140.1	AL1G29350.t1	0.0279165	0.123006	0.226953	NG	87.5	302	345	43	0	0	310	89.9	1	345	345	100	100	1	345	345	2.47e-169	474	1221
1504	AT1G17145.1	AL1G29360.t1	0.0269058	0.165739	0.162338	NG	91.7	308	336	27	1	1	316	94	1	336	336	100	100	1	335	335	1.51e-207	570	1470
1505	AT1G17147.1	AL1G29370.t1	0.0269514	0.165448	0.162899	NG	94.9	94	99	5	0	0	96	97	1	99	99	100	100	1	99	99	8.75e-66	192	489
1506	AT1G17150.1	AL1G29380.t1	0.0750132	0.189936	0.39494	NG	85.7	288	336	48	0	0	311	92.6	68	403	403	83.4	83.4	1	336	336	5.01e-219	602	1553
1507	AT1G17160.1	AL1G29390.t1	0.0362712	0.191783	0.189126	NG	91.7	353	385	22	5	10	364	94.5	1	380	380	100	100	4	383	383	2.61e-238	652	1682
1508	AT1G17170.1	AL1G29400.t1	0.0297017	0.196376	0.151249	NG	93.2	204	219	15	0	0	213	97.3	1	219	219	100	100	1	219	219	1.55e-151	419	1077
1509	AT1G17180.1	AL1G29410.t1	0.0299315	0.176518	0.169566	NG	95.3	184	193	9	0	0	188	97.4	1	193	222	86.9	86.9	1	193	198	1.51e-138	385	990
1510	AT1G17190.1	AL1G29420.t1	0.0293408	0.128276	0.228733	NG	93.5	202	216	14	0	0	209	96.8	4	219	221	97.7	97.7	3	218	220	8.99e-154	425	1092
1511	AT1G17200.1	AL1G29440.t1	0.00877551	0.143106	0.0613219	NG	98	201	205	4	0	0	202	98.5	1	205	205	100	100	1	205	205	5.88e-140	389	998
1512	AT1G17210.1	AL1G29450.t1	0.00776001	0.080022	0.0969734	NG	98.3	943	959	16	0	0	946	98.6	1	959	959	100	100	1	959	959	0	1778	4606
1513	AT1G17220.1	AL1G29460.t1	0.00881302	0.0717329	0.122859	NG	96.8	995	1028	32	1	1	1006	97.9	1	1027	1027	100	100	1	1028	1028	0	1791	4638
1514	AT1G17230.1	AL1G29470.t1	0.019758	0.104384	0.189282	NG	96.2	1059	1101	42	0	0	1071	97.3	1	1101	1102	99.9	99.9	1	1101	1108	1.35e-288	837	2161
1515	AT1G17235.1	AL1G29480.t1	0.081383	0.218059	0.373216	NG	65.3	77	118	14	3	27	84	71.2	1	118	120	98.3	98.3	1	91	93	2.07e-41	132	331
1516	AT1G17240.2	AL1G29490.t1	0.0520384	0.163334	0.318602	NG	85.2	626	735	106	1	3	652	88.7	1	732	735	99.6	99.6	42	776	781	4.81e-268	758	1957
1517	AT1G17270.1	AL1G29520.t1	0.025737	0.135322	0.19019	NG	92.2	531	576	33	2	12	546	94.8	1	564	565	99.8	99.8	1	576	584	0	1041	2692
1518	AT1G17280.1	AL1G29530.t1	0.0129221	0.162124	0.0797047	NG	97.5	232	238	6	0	0	233	97.9	1	238	238	100	100	1	238	238	8.9e-165	454	1168
1519	AT1G17285.1	AL1G29540.t1	0.0372637	0.0500718	0.744205	NG	91.7	88	96	7	1	1	88	91.7	1	96	96	100	100	1	95	95	1.82e-52	159	401
1520	AT1G17300.2	AL1G29560.t1	0.0879871	0.204754	0.429722	NG	60	90	150	21	3	39	99	66	1	147	147	100	100	1	114	114	1.39e-43	139	350
1521	AT1G17310.1	AL1G29570.t1	0.0236197	0.0876925	0.269346	NG	93.7	192	205	11	2	2	195	95.1	15	218	218	93.6	93.6	1	204	204	1.63e-131	368	944
1522	AT1G17330.1	AL1G29580.t1	0.019524	0.109593	0.178149	NG	95.5	213	223	10	0	0	221	99.1	1	223	223	100	100	1	223	223	6.03e-151	418	1074
1523	AT1G17340.1	AL1G29590.t1	0.0235427	0.109115	0.21576	NG	94.9	746	786	40	0	0	771	98.1	1	786	786	100	100	1	786	786	0	1501	3887
1524	AT1G17345.1	AL1G29600.t1	0.0441288	0.218586	0.201883	NG	86.8	118	136	14	2	4	120	88.2	1	132	132	100	100	1	136	136	2.88e-76	222	565
1525	AT1G17350.1	AL1G29610.t1	0.00767006	0.132144	0.0580431	NG	98.2	224	228	4	0	0	228	100	1	228	228	100	100	1	228	228	2.7e-170	467	1202
1526	AT1G17360.1	AL1G29630.t1	0.0469126	0.142923	0.328237	NG	85.2	913	1072	144	5	15	947	88.3	1	1062	1062	100	100	1	1067	1067	0	1572	4071
1527	AT1G17370.1	AL1G29640.t1	0.00933965	0.0885481	0.105475	NG	98.1	412	420	8	0	0	415	98.8	1	420	420	100	100	1	420	420	8.89e-293	793	2048
1528	AT1G17380.1	AL1G29650.t1	0.0596566	0.138201	0.431666	NG	84.9	237	279	33	3	9	244	87.5	3	275	275	99.3	99.3	2	277	277	2.02e-150	421	1082
1529	AT1G17400.1	AL1G29660.t1	0.0143686	0.138101	0.104044	NG	95.3	283	297	13	1	1	288	97	1	296	296	100	100	1	297	297	5.89e-190	523	1346
1530	AT1G17410.1	AL1G29670.t1	0.0466898	0.152406	0.306351	NG	90.1	164	182	18	0	0	172	94.5	1	182	182	100	100	1	182	182	2.95e-115	324	831
1531	AT1G17420.1	AL2G32210.t1	0.0953883	1.00383	0.0950246	NG	83.4	776	930	136	8	18	843	90.6	1	920	920	100	100	1	922	922	0	1540	3986
1532	AT1G17430.1	AL1G29690.t1	0.019137	0.213652	0.0895711	NG	95.5	319	334	14	1	1	324	97	1	333	333	100	100	1	334	334	4.42e-231	630	1624
1533	AT1G17440.1	AL1G29720.t1	0.0222924	0.138364	0.161114	NG	86.9	599	689	71	6	19	612	88.8	1	684	684	100	100	1	675	675	0	894	2311
1534	AT1G17450.2	AL1G29730.t1	0.0220326	0.0973377	0.226352	NG	93.4	1737	1859	100	6	22	1774	95.4	1	1845	1845	100	100	1	1851	1851	0	3328	8628
1535	AT1G17455.1	AL1G29740.t1	NA	0.0426256	0	NG	100	115	115	0	0	0	115	100	1	115	115	100	100	1	115	115	8.42e-76	219	558
1536	AT1G17460.2	AL1G29750.t1	0.0705818	0.111057	0.635544	NG	80.6	512	635	93	4	30	545	85.8	1	625	625	100	100	1	615	615	0	942	2434
1537	AT1G17470.1	AL1G29760.t1	NA	0.0952863	0	NG	100	400	400	0	0	0	400	100	1	400	400	100	100	1	400	400	1.31e-293	793	2049
1538	AT1G17480.1	AL1G29770.t2	0.0208825	0.130355	0.160196	NG	94.2	355	377	17	1	5	362	96	1	372	372	100	100	1	377	377	1.66e-242	662	1708
1539	AT1G17490.1	AL1G29780.t1	0.0194152	0.0760665	0.255239	NG	93.8	75	80	3	1	2	76	95	1	78	78	100	100	1	80	80	5.53e-44	136	342
1540	AT1G17510.1	AL1G29800.t1	0.0595247	0.0584829	1.01781	NG	84.6	104	123	14	1	5	111	90.2	1	123	123	100	100	1	118	118	7.93e-61	182	461
1541	AT1G17520.2	AL1G29820.t2	0.0363725	0.115437	0.315084	NG	93	278	299	20	1	1	286	95.7	1	298	298	100	100	1	299	299	3.8e-187	516	1328
1542	AT1G17520.3	AL1G29820.t1	0.0371598	0.117802	0.315443	NG	92.8	272	293	20	1	1	280	95.6	1	292	292	100	100	1	293	293	6.29e-183	504	1299
1543	AT1G17520.4	AL1G29820.t3	0.037307	0.118061	0.315998	NG	92.8	271	292	20	1	1	279	95.5	1	291	291	100	100	1	292	292	2.37e-182	503	1295
1544	AT1G17530.1	AL1G29830.t1	0.0218578	0.154525	0.141451	NG	95.2	179	188	9	0	0	184	97.9	1	188	188	100	100	1	188	188	2.73e-123	345	885
1545	AT1G17540.1	AL1G29840.t1	0.0274403	0.0914828	0.299951	NG	90.1	662	735	66	2	7	676	92	1	729	729	100	100	1	734	734	0	1210	3130
1546	AT1G17550.1	AL1G29860.t1	0.0136918	0.119256	0.11481	NG	96.5	497	515	15	1	3	504	97.9	1	512	512	100	100	1	515	515	0	967	2500
1547	AT1G17560.1	AL1G29870.t1	0.04422	0.13808	0.320249	NG	85.8	145	169	11	2	13	150	88.8	29	197	197	85.8	85.8	2	157	157	9.39e-92	265	676
1548	AT1G17590.1	AL1G29910.t1	0.0815294	0.121676	0.670051	NG	81.8	275	336	50	4	11	292	86.9	1	329	329	100	100	1	332	332	3.74e-180	501	1289
1549	AT1G17600.1	AL1G29920.t1	0.0771227	0.192273	0.40111	NG	83.9	832	992	100	5	60	869	87.6	1	992	1050	94.5	94.5	1	932	1054	0	1616	4184
1550	AT1G17610.1	AL1G29930.t1	0.0440731	0.152672	0.288679	NG	85	356	419	36	2	27	371	88.5	1	419	421	99.5	99.5	1	392	394	1.87e-242	665	1715
1551	AT1G17615.1	AL1G29940.t1	0.0395574	0.166408	0.237714	NG	91.9	351	382	29	2	2	366	95.8	1	381	381	100	100	1	381	381	1.99e-251	685	1768
1552	AT1G17620.1	AL1G29950.t1	0.0400682	0.18373	0.218082	NG	90.2	240	266	25	1	1	245	92.1	1	265	265	100	100	1	266	266	7.23e-141	396	1017
1553	AT1G17630.1	AL1G29960.t1	0.047314	0.137994	0.34287	NG	90.3	661	732	71	0	0	693	94.7	1	732	732	100	100	1	732	732	0	1316	3407
1554	AT1G17640.1	AL1G29970.t1	0.0267469	0.0986913	0.271015	NG	92.7	343	370	20	1	7	351	94.9	1	370	370	100	100	1	363	363	3.1e-183	511	1317
1555	AT1G17650.1	AL1G29980.t1	0.0130964	0.102836	0.127352	NG	97.1	331	341	9	1	1	336	98.5	16	355	359	94.7	94.7	1	341	342	1.76e-232	635	1637
1556	AT1G17665.1	AL1G29990.t1	0.0275196	0.112362	0.24492	NG	91.4	296	324	22	4	6	305	94.1	17	339	339	95.3	95.3	1	319	319	1.8e-182	506	1304
1557	AT1G17680.1	AL1G30030.t1	0.0183983	0.0807042	0.227972	NG	93.4	846	906	41	7	19	867	95.7	1	897	897	100	100	1	896	896	0	1590	4117
1558	AT1G17690.1	AL1G30040.t1	0.0358776	0.115141	0.311597	NG	90.2	684	758	62	4	12	707	93.3	1	755	755	100	100	1	749	749	0	1275	3300
1559	AT1G17700.1	AL1G30050.t1	0.0301725	0.166101	0.181651	NG	93.9	170	181	11	0	0	176	97.2	1	181	181	100	100	1	181	181	6.45e-114	321	822
1560	AT1G17710.1	AL1G30060.t1	0.0253357	0.120867	0.209615	NG	93.3	266	285	14	1	5	272	95.4	1	280	280	100	100	1	285	285	1.86e-195	535	1379
1561	AT1G17720.1	AL1G30070.t1	0.00689984	0.108976	0.0633153	NG	96.5	490	508	11	3	7	496	97.6	1	502	502	100	100	1	507	507	0	969	2505
1562	AT1G17745.2	AL1G30090.t1	0.0138048	0.176838	0.0780648	NG	89.1	581	652	20	4	51	593	91	1	652	652	100	100	1	601	601	0	1067	2759
1563	AT1G17750.1	AL1G30100.t1	0.0401601	0.0981938	0.408989	NG	92.9	1012	1089	73	3	4	1023	93.9	1	1089	1089	100	100	1	1085	1085	6.97e-276	803	2073
1564	AT1G17760.1	AL1G30120.t1	0.0157938	0.0890048	0.177449	NG	96.5	709	735	26	0	0	721	98.1	1	735	735	100	100	1	735	735	0	1396	3613
1565	AT1G17770.1	AL1G30130.t1	0.0977211	0.203137	0.48106	NG	78.5	556	708	128	8	24	598	84.5	1	694	694	100	100	110	807	807	0	1092	2825
1566	AT1G17780.2	AL1G30140.t1	0.0659975	0.119735	0.551195	NG	82.6	228	276	36	4	12	246	89.1	1	264	264	100	100	1	276	276	4.01e-147	412	1059
1567	AT1G17790.1	AL1G30150.t1	0.032642	0.0861507	0.378894	NG	90.2	443	491	37	3	11	458	93.3	1	488	488	100	100	1	483	483	8.33e-269	738	1905
1568	AT1G17800.1	AL1G30160.t1	0.0287022	0.118444	0.242327	NG	93.6	132	141	9	0	0	136	96.5	1	141	141	100	100	1	141	141	4.45e-97	275	703
1569	AT1G17810.1	AL1G30170.t1	0.0135686	0.115176	0.117808	NG	97	260	268	8	0	0	266	99.3	1	268	268	100	100	1	268	268	7.36e-188	515	1326
1570	AT1G17820.1	AL2G32970.t1	0.178102	0.707745	0.251647	NG	62.7	520	829	232	19	77	616	74.3	1	802	804	99.8	99.8	1	779	780	0	911	2355
1571	AT1G17830.1	AL1G30190.t1	0.037096	0.133465	0.277946	NG	91.9	306	333	27	0	0	316	94.9	6	338	338	98.5	98.5	1	333	333	1.22e-229	626	1615
1572	AT1G17840.1	AL1G30200.t1	0.00249263	0.127941	0.0194827	NG	99.4	700	704	4	0	0	702	99.7	1	704	704	100	100	1	704	704	0	1368	3541
1573	AT1G17850.2	AL1G30210.t1	0.0495916	0.157673	0.314521	NG	89.6	403	450	45	2	2	422	93.8	1	449	449	100	100	1	449	449	4.04e-305	829	2142
1574	AT1G17860.1	AL1G30220.t1	0.0563869	0.133132	0.423541	NG	89.8	177	197	20	0	0	182	92.4	1	197	197	100	100	1	197	197	2.22e-131	366	940
1575	AT1G17870.1	AL1G30230.t1	0.0227901	0.191768	0.118842	NG	96	551	574	23	0	0	560	97.6	1	574	574	100	100	1	574	574	0	1022	2642
1576	AT1G17880.1	AL1G30240.t2	0.0159278	0.14858	0.1072	NG	96.4	160	166	5	1	1	161	97	1	166	166	100	100	1	165	165	2.23e-102	290	743
1577	AT1G17890.2	AL1G30250.t1	0.00952083	0.214143	0.0444602	NG	98.8	317	321	4	0	0	319	99.4	1	321	321	100	100	1	321	321	3.15e-236	642	1655
1578	AT1G17910.1	AL1G30260.t1	0.0838847	0.157065	0.534077	NG	83.9	647	771	117	4	7	688	89.2	1	765	765	100	100	1	770	770	0	1206	3119
1579	AT1G17930.1	AL1G30280.t1	0.00360378	0.145086	0.0248389	NG	97.5	467	479	11	1	1	469	97.9	1	479	479	100	100	1	478	478	0	941	2431
1580	AT1G17940.1	AL1G30290.t1	0.00431887	0.139308	0.0310024	NG	99.3	401	404	3	0	0	402	99.5	1	404	406	99.5	99.5	1	404	405	2.02e-293	793	2049
1581	AT1G17950.1	AL1G30310.t1	0.0192515	0.120056	0.160354	NG	94.4	237	251	11	2	3	242	96.4	1	250	250	100	100	1	249	249	2.04e-178	489	1260
1582	AT1G17970.1	AL1G30330.t1	0.044955	0.176898	0.25413	NG	80.4	303	377	36	8	38	313	83	1	369	369	100	100	1	347	347	5.3e-194	538	1386
1583	AT1G17980.1	AL1G30340.t1	0.0303909	0.0857241	0.35452	NG	93.3	669	717	45	2	3	685	95.5	1	714	714	100	100	1	717	717	0	1324	3427
1584	AT1G18000.1	AL1G30350.t1	0.0202592	0.194834	0.103982	NG	95.2	439	461	21	1	1	444	96.3	1	460	460	100	100	1	461	461	0	880	2274
1585	AT1G18030.1	AL1G30380.t1	0.0181605	0.0744942	0.243785	NG	92.7	328	354	13	2	13	333	94.1	1	352	352	100	100	1	343	343	4.42e-229	626	1614
1586	AT1G18040.1	AL1G30390.t1	0.00667189	0.086359	0.0772577	NG	98.5	384	390	6	0	0	387	99.2	3	392	392	99.5	99.5	5	394	394	2.9e-282	764	1973
1587	AT1G18060.1	AL1G30420.t1	0.0208126	0.15207	0.136861	NG	95.1	215	226	10	1	1	218	96.5	1	226	227	99.6	99.6	1	225	227	2.01e-151	419	1078
1588	AT1G18070.3	AL1G30430.t1	0.0158668	0.130842	0.121267	NG	91.4	498	545	35	2	12	508	93.2	1	544	544	100	100	1	534	534	0	947	2448
1589	AT1G18080.1	AL1G30460.t1	0.00402181	0.141218	0.0284794	NG	99.4	326	328	2	0	0	327	99.7	1	328	328	100	100	1	328	328	5.29e-195	538	1386
1590	AT1G18090.1	AL1G30470.t1	0.0414742	0.127381	0.325591	NG	91.2	527	578	51	0	0	548	94.8	1	578	578	100	100	1	578	578	0	1018	2632
1591	AT1G18100.1	AL1G30480.t1	0.00510343	0.129889	0.0392906	NG	98.9	172	174	2	0	0	174	100	1	174	174	100	100	1	174	174	5.05e-128	356	913
1592	AT1G18140.1	AL1G30510.t1	0.0217519	0.144878	0.15014	NG	95.5	556	582	26	0	0	569	97.8	1	582	582	100	100	1	582	582	0	1148	2970
1593	AT1G18150.1	AL2G33460.t1	0.0853125	0.618969	0.13783	NG	80.4	484	602	87	9	31	518	86	1	590	590	100	100	1	583	583	0	897	2317
1594	AT1G18170.1	AL1G30540.t1	0.0206248	0.135693	0.151996	NG	93.6	233	249	13	2	3	234	94	1	248	248	100	100	1	247	247	6.97e-137	384	987
1595	AT1G18180.1	AL1G30550.t1	0.0162377	0.0968076	0.167732	NG	94.1	288	306	11	1	7	294	96.1	1	306	306	100	100	1	299	299	9.21e-213	581	1497
1596	AT1G18190.1	AL1G30560.t1	0.0318946	0.0928941	0.343343	NG	92.5	619	669	47	1	3	641	95.8	1	669	669	100	100	1	666	666	0	1044	2699
1597	AT1G18197.1	AL1G30590.t1	0.198758	0.34221	0.580806	NG	62.9	66	105	36	3	3	82	78.1	1	105	107	98.1	98.1	1	102	167	3.25e-35	118	295
1598	AT1G18200.1	AL1G30570.t1	0.0865366	0.207666	0.416711	NG	91.3	200	219	13	1	6	206	94.1	1	213	230	92.6	92.6	1	219	223	4.35e-139	388	997
1599	AT1G18210.1	AL1G30580.t1	0.00776225	0.118596	0.0654511	NG	98.2	164	167	3	0	0	167	100	1	167	171	97.7	97.7	1	167	170	7.19e-115	322	826
1600	AT1G18250.1	AL1G30620.t1	0.00910979	0.129312	0.0704482	NG	98	239	244	5	0	0	240	98.4	1	244	244	100	100	1	244	244	7.15e-183	500	1288
1601	AT1G18260.1	AL1G30630.t1	0.00706721	0.119655	0.0590634	NG	98.4	668	679	11	0	0	673	99.1	1	679	679	100	100	1	679	679	0	1027	2656
1602	AT1G18265.1	AL1G30640.t1	0.056461	0.114444	0.493349	NG	79.8	217	272	34	4	21	229	84.2	8	279	281	96.8	96.8	1	251	253	1.48e-127	362	930
1603	AT1G18270.3	AL1G30650.t1	0.0133011	0.0860059	0.154653	NG	95.6	1333	1394	41	1	20	1352	97	1	1394	1394	100	100	1	1374	1374	0	2539	6580
1604	AT1G18280.1	AL1G30660.t1	0.021734	0.111275	0.195317	NG	91.8	168	183	12	2	3	170	92.9	1	181	181	100	100	1	182	182	1.57e-96	277	708
1605	AT1G18290.1	AL1G30670.t1	0.0559676	0.103466	0.540928	NG	88.8	159	179	18	1	2	167	93.3	1	177	177	100	100	1	179	179	2.23e-108	306	785
1606	AT1G18300.1	AL1G30680.t1	0.0103738	0.119609	0.0867312	NG	97.6	203	208	5	0	0	207	99.5	1	208	208	100	100	1	208	208	2.14e-148	410	1054
1607	AT1G18330.1	AL1G30700.t1	0.0515094	0.150642	0.341932	NG	87.6	311	355	36	4	8	326	91.8	1	347	347	100	100	1	355	355	2.28e-212	584	1505
1608	AT1G18335.1	AL1G30710.t1	0.032044	0.126	0.254318	NG	93.4	227	243	16	0	0	231	95.1	28	270	270	90	90	1	243	243	7.61e-155	431	1107
1609	AT1G18340.1	AL1G30720.t1	0.0131111	0.152189	0.0861501	NG	97	293	302	9	0	0	298	98.7	1	302	302	100	100	1	302	302	2.73e-216	590	1520
1610	AT1G18360.1	AL1G30780.t1	0.0248838	0.112148	0.221883	NG	91.9	362	394	21	2	11	373	94.7	1	383	383	100	100	1	394	394	1.26e-260	709	1830
1611	AT1G18370.1	AL5G21280.t1	0.284371	NA	NA	NG	57.6	571	992	346	22	75	716	72.2	6	975	975	99.5	99.5	5	943	943	0	939	2426
1612	AT1G18390.1	AL1G30800.t1	0.0774023	0.240825	0.321404	NG	62.4	557	892	90	7	245	590	66.1	1	649	649	100	100	1	890	890	0	994	2570
1613	AT1G18400.1	AL1G30810.t1	0.0247312	0.152391	0.162287	NG	76.9	193	251	53	1	5	195	77.7	16	261	261	94.3	94.3	1	251	251	2.5e-106	308	788
1614	AT1G18410.2	AL2G33680.t1	0.13797	0.680917	0.202624	NG	66.2	713	1077	212	12	152	810	75.2	2	1011	1011	99.9	99.9	1	992	992	0	1109	2868
1615	AT1G18420.1	AL1G30850.t1	0.0358611	0.135861	0.263955	NG	92.9	533	574	36	4	5	547	95.3	1	571	582	98.1	98.1	1	572	576	0	1008	2607
1616	AT1G18440.1	AL1G30870.t1	0.0236845	0.119198	0.198699	NG	92.7	268	289	14	1	7	274	94.8	1	289	289	100	100	1	282	282	3.49e-188	517	1332
1617	AT1G18450.1	AL1G30880.t1	0.00738202	0.112305	0.0657318	NG	98.6	436	442	6	0	0	440	99.5	1	442	442	100	100	1	442	442	1.24e-301	817	2111
1618	AT1G18470.1	AL1G30900.t1	0.0112635	0.144291	0.078061	NG	96.8	453	468	15	0	0	460	98.3	1	468	468	100	100	1	468	468	0	922	2383
1619	AT1G18480.1	AL1G30910.t1	0.0219153	0.167255	0.131029	NG	95.2	373	392	19	0	0	385	98.2	1	392	392	100	100	1	392	392	2.81e-284	769	1986
1620	AT1G18485.1	AL1G30920.t1	0.0367431	0.148542	0.247359	NG	90.4	878	971	76	2	17	913	94	1	971	971	100	100	1	954	954	0	1750	4533
1621	AT1G18490.1	AL1G30930.t1	0.0155645	0.123075	0.126464	NG	96.5	273	283	9	1	1	278	98.2	1	283	283	100	100	1	282	282	2.32e-205	560	1444
1622	AT1G18500.1	AL2G33895.t1	0.0757148	0.644835	0.117417	NG	81.4	526	646	86	7	34	566	87.6	1	632	632	100	100	1	626	626	0	989	2558
1623	AT1G18510.1	AL1G30950.t1	0.027272	0.188154	0.144945	NG	94	234	249	15	0	0	245	98.4	1	249	249	100	100	1	249	249	1.44e-180	495	1274
1624	AT1G18520.1	AL1G30960.t1	0.0145847	0.138407	0.105376	NG	97.1	265	273	7	1	1	271	99.3	1	272	272	100	100	1	273	273	1.5e-196	537	1384
1625	AT1G18530.1	AL1G30970.t1	0.00820649	0.351108	0.0233731	NG	98.7	156	158	2	0	0	158	100	1	158	158	100	100	1	158	158	1.14e-66	199	507
1626	AT1G18540.1	AL1G30980.t1	0.0112732	0.179648	0.0627514	NG	97.4	229	235	5	1	1	232	98.7	1	234	234	100	100	1	235	235	5.5e-155	429	1103
1627	AT1G18550.1	AL1G30990.t1	0.01513	0.118973	0.127172	NG	96	700	729	24	3	5	713	97.8	1	726	726	100	100	1	727	727	0	1236	3199
1628	AT1G18560.1	AL1G31000.t1	0.0194787	0.179671	0.108413	NG	79.7	554	695	25	4	116	567	81.6	1	691	691	100	100	1	583	583	0	1069	2764
1629	AT1G18570.1	AL1G31010.t1	0.031194	0.10356	0.301218	NG	89.8	317	353	36	0	0	329	93.2	1	353	353	100	100	1	353	353	1.1e-227	623	1606
1630	AT1G18580.1	AL1G31020.t1	0.0162406	0.147413	0.110171	NG	96.1	518	539	20	1	1	528	98	1	538	538	100	100	1	539	539	0	1060	2740
1631	AT1G18590.1	AL1G31030.t1	0.0243374	0.16149	0.150706	NG	94.5	328	347	19	0	0	337	97.1	1	347	347	100	100	1	347	347	2.99e-254	689	1779
1632	AT1G18600.1	AL1G31040.t1	0.0198656	0.130051	0.152752	NG	95.5	322	337	15	0	0	327	97	1	337	337	100	100	1	337	337	7.37e-234	637	1643
1633	AT1G18610.1	AL1G31050.t1	0.0169624	0.0916305	0.185117	NG	92.2	341	370	29	0	0	346	93.5	69	438	557	66.4	66.4	1	370	388	8.23e-235	651	1679
1634	AT1G18620.1	AL2G34060.t1	0.168977	0.647305	0.261047	NG	63.4	670	1057	282	26	105	761	72	1	979	979	100	100	1	1030	1030	0	1059	2739
1635	AT1G18630.1	AL1G31070.t1	0.032083	0.0636242	0.504257	NG	89.7	148	165	8	2	9	151	91.5	1	156	156	100	100	1	165	165	4.16e-77	226	576
1636	AT1G18640.2	AL1G31080.t1	0.023499	0.101973	0.230443	NG	94.6	281	297	15	1	1	289	97.3	1	296	296	100	100	1	297	297	9.32e-203	555	1430
1637	AT1G18650.1	AL1G31090.t1	0.0146908	0.0921621	0.159402	NG	80.9	127	157	27	1	3	128	81.5	32	185	185	83.2	83.2	1	157	157	1.03e-85	249	635
1638	AT1G18660.1	AL1G31110.t1	0.0092663	0.0994918	0.0931363	NG	97.9	372	380	8	0	0	375	98.7	108	487	487	78	78	1	380	380	3.09e-273	745	1923
1639	AT1G18670.1	AL2G34190.t1	0.0990803	0.595909	0.166267	NG	78.4	560	714	121	10	33	623	87.3	1	710	710	100	100	1	685	685	0	1068	2763
1640	AT1G18680.1	AL1G31130.t1	0.00983502	0.118605	0.0829222	NG	97.5	156	160	4	0	0	157	98.1	28	187	187	85.6	85.6	21	180	180	3.01e-118	332	851
1641	AT1G18690.1	AL1G31140.t1	0.0263478	0.150766	0.174759	NG	84.4	434	514	30	2	50	444	86.4	1	514	514	100	100	1	464	464	5.11e-305	840	2170
1642	AT1G18700.4	AL1G31150.t2	0.0207579	0.100703	0.206131	NG	92.1	661	718	40	2	17	677	94.3	1	716	716	100	100	1	703	703	0	1279	3309
1643	AT1G18710.1	AL1G31160.t1	0.0542447	0.104257	0.5203	NG	85	233	274	33	3	8	247	90.1	1	268	268	100	100	1	272	272	2.43e-155	433	1113
1644	AT1G18720.1	AL1G31190.t1	0.0127638	0.12034	0.106064	NG	97.1	201	207	6	0	0	202	97.6	1	207	207	100	100	1	207	207	2.49e-142	395	1014
1645	AT1G18730.1	AL1G31200.t1	0.0194894	0.118868	0.163958	NG	95.5	168	176	8	0	0	170	96.6	1	176	176	100	100	1	176	176	2.12e-121	339	870
1646	AT1G18740.1	AL1G31210.t1	0.0136605	0.143981	0.0948772	NG	97.1	372	383	11	0	0	378	98.7	1	383	383	100	100	1	383	383	3.46e-253	690	1780
1647	AT1G18750.4	AL1G31230.t1	0.00997929	0.096853	0.103035	NG	96.9	369	381	8	1	4	372	97.6	1	381	381	100	100	1	377	377	5.61e-257	699	1804
1648	AT1G18760.1	AL1G31240.t1	0.14075	0.171809	0.819224	NG	71.8	163	227	60	3	4	184	81.1	1	225	225	100	100	1	225	225	1.9e-102	295	756
1649	AT1G18780.1	AL1G31280.t1	0.141885	0.300922	0.471501	NG	49.9	216	433	72	8	145	244	56.4	28	326	326	91.7	91.7	1	422	422	8.65e-96	290	741
1650	AT1G18790.1	AL1G31300.t1	0.0411425	0.110449	0.372503	NG	89.1	244	274	20	2	10	253	92.3	1	266	270	98.5	98.5	2	273	288	3.14e-153	428	1101
1651	AT1G18810.1	AL1G31320.t1	0.0278978	0.0896785	0.311087	NG	87.4	339	388	33	3	16	349	89.9	1	388	388	100	100	1	372	372	2.37e-208	576	1485
1652	AT1G18830.1	AL5G46320.t1	0.171519	0.606225	0.28293	NG	59.7	668	1118	289	17	161	765	68.4	1	970	970	100	100	1	1105	1105	0	1134	2932
1653	AT1G18835.1	AL1G31360.t1	0.0060049	0.13428	0.0447191	NG	98.6	72	73	1	0	0	73	100	17	89	89	82	82	1	73	73	1.67e-51	155	392
1654	AT1G18840.1	AL1G31380.t1	0.0447821	0.140906	0.317816	NG	84.7	486	574	87	1	1	507	88.3	1	573	573	100	100	1	574	574	6.93e-296	814	2102
1655	AT1G18850.1	AL1G31390.t1	0.0186138	0.114855	0.162064	NG	96	384	400	16	0	0	388	97	1	400	400	100	100	1	400	400	2.24e-269	732	1890
1656	AT1G18860.1	AL1G31400.t1	0.053919	0.168329	0.320318	NG	85.5	461	539	60	6	18	486	90.2	1	529	529	100	100	1	531	531	1.4e-294	807	2084
1657	AT1G18880.1	AL1G31450.t1	0.0221128	0.141484	0.156292	NG	95.4	561	588	27	0	0	570	96.9	1	588	588	100	100	1	588	588	0	1107	2864
1658	AT1G18890.1	AL2G34630.t1	0.0782997	0.724485	0.108076	NG	86.1	471	547	70	3	6	501	91.6	1	546	546	100	100	1	542	542	0	915	2365
1659	AT1G18900.1	AL1G31480.t1	0.0162954	0.128007	0.127301	NG	96.6	832	861	29	0	0	850	98.7	1	861	861	100	100	1	861	861	0	1079	2791
1660	AT1G18910.1	AL2G34650.t1	0.17193	0.77015	0.223242	NG	68.2	879	1289	351	11	59	1015	78.7	1	1255	1255	100	100	1	1264	1264	0	1721	4457
1661	AT1G18940.1	AL1G31500.t1	0.0332289	0.162522	0.204457	NG	93	490	527	37	0	0	506	96	1	527	527	100	100	1	527	527	0	960	2482
1662	AT1G18950.2	AL1G31510.t1	0.0145832	0.092819	0.157114	NG	92.8	706	761	41	4	14	709	93.2	1	757	757	100	100	1	751	751	0	1054	2725
1663	AT1G18960.1	AL1G31520.t1	0.0333844	0.22749	0.146751	NG	91.9	285	310	23	2	2	293	94.5	1	308	308	100	100	1	310	310	1.64e-200	550	1418
1664	AT1G18970.1	AL1G31530.t1	0.0300088	0.163167	0.183915	NG	94.1	206	219	13	0	0	210	95.9	1	219	221	99.1	99.1	1	219	221	2.36e-147	409	1050
1665	AT1G18980.1	AL1G31540.t1	0.0321851	0.17709	0.181745	NG	94.1	208	221	13	0	0	214	96.8	1	221	221	100	100	1	221	221	8.22e-148	410	1053
1666	AT1G18990.1	AL1G31550.t1	0.0225391	0.14474	0.155721	NG	94.9	498	525	26	1	1	512	97.5	1	525	525	100	100	1	524	524	0	951	2459
1667	AT1G19000.1	AL1G31560.t1	0.0334844	0.210986	0.158704	NG	92.7	267	288	19	1	2	270	93.8	1	286	286	100	100	1	288	288	3.38e-182	502	1293
1668	AT1G19010.1	AL1G31570.t1	0.0451823	0.155705	0.290179	NG	87.5	280	320	38	1	2	292	91.3	1	320	320	100	100	1	318	318	3.06e-171	477	1228
1669	AT1G19020.1	AL1G31580.t1	0.031117	0.111002	0.280329	NG	92.9	79	85	6	0	0	82	96.5	1	85	87	97.7	97.7	1	85	86	2.74e-52	157	398
1670	AT1G19025.1	AL1G31600.t1	0.030921	0.170719	0.181122	NG	93.3	513	550	35	1	2	528	96	1	550	550	100	100	1	548	548	0	1035	2677
1671	AT1G19050.1	AL1G31620.t1	0.0350865	0.177489	0.197683	NG	91.4	192	210	15	1	3	199	94.8	1	207	207	100	100	1	210	210	4.84e-127	356	914
1672	AT1G19080.1	AL5G36640.t1	0.00470558	0.224943	0.020919	NG	98.9	184	186	2	0	0	186	100	1	186	186	100	100	1	186	186	1.22e-134	374	959
1673	AT1G19086.1	AL1G31650.t1	0.187584	0.44181	0.42458	NG	87.5	35	40	5	0	0	36	90	90	129	154	26	26	16	55	56	6.13e-17	70.1	170
1674	AT1G19100.1	AL1G31670.t1	0.0224407	0.0943646	0.237808	NG	95.3	633	664	31	0	0	642	96.7	1	664	664	100	100	1	664	664	0	1203	3112
1675	AT1G19110.1	AL1G31680.t1	0.0139131	0.164621	0.0845158	NG	97	732	755	23	0	0	742	98.3	1	755	755	100	100	1	755	755	0	1405	3638
1676	AT1G19115.1	AL1G31690.t2	0.0343647	0.0807076	0.425793	NG	90.3	159	176	13	2	4	165	93.8	1	175	175	100	100	1	173	173	1.08e-104	297	760
1677	AT1G19115.4	AL1G31690.t1	0.0311942	0.0793456	0.393143	NG	91.1	163	179	12	2	4	168	93.9	1	178	178	100	100	1	176	176	1.72e-107	304	779
1678	AT1G19120.1	AL1G31700.t1	0.0101823	0.110811	0.0918888	NG	97.7	126	129	3	0	0	127	98.4	1	129	129	100	100	1	129	129	2.78e-83	239	610
1679	AT1G19130.1	AL1G31710.t1	0.0116816	0.0964135	0.121162	NG	97.4	184	189	5	0	0	185	97.9	5	193	193	97.9	97.9	1	189	189	9.31e-137	379	974
1680	AT1G19140.1	AL1G31720.t1	0.0144075	0.128458	0.112157	NG	95.5	299	313	9	2	5	304	97.1	1	312	312	100	100	1	309	309	1.82e-207	568	1464
1681	AT1G19150.1	AL1G31730.t1	0.0172341	0.122162	0.141076	NG	95.9	260	271	10	1	1	264	97.4	1	271	271	100	100	1	270	270	1.5e-195	535	1377
1682	AT1G19160.1	AL1G31740.t1	0.116464	0.151554	0.768464	NG	76.6	272	355	78	2	5	299	84.2	1	351	351	100	100	1	354	354	7.51e-198	547	1410
1683	AT1G19170.1	AL1G31750.t1	0.0126867	0.159509	0.0795357	NG	97.2	493	507	14	0	0	497	98	1	507	507	100	100	1	507	507	0	965	2494
1684	AT1G19180.1	AL1G31760.t1	0.0244899	0.117317	0.208749	NG	89.8	239	266	14	3	13	244	91.7	1	254	254	100	100	1	265	265	1.96e-158	440	1131
1685	AT1G19190.1	AL1G31770.t1	0.133578	0.244023	0.547399	NG	85.3	244	286	42	0	0	261	91.3	1	286	319	89.7	89.7	1	286	315	1.36e-180	501	1289
1686	AT1G19200.2	AL1G31780.t1	0.121728	0.171392	0.710227	NG	76.4	175	229	52	2	2	189	82.5	1	229	229	100	100	1	227	227	1.84e-120	341	875
1687	AT1G19210.1	AL1G31790.t1	0.0274295	0.174848	0.156876	NG	94.1	175	186	9	2	2	179	96.2	2	186	186	99.5	99.5	3	187	187	3.45e-123	345	884
1688	AT1G19220.1	AL6G32290.t1	0.246961	1.98048	0.124698	NG	54.5	670	1230	355	29	205	785	63.8	1	1087	1087	100	100	1	1168	1168	0	1024	2647
1689	AT1G19230.1	AL1G31810.t1	0.0120313	0.121284	0.0991987	NG	94.5	901	953	25	2	27	912	95.7	1	927	927	100	100	1	952	952	0	1758	4552
1690	AT1G19240.1	AL1G31820.t1	0.0399146	0.173517	0.230033	NG	84.8	89	105	15	1	1	91	86.7	1	105	105	100	100	1	104	104	3.91e-58	174	440
1691	AT1G19250.1	AL1G31830.t1	0.0245043	0.128123	0.191256	NG	95.4	503	527	23	1	1	513	97.3	1	527	531	99.2	99.2	1	526	531	0	1036	2679
1692	AT1G19260.1	AL8G24810.t1	0.174204	0.905381	0.19241	NG	72.7	526	724	170	3	28	614	84.8	3	726	770	94	94	8	703	924	0	1042	2694
1693	AT1G19270.1	AL1G31850.t1	0.00890239	0.104992	0.0847911	NG	95.5	510	534	21	3	3	514	96.3	1	533	533	100	100	1	532	532	0	944	2439
1694	AT1G19290.1	AL1G31880.t1	0.0319696	0.14114	0.226511	NG	95.8	867	905	37	1	1	874	96.6	1	905	905	100	100	1	904	904	1.74e-217	640	1650
1695	AT1G19300.1	AL1G31890.t1	0.00831545	0.173865	0.047827	NG	97.5	344	353	6	2	3	345	97.7	1	352	352	100	100	1	351	351	3.74e-248	674	1740
1696	AT1G19310.1	AL1G31900.t1	0.0194095	0.188357	0.103046	NG	96	218	227	9	0	0	224	98.7	1	227	227	100	100	1	227	227	6.6e-166	456	1173
1697	AT1G19320.1	AL1G31910.t1	0.0507879	0.242488	0.209445	NG	90	224	249	24	1	1	230	92.4	1	248	248	100	100	1	249	249	5.23e-160	443	1139
1698	AT1G19330.1	AL1G31920.t2	0.0105229	0.0957892	0.109855	NG	97.6	242	248	6	0	0	243	98	1	248	248	100	100	1	248	248	4.39e-170	468	1205
1699	AT1G19330.2	AL1G31920.t1	0.0107295	0.0983168	0.109132	NG	97.5	237	243	6	0	0	238	97.9	1	243	243	100	100	1	243	243	1.12e-165	457	1175
1700	AT1G19340.1	AL1G31930.t1	0.0358458	0.129669	0.276441	NG	90.3	373	413	36	1	4	390	94.4	1	413	415	99.5	99.5	1	409	411	2.68e-279	758	1958
1701	AT1G19350.1	AL1G31940.t1	0.00998886	0.177852	0.0561641	NG	98.5	328	333	4	1	1	330	99.1	1	333	336	99.1	99.1	1	332	334	3.85e-196	541	1395
1702	AT1G19360.1	AL1G31950.t1	0.015283	0.15518	0.0984859	NG	96.7	415	429	14	0	0	421	98.1	1	429	429	100	100	1	429	429	1.18e-297	806	2082
1703	AT1G19370.1	AL1G31960.t1	0.01935	0.168061	0.115137	NG	94.9	580	611	24	4	7	588	96.2	1	606	606	100	100	1	609	609	0	1103	2852
1704	AT1G19380.1	AL1G31980.t1	0.0470416	0.163307	0.288056	NG	91	132	145	12	1	1	138	95.2	1	145	148	98	98	1	144	147	1.07e-89	257	656
1705	AT1G19397.1	AL1G31990.t1	0.114537	0.27411	0.417851	NG	80.4	41	51	9	1	1	43	84.3	12	61	99	50.5	50.5	1	51	58	8.88e-22	80.5	197
1706	AT1G19400.1	AL1G32020.t1	0.0306568	0.109055	0.281113	NG	92.5	282	305	21	2	2	293	96.1	1	304	304	100	100	1	304	304	1.05e-189	523	1346
1707	AT1G19410.1	AL1G32030.t1	0.131277	0.24667	0.532196	NG	52.5	218	415	59	7	138	233	56.1	1	389	436	89.2	89.2	1	303	353	2.25e-111	331	849
1708	AT1G19430.1	AL1G32180.t1	0.0172963	0.123939	0.139555	NG	92.1	668	725	53	1	4	678	93.5	1	725	725	100	100	1	721	721	0	1350	3493
1709	AT1G19440.1	AL1G32190.t1	0.00593706	0.129596	0.045812	NG	98.5	509	517	7	1	1	514	99.4	1	517	517	100	100	1	516	516	0	1015	2624
1710	AT1G19450.1	AL1G32200.t1	0.00918504	0.108718	0.084485	NG	98	479	489	9	1	1	484	99	1	489	489	100	100	1	488	488	0	910	2351
1711	AT1G19470.1	AL1G32210.t1	0.0765701	0.186681	0.410166	NG	53	219	413	44	2	150	233	56.4	1	413	413	100	100	1	263	263	5.75e-122	354	908
1712	AT1G19480.1	AL1G32220.t1	0.0309336	0.179396	0.172432	NG	93	357	384	24	3	3	364	94.8	1	383	383	100	100	1	382	382	9.97e-255	694	1790
1713	AT1G19485.1	AL1G32230.t1	0.0342593	0.111651	0.306842	NG	90.2	637	706	62	4	7	652	92.4	114	816	816	86.2	86.2	1	702	702	0	1248	3229
1714	AT1G19490.1	AL1G32240.t1	0.0272795	0.151113	0.180524	NG	92.2	435	472	29	4	8	448	94.9	1	472	472	100	100	1	464	464	2.14e-290	791	2043
1715	AT1G19500.1	AL1G32250.t1	0.057143	0.130972	0.436301	NG	87.7	71	81	10	0	0	78	96.3	1	81	81	100	100	1	81	81	5.51e-45	139	349
1716	AT1G19510.1	AL1G32260.t1	0.00418614	0.106469	0.0393179	NG	99	100	101	1	0	0	101	100	1	101	101	100	100	1	101	101	7.13e-66	193	490
1717	AT1G19520.1	AL1G32270.t1	0.0179451	0.133536	0.134384	NG	94.7	693	732	29	2	10	711	97.1	1	722	726	99.4	99.4	1	732	733	0	1146	2965
1718	AT1G19530.1	AL1G32280.t1	0.0481589	0.17004	0.28322	NG	89.8	106	118	12	0	0	110	93.2	1	118	118	100	100	1	118	118	1.43e-73	214	544
1719	AT1G19540.1	AL1G32290.t1	0.0333923	0.150677	0.221615	NG	92.6	288	311	21	1	2	297	95.5	1	311	311	100	100	1	309	309	1.53e-201	553	1425
1720	AT1G19565.1	AL1G32170.t1	0.22122	0.292809	0.755512	NG	41.5	125	301	41	3	135	144	47.8	47	215	215	78.6	78.6	41	338	338	5.8e-64	201	511
1721	AT1G19570.1	AL1G32300.t1	0.0205323	0.241556	0.0850002	NG	96.3	206	214	8	0	0	207	96.7	1	214	214	100	100	1	214	214	2.59e-152	421	1081
1722	AT1G19580.1	AL1G32310.t1	0.00804385	0.12479	0.064459	NG	98.2	271	276	5	0	0	272	98.6	1	276	276	100	100	1	276	276	1.97e-196	537	1384
1723	AT1G19600.1	AL1G32320.t1	0.0149531	0.0963137	0.155254	NG	96.6	344	356	12	0	0	349	98	1	356	356	100	100	1	356	356	1.66e-251	683	1763
1724	AT1G19610.1	AL1G32330.t1	0.0109295	0.0413843	0.264099	NG	97.5	77	79	2	0	0	77	97.5	1	79	79	100	100	1	79	79	6.98e-56	166	420
1725	AT1G19620.1	AL1G32340.t1	0.118122	0.169254	0.697896	NG	60.2	204	339	62	6	73	226	66.7	1	304	318	95.6	95.6	1	301	332	5.72e-89	269	687
1726	AT1G19630.1	AL1G32350.t1	0.0228441	0.112121	0.203745	NG	95	454	478	23	1	1	464	97.1	1	477	477	100	100	1	478	478	0	903	2334
1727	AT1G19640.1	AL1G32360.t1	0.0225298	0.122278	0.18425	NG	94.9	370	390	20	0	0	380	97.4	1	390	390	100	100	1	390	390	3.59e-270	733	1893
1728	AT1G19650.1	AL1G32370.t1	0.033283	0.177607	0.187396	NG	91.9	566	616	43	3	7	587	95.3	1	609	609	100	100	1	616	616	0	1100	2845
1729	AT1G19660.1	AL1G32380.t1	0.0200928	0.117072	0.171627	NG	94.5	312	330	15	1	3	321	97.3	1	330	330	100	100	1	327	327	1.47e-222	608	1567
1730	AT1G19670.1	AL1G32390.t1	0.0205621	0.157376	0.130656	NG	95.4	310	325	15	0	0	319	98.2	1	325	325	100	100	1	325	325	5.02e-235	639	1648
1731	AT1G19680.1	AL1G32400.t1	0.0628179	0.159211	0.394559	NG	86	388	451	55	3	8	405	89.8	1	445	445	100	100	1	449	449	4.4e-263	720	1859
1732	AT1G19690.1	AL1G32410.t1	0.0472407	0.151501	0.311818	NG	89.8	318	354	35	1	1	333	94.1	1	353	353	100	100	1	354	354	3.59e-231	632	1629
1733	AT1G19700.1	AL1G32420.t1	0.0171213	0.127608	0.134171	NG	94.6	511	540	20	5	9	520	96.3	1	539	539	100	100	1	532	532	0	894	2311
1734	AT1G19710.1	AL1G32430.t1	0.0122942	0.148706	0.082674	NG	97.3	468	481	12	1	1	474	98.5	1	480	480	100	100	1	481	481	0	904	2336
1735	AT1G19715.1	AL1G32440.t1	0.0255758	0.127737	0.200222	NG	94.3	561	595	34	0	0	584	98.2	1	595	596	99.8	99.8	1	595	597	0	1198	3100
1736	AT1G19720.1	AL1G32450.t1	0.0205302	0.123636	0.166054	NG	95.5	855	895	40	0	0	873	97.5	1	895	895	100	100	1	895	895	0	1452	3760
1737	AT1G19730.1	AL1G32460.t1	0.0255775	0.186773	0.136944	NG	94.2	113	120	7	0	0	114	95	1	120	120	100	100	1	120	120	1.54e-78	226	577
1738	AT1G19740.1	AL1G32470.t1	0.00160201	0.198832	0.00805711	NG	99.3	277	279	1	1	1	277	99.3	1	279	279	100	100	1	278	278	5.63e-195	534	1375
1739	AT1G19770.1	AL1G32480.t1	0.0116929	0.221254	0.0528485	NG	97.7	383	392	9	0	0	389	99.2	1	392	394	99.5	99.5	1	392	394	2.65e-274	744	1921
1740	AT1G19790.1	AL1G32500.t1	0.0343464	0.146473	0.234489	NG	89.7	312	348	30	4	6	319	91.7	1	344	346	99.4	99.4	1	346	348	2.01e-197	546	1406
1741	AT1G19800.1	AL1G32520.t1	0.0127651	0.172236	0.074114	NG	97.2	341	351	10	0	0	346	98.6	1	351	351	100	100	1	351	351	1.91e-243	662	1709
1742	AT1G19830.1	AL1G32530.t1	0.0185953	0.0803252	0.2315	NG	96.6	114	118	4	0	0	115	97.5	1	118	118	100	100	1	118	118	4.63e-79	228	580
1743	AT1G19835.1	AL1G32550.t1	0.0204935	0.174404	0.117505	NG	93.3	921	987	62	1	4	939	95.1	1	983	983	100	100	1	987	987	0	1672	4330
1744	AT1G19840.1	AL1G32560.t1	0.00289027	0.180244	0.0160354	NG	99.4	153	154	1	0	0	154	100	1	154	154	100	100	1	154	154	2.13e-108	305	780
1745	AT1G19850.1	AL1G32580.t1	0.0130446	0.151908	0.0858715	NG	95.8	867	905	36	2	2	884	97.7	1	903	903	100	100	1	905	905	0	1705	4415
1746	AT1G19860.1	AL1G32590.t1	0.0342368	0.116448	0.294009	NG	90.3	380	421	29	7	12	391	92.9	1	414	414	100	100	1	416	416	1.79e-262	716	1848
1747	AT1G19860.2	AL1G32590.t2	0.035806	0.117104	0.305764	NG	89.9	363	404	29	7	12	374	92.6	20	416	416	95.4	95.4	1	399	399	7.1e-247	676	1744
1748	AT1G19870.1	AL1G32600.t1	0.0316868	0.101704	0.311559	NG	88.7	706	796	86	4	4	727	91.3	1	795	795	100	100	1	793	793	0	1196	3095
1749	AT1G19880.1	AL1G32610.t1	0.0114194	0.138087	0.0826971	NG	97	521	537	14	2	2	528	98.3	1	537	539	99.6	99.6	1	535	537	0	930	2403
1750	AT1G19890.1	AL1G32620.t1	0.0129822	0.179536	0.0723093	NG	97.1	135	139	3	1	1	136	97.8	1	138	138	100	100	1	139	139	6.07e-87	249	636
1751	AT1G19900.1	AL1G32630.t1	0.039253	0.163086	0.240689	NG	92.2	507	550	42	1	1	529	96.2	1	549	549	100	100	1	550	550	0	1043	2696
1752	AT1G19910.1	AL1G32640.t1	0.00274077	0.0315491	0.0868733	NG	99.4	165	166	1	0	0	166	100	1	166	166	100	100	1	166	166	2.03e-96	275	704
1753	AT1G19910.2	AL1G32640.t2	0.00369555	0.0214138	0.172578	NG	99.2	122	123	1	0	0	123	100	1	123	123	100	100	1	123	123	9.46e-70	204	520
1754	AT1G19920.1	AL1G32650.t1	0.0160671	0.168296	0.0954689	NG	96.4	405	420	15	0	0	417	99.3	58	477	477	88.1	88.1	1	420	420	1.5e-305	835	2158
1755	AT1G19930.1	AL2G16730.t1	0.136309	0.215021	0.633933	NG	65.6	238	363	79	6	46	264	72.7	2	319	345	92.2	92.2	9	370	374	1e-156	444	1141
1756	AT1G19940.1	AL1G32660.t1	0.0246045	0.160053	0.153727	NG	93.6	484	517	32	1	1	499	96.5	1	516	516	100	100	1	517	517	0	980	2534
1757	AT1G19950.1	AL1G32670.t1	0.0404739	0.0953062	0.424673	NG	86.4	273	316	37	2	6	284	89.9	1	316	316	100	100	1	310	310	9.76e-158	442	1138
1758	AT1G19960.1	AL1G32680.t1	0.0357142	0.110559	0.323034	NG	83.1	54	65	11	0	0	54	83.1	1	65	65	100	100	1	65	65	6.65e-21	77	188
1759	AT1G19970.1	AL1G32700.t1	0.00974351	0.115488	0.0843684	NG	97.8	267	273	6	0	0	271	99.3	1	273	273	100	100	1	273	273	7.11e-193	528	1360
1760	AT1G19980.1	AL1G32710.t1	0.0426364	0.115423	0.369393	NG	90.1	309	343	33	1	1	319	93	1	343	343	100	100	1	342	342	4.57e-194	537	1383
1761	AT1G19990.1	AL1G32720.t1	0.0308685	0.154245	0.200127	NG	89.5	128	143	15	0	0	131	91.6	54	196	252	56.7	56.7	56	198	256	2.17e-49	162	411
1762	AT1G20000.1	AL1G32730.t1	0.0335099	0.145469	0.230358	NG	81	141	174	11	3	22	144	82.8	32	205	205	84.9	84.9	1	152	152	7.67e-85	247	631
1763	AT1G20020.1	AL1G32800.t1	0.00813399	0.116093	0.0700644	NG	98.1	363	370	7	0	0	366	98.9	1	370	370	100	100	1	370	370	2.95e-268	727	1876
1764	AT1G20030.1	AL1G32810.t1	0.0209984	0.241548	0.0869327	NG	93.1	284	305	15	2	6	289	94.8	1	300	300	100	100	1	304	304	1.48e-204	560	1443
1765	AT1G20050.1	AL1G32850.t1	0.032418	0.180678	0.179424	NG	92	206	224	15	1	3	210	93.8	1	224	224	100	100	1	221	221	1.21e-143	399	1026
1766	AT1G20060.1	AL1G32860.t1	0.0770294	0.170871	0.450804	NG	82.2	825	1004	130	9	49	857	85.4	1	971	971	100	100	1	988	988	0	1290	3337
1767	AT1G20070.1	AL1G32880.t1	0.0814913	0.190433	0.427926	NG	84.6	165	195	28	2	2	177	90.8	1	194	194	100	100	1	194	194	1.57e-109	311	796
1768	AT1G20080.1	AL1G32890.t1	0.00964419	0.110966	0.0869111	NG	97.8	526	538	12	0	0	535	99.4	1	538	538	100	100	1	538	538	0	1043	2696
1769	AT1G20090.1	AL1G32900.t1	0.00222401	0.213239	0.0104297	NG	99.5	194	195	1	0	0	195	100	2	196	196	99.5	99.5	3	197	197	1.46e-138	384	987
1770	AT1G20110.1	AL1G32920.t1	0.0186356	0.112937	0.165009	NG	90.5	550	608	50	4	8	557	91.6	1	602	602	100	100	1	606	606	0	1005	2598
1771	AT1G20120.1	AL1G32940.t1	0.0256243	0.102154	0.250841	NG	93.6	351	375	21	1	3	358	95.5	32	403	403	92.3	92.3	1	375	375	2.87e-246	673	1736
1772	AT1G20130.2	AL1G32950.t1	0.0201995	0.134769	0.149882	NG	84	284	338	13	1	41	289	85.5	178	515	515	65.6	65.6	153	449	449	7.54e-197	555	1431
1773	AT1G20132.1	AL1G32960.t1	0.0271891	0.114256	0.237967	NG	94.2	358	380	22	0	0	368	96.8	5	384	384	99	99	11	390	390	4.88e-255	695	1793
1774	AT1G20135.1	AL1G32970.t1	0.0188436	0.11651	0.161734	NG	96	315	328	13	0	0	322	98.2	1	328	329	99.7	99.7	1	328	340	5.12e-235	640	1650
1775	AT1G20140.1	AL4G11370.t1	0.0390538	0.33424	0.116843	NG	92.5	147	159	12	0	0	152	95.6	6	164	164	97	97	4	162	162	1.36e-104	296	757
1776	AT1G20150.1	AL1G32990.t1	0.025028	0.126843	0.197315	NG	94.7	701	740	38	1	1	721	97.4	37	775	781	94.6	94.6	1	740	745	0	1390	3598
1777	AT1G20160.1	AL1G33000.t1	0.0156996	0.153493	0.102282	NG	96.6	744	770	26	0	0	757	98.3	1	770	770	100	100	1	770	770	0	1457	3772
1778	AT1G20180.1	AL1G33020.t1	0.0304252	0.144643	0.210346	NG	92.6	363	392	26	2	3	375	95.7	1	391	391	100	100	1	390	390	2.4e-250	683	1763
1779	AT1G20190.1	AL1G33030.t1	0.0105489	0.157317	0.0670548	NG	97.6	247	253	6	0	0	252	99.6	1	253	253	100	100	1	253	253	1.56e-186	510	1314
1780	AT1G20200.1	AL1G33040.t1	0.0103291	0.303049	0.0340841	NG	98.3	455	463	8	0	0	460	99.4	1	463	489	94.7	94.7	1	463	489	0	880	2274
1781	AT1G20220.1	AL1G33060.t1	0.0238653	0.117992	0.202262	NG	89.1	286	321	27	4	8	290	90.3	1	316	316	100	100	1	318	318	9.27e-127	364	935
1782	AT1G20225.1	AL1G33070.t1	0.0231963	0.152777	0.151831	NG	95.3	223	234	11	0	0	227	97	1	234	234	100	100	1	234	234	3.11e-163	450	1157
1783	AT1G20230.1	AL1G33080.t1	0.0256503	0.122507	0.209378	NG	87.9	669	761	92	0	0	689	90.5	1	761	761	100	100	1	761	761	0	1343	3477
1784	AT1G20240.1	AL1G33090.t1	0.0905034	0.187227	0.483388	NG	78.3	436	557	88	3	33	469	84.2	14	564	567	97.2	97.2	1	530	532	2.73e-305	846	2185
1785	AT1G20270.1	AL1G33120.t1	0.0014937	0.0948234	0.0157524	NG	99.7	287	288	1	0	0	288	100	1	288	288	100	100	1	288	288	1.29e-207	566	1460
1786	AT1G20300.1	AL1G33130.t1	0.020181	0.159241	0.126733	NG	91.3	491	538	47	0	0	499	92.8	1	538	538	100	100	1	538	538	1.88e-175	505	1301
1787	AT1G20310.1	AL1G33140.t1	0.0595241	0.125104	0.475795	NG	81.3	195	240	27	2	18	208	86.7	16	241	241	93.8	93.8	1	236	236	1.71e-128	362	930
1788	AT1G20320.1	AL1G33150.t1	0.0389925	0.182671	0.213457	NG	91.5	258	282	23	1	1	269	95.4	1	282	343	82.2	82.2	1	281	282	4.22e-187	517	1331
1789	AT1G20330.1	AL1G33160.t1	0.00120272	0.154356	0.00779185	NG	98.6	361	366	1	1	4	362	98.9	1	362	362	100	100	1	366	366	8.12e-272	735	1898
1790	AT1G20340.1	AL1G33170.t1	0.01623	0.156681	0.103586	NG	96.4	162	168	6	0	0	166	98.8	1	168	168	100	100	1	168	168	2.39e-105	298	763
1791	AT1G20350.1	AL1G33180.t1	0.0685458	0.14259	0.480719	NG	82.5	188	228	31	2	9	202	88.6	1	219	219	100	100	1	228	228	1.14e-130	367	941
1792	AT1G20370.1	AL1G33250.t1	0.0220124	0.059319	0.371085	NG	86.3	496	575	23	5	56	504	87.7	1	550	550	100	100	384	927	927	0	947	2447
1793	AT1G20380.1	AL1G33310.t1	0.0156832	0.0954042	0.164387	NG	96.6	707	732	25	0	0	719	98.2	1	732	732	100	100	1	732	732	0	1457	3771
1794	AT1G20400.1	AL9U10150.t2	0.545722	2.00841	0.271719	NG	38.8	322	829	432	16	75	437	52.7	150	904	945	79.9	79.9	10	837	871	1.11e-133	422	1086
1795	AT1G20410.1	AL1G33260.t1	0.0153549	0.045958	0.334107	NG	92.7	468	505	18	1	19	476	94.3	1	505	505	100	100	24	509	509	0	899	2323
1796	AT1G20430.1	AL1G33360.t1	0.0189062	0.107054	0.176605	NG	96.6	113	117	4	0	0	115	98.3	1	117	117	100	100	1	117	117	5.43e-73	212	540
1797	AT1G20440.1	AL1G33370.t1	0.0338719	0.142826	0.237155	NG	94	250	266	15	1	1	254	95.5	1	266	266	100	100	1	265	265	3.21e-116	333	855
1798	AT1G20450.2	AL1G33380.t1	0.0663041	0.26192	0.253146	NG	79.1	208	263	42	4	13	222	84.4	1	258	260	99.2	99.2	1	255	257	9.62e-78	235	600
1799	AT1G20470.1	AL1G33400.t1	0.00581561	0.141994	0.0409568	NG	98	145	148	2	1	1	147	99.3	1	147	147	100	100	1	148	148	4.9e-104	293	750
1800	AT1G20480.1	AL1G33410.t1	0.025192	0.134773	0.186922	NG	94.3	534	566	30	1	2	548	96.8	1	566	566	100	100	1	564	564	0	1041	2692
1801	AT1G20500.1	AL1G33420.t1	0.0368141	0.270991	0.13585	NG	92.1	502	545	39	2	4	517	94.9	9	551	551	98.5	98.5	8	550	550	0	977	2525
1802	AT1G20510.1	AL1G33440.t1	0.00812395	0.0901207	0.0901452	NG	98.4	538	547	9	0	0	544	99.5	1	547	547	100	100	1	547	547	0	1041	2691
1803	AT1G20520.1	AL1G33450.t1	0.0192063	0.0586329	0.327569	NG	95.1	175	184	8	1	1	183	99.5	49	232	232	79.3	79.3	1	183	183	6.01e-119	336	861
1804	AT1G20530.1	AL1G33460.t1	0.0333547	0.158329	0.210667	NG	91.9	566	616	46	2	4	582	94.5	1	615	615	100	100	1	613	613	0	1055	2728
1805	AT1G20540.1	AL1G33470.t1	0.0112319	0.0999912	0.112329	NG	97.7	344	352	8	0	0	350	99.4	1	352	352	100	100	1	352	352	4.67e-265	717	1851
1806	AT1G20550.1	AL2G36350.t1	0.100598	0.919361	0.109421	NG	80.3	464	578	96	5	18	508	87.9	1	565	565	100	100	1	573	573	0	904	2337
1807	AT1G20560.1	AL1G33490.t1	0.0157822	0.155842	0.10127	NG	96	534	556	21	1	1	544	97.8	3	557	557	99.6	99.6	1	556	556	0	1074	2778
1808	AT1G20575.1	AL1G33510.t1	0.00534405	0.0720733	0.0741474	NG	98.8	244	247	3	0	0	245	99.2	1	247	247	100	100	1	247	247	1.32e-175	482	1241
1809	AT1G20580.1	AL1G33520.t1	0.00336828	0.0771787	0.0436426	NG	99.2	131	132	1	0	0	131	99.2	1	132	132	100	100	1	132	132	9.6e-90	256	653
1810	AT1G20610.1	AL1G33530.t1	0.0254077	0.103104	0.246428	NG	93.7	403	430	25	1	2	415	96.5	1	430	430	100	100	1	428	428	3.87e-287	780	2013
1811	AT1G20620.1	AL1G33580.t2	0.0244704	0.170713	0.143343	NG	96.1	473	492	18	1	1	478	97.2	1	492	493	99.8	99.8	1	491	505	0	996	2576
1812	AT1G20620.2	AL1G33580.t1	0.00513587	0.135092	0.0380177	NG	98.8	415	420	5	0	0	417	99.3	1	420	428	98.1	98.1	1	420	421	0	880	2274
1813	AT1G20630.1	AL1G33590.t1	0.00437356	0.100551	0.0434961	NG	99	488	493	5	0	0	491	99.6	1	493	493	100	100	1	493	493	0	1031	2666
1814	AT1G20640.1	AL2G36450.t1	0.126702	0.760564	0.16659	NG	70.2	604	860	180	18	76	675	78.5	1	838	845	99.2	99.2	1	806	811	0	1113	2878
1815	AT1G20650.1	AL1G33610.t1	0.00577875	0.139795	0.0413372	NG	98.7	377	382	5	0	0	379	99.2	1	382	382	100	100	1	382	382	1.68e-280	759	1959
1816	AT1G20670.1	AL1G33640.t1	0.0239168	0.130364	0.183461	NG	88.8	584	658	55	6	19	593	90.1	1	653	653	100	100	1	644	644	0	997	2577
1817	AT1G20680.1	AL1G33650.t1	0.115602	0.147963	0.781289	NG	80.2	194	242	48	0	0	221	91.3	31	272	272	89	89	10	251	251	5.58e-141	396	1017
1818	AT1G20687.1	AL1G33660.t1	0.127641	0.0862799	1.47938	NG	68.8	53	77	22	1	2	63	81.8	2	78	79	97.5	97.5	158	232	455	5.44e-31	112	279
1819	AT1G20693.1	AL1G33670.t1	NA	0.117637	0	NG	100	145	145	0	0	0	145	100	1	145	145	100	100	1	145	145	9.47e-85	244	623
1820	AT1G20696.1	AL1G33680.t1	0.0212184	0.192352	0.11031	NG	95.1	135	142	7	0	0	137	96.5	1	142	142	100	100	1	142	142	1.91e-78	228	581
1821	AT1G20700.1	AL1G33690.t1	0.0288787	0.169832	0.170043	NG	94.2	194	206	12	0	0	201	97.6	7	212	212	97.2	97.2	2	207	207	1.33e-136	380	977
1822	AT1G20710.1	AL1G33700.t1	0.0558598	0.187121	0.298522	NG	78.8	156	198	42	0	0	162	81.8	1	198	198	100	100	1	198	198	4.07e-107	305	781
1823	AT1G20720.2	AL1G33710.t1	0.0187444	0.072856	0.257281	NG	95.2	1214	1275	54	3	7	1239	97.2	1	1270	1270	100	100	1	1273	1273	0	2383	6176
1824	AT1G20730.1	AL1G33240.t1	0.119338	0.0781736	1.52658	NG	79.7	204	256	51	1	1	217	84.8	1	256	257	99.6	99.6	1	255	257	9.43e-142	397	1021
1825	AT1G20735.1	AL1G33230.t1	0.140682	0.110577	1.27225	NG	76.4	304	398	89	3	5	336	84.4	1	397	397	100	100	1	394	394	1.51e-214	593	1529
1826	AT1G20740.1	AL1G33720.t1	0.16157	0.16979	0.95159	NG	71	193	272	69	4	10	215	79	1	267	267	100	100	1	267	267	1.89e-125	357	916
1827	AT1G20760.1	AL1G33750.t1	0.0203317	0.0897203	0.226612	NG	89.3	911	1020	87	4	22	922	90.4	1	1020	1020	100	100	1	998	998	0	1595	4129
1828	AT1G20770.1	AL1G33760.t1	0.0388086	0.201155	0.192929	NG	91.7	198	216	18	0	0	207	95.8	1	216	216	100	100	1	216	216	2.16e-136	380	977
1829	AT1G20795.1	AL1G33790.t1	0.134243	0.217464	0.61731	NG	70.9	295	416	102	7	19	332	79.8	5	416	419	98.3	98.3	3	403	561	1.45e-196	555	1430
1830	AT1G20803.1	AL1G33800.t1	0.0775415	0.117668	0.658987	NG	79.3	146	184	32	2	6	158	85.9	1	184	184	100	100	1	178	178	1.09e-96	277	709
1831	AT1G20810.1	AL1G33810.t1	0.0255145	0.165024	0.154611	NG	93.5	216	231	13	1	2	220	95.2	1	231	233	99.1	99.1	1	229	230	1.8e-154	427	1099
1832	AT1G20816.1	AL1G33820.t1	0.0179521	0.100429	0.178755	NG	95.8	161	168	7	0	0	166	98.8	1	168	168	100	100	1	168	168	4.9e-123	343	879
1833	AT1G20823.1	AL1G33830.t1	0.0254947	0.219887	0.115944	NG	94.9	188	198	10	0	0	190	96	1	198	198	100	100	1	198	198	5.89e-132	368	944
1834	AT1G20830.2	AL1G33850.t1	0.0145498	0.135062	0.107727	NG	96.7	232	240	8	0	0	237	98.8	12	251	251	95.6	95.6	1	240	240	3.27e-164	453	1166
1835	AT1G20840.1	AL1G33860.t1	0.00752559	0.206232	0.0364909	NG	98.1	723	737	11	2	3	728	98.8	1	735	735	100	100	1	736	736	0	1392	3604
1836	AT1G20850.1	AL1G33870.t1	0.00847051	0.19127	0.0442857	NG	98	350	357	7	0	0	353	98.9	1	357	357	100	100	1	357	357	5e-258	700	1806
1837	AT1G20860.1	AL1G33880.t1	0.023256	0.172569	0.134763	NG	94.4	506	536	27	2	3	517	96.5	1	533	535	99.6	99.6	1	536	537	0	980	2534
1838	AT1G20870.1	AL1G33890.t1	0.0458108	0.213575	0.214496	NG	90.3	421	466	43	2	2	439	94.2	1	464	464	100	100	1	466	466	5.19e-301	818	2112
1839	AT1G20880.1	AL1G33900.t1	0.0403573	0.114511	0.352431	NG	92	253	275	22	0	0	259	94.2	1	275	275	100	100	1	275	275	9.68e-192	525	1353
1840	AT1G20890.1	AL1G33910.t1	0.0385969	0.214947	0.179565	NG	91.9	182	198	16	0	0	190	96	1	198	198	100	100	1	198	198	4.64e-129	360	925
1841	AT1G20900.1	AL1G33920.t1	0.00436334	0.134618	0.0324128	NG	96.2	303	315	9	1	3	303	96.2	1	312	312	100	100	1	315	315	5.13e-181	501	1291
1842	AT1G20910.1	AL1G33930.t1	0.0324826	0.0914579	0.355164	NG	92	370	402	28	2	4	382	95	1	399	399	100	100	1	401	401	1.6e-262	715	1845
1843	AT1G20920.1	AL3G20830.t1	0.0953329	0.344656	0.276603	NG	77.9	689	884	134	11	61	747	84.5	286	1167	1167	75.6	75.6	137	961	961	0	1258	3255
1844	AT1G20925.1	AL1G33950.t1	0.0104943	0.101711	0.103177	NG	97.7	378	387	9	0	0	380	98.2	87	473	473	81.8	81.8	1	387	387	3.35e-266	727	1876
1845	AT1G20930.1	AL1G33960.t1	0.00274143	0.143695	0.0190781	NG	99.4	314	316	2	0	0	315	99.7	1	316	316	100	100	1	316	316	1.75e-235	639	1649
1846	AT1G20940.1	AL1G33970.t1	0.0782876	0.176414	0.443773	NG	77.3	310	401	54	3	37	324	80.8	15	415	415	96.6	96.6	2	365	365	5.47e-217	599	1544
1847	AT1G20960.1	AL4G40630.t1	0.0874063	0.574002	0.152275	NG	83.4	1813	2175	353	5	9	1977	90.9	1	2172	2172	100	100	1	2169	2169	0	3542	9185
1848	AT1G20970.1	AL1G34040.t1	0.038613	0.112848	0.34217	NG	77.8	1069	1374	114	6	191	1102	80.2	1	1365	1365	100	100	1	1192	1192	0	1657	4290
1849	AT1G20980.1	AL2G36720.t1	0.138971	0.669526	0.207566	NG	70.3	743	1057	271	21	43	846	80	1	1036	1036	100	100	1	1035	1035	0	1335	3454
1850	AT1G20990.1	AL1G34060.t1	0.0241422	0.203325	0.118737	NG	93.2	301	323	19	1	3	308	95.4	1	320	320	100	100	1	323	323	9.61e-197	542	1396
1851	AT1G21000.1	AL1G34070.t1	0.0114902	0.0652768	0.176022	NG	98	242	247	5	0	0	244	98.8	1	247	247	100	100	1	247	247	3.15e-183	501	1291
1852	AT1G21010.1	AL1G34080.t1	0.0208238	0.181179	0.114935	NG	93.4	197	211	11	1	3	200	94.8	1	211	211	100	100	1	208	208	4.35e-126	354	908
1853	AT1G21050.1	AL1G34090.t1	0.0199734	0.231178	0.0863986	NG	93.5	230	246	15	1	1	236	95.9	1	246	246	100	100	1	245	245	3.01e-153	426	1094
1854	AT1G21060.1	AL1G34100.t1	0.0318231	0.12263	0.259505	NG	93.3	472	506	31	3	3	481	95.1	13	516	518	97.3	97.3	1	505	506	0	896	2315
1855	AT1G21065.1	AL1G34110.t1	0.0184608	0.124031	0.148841	NG	95.4	209	219	9	1	1	213	97.3	1	218	218	100	100	1	219	219	1.49e-151	419	1077
1856	AT1G21070.1	AL1G34120.t1	0.00497342	0.153988	0.0322974	NG	98.9	345	349	4	0	0	345	98.9	1	349	349	100	100	1	349	349	2.71e-242	659	1701
1857	AT1G21080.1	AL1G34130.t1	0.0121744	0.0976534	0.12467	NG	97.2	381	392	11	0	0	384	98	1	392	392	100	100	1	392	392	2.43e-269	731	1888
1858	AT1G21090.1	AL1G34140.t1	0.0343212	0.105795	0.324414	NG	94.7	213	225	12	0	0	220	97.8	13	237	243	92.6	92.6	5	229	234	1.72e-151	421	1081
1859	AT1G21120.1	AL1G34170.t1	0.0170073	0.244152	0.0696587	NG	96.3	360	374	14	0	0	365	97.6	1	374	374	100	100	1	374	374	1.83e-264	717	1852
1860	AT1G21130.1	AL1G34180.t1	0.0152392	0.209401	0.0727751	NG	96.5	361	374	13	0	0	367	98.1	1	374	374	100	100	1	374	374	9.48e-267	723	1867
1861	AT1G21140.1	AL1G34200.t1	0.00438279	0.164288	0.0266775	NG	99	199	201	2	0	0	200	99.5	1	201	201	100	100	1	201	201	2.58e-132	369	947
1862	AT1G21150.1	AL1G34210.t1	0.0472527	0.0843281	0.560344	NG	89.6	319	356	37	0	0	333	93.5	36	391	391	91	91	2	357	357	8.85e-208	574	1480
1863	AT1G21160.1	AL1G34220.t1	0.0635227	0.126198	0.503359	NG	76.5	841	1100	143	5	116	902	82	1	1093	1093	100	100	1	991	991	0	1469	3803
1864	AT1G21170.2	AL2G36970.t1	0.105897	0.587116	0.180368	NG	80.2	885	1103	199	7	19	960	87	2	1100	1100	99.9	99.9	3	1090	1090	0	1578	4086
1865	AT1G21190.1	AL1G34240.t1	0.00457968	0.104163	0.0439665	NG	99	96	97	1	0	0	97	100	1	97	98	99	99	1	97	99	5.69e-64	188	477
1866	AT1G21200.1	AL1G34250.t1	0.0182476	0.196544	0.0928425	NG	89.6	398	444	43	2	3	406	91.4	1	444	444	100	100	1	441	441	1.29e-255	701	1809
1867	AT1G21210.1	AL1G34330.t1	0.205112	0.479525	0.42774	NG	65.9	498	756	226	16	32	568	75.1	7	739	739	99.2	99.2	8	754	754	0	908	2346
1868	AT1G21280.1	AL1G34370.t1	0.0427054	0.129869	0.328834	NG	90.3	215	238	21	1	2	225	94.5	1	238	238	100	100	1	236	236	6.52e-162	447	1149
1869	AT1G21320.2	AL1G34410.t3	0.0950076	0.108174	0.878286	NG	66.4	168	253	35	2	50	179	70.8	1	253	254	99.6	99.6	1	203	241	8.73e-110	316	809
1870	AT1G21326.1	AL1G34420.t1	0.0685727	0.168209	0.407662	NG	77.6	159	205	39	2	7	166	81	1	205	240	85.4	85.4	1	198	204	1.4e-96	280	717
1871	AT1G21340.1	AL1G34440.t1	0.035087	0.159138	0.220482	NG	92	241	262	20	1	1	249	95	1	261	261	100	100	3	264	264	2.24e-177	488	1256
1872	AT1G21350.3	AL1G34450.t1	0.0435617	0.147937	0.294462	NG	85	216	254	37	1	1	223	87.8	1	253	253	100	100	1	254	254	3.87e-153	426	1095
1873	AT1G21360.1	AL1G34460.t1	0.030357	0.123216	0.246373	NG	93	199	214	15	0	0	208	97.2	11	224	224	95.5	95.5	3	216	216	3.38e-142	395	1016
1874	AT1G21370.1	AL1G34470.t1	0.0292573	0.103978	0.28138	NG	93.7	281	300	19	0	0	292	97.3	42	341	343	87.5	87.5	1	300	302	1.73e-216	592	1526
1875	AT1G21380.1	AL1G34480.t1	0.0142137	0.106953	0.132897	NG	95.5	484	507	23	0	0	491	96.8	1	507	507	100	100	1	507	507	0	936	2419
1876	AT1G21390.1	AL1G34490.t1	0.029913	0.136469	0.219193	NG	88.8	221	249	24	3	4	227	91.2	1	249	249	100	100	1	245	245	3.01e-140	393	1009
1877	AT1G21395.1	AL1G34500.t1	0.0427936	0.0889016	0.481359	NG	88.9	64	72	6	1	2	66	91.7	5	74	74	94.6	94.6	4	75	75	5.55e-42	130	328
1878	AT1G21400.1	AL1G34510.t1	0.0180774	0.212716	0.0849837	NG	95.8	454	474	18	2	2	460	97	1	473	473	100	100	1	473	473	0	900	2325
1879	AT1G21410.1	AL1G34520.t1	0.0102523	0.131113	0.078194	NG	96.4	348	361	13	0	0	349	96.7	1	361	361	100	100	1	361	361	2.4e-163	461	1185
1880	AT1G21430.1	AL1G34540.t1	0.0306991	0.126263	0.243136	NG	93.7	355	379	24	0	0	364	96	1	379	392	96.7	96.7	1	379	510	7.99e-260	712	1838
1881	AT1G21440.1	AL1G34550.t1	0.0132673	0.19756	0.0671556	NG	97.3	328	337	9	0	0	333	98.8	1	337	337	100	100	1	337	337	6.06e-233	635	1637
1882	AT1G21450.1	AL1G34560.t2	0.00945771	0.20836	0.0453912	NG	97.8	581	594	13	0	0	591	99.5	1	594	594	100	100	1	594	594	0	1138	2944
1883	AT1G21460.1	AL1G34570.t2	0.0106637	0.145106	0.0734891	NG	94	233	248	15	0	0	237	95.6	1	248	248	100	100	1	248	248	2.33e-165	456	1174
1884	AT1G21475.1	AL1G34610.t1	0.25415	0.427072	0.595098	NG	58.6	99	169	66	2	4	126	74.6	14	179	182	91.2	91.2	10	177	181	1.14e-63	194	492
1885	AT1G21480.1	AL1G34590.t1	0.00849091	0.0755482	0.112391	NG	98.1	454	463	9	0	0	461	99.6	1	463	463	100	100	1	463	463	0	940	2430
1886	AT1G21500.1	AL1G34640.t1	0.0146497	0.0505502	0.289806	NG	96.1	122	127	5	0	0	123	96.9	1	127	127	100	100	1	127	127	2.73e-64	191	485
1887	AT1G21510.1	AL1G34650.t1	0.0569055	0.167396	0.339945	NG	86.5	283	327	41	1	3	299	91.4	1	324	324	100	100	1	327	327	1.64e-176	491	1264
1888	AT1G21520.1	AL1G34660.t1	0.0541794	0.263936	0.205274	NG	93.8	61	65	4	0	0	61	93.8	1	65	67	97	97	1	65	67	4.37e-38	120	301
1889	AT1G21530.1	AL1G34690.t1	0.0518371	0.616019	0.0841486	NG	89.5	493	551	51	3	7	518	94	1	546	548	99.6	99.6	1	549	551	0	999	2583
1890	AT1G21550.1	AL1G34700.t1	0.0381261	0.127663	0.298646	NG	79.7	114	143	23	1	6	119	83.2	14	156	156	91.7	91.7	1	137	137	5.48e-76	222	566
1891	AT1G21560.2	AL1G34710.t1	0.057308	0.109881	0.521546	NG	83.5	340	407	44	5	23	360	88.5	1	398	400	99.5	99.5	1	393	395	4.54e-224	617	1592
1892	AT1G21580.1	AL1G34720.t1	0.0379893	0.0842334	0.451001	NG	86.9	1910	2199	225	17	64	1969	89.5	1	2167	2167	100	100	1	2167	2167	0	3332	8639
1893	AT1G21600.1	AL1G34740.t1	0.017336	0.190945	0.0907908	NG	92.7	305	329	24	0	0	311	94.5	1	329	329	100	100	1	329	329	2.02e-211	580	1494
1894	AT1G21610.3	AL1G34750.t1	0.0333176	0.0991406	0.336064	NG	90.1	627	696	50	5	19	635	91.2	1	686	686	100	100	1	687	687	0	1119	2894
1895	AT1G21630.2	AL1G34770.t1	0.0215172	0.102683	0.20955	NG	91.8	1155	1258	58	9	45	1175	93.4	1	1248	1248	100	100	1	1223	1223	0	1844	4776
1896	AT1G21640.2	AL1G34780.t1	0.0159014	0.0961269	0.165421	NG	95	950	1000	34	2	16	964	96.4	1	1000	1000	100	100	37	1020	1020	0	1865	4830
1897	AT1G21650.1	AL1G34790.t2	0.00913464	0.101046	0.0904006	NG	96.3	1023	1062	29	1	10	1033	97.3	1	1052	1052	100	100	1	1062	1062	0	1993	5164
1898	AT1G21651.1	AL1G34800.t1	0.0391786	0.100737	0.388921	NG	91.2	740	811	69	2	2	770	94.9	1	810	812	99.8	99.8	1	810	812	0	1431	3703
1899	AT1G21660.1	AL1G34820.t1	0.03039	0.111466	0.272639	NG	92	484	526	37	4	5	493	93.7	1	524	524	100	100	1	523	523	1.03e-305	862	2228
1900	AT1G21670.1	AL1G34830.t1	0.0309357	0.162945	0.189854	NG	92.5	651	704	53	0	0	673	95.6	1	704	704	100	100	1	704	704	0	1335	3454
1901	AT1G21680.1	AL1G34840.t1	0.0261611	0.197741	0.1323	NG	94.9	671	707	36	0	0	689	97.5	1	707	707	100	100	1	707	707	0	1394	3609
1902	AT1G21690.1	AL1G34850.t1	0.00643204	0.0803249	0.0800753	NG	98.8	336	340	4	0	0	338	99.4	1	340	340	100	100	1	340	340	1.29e-240	654	1688
1903	AT1G21695.1	AL1G34860.t1	0.0382866	0.140054	0.27337	NG	76.7	168	219	37	6	14	173	79	1	218	218	100	100	1	206	206	9.67e-99	285	729
1904	AT1G21700.1	AL1G34870.t2	0.0160312	0.0935705	0.171328	NG	94	766	815	33	7	16	773	94.8	1	808	808	100	100	1	806	806	0	1370	3546
1905	AT1G21710.1	AL1G34880.t1	0.0321713	0.170122	0.189107	NG	93.7	344	367	22	1	1	353	96.2	1	366	366	100	100	1	367	367	1.59e-252	687	1772
1906	AT1G21720.1	AL1G34890.t1	0.00212961	0.122318	0.0174104	NG	100	205	205	0	0	0	205	100	1	205	205	100	100	1	205	205	4.88e-148	409	1051
1907	AT1G21722.1	AL1G34900.t1	0.0492798	0.19827	0.248549	NG	92	208	226	17	1	1	215	95.1	1	225	234	96.2	96.2	1	226	229	6.51e-125	353	905
1908	AT1G21730.1	AL1G34920.t1	0.015349	0.112921	0.135927	NG	94.9	846	891	45	0	0	856	96.1	1	891	891	100	100	1	891	891	0	1540	3987
1909	AT1G21740.1	AL2G37700.t1	0.156238	0.842144	0.185524	NG	66.4	634	955	234	21	87	711	74.5	1	947	954	99.3	99.3	1	876	881	0	983	2541
1910	AT1G21750.1	AL1G34950.t1	0.0173045	0.0923224	0.187435	NG	96.4	484	502	18	0	0	494	98.4	1	502	502	100	100	1	502	502	0	952	2461
1911	AT1G21760.1	AL1G34960.t1	0.0189045	0.118926	0.15896	NG	95.7	244	255	11	0	0	253	99.2	75	329	329	77.5	77.5	1	255	255	6.77e-183	504	1299
1912	AT1G21770.1	AL1G34970.t1	0.0399367	0.0984403	0.405694	NG	91.1	102	112	10	0	0	106	94.6	1	112	112	100	100	1	112	112	2.65e-73	213	541
1913	AT1G21780.1	AL1G34980.t1	0.00661942	0.191121	0.0346347	NG	98.5	322	327	5	0	0	325	99.4	1	327	327	100	100	1	327	327	9.45e-241	654	1686
1914	AT1G21790.1	AL1G34990.t1	0.0167908	0.204043	0.0822906	NG	96.2	278	289	11	0	0	284	98.3	1	289	289	100	100	1	289	289	2.59e-203	556	1432
1915	AT1G21810.1	AL1G35010.t1	0.0629466	0.145418	0.432866	NG	77	538	699	88	2	73	572	81.8	2	630	630	99.8	99.8	1	696	696	3.09e-255	718	1853
1916	AT1G21830.1	AL1G35020.t1	0.00843413	0.0842304	0.100132	NG	91.8	190	207	16	1	1	192	92.8	1	207	207	100	100	1	206	206	1.87e-130	365	936
1917	AT1G21835.1	AL1G35030.t1	0.106975	0.130296	0.821016	NG	81.3	74	91	17	0	0	81	89	1	91	91	100	100	1	91	91	9.58e-55	164	415
1918	AT1G21840.1	AL1G35040.t1	0.0250229	0.234297	0.1068	NG	94.6	228	241	13	0	0	234	97.1	1	241	241	100	100	1	241	241	7.89e-165	454	1169
1919	AT1G21850.1	AL1G35050.t1	0.0300967	0.100553	0.299311	NG	93.7	507	541	34	0	0	521	96.3	1	541	552	98	98	1	541	544	0	1060	2740
1920	AT1G21866.1	AL1G35060.t1	0.0946253	0.200615	0.471675	NG	83.7	77	92	15	0	0	83	90.2	1	92	94	97.9	97.9	1	92	94	1.19e-54	164	415
1921	AT1G21870.1	AL1G35070.t1	0.0192792	0.160802	0.119894	NG	95.9	328	342	14	0	0	336	98.2	1	342	342	100	100	1	342	342	1.51e-240	654	1688
1922	AT1G21880.2	AL1G35080.t1	0.0244695	0.119048	0.205544	NG	95.5	399	418	18	1	1	409	97.8	1	417	417	100	100	1	418	418	8.34e-283	768	1982
1923	AT1G21890.1	AL1G35090.t1	0.0186282	0.139735	0.13331	NG	94.1	364	387	18	2	5	370	95.6	4	390	390	99.2	99.2	9	390	390	1e-244	669	1726
1924	AT1G21900.1	AL1G35100.t1	0.025442	0.169502	0.150098	NG	94.5	205	217	12	0	0	209	96.3	1	217	217	100	100	1	217	217	3.5e-147	408	1048
1925	AT1G21910.1	AL1G35110.t1	0.0308056	0.119352	0.258106	NG	90.9	199	219	16	1	4	206	94.1	17	231	231	93.1	93.1	1	219	219	2.49e-119	338	867
1926	AT1G21920.1	AL1G35120.t1	0.0229052	0.145106	0.157851	NG	91.5	390	426	28	1	8	401	94.1	1	418	418	100	100	1	426	426	7.47e-126	370	950
1927	AT1G21925.1	AL1G35260.t1	0.119912	0.215239	0.557108	NG	72.7	72	99	23	2	4	84	84.8	1	99	101	98	98	1	95	96	7.39e-49	150	378
1928	AT1G21930.1	AL1G35150.t1	0.00903116	0.127543	0.0708089	NG	100	84	84	0	0	0	84	100	1	84	99	84.8	84.8	1	84	98	8.5e-57	170	430
1929	AT1G21940.1	AL1G35300.t1	0.0437014	0.183094	0.238682	NG	91.9	114	124	10	0	0	119	96	59	182	184	67.4	67.4	1	124	126	6.86e-77	225	574
1930	AT1G21950.1	AL1G35320.t1	0.0984395	0.163478	0.602156	NG	83.2	109	131	22	0	0	114	87	1	131	131	100	100	1	131	131	1.19e-69	205	521
1931	AT1G21960.1	AL1G35170.t1	0.0763015	0.166639	0.457884	NG	75.6	155	205	28	4	22	164	80	5	205	205	98	98	37	223	223	4.45e-100	288	738
1932	AT1G21970.1	AL1G35370.t1	0.030299	0.131473	0.230457	NG	92.1	220	239	18	1	1	222	92.9	1	239	239	100	100	1	238	238	4.73e-142	397	1019
1933	AT1G21980.1	AL1G35380.t1	0.010313	0.108349	0.0951836	NG	98.3	702	714	12	0	0	710	99.4	40	753	753	94.8	94.8	41	754	754	0	1090	2820
1934	AT1G21990.1	AL1G53180.t1	0.0850768	0.0790904	1.07569	NG	83.4	391	469	73	3	5	419	89.3	1	466	466	100	100	1	467	467	1.14e-291	794	2051
1935	AT1G22000.1	AL1G38800.t1	0.0879719	0.139653	0.629934	NG	81	372	459	70	3	17	398	86.7	19	461	466	95.1	95.1	253	710	711	1.34e-255	712	1839
1936	AT1G22010.1	AL1G35410.t1	0.137888	0.0875341	1.57525	NG	73.2	120	164	41	1	3	135	82.3	1	164	164	100	100	1	161	161	1.29e-79	233	593
1937	AT1G22015.1	AL1G35420.t1	0.0216974	0.122896	0.176551	NG	95.2	380	399	18	1	1	389	97.5	1	399	399	100	100	1	398	398	2.38e-277	752	1942
1938	AT1G22020.1	AL1G35430.t1	0.01316	0.120197	0.109487	NG	96.3	578	600	18	2	4	585	97.5	1	600	600	100	100	1	596	596	0	1124	2908
1939	AT1G22030.1	AL1G35440.t1	0.00131616	0.212956	0.00618044	NG	97.1	329	339	1	3	9	329	97.1	1	334	334	100	100	1	335	335	2.76e-214	587	1514
1940	AT1G22040.1	AL1G35460.t1	0.0242024	0.134361	0.18013	NG	93.7	449	479	27	1	3	453	94.6	1	476	476	100	100	1	479	479	0	880	2273
1941	AT1G22060.1	AL1G35490.t1	0.0279486	0.0927775	0.301244	NG	93.1	1863	2001	137	1	1	1916	95.8	1	2000	2000	100	100	1	2001	2001	0	3429	8891
1942	AT1G22065.1	AL1G35500.t1	0.0371495	0.178121	0.208564	NG	90.5	67	74	6	1	1	70	94.6	1	73	73	100	100	1	74	74	5.17e-42	130	328
1943	AT1G22070.1	AL1G35510.t1	0.0193554	0.0923042	0.209691	NG	92.7	356	384	26	2	2	364	94.8	4	385	385	99.2	99.2	1	384	384	1.64e-238	653	1684
1944	AT1G22090.1	AL1G35530.t1	0.0827458	0.258791	0.31974	NG	84.6	286	338	44	3	8	302	89.3	1	330	330	100	100	1	338	338	1.04e-204	563	1451
1945	AT1G22100.1	AL1G35540.t1	0.0225483	0.120458	0.187187	NG	95	420	442	22	0	0	434	98.2	1	442	442	100	100	1	442	442	3.11e-305	842	2174
1946	AT1G22110.1	AL1G35550.t1	0.028664	0.12009	0.238688	NG	90.3	251	278	19	2	8	256	92.1	14	283	283	95.4	95.4	1	278	278	1.72e-158	442	1136
1947	AT1G22120.1	AL1G35560.t2	0.073586	0.170161	0.43245	NG	77.2	370	479	83	7	26	398	83.1	1	463	463	100	100	1	469	469	2.28e-242	669	1727
1948	AT1G22130.1	AL1G35570.t1	0.0206287	0.12946	0.159344	NG	95.5	321	336	15	0	0	326	97	1	336	336	100	100	1	336	336	3.32e-225	615	1586
1949	AT1G22140.1	AL1G35580.t1	0.0240093	0.115479	0.20791	NG	94.5	69	73	4	0	0	70	95.9	1	73	73	100	100	1	73	73	4.62e-47	143	361
1950	AT1G22160.1	AL1G35610.t1	0.0215851	0.130746	0.165092	NG	92.6	137	148	7	1	4	140	94.6	1	148	148	100	100	1	144	144	3.92e-89	255	652
1951	AT1G22170.1	AL1G35620.t1	0.0118392	0.144393	0.0819927	NG	95.8	321	335	9	2	5	327	97.6	1	335	335	100	100	1	330	330	1.26e-225	616	1588
1952	AT1G22180.2	AL1G35630.t1	0.0268536	0.192976	0.139155	NG	94.3	296	314	18	0	0	303	96.5	1	314	315	99.7	99.7	1	314	317	2.21e-213	583	1504
1953	AT1G22190.1	AL1G35640.t1	0.0368833	0.165042	0.223478	NG	87.2	238	273	24	2	11	243	89	1	262	262	100	100	1	273	273	1.15e-154	431	1108
1954	AT1G22200.1	AL1G35650.t1	0.00331642	0.139485	0.0237761	NG	99.2	384	387	3	0	0	384	99.2	1	387	387	100	100	1	387	387	1.07e-290	785	2027
1955	AT1G22210.1	AL1G35660.t1	0.0204203	0.159802	0.127785	NG	95.9	307	320	13	0	0	313	97.8	1	320	321	99.7	99.7	1	320	330	1.39e-223	610	1573
1956	AT1G22220.1	AL1G35670.t1	0.0566491	0.317219	0.17858	NG	83.1	265	319	49	3	5	277	86.8	1	315	315	100	100	1	318	318	1.25e-171	478	1230
1957	AT1G22230.1	AL1G35680.t1	0.0219612	0.186638	0.117667	NG	89.7	287	320	27	2	6	289	90.3	1	315	315	100	100	1	319	319	7.77e-180	499	1284
1958	AT1G22240.1	AL1G35692.t1	0.0273736	0.169627	0.161375	NG	90.8	481	530	31	5	18	494	93.2	1	516	516	100	100	1	526	526	0	931	2406
1959	AT1G22250.1	AL1G35710.t1	0.0458766	0.118752	0.386323	NG	81.8	153	187	32	2	2	163	87.2	17	201	201	92	92	1	187	187	5.5e-101	289	740
1960	AT1G22260.1	AL1G35730.t1	0.0578061	0.167946	0.344195	NG	86.5	759	877	113	2	5	791	90.2	1	872	872	100	100	1	877	877	0	1155	2987
1961	AT1G22270.1	AL1G35720.t1	0.00697733	0.101822	0.0685246	NG	98.4	123	125	2	0	0	125	100	1	125	125	100	100	1	125	125	9.45e-89	253	645
1962	AT1G22280.1	AL1G35740.t1	0.00154531	0.165554	0.00933419	NG	99.6	281	282	1	0	0	281	99.6	1	282	282	100	100	1	282	282	6.13e-203	554	1428
1963	AT1G22300.1	AL1G35750.t1	0.0101813	0.136141	0.0747849	NG	97.6	249	255	6	0	0	252	98.8	1	255	255	100	100	1	255	255	3.57e-168	464	1194
1964	AT1G22310.2	AL1G35760.t1	0.0554098	0.174976	0.31667	NG	85.6	447	522	57	6	18	470	90	1	516	525	98.3	98.3	1	510	512	6.89e-280	769	1985
1965	AT1G22330.1	AL1G35780.t1	0.0139172	0.126797	0.109759	NG	95.6	280	293	11	2	2	281	95.9	1	292	292	100	100	1	292	292	1.82e-154	432	1112
1966	AT1G22340.1	AL1G35790.t1	0.0361599	0.259783	0.139193	NG	92.4	450	487	37	0	0	466	95.7	1	487	488	99.8	99.8	1	487	489	0	926	2393
1967	AT1G22360.1	AL1G35830.t1	0.0249954	0.231053	0.10818	NG	94.8	457	482	25	0	0	465	96.5	1	482	482	100	100	1	482	482	0	931	2405
1968	AT1G22380.1	AL1G35860.t1	0.0456163	0.170602	0.267385	NG	90.8	443	488	45	0	0	459	94.1	1	488	489	99.8	99.8	1	488	492	0	915	2365
1969	AT1G22400.1	AL1G35870.t1	0.0259685	0.214351	0.12115	NG	94.4	459	486	27	0	0	476	97.9	1	486	490	99.2	99.2	1	486	487	0	946	2444
1970	AT1G22410.1	AL1G35880.t1	0.0104191	0.12678	0.0821828	NG	97.5	515	528	13	0	0	520	98.5	1	528	528	100	100	1	528	528	0	1020	2637
1971	AT1G22420.1	AL1G35890.t1	0.157044	0.210627	0.745601	NG	63.5	190	299	86	4	23	209	69.9	17	298	481	58.6	58.6	1	293	455	1.52e-81	259	663
1972	AT1G22430.1	AL1G35950.t1	0.0185947	0.194477	0.0956138	NG	96.4	375	389	14	0	0	381	97.9	1	389	389	100	100	1	389	389	7.12e-281	760	1963
1973	AT1G22440.1	AL1G35960.t1	0.0339579	0.200944	0.168992	NG	91.3	355	389	32	1	2	370	95.1	1	387	387	100	100	1	389	389	1.49e-261	711	1836
1974	AT1G22450.1	AL1G35970.t1	0.0311785	0.110906	0.281126	NG	90.2	174	193	18	1	1	176	91.2	1	192	192	100	100	1	193	193	2.14e-83	244	624
1975	AT1G22460.1	AL1G35980.t1	0.0315053	0.208516	0.151093	NG	93.3	530	568	35	3	3	547	96.3	1	566	566	100	100	1	567	567	0	1032	2668
1976	AT1G22470.1	AL1G35990.t1	0.0270416	0.168979	0.16003	NG	91.2	134	147	13	0	0	139	94.6	1	147	147	100	100	1	147	147	3.12e-68	202	515
1977	AT1G22480.1	AL1G36000.t1	0.0417128	0.105658	0.39479	NG	89.2	157	176	17	2	2	161	91.5	1	175	175	100	100	1	175	175	7.48e-101	287	735
1978	AT1G22490.1	AL1G36010.t1	0.0390421	0.165245	0.236268	NG	87.6	269	307	34	1	4	280	91.2	1	303	305	99.3	99.3	1	307	313	5.14e-181	501	1290
1979	AT1G22500.1	AL1G36040.t1	0.0502971	0.160622	0.313139	NG	88	338	384	43	3	3	355	92.4	1	382	382	100	100	1	383	383	1.44e-247	676	1743
1980	AT1G22520.1	AL1G36060.t1	0.0228559	0.0847303	0.269749	NG	95	95	100	5	0	0	99	99	1	100	100	100	100	1	100	100	5.9e-60	178	451
1981	AT1G22530.1	AL1G36070.t1	0.0232057	0.173681	0.133611	NG	83.3	588	706	67	9	51	594	84.1	1	684	684	100	100	1	677	677	2.69e-302	839	2167
1982	AT1G22540.1	AL1G36080.t1	0.0154592	0.144837	0.106735	NG	96.1	540	562	18	1	4	552	98.2	1	558	558	100	100	1	562	562	0	1053	2724
1983	AT1G22550.1	AL1G36100.t1	0.0967424	0.598949	0.16152	NG	79.7	458	575	98	4	19	496	86.3	1	562	565	99.5	99.5	1	569	570	0	885	2288
1984	AT1G22570.1	AL1G36090.t1	0.108509	0.524642	0.206824	NG	79.6	454	570	104	4	12	503	88.2	1	566	566	100	100	1	562	562	0	897	2318
1985	AT1G22590.2	AL1G36120.t1	0.0374769	0.133881	0.279926	NG	92.1	151	164	13	0	0	159	97	1	164	164	100	100	1	164	164	2.94e-104	295	755
1986	AT1G22600.1	AL1G36130.t1	0.0731823	0.197469	0.370602	NG	74.1	286	386	94	3	6	305	79	1	386	386	100	100	1	380	380	2.09e-175	493	1269
1987	AT1G22610.1	AL8G20390.t1	0.40733	NA	NA	NG	51.2	539	1053	470	13	44	721	68.5	3	1030	1030	99.8	99.8	6	1039	1039	0	1021	2641
1988	AT1G22620.1	AL1G36150.t1	0.00877271	0.0783175	0.112015	NG	98.1	896	913	16	1	1	904	99	1	913	913	100	100	1	912	912	0	1783	4618
1989	AT1G22630.1	AL1G36160.t1	0.0156934	0.0426015	0.368376	NG	96.4	107	111	4	0	0	109	98.2	1	111	111	100	100	1	111	111	1.17e-80	231	589
1990	AT1G22640.1	AL1G36170.t1	0.033621	0.148053	0.227087	NG	93.1	241	259	16	2	2	249	96.1	1	258	258	100	100	1	258	258	3.65e-183	502	1293
1991	AT1G22660.1	AL1G36200.t1	0.0423573	0.126043	0.336055	NG	91.3	553	606	51	2	2	575	94.9	1	606	606	100	100	1	604	604	0	1070	2768
1992	AT1G22670.1	AL1G36210.t1	0.0503717	0.0969033	0.519814	NG	87.2	375	430	45	3	10	392	91.2	1	423	423	100	100	1	427	427	1.84e-253	694	1791
1993	AT1G22680.1	AL1G36220.t1	0.0576601	0.105157	0.548323	NG	85.6	160	187	21	4	6	166	88.8	1	184	186	98.9	98.9	1	184	185	1.21e-102	293	749
1994	AT1G22690.1	AL1G36230.t1	0.0147394	0.0895331	0.164625	NG	87	107	123	13	2	3	109	88.6	1	120	120	100	100	1	123	123	5.32e-57	172	436
1995	AT1G22700.2	AL1G36240.t1	0.0121885	0.181123	0.0672942	NG	97.6	285	292	7	0	0	290	99.3	6	297	297	98.3	98.3	1	292	292	1.82e-199	546	1408
1996	AT1G22710.1	AL1G36250.t1	0.00920407	0.121371	0.075834	NG	98.1	503	513	10	0	0	511	99.6	1	513	513	100	100	1	513	513	0	1011	2613
1997	AT1G22730.1	AL1G36270.t1	0.0127284	0.11709	0.108706	NG	97.1	674	694	19	1	1	683	98.4	1	694	694	100	100	1	693	693	0	1291	3342
1998	AT1G22740.1	AL1G36280.t1	0.0246579	0.151439	0.162824	NG	94.2	194	206	10	1	2	199	96.6	1	204	204	100	100	1	206	206	3.02e-142	394	1013
1999	AT1G22750.2	AL1G36290.t2	0.0264724	0.0774165	0.341948	NG	94.8	235	248	13	0	0	242	97.6	1	248	248	100	100	1	248	248	4.51e-163	451	1159
[truncated: 19,928 more rows]

## Sheet: 2. All M2a-M1a results
gene	isoform	M2a_vs_M1a_LRT	M2a_vs_M1a_pval	M2a_vs_M1a_padj
AT1G49240	AT1G49240.1	0.005	0.997623	1
AT2G37620	AT2G37620.1	0.521	0.770726	1
AT2G37620	AT2G37620.2	-0.52	1	1
AT2G37620	AT2G37620.3	0	1	1
AT2G37620	AT2G37620.4	0.521	0.770726	1
AT2G42100	AT2G42100.1	14.814	6.07e-4	0.015248
AT3G12110	AT3G12110.1	0.001	0.999615	1
AT3G18780	AT3G18780.2	0.006	0.996865	1
AT3G18780	AT3G18780.3	0.005	0.997282	1
AT3G46520	AT3G46520.1	0	0.999999	1
AT3G46520	AT3G46520.2	0	0.999999	1
AT3G53750	AT3G53750.1	0.003	0.998287	1
AT3G53750	AT3G53750.2	0.003	0.998287	1
AT5G09810	AT5G09810.1	0.001	0.999715	1
AT1G12300	AT1G12300.1	6.312	0.042586	0.366342
AT1G12620	AT1G12620.1	0	1	1
AT1G12700	AT1G12700.1	0.268	0.874646	1
AT1G12700	AT1G12700.2	0.268	0.874646	1
AT1G12700	AT1G12700.3	0.268	0.874646	1
AT1G12775	AT1G12775.1	0	1	1
AT1G63320	AT1G63320.1	0	1	1
AT1G10630	AT1G10630.1	0.013	0.993552	1
AT1G10630	AT1G10630.2	0	1	1
AT1G23490	AT1G23490.1	0.134	0.935067	1
AT1G70490	AT1G70490.1	0.118	0.942775	1
AT1G70490	AT1G70490.2	0.118	0.942777	1
AT1G70490	AT1G70490.3	0	1	1
AT1G70490	AT1G70490.4	0.25	0.882449	1
AT1G70490	AT1G70490.5	0.118	0.942777	1
AT1G70490	AT1G70490.6	0	1	1
AT1G70490	AT1G70490.7	0	1	1
AT2G47170	AT2G47170.1	0	1	1
AT2G47170	AT2G47170.2	0	1	1
AT2G47170	AT2G47170.3	0	1	1
AT3G62290	AT3G62290.1	0	1	1
AT3G62290	AT3G62290.2	0	1	1
AT3G62290	AT3G62290.3	0	1	1
AT5G14670	AT5G14670.2	0	1	1
AT5G14670	AT5G14670.3	0	1	1
AT4G17240	AT4G17240.1	0	1	1
AT4G17240	AT4G17240.2	0	1	1
AT1G52430	AT1G52430.1	17.346	1.71e-4	0.005408
AT1G52430	AT1G52430.2	18.933	7.7e-5	0.002879
AT1G52450	AT1G52450.1	21.015	2.7e-5	0.001233
AT1G52450	AT1G52450.2	20.314	3.9e-5	0.001653
AT1G65110	AT1G65110.1	17	2.03e-4	0.006214
AT1G65110	AT1G65110.2	16.992	2.04e-4	0.006234
AT1G65120	AT1G65120.1	14.618	6.69e-4	0.016471
AT1G65120	AT1G65120.2	7.221	0.027033	0.268508
AT1G65130	AT1G65130.1	12.418	0.002011	0.039756
AT1G65130	AT1G65130.2	11.56	0.003088	0.054752
AT1G65130	AT1G65130.3	12.515	0.001916	0.038349
AT1G65130	AT1G65130.4	12.515	0.001916	0.038349
AT1G65130	AT1G65130.5	12.78	0.001678	0.034631
AT1G65200	AT1G65200.1	17.922	1.28e-4	0.004266
AT2G27630	AT2G27630.1	41.824	0	0
AT2G27650	AT2G27650.1	42.824	0	0
AT5G51530	AT5G51530.1	41.819	0	0
AT5G51530	AT5G51530.2	41.819	0	0
AT5G61940	AT5G61940.1	25.636	3e-6	1.95e-4
AT5G61940	AT5G61940.2	27.46	1e-6	7.5e-5
AT5G61940	AT5G61940.3	27.46	1e-6	7.5e-5
AT5G61940	AT5G61940.4	27.46	1e-6	7.5e-5
AT5G61950	AT5G61950.1	14.446	7.3e-4	0.017657
AT1G09200	AT1G09200.1	0.003	0.998681	1
AT1G19890	AT1G19890.1	0.144	0.930304	1
AT1G75600	AT1G75600.1	0	1	1
AT3G27360	AT3G27360.1	0.003	0.998691	1
AT4G40030	AT4G40030.1	0.003	0.998653	1
AT4G40030	AT4G40030.3	0.003	0.998653	1
AT4G40030	AT4G40030.4	0.003	0.998653	1
AT4G40040	AT4G40040.1	0.003	0.998664	1
AT4G40040	AT4G40040.2	0.003	0.998664	1
AT4G40040	AT4G40040.3	0.003	0.998664	1
AT5G10390	AT5G10390.1	0.003	0.998701	1
AT5G10400	AT5G10400.1	0.003	0.998748	1
AT5G10980	AT5G10980.1	0.003	0.998656	1
AT5G65360	AT5G65360.1	0.003	0.998724	1
AT1G30920	AT1G30920.1	39.166	0	0
AT1G30930	AT1G30930.1	17.736	1.41e-4	0.004621
AT1G31080	AT1G31080.1	29.41	0	0
AT1G31090	AT1G31090.1	5.115	0.077509	0.548248
AT1G67130	AT1G67130.1	34.815	0	0
AT5G42430	AT5G42430.1	56.836	0	0
AT1G20010	AT1G20010.1	0	1	1
AT1G75780	AT1G75780.1	0.005	0.997316	1
AT2G29550	AT2G29550.1	0.029	0.985769	1
AT4G20890	AT4G20890.1	0	1	1
AT5G12250	AT5G12250.1	0	1	1
AT5G23860	AT5G23860.1	0.005	0.997752	1
AT5G23860	AT5G23860.2	0.005	0.997752	1
AT5G44340	AT5G44340.1	0	1	1
AT5G62690	AT5G62690.1	0	1	1
AT5G62700	AT5G62700.1	-6.439	1	1
AT2G29310	AT2G29310.1	0	1	1
AT2G29320	AT2G29320.1	0	1	1
AT2G29320	AT2G29320.2	0	1	1
AT2G29330	AT2G29330.1	0	1	1
AT2G29340	AT2G29340.1	0	1	1
AT2G29340	AT2G29340.2	0	1	1
AT2G30670	AT2G30670.1	4.437	0.108771	0.688349
AT1G80660	AT1G80660.1	0	1	1
AT2G07560	AT2G07560.1	0	1	1
AT2G18960	AT2G18960.1	0.144	0.93054	1
AT2G24520	AT2G24520.1	0	1	1
AT2G24520	AT2G24520.3	0	1	1
AT3G42640	AT3G42640.1	0	1	1
AT4G30190	AT4G30190.1	0.024	0.987888	1
AT5G57350	AT5G57350.1	5.971	0.05052	0.410529
AT5G57350	AT5G57350.2	5.971	0.05052	0.410529
AT5G57350	AT5G57350.4	5.971	0.05052	0.410529
AT3G20080	AT3G20080.1	0	1	1
AT3G20080	AT3G20080.2	0	1	1
AT3G20080	AT3G20080.3	0	1	1
AT3G20080	AT3G20080.4	0	1	1
AT3G20080	AT3G20080.5	0	1	1
AT3G20080	AT3G20080.6	0	1	1
AT3G20090	AT3G20090.1	5.041	0.080422	0.561592
AT3G20090	AT3G20090.2	10.099	0.006411	0.093971
AT3G20100	AT3G20100.1	0	1	1
AT3G20140	AT3G20140.1	0.585	0.746479	1
AT3G20960	AT3G20960.1	0	1	1
AT3G20960	AT3G20960.2	1.709	0.425482	1
AT4G15350	AT4G15350.1	0	1	1
AT4G15380	AT4G15380.1	0	1	1
AT5G47990	AT5G47990.1	0	1	1
AT2G07190	AT2G07190.1	4.793	0.091048	0.609416
ATMG00710	ATMG00710.1	-2.893	1	1
AT1G61420	AT1G61420.3	1.399	0.496864	1
AT1G61420	AT1G61420.5	1.755	0.415765	1
AT1G61440	AT1G61440.1	0	1	1
AT1G61440	AT1G61440.2	4.262	0.118726	0.727883
AT1G61440	AT1G61440.3	0	1	1
AT1G61480	AT1G61480.1	0	1	1
AT1G61490	AT1G61490.1	0.487	0.784005	1
AT1G61490	AT1G61490.2	0.487	0.784005	1
AT1G61490	AT1G61490.3	0.242	0.885962	1
AT1G61490	AT1G61490.4	0.487	0.784005	1
AT1G61490	AT1G61490.5	0.487	0.784005	1
AT1G61490	AT1G61490.6	0.667	0.716496	1
AT1G61490	AT1G61490.7	0.667	0.716496	1
AT1G61550	AT1G61550.1	4.566	0.102	0.657201
AT1G63730	AT1G63730.1	13.066	0.001455	0.030816
AT1G63740	AT1G63740.1	21.12	2.6e-5	0.001193
AT1G63740	AT1G63740.2	18.748	8.5e-5	0.003115
AT1G63870	AT1G63870.1	14.388	7.51e-4	0.018094
AT1G63880	AT1G63880.1	37.765	0	0
AT1G63880	AT1G63880.2	18.948	7.7e-5	0.002879
AT1G64070	AT1G64070.1	6.922	0.031404	0.299043
AT2G16870	AT2G16870.1	7.924	0.019029	0.20899
AT2G16870	AT2G16870.2	18.809	8.2e-5	0.003038
AT2G16870	AT2G16870.3	18.809	8.2e-5	0.003038
AT2G07240	AT2G07240.1	0	1	1
AT1G20090	AT1G20090.1	0	1	1
AT1G75840	AT1G75840.1	0.001	0.999551	1
AT2G17800	AT2G17800.1	0	1	1
AT2G17800	AT2G17800.2	0	1	1
AT3G51300	AT3G51300.1	0	1	1
AT4G35020	AT4G35020.1	0.001	0.999608	1
AT4G35020	AT4G35020.2	0.001	0.999608	1
AT4G35020	AT4G35020.3	0.001	0.999608	1
AT4G35950	AT4G35950.1	0	1	1
AT1G60900	AT1G60900.1	0	1	1
AT1G07660	AT1G07660.1	0.002	0.999001	1
AT1G07820	AT1G07820.1	0.002	0.99901	1
AT1G07820	AT1G07820.2	0.002	0.99901	1
AT2G28740	AT2G28740.1	0.002	0.998975	1
AT3G45930	AT3G45930.1	0.002	0.998994	1
AT3G46320	AT3G46320.1	0.002	0.99899	1
AT3G53730	AT3G53730.1	0.002	0.998995	1
AT5G59690	AT5G59690.1	0.002	0.999069	1
AT5G59970	AT5G59970.1	0.002	0.999047	1
AT5G59970	AT5G59970.2	0.002	0.999047	1
AT1G56120	AT1G56120.1	0.63	0.729647	1
AT1G56120	AT1G56120.2	1.747	0.417416	1
AT1G56120	AT1G56120.3	0.298	0.861615	1
AT1G56130	AT1G56130.1	0.038	0.981174	1
AT1G56130	AT1G56130.2	0.038	0.981174	1
AT1G56130	AT1G56130.3	0.038	0.981174	1
AT1G56140	AT1G56140.1	0.156	0.924796	1
AT3G28070	AT3G28070.1	0.133	0.935521	1
AT3G28070	AT3G28070.2	0.331	0.847272	1
AT3G28070	AT3G28070.3	0.459	0.794959	1
AT3G28070	AT3G28070.4	0	1	1
AT3G28070	AT3G28070.5	0.453	0.797305	1
AT3G28080	AT3G28080.1	0.766	0.681846	1
AT3G28080	AT3G28080.2	0.268	0.874683	1
AT3G28080	AT3G28080.3	0.281	0.868966	1
AT3G28080	AT3G28080.4	0.04	0.980346	1
AT3G28080	AT3G28080.5	1.515	0.468894	1
AT3G28080	AT3G28080.6	0.568	0.752614	1
AT3G28080	AT3G28080.7	0.568	0.752614	1
AT3G28080	AT3G28080.8	0.568	0.752614	1
AT3G28080	AT3G28080.9	0.132	0.936098	1
AT3G28100	AT3G28100.1	0.634	0.72832	1
AT3G28130	AT3G28130.1	0	1	1
AT3G28130	AT3G28130.2	0	1	1
AT3G28130	AT3G28130.3	0	1	1
AT3G28130	AT3G28130.4	0	1	1
AT3G28130	AT3G28130.5	0	1	1
AT1G43722	AT1G43722.1	0	0.999929	1
AT3G30525	AT3G30525.1	0	0.999851	1
AT5G28730	AT5G28730.1	0	1	1
AT4G30820	AT4G30820.1	0.037	0.981667	1
AT4G30820	AT4G30820.10	0.008	0.995767	1
AT4G30820	AT4G30820.11	0.037	0.981667	1
AT4G30820	AT4G30820.12	0.008	0.995767	1
AT4G30820	AT4G30820.13	0.008	0.995767	1
AT4G30820	AT4G30820.14	0.037	0.981667	1
AT4G30820	AT4G30820.15	0.037	0.981667	1
AT4G30820	AT4G30820.16	0.008	0.995767	1
AT4G30820	AT4G30820.17	1.368	0.504698	1
AT4G30820	AT4G30820.18	0.008	0.995767	1
AT4G30820	AT4G30820.19	0.037	0.981667	1
AT4G30820	AT4G30820.2	0.037	0.981667	1
AT4G30820	AT4G30820.20	0.037	0.981667	1
AT4G30820	AT4G30820.21	0.008	0.995767	1
AT4G30820	AT4G30820.22	0.037	0.981667	1
AT4G30820	AT4G30820.23	0.037	0.981667	1
AT4G30820	AT4G30820.24	0.037	0.981667	1
AT4G30820	AT4G30820.25	0.037	0.981667	1
AT4G30820	AT4G30820.26	0.037	0.981667	1
AT4G30820	AT4G30820.27	0.037	0.981667	1
AT4G30820	AT4G30820.3	0.037	0.981667	1
AT4G30820	AT4G30820.4	0.037	0.981667	1
AT4G30820	AT4G30820.5	0.037	0.981667	1
AT4G30820	AT4G30820.6	0.037	0.981667	1
AT4G30820	AT4G30820.7	0.037	0.981667	1
AT4G30820	AT4G30820.8	0.037	0.981667	1
AT4G30820	AT4G30820.9	0.037	0.981667	1
AT1G64230	AT1G64230.1	0	1	1
AT1G64230	AT1G64230.2	0	1	1
AT3G08690	AT3G08690.1	0.002	0.999219	1
AT3G08690	AT3G08690.2	0.002	0.999219	1
AT4G27960	AT4G27960.1	0.001	0.99946	1
AT5G41700	AT5G41700.1	0	1	1
AT5G41700	AT5G41700.2	0	1	1
AT5G41700	AT5G41700.5	0	1	1
AT5G53300	AT5G53300.1	0.001	0.999393	1
AT5G53300	AT5G53300.2	0.001	0.999393	1
AT5G53300	AT5G53300.4	0.001	0.999393	1
AT1G52360	AT1G52360.1	0	1	1
AT1G52360	AT1G52360.3	0	1	1
AT1G52360	AT1G52360.4	0	1	1
AT3G15980	AT3G15980.2	0	1	1
AT3G15980	AT3G15980.3	0	1	1
AT3G15980	AT3G15980.4	0	1	1
AT3G15980	AT3G15980.6	0	1	1
AT1G24800	AT1G24800.1	31.636	0	0
AT1G24881	AT1G24881.1	31.636	0	0
AT1G25055	AT1G25055.1	31.636	0	0
AT1G25150	AT1G25150.1	31.636	0	0
AT1G25150	AT1G25150.2	31.636	0	0
AT1G25211	AT1G25211.1	30.431	0	0
AT3G13680	AT3G13680.1	11.902	0.002603	0.048276
AT4G17200	AT4G17200.1	4.325	0.115052	0.713369
AT1G29720	AT1G29720.1	5.597	0.060905	0.465093
AT1G58400	AT1G58400.1	1.188	0.552206	1
AT1G58400	AT1G58400.2	1.043	0.593503	1
AT1G58400	AT1G58400.3	1.043	0.593503	1
AT1G58410	AT1G58410.1	0.428	0.807411	1
AT1G58410	AT1G58410.2	0.428	0.807411	1
AT1G58410	AT1G58410.3	0	1	1
AT1G58410	AT1G58410.4	0.428	0.807411	1
AT1G59620	AT1G59620.2	12.267	0.002169	0.042031
AT1G64840	AT1G64840.1	1.186	0.552585	1
AT1G28690	AT1G28690.1	0.366	0.832861	1
AT1G66410	AT1G66410.1	0.002	0.998956	1
AT2G27030	AT2G27030.1	0.003	0.998532	1
AT2G27030	AT2G27030.3	0.003	0.998534	1
AT2G41110	AT2G41110.1	0.003	0.998517	1
AT3G43810	AT3G43810.1	-1.344	1	1
AT3G56800	AT3G56800.1	0.003	0.998534	1
AT5G21274	AT5G21274.1	0.002	0.99903	1
AT5G37780	AT5G37780.1	0.002	0.998853	1
AT1G16030	AT1G16030.1	0	1	1
AT1G56410	AT1G56410.1	0	1	1
AT3G09440	AT3G09440.1	0.858	0.651159	1
AT3G09440	AT3G09440.2	0.858	0.651161	1
AT3G09440	AT3G09440.3	0.858	0.651159	1
AT3G09440	AT3G09440.4	0.858	0.651159	1
AT3G12580	AT3G12580.1	0	1	1
AT5G02490	AT5G02490.1	0	1	1
AT5G02500	AT5G02500.1	0	1	1
AT1G45215	AT1G45215.1	6.584	0.037175	0.332925
AT1G45221	AT1G45221.1	6.787	0.03359	0.312407
AT1G45223	AT1G45223.1	7.348	0.025371	0.256459
AT1G57760	AT1G57760.1	6.544	0.037929	0.337948
AT1G57775	AT1G57775.1	5.792	0.055232	0.435014
AT1G57777	AT1G57777.1	5.241	0.072756	0.526054
AT3G44115	AT3G44115.1	7.993	0.018378	0.203562
AT4G07515	AT4G07515.1	6.959	0.030822	0.295471
AT4G08025	AT4G08025.1	7.387	0.024888	0.253231
AT1G45100	AT1G45100.1	88.264	0	0
AT3G10845	AT3G10845.1	62.415	0	0
AT3G48835	AT3G48835.1	68.405	0	0
AT5G41690	AT5G41690.1	36.834	0	0
AT5G41690	AT5G41690.2	36.834	0	0
AT5G41690	AT5G41690.3	36.834	0	0
AT1G32940	AT1G32940.1	2.541	0.280696	1
AT1G32950	AT1G32950.1	0	1	1
AT1G32950	AT1G32950.2	0	1	1
AT1G32960	AT1G32960.1	0.023	0.988445	1
AT1G32970	AT1G32970.1	0	1	1
AT4G10510	AT4G10510.3	2.845	0.241145	1
AT4G10540	AT4G10540.1	1.808	0.404929	1
AT4G10550	AT4G10550.1	8.162	0.01689	0.191699
AT4G10550	AT4G10550.2	8.162	0.01689	0.191699
AT4G10550	AT4G10550.3	8.162	0.01689	0.191699
AT4G10550	AT4G10550.4	8.162	0.01689	0.191699
AT2G35585	AT2G35585.1	0	1	1
AT2G35585	AT2G35585.2	0.17	0.918571	1
AT1G26570	AT1G26570.1	0	1	1
AT3G29360	AT3G29360.1	0	1	1
AT3G29360	AT3G29360.2	-3.823	1	1
AT5G15490	AT5G15490.1	0	1	1
AT5G39320	AT5G39320.1	0	1	1
AT3G14415	AT3G14415.1	0	1	1
AT3G14415	AT3G14415.3	0	1	1
AT3G14420	AT3G14420.1	0	1	1
AT3G14420	AT3G14420.2	0	1	1
AT4G18360	AT4G18360.1	0.083	0.959452	1
AT4G18360	AT4G18360.4	0	1	1
AT3G02600	AT3G02600.1	0	1	1
AT3G02600	AT3G02600.10	0	1	1
AT3G02600	AT3G02600.11	0	1	1
AT3G02600	AT3G02600.12	0	1	1
AT3G02600	AT3G02600.2	0	1	1
AT3G02600	AT3G02600.3	0	1	1
AT3G02600	AT3G02600.4	0	1	1
AT3G02600	AT3G02600.5	0	1	1
AT3G02600	AT3G02600.6	0	1	1
AT3G02600	AT3G02600.7	0	1	1
AT3G02600	AT3G02600.8	0	1	1
AT3G02600	AT3G02600.9	0	1	1
AT2G25440	AT2G25440.1	0	1	1
AT2G32680	AT2G32680.1	24.231	5e-6	3.05e-4
AT2G33020	AT2G33020.1	33.273	0	0
AT3G24900	AT3G24900.1	23.196	9e-6	4.96e-4
AT3G24900	AT3G24900.2	30.075	0	0
AT3G24982	AT3G24982.1	14.184	8.32e-4	0.019726
AT3G25010	AT3G25010.1	19.153	6.9e-5	0.002636
AT3G25010	AT3G25010.2	24.935	4e-6	2.49e-4
AT3G25020	AT3G25020.1	20.996	2.8e-5	0.001272
AT2G41660	AT2G41660.1	0	1	1
AT5G40680	AT5G40680.1	0	1	1
AT1G35820	AT1G35820.1	0.006	0.996932	1
AT1G43720	AT1G43720.1	0.075	0.96316	1
AT3G42870	AT3G42870.1	4.437	0.108792	0.688349
AT1G14400	AT1G14400.1	0.002	0.998945	1
AT1G14400	AT1G14400.2	0.002	0.998945	1
AT2G02760	AT2G02760.1	0.002	0.999136	1
AT2G02760	AT2G02760.2	0.002	0.999136	1
AT2G02760	AT2G02760.3	0.002	0.999136	1
AT2G02760	AT2G02760.4	0.002	0.999136	1
AT1G77080	AT1G77080.10	8.708	0.012853	0.157988
AT1G77080	AT1G77080.11	6.406	0.040631	0.354952
AT1G77080	AT1G77080.12	8.933	0.011487	0.144721
AT1G77080	AT1G77080.2	7.715	0.021116	0.224962
AT1G77080	AT1G77080.3	11.468	0.003233	0.05654
AT1G77080	AT1G77080.4	6.406	0.040631	0.354952
AT1G77080	AT1G77080.5	6.406	0.040631	0.354952
AT1G77080	AT1G77080.6	8.708	0.012853	0.157988
AT1G77080	AT1G77080.7	8.708	0.012853	0.157988
AT1G77080	AT1G77080.8	6.406	0.040631	0.354952
AT1G77080	AT1G77080.9	8.708	0.012853	0.157988
AT5G65050	AT5G65050.1	0.509	0.775471	1
AT5G65050	AT5G65050.2	5.646	0.059419	0.458937
AT5G65050	AT5G65050.3	5.628	0.059967	0.461728
AT5G65050	AT5G65050.4	6.429	0.04017	0.352334
AT5G65050	AT5G65050.5	5.315	0.070124	0.512009
AT5G65060	AT5G65060.1	3.815	0.148414	0.838453
AT5G65060	AT5G65060.2	4.156	0.125151	0.754074
AT5G65060	AT5G65060.3	3.815	0.148414	0.838453
AT2G30740	AT2G30740.1	0.082	0.959849	1
AT2G30740	AT2G30740.10	0.082	0.959849	1
AT2G30740	AT2G30740.11	0.087	0.957388	1
AT2G30740	AT2G30740.12	0.082	0.959849	1
AT2G30740	AT2G30740.13	0.082	0.959849	1
AT2G30740	AT2G30740.14	0.082	0.959849	1
AT2G30740	AT2G30740.15	0	1	1
AT2G30740	AT2G30740.2	0.082	0.959849	1
AT2G30740	AT2G30740.3	0.087	0.957388	1
AT2G30740	AT2G30740.4	0.087	0.957388	1
AT2G30740	AT2G30740.5	0.082	0.959849	1
AT2G30740	AT2G30740.6	0.082	0.959849	1
AT2G30740	AT2G30740.7	0.087	0.957388	1
AT2G30740	AT2G30740.8	0	1	1
AT2G30740	AT2G30740.9	0.087	0.957388	1
AT2G31450	AT2G31450.1	0	1	1
AT2G31450	AT2G31450.2	5.125	0.077118	0.546107
AT4G16857	AT4G16857.1	22.105	1.6e-5	8.06e-4
AT4G16857	AT4G16857.2	23.928	6e-6	3.54e-4
AT4G16860	AT4G16860.1	39.854	0	0
AT4G16860	AT4G16860.2	40.93	0	0
AT4G16890	AT4G16890.1	44.179	0	0
AT4G16890	AT4G16890.2	69.403	0	0
AT4G16890	AT4G16890.3	47.933	0	0
AT4G16890	AT4G16890.4	67.417	0	0
AT4G16890	AT4G16890.5	44.179	0	0
AT4G16920	AT4G16920.1	34.876	0	0
AT4G16920	AT4G16920.2	74.729	0	0
AT4G16920	AT4G16920.3	71.397	0	0
AT4G16920	AT4G16920.4	79.818	0	0
AT4G16920	AT4G16920.5	71.397	0	0
AT4G16920	AT4G16920.6	70.121	0	0
AT4G16920	AT4G16920.7	79.818	0	0
AT4G16920	AT4G16920.8	74.729	0	0
AT4G16920	AT4G16920.9	34.876	0	0
AT4G16950	AT4G16950.1	70.555	0	0
AT4G16950	AT4G16950.2	72.063	0	0
AT4G16950	AT4G16950.3	70.555	0	0
AT4G16950	AT4G16950.4	70.555	0	0
AT4G16950	AT4G16950.5	70.555	0	0
AT4G16950	AT4G16950.6	70.555	0	0
AT3G03360	AT3G03360.1	34.828	0	0
AT2G20340	AT2G20340.1	0.059	0.971123	1
AT2G20340	AT2G20340.2	0	1	1
AT1G07920	AT1G07920.1	0.002	0.998805	1
AT1G07930	AT1G07930.1	0.002	0.998816	1
AT1G07940	AT1G07940.1	0.002	0.998823	1
AT1G07940	AT1G07940.2	0.002	0.998823	1
AT1G07940	AT1G07940.3	0.002	0.998823	1
AT1G07940	AT1G07940.4	0.002	0.998823	1
AT5G60390	AT5G60390.1	0.002	0.999226	1
AT5G60390	AT5G60390.2	0.002	0.999226	1
AT5G60390	AT5G60390.3	0.002	0.999226	1
AT1G28170	AT1G28170.1	0	1	1
AT3G45080	AT3G45080.1	0	1	1
AT4G26280	AT4G26280.1	0	1	1
AT5G43690	AT5G43690.1	0	1	1
AT1G50080	AT1G50080.1	0	1	1
AT1G60720	AT1G60720.1	-1.853	1	1
AT2G19146	AT2G19146.1	0	1	1
AT3G25720	AT3G25720.1	0	1	1
AT4G10613	AT4G10613.1	0	1	1
AT1G61970	AT1G61970.1	9.751	0.007633	0.106822
AT1G61970	AT1G61970.2	9.751	0.007633	0.106822
AT1G61970	AT1G61970.3	9.751	0.007633	0.106822
AT1G61970	AT1G61970.4	9.751	0.007633	0.106822
AT1G61970	AT1G61970.5	9.751	0.007633	0.106822
AT1G61970	AT1G61970.6	9.751	0.007633	0.106822
AT1G61970	AT1G61970.7	9.751	0.007633	0.106822
AT1G61980	AT1G61980.1	15.249	4.88e-4	0.012733
AT1G61980	AT1G61980.2	15.249	4.88e-4	0.012733
AT1G61980	AT1G61980.3	15.249	4.88e-4	0.012733
AT1G07780	AT1G07780.1	0	1	1
AT1G07780	AT1G07780.10	0	1	1
AT1G07780	AT1G07780.11	0	1	1
AT1G07780	AT1G07780.12	0	1	1
AT1G07780	AT1G07780.13	0	1	1
AT1G07780	AT1G07780.2	0	1	1
AT1G07780	AT1G07780.3	0	1	1
AT1G07780	AT1G07780.4	-0.007	1	1
AT1G07780	AT1G07780.5	0	1	1
AT1G07780	AT1G07780.6	0.395	0.820673	1
AT1G07780	AT1G07780.8	0.395	0.820673	1
AT1G07780	AT1G07780.9	0	1	1
AT1G29410	AT1G29410.1	0.071	0.965332	1
AT1G29410	AT1G29410.2	0	1	1
AT1G29410	AT1G29410.3	0	1	1
AT1G29410	AT1G29410.4	0	1	1
AT1G29410	AT1G29410.5	0	1	1
AT1G29410	AT1G29410.6	0.071	0.965137	1
AT1G29410	AT1G29410.7	0	1	1
AT5G05590	AT5G05590.1	0	1	1
AT5G05590	AT5G05590.2	0.373	0.829739	1
AT5G05590	AT5G05590.3	0	1	1
AT5G05590	AT5G05590.4	0.373	0.829739	1
AT2G26135	AT2G26135.1	14.483	7.16e-4	0.01742
AT3G43750	AT3G43750.1	11.939	0.002555	0.047717
AT3G45460	AT3G45460.1	4.703	0.095229	0.626113
AT3G45480	AT3G45480.1	14.614	6.71e-4	0.01651
AT3G45510	AT3G45510.1	21.371	2.3e-5	0.001089
AT3G45570	AT3G45570.1	1.227	0.541379	1
AT3G45580	AT3G45580.1	9.763	0.007585	0.106471
AT1G51860	AT1G51860.1	0	1	1
AT1G51860	AT1G51860.2	0	1	1
AT1G51870	AT1G51870.1	5.742	0.056647	0.443838
AT1G51870	AT1G51870.2	5.924	0.05171	0.416462
AT1G51880	AT1G51880.1	5.71	0.057544	0.448184
AT1G51880	AT1G51880.2	5.71	0.057544	0.448184
AT1G51880	AT1G51880.3	5.71	0.057544	0.448184
AT1G51890	AT1G51890.1	1.529	0.465526	1
AT1G51890	AT1G51890.2	1.529	0.465526	1
AT1G51890	AT1G51890.3	1.529	0.465526	1
AT1G51890	AT1G51890.4	0.898	0.63813	1
AT1G51890	AT1G51890.5	0.137	0.933766	1
AT1G51910	AT1G51910.1	0.069	0.966301	1
AT1G32430	AT1G32430.1	11.36	0.003413	0.058911
AT1G47390	AT1G47390.1	21.411	2.2e-5	0.001053
AT2G14710	AT2G14710.1	15.909	3.51e-4	0.009798
AT3G16580	AT3G16580.1	11.975	0.00251	0.046995
AT1G21210	AT1G21210.1	37.247	0	0
AT1G21230	AT1G21230.1	1.048	0.59228	1
AT1G21240	AT1G21240.1	9.451	0.008867	0.119454
AT1G21240	AT1G21240.2	2.37	0.305683	1
AT1G21250	AT1G21250.1	14.503	7.09e-4	0.017307
AT1G21270	AT1G21270.1	8.163	0.016881	0.191699
AT1G05230	AT1G05230.1	0	1	1
AT1G05230	AT1G05230.10	0	1	1
AT1G05230	AT1G05230.11	0	1	1
AT1G05230	AT1G05230.2	0	1	1
AT1G05230	AT1G05230.3	0	1	1
AT1G05230	AT1G05230.4	0	1	1
AT1G05230	AT1G05230.5	0	1	1
AT1G05230	AT1G05230.6	0	1	1
AT1G05230	AT1G05230.7	0	1	1
AT1G05230	AT1G05230.8	0	1	1
AT1G05230	AT1G05230.9	0	1	1
AT2G32370	AT2G32370.1	0	1	1
AT1G01620	AT1G01620.1	0	1	1
AT2G45960	AT2G45960.1	0.001	0.999565	1
AT3G61430	AT3G61430.1	0.001	0.999379	1
AT3G61430	AT3G61430.2	0.001	0.999379	1
AT4G00430	AT4G00430.1	0	1	1
AT4G23400	AT4G23400.1	0.001	0.99949	1
AT5G52930	AT5G52930.1	27.179	1e-6	7.5e-5
AT5G52940	AT5G52940.1	0.481	0.786118	1
AT5G54320	AT5G54320.1	12.02	0.002454	0.046198
AT5G54330	AT5G54330.1	3.589	0.166206	0.900784
AT5G54550	AT5G54550.1	26.91	1e-6	7.5e-5
AT5G54560	AT5G54560.1	25.935	2e-6	1.36e-4
AT5G55270	AT5G55270.1	10.703	0.00474	0.074952
AT5G55880	AT5G55880.1	0.031	0.984701	1
AT5G55890	AT5G55890.1	0.031	0.984701	1
AT3G46060	AT3G46060.1	0.001	0.999433	1
AT3G46060	AT3G46060.2	0.001	0.999433	1
AT3G46060	AT3G46060.3	0.001	0.999433	1
AT3G53610	AT3G53610.1	0.001	0.999443	1
AT3G53610	AT3G53610.2	0.001	0.999443	1
AT3G53610	AT3G53610.3	0.001	0.999443	1
AT5G59840	AT5G59840.1	0.001	0.999605	1
AT4G04775	AT4G04775.1	0.54	0.763447	1
AT5G15690	AT5G15690.1	0.305	0.858501	1
AT1G71390	AT1G71390.1	0.032	0.983887	1
AT1G71390	AT1G71390.2	0	1	1
AT3G05360	AT3G05360.1	0	1	1
AT1G66100	AT1G66100.1	6.831	0.032866	0.308066
AT5G36910	AT5G36910.1	21.543	2.1e-5	0.001018
AT2G29600	AT2G29600.1	31.191	0	0
AT2G29770	AT2G29770.1	27.094	1e-6	7.5e-5
AT2G29780	AT2G29780.1	20.183	4.1e-5	0.001732
AT2G29780	AT2G29780.2	12.141	0.00231	0.044028
AT2G29800	AT2G29800.1	6.325	0.042318	0.365137
AT2G29810	AT2G29810.1	23.693	7e-6	4.05e-4
AT2G29820	AT2G29820.1	11.487	0.003204	0.056139
AT2G29830	AT2G29830.1	7.675	0.021547	0.227928
AT2G29860	AT2G29860.1	23.838	7e-6	4.05e-4
AT1G21990	AT1G21990.1	35.536	0	0
AT2G29930	AT2G29930.1	20.818	3e-5	0.00134
AT2G29930	AT2G29930.2	24.487	5e-6	3.05e-4
AT2G29930	AT2G29930.3	20.818	3e-5	0.00134
AT4G27050	AT4G27050.1	7.541	0.023036	0.238972
AT4G27050	AT4G27050.2	7.541	0.023036	0.238972
AT4G27050	AT4G27050.3	7.541	0.023036	0.238972
AT4G27050	AT4G27050.4	7.541	0.023036	0.238972
AT4G27050	AT4G27050.5	7.541	0.023036	0.238972
AT1G15890	AT1G15890.1	19.762	5.1e-5	0.002065
AT1G15890	AT1G15890.2	19.242	6.6e-5	0.002537
AT1G51480	AT1G51480.1	51.664	0	0
AT5G43730	AT5G43730.1	47.334	0	0
AT5G43730	AT5G43730.2	47.334	0	0
AT5G43730	AT5G43730.3	47.334	0	0
AT5G43730	AT5G43730.4	47.334	0	0
AT5G43730	AT5G43730.5	47.334	0	0
AT5G43740	AT5G43740.1	92.882	0	0
AT5G43740	AT5G43740.2	92.882	0	0
AT1G15350	AT1G15350.1	0	1	1
AT1G15350	AT1G15350.2	0	1	1
AT1G15350	AT1G15350.3	0.494	0.780999	1
AT1G15350	AT1G15350.4	0.494	0.780999	1
AT1G15350	AT1G15350.5	0.494	0.780999	1
AT1G15350	AT1G15350.6	0.494	0.780999	1
AT1G28570	AT1G28570.1	0.345	0.841631	1
AT1G28570	AT1G28570.2	19.057	7.3e-5	0.002754
AT1G28570	AT1G28570.3	7.777	0.020475	0.220155
AT1G28580	AT1G28580.1	0.695	0.706338	1
AT1G28580	AT1G28580.2	0	1	1
AT1G28590	AT1G28590.1	0	1	1
AT1G28600	AT1G28600.1	7.403	0.024683	0.251613
AT1G31550	AT1G31550.1	0.003	0.998256	1
AT1G31550	AT1G31550.2	0	1	1
AT2G27360	AT2G27360.1	6.671	0.035588	0.324407
AT1G27360	AT1G27360.1	14.099	8.68e-4	0.020307
AT1G27360	AT1G27360.2	14.099	8.68e-4	0.020307
AT1G27360	AT1G27360.3	14.099	8.68e-4	0.020307
AT1G27360	AT1G27360.4	14.099	8.68e-4	0.020307
AT1G27370	AT1G27370.1	0	1	1
AT1G27370	AT1G27370.2	0	1	1
AT1G27370	AT1G27370.3	0	1	1
AT1G27370	AT1G27370.4	0	1	1
AT1G27370	AT1G27370.5	0	1	1
AT1G27370	AT1G27370.6	0	1	1
AT1G27370	AT1G27370.7	0	1	1
AT5G40700	AT5G40700.1	11.586	0.00305	0.054234
AT5G40700	AT5G40700.2	10.346	0.005666	0.085238
AT5G40700	AT5G40700.3	12.296	0.002138	0.041538
AT1G07770	AT1G07770.1	0.002	0.998758	1
AT1G07770	AT1G07770.2	0.003	0.998717	1
AT1G07770	AT1G07770.3	0.003	0.998717	1
AT5G59850	AT5G59850.1	0.003	0.998728	1
AT1G02500	AT1G02500.1	0	1	1
AT1G02500	AT1G02500.2	0	1	1
AT2G36880	AT2G36880.1	0.002	0.998853	1
AT2G36880	AT2G36880.2	0.002	0.998853	1
AT3G17390	AT3G17390.1	0	1	1
AT4G01850	AT4G01850.1	0	1	1
AT4G01850	AT4G01850.2	0	1	1
AT1G09840	AT1G09840.1	0	1	1
AT1G09840	AT1G09840.10	0	1	1
AT1G09840	AT1G09840.2	0	1	1
AT1G09840	AT1G09840.3	0	1	1
AT1G09840	AT1G09840.4	0	1	1
AT1G09840	AT1G09840.5	0	1	1
AT1G09840	AT1G09840.6	0	1	1
AT1G09840	AT1G09840.7	0	1	1
AT1G09840	AT1G09840.8	0	1	1
AT1G09840	AT1G09840.9	0	1	1
AT1G57870	AT1G57870.1	0	1	1
AT1G57870	AT1G57870.2	0	1	1
AT1G57870	AT1G57870.4	0	1	1
AT3G31910	AT3G31910.1	0	1	1
AT4G08430	AT4G08430.1	0	1	1
AT5G28235	AT5G28235.1	0	1	1
AT5G28810	AT5G28810.1	0	1	1
AT5G45570	AT5G45570.1	0	1	1
AT5G45570	AT5G45570.2	0	1	1
AT4G32850	AT4G32850.1	0	1	1
AT4G32850	AT4G32850.10	0	1	1
AT4G32850	AT4G32850.11	0	1	1
AT4G32850	AT4G32850.12	0	1	1
AT4G32850	AT4G32850.13	0	1	1
AT4G32850	AT4G32850.14	0	1	1
AT4G32850	AT4G32850.15	0	1	1
AT4G32850	AT4G32850.16	0	1	1
AT4G32850	AT4G32850.17	0	1	1
AT4G32850	AT4G32850.2	0	1	1
AT4G32850	AT4G32850.3	0	1	1
AT4G32850	AT4G32850.4	0	1	1
AT4G32850	AT4G32850.5	10.393	0.005537	0.083803
AT4G32850	AT4G32850.6	0	1	1
AT4G32850	AT4G32850.7	0	1	1
AT4G32850	AT4G32850.8	0	1	1
AT4G32850	AT4G32850.9	10.393	0.005537	0.083803
AT2G42460	AT2G42460.1	2.465	0.29161	1
AT2G42470	AT2G42470.1	19.205	6.8e-5	0.002603
AT1G61240	AT1G61240.1	0	1	1
AT1G61240	AT1G61240.2	0	1	1
AT1G61240	AT1G61240.3	0	1	1
AT1G61240	AT1G61240.4	0	1	1
AT1G61240	AT1G61240.5	0	1	1
AT1G61240	AT1G61240.6	0	1	1
AT2G04920	AT2G04920.1	19.306	6.4e-5	0.002473
AT3G22350	AT3G22350.1	47.675	0	0
AT3G22350	AT3G22350.2	46.218	0	0
AT3G22700	AT3G22700.1	12.484	0.001946	0.038741
AT3G22710	AT3G22710.1	6.35	0.041797	0.362427
AT3G22720	AT3G22720.1	8.361	0.015294	0.178733
AT3G22730	AT3G22730.1	60.13	0	0
AT5G43990	AT5G43990.1	1.183	0.553417	1
AT5G43990	AT5G43990.10	0	1	1
AT5G43990	AT5G43990.11	0	1	1
AT5G43990	AT5G43990.12	2.67	0.263203	1
AT5G43990	AT5G43990.13	2.67	0.263203	1
AT5G43990	AT5G43990.14	0	1	1
AT5G43990	AT5G43990.15	1.283	0.526406	1
AT5G43990	AT5G43990.16	0	1	1
AT5G43990	AT5G43990.17	1.283	0.526406	1
AT5G43990	AT5G43990.2	0	1	1
AT5G43990	AT5G43990.3	1.183	0.553417	1
AT5G43990	AT5G43990.4	0	1	1
AT5G43990	AT5G43990.5	-0.003	1	1
AT5G43990	AT5G43990.6	2.67	0.263203	1
AT5G43990	AT5G43990.7	2.968	0.22669	1
AT5G43990	AT5G43990.8	2.67	0.263203	1
AT5G43990	AT5G43990.9	0	1	1
AT2G37150	AT2G37150.1	1.666	0.434643	1
AT2G37150	AT2G37150.10	1.666	0.434643	1
AT2G37150	AT2G37150.11	1.666	0.434643	1
AT2G37150	AT2G37150.12	1.666	0.434643	1
AT2G37150	AT2G37150.13	1.666	0.434643	1
AT2G37150	AT2G37150.14	1.666	0.434643	1
AT2G37150	AT2G37150.15	1.666	0.434643	1
AT2G37150	AT2G37150.2	1.666	0.434643	1
AT2G37150	AT2G37150.3	1.666	0.434643	1
AT2G37150	AT2G37150.4	1.666	0.434643	1
AT2G37150	AT2G37150.5	1.666	0.434643	1
AT2G37150	AT2G37150.6	1.666	0.434643	1
AT2G37150	AT2G37150.7	1.666	0.434643	1
AT2G37150	AT2G37150.8	1.666	0.434643	1
AT2G37150	AT2G37150.9	1.666	0.434643	1
AT4G15215	AT4G15215.1	0	1	1
AT4G15215	AT4G15215.10	0	1	1
AT4G15215	AT4G15215.11	0	1	1
AT4G15215	AT4G15215.2	0	1	1
AT4G15215	AT4G15215.3	0	1	1
AT4G15215	AT4G15215.4	0	1	1
AT4G15215	AT4G15215.5	0	1	1
AT4G15215	AT4G15215.6	0	1	1
AT4G15215	AT4G15215.7	0	1	1
AT4G15215	AT4G15215.8	0	1	1
AT4G15215	AT4G15215.9	0	1	1
AT4G15230	AT4G15230.1	0.06	0.970602	1
AT4G15230	AT4G15230.2	0.315	0.854169	1
AT4G15230	AT4G15230.3	0.06	0.970602	1
AT4G15230	AT4G15230.4	0.06	0.970602	1
AT1G06710	AT1G06710.1	0	1	1
AT1G06710	AT1G06710.10	0	1	1
AT1G06710	AT1G06710.11	0	1	1
AT1G06710	AT1G06710.12	0	1	1
AT1G06710	AT1G06710.13	0	1	1
AT1G06710	AT1G06710.14	0	1	1
AT1G06710	AT1G06710.15	0	1	1
AT1G06710	AT1G06710.16	0	1	1
AT1G06710	AT1G06710.17	0	1	1
AT1G06710	AT1G06710.18	0	1	1
AT1G06710	AT1G06710.19	0	1	1
AT1G06710	AT1G06710.2	0	1	1
AT1G06710	AT1G06710.3	0	1	1
AT1G06710	AT1G06710.4	0	1	1
AT1G06710	AT1G06710.5	0	1	1
AT1G06710	AT1G06710.6	0	1	1
AT1G06710	AT1G06710.7	0	1	1
AT1G06710	AT1G06710.8	0	1	1
AT1G06710	AT1G06710.9	0	1	1
AT4G00155	AT4G00155.1	0	0.999998	1
AT4G13320	AT4G13320.1	0	1	1
AT1G04820	AT1G04820.1	-0.147	1	1
AT1G50010	AT1G50010.1	-0.152	1	1
AT1G64740	AT1G64740.1	0	1	1
AT4G14960	AT4G14960.2	0	0.999998	1
AT5G19770	AT5G19770.1	0	1	1
AT5G19780	AT5G19780.1	0	0.999999	1
AT5G18010	AT5G18010.1	0	1	1
AT5G18020	AT5G18020.1	0	0.999754	1
AT5G18030	AT5G18030.1	0.065	0.968051	1
AT5G18050	AT5G18050.1	0	0.999945	1
AT5G18060	AT5G18060.1	0	1	1
AT5G18080	AT5G18080.1	0	1	1
AT5G06120	AT5G06120.10	0	1	1
AT5G06120	AT5G06120.2	0	1	1
AT5G06120	AT5G06120.3	0	1	1
AT5G06120	AT5G06120.4	0	1	1
AT5G06120	AT5G06120.5	0	1	1
AT5G06120	AT5G06120.6	0	1	1
AT5G06120	AT5G06120.7	0	1	1
AT5G06120	AT5G06120.8	0	1	1
AT5G06120	AT5G06120.9	0	1	1
AT1G71880	AT1G71880.1	2.683	0.261432	1
AT1G71890	AT1G71890.1	0	1	1
AT2G14670	AT2G14670.1	0	1	1
AT5G06170	AT5G06170.1	0.402	0.817887	1
AT5G43610	AT5G43610.1	0	1	1
AT3G12250	AT3G12250.1	2.018	0.364588	1
AT3G12250	AT3G12250.2	2.018	0.364588	1
AT3G12250	AT3G12250.6	2.018	0.364588	1
AT3G12250	AT3G12250.7	2.018	0.364588	1
AT5G06950	AT5G06950.1	0	1	1
AT5G06950	AT5G06950.2	0	1	1
AT5G06950	AT5G06950.3	0	1	1
AT5G06950	AT5G06950.4	0	1	1
AT5G06950	AT5G06950.5	0	1	1
AT4G35030	AT4G35030.1	0.234	0.889795	1
AT4G35030	AT4G35030.2	4.899	0.086335	0.587801
AT4G35030	AT4G35030.3	5.605	0.06066	0.464268
AT4G35030	AT4G35030.4	6.339	0.042025	0.363522
AT4G35030	AT4G35030.5	5.605	0.06066	0.464268
AT4G35030	AT4G35030.6	5.605	0.06066	0.464268
AT4G35030	AT4G35030.7	5.605	0.06066	0.464268
AT4G35030	AT4G35030.8	0.234	0.889795	1
AT4G35030	AT4G35030.9	7.817	0.020073	0.216692
AT4G05320	AT4G05320.1	0.007	0.996278	1
AT4G05320	AT4G05320.2	0.007	0.996277	1
AT4G05320	AT4G05320.3	0.007	0.99629	1
AT4G05320	AT4G05320.4	-16.625	1	1
AT4G05320	AT4G05320.6	0.007	0.996281	1
AT5G20620	AT5G20620.1	0	1	1
AT2G18780	AT2G18780.1	2.374	0.305207	1
AT3G16740	AT3G16740.1	14.708	6.4e-4	0.015937
AT3G17620	AT3G17620.1	15.312	4.73e-4	0.012473
AT4G09440	AT4G09440.1	3.073	0.215134	1
AT5G37410	AT5G37410.1	8.051	0.017857	0.199277
AT5G37410	AT5G37410.2	8.051	0.017857	0.199277
AT5G37420	AT5G37420.1	10.157	0.006231	0.091767
AT5G37430	AT5G37430.1	11.148	0.003795	0.063901
AT5G37460	AT5G37460.1	15.395	4.54e-4	0.012127
AT5G37470	AT5G37470.1	10.357	0.005636	0.084855
AT5G37470	AT5G37470.2	10.595	0.005004	0.078095
AT5G37920	AT5G37920.1	6.593	0.037008	0.332213
AT5G47455	AT5G47455.1	0	1	1
AT5G47455	AT5G47455.10	0	1	1
AT5G47455	AT5G47455.11	0	1	1
AT5G47455	AT5G47455.2	0	1	1
AT5G47455	AT5G47455.3	0	1	1
AT5G47455	AT5G47455.4	0	1	1
AT5G47455	AT5G47455.5	0	1	1
AT5G47455	AT5G47455.6	0	1	1
AT5G47455	AT5G47455.7	0	1	1
AT5G47455	AT5G47455.8	0	1	1
AT5G47455	AT5G47455.9	0	1	1
AT3G28956	AT3G28956.1	18.195	1.12e-4	0.003836
AT3G28956	AT3G28956.10	17.389	1.67e-4	0.005309
AT3G28956	AT3G28956.11	18.195	1.12e-4	0.003836
AT3G28956	AT3G28956.12	18.195	1.12e-4	0.003836
AT3G28956	AT3G28956.2	3.928	0.140271	0.808345
AT3G28956	AT3G28956.3	17.389	1.67e-4	0.005309
AT3G28956	AT3G28956.4	0.063	0.969172	1
AT3G28956	AT3G28956.5	18.195	1.12e-4	0.003836
AT3G28956	AT3G28956.6	18.195	1.12e-4	0.003836
AT3G28956	AT3G28956.7	3.928	0.140271	0.808345
AT3G28956	AT3G28956.8	17.389	1.67e-4	0.005309
AT3G28956	AT3G28956.9	18.195	1.12e-4	0.003836
AT5G62950	AT5G62950.1	6.978	0.030532	0.293326
AT5G62950	AT5G62950.2	1.84	0.398442	1
AT5G62950	AT5G62950.3	6.978	0.030532	0.293326
AT5G62950	AT5G62950.4	6.978	0.030532	0.293326
AT5G62950	AT5G62950.5	4.63	0.098778	0.642282
AT5G62950	AT5G62950.6	4.63	0.098778	0.642282
AT5G62950	AT5G62950.7	6.978	0.030532	0.293326
AT2G38590	AT2G38590.1	53.799	0	0
AT3G23680	AT3G23680.1	12.323	0.002109	0.041147
AT3G23685	AT3G23685.1	1.894	0.387974	1
AT3G25090	AT3G25090.1	6.015	0.04941	0.40443
AT3G25090	AT3G25090.2	0.141	0.932076	1
AT4G33290	AT4G33290.1	32.372	0	0
AT5G41500	AT5G41500.1	22.402	1.4e-5	7.22e-4
AT5G41510	AT5G41510.1	26.846	1e-6	7.5e-5
AT5G23960	AT5G23960.1	0	1	1
AT5G23960	AT5G23960.2	0	1	1
AT1G22340	AT1G22340.1	0	1	1
AT1G22360	AT1G22360.1	0	1	1
AT1G22360	AT1G22360.2	0	1	1
AT1G22380	AT1G22380.1	0	1	1
AT1G22400	AT1G22400.1	0	1	1
AT3G27473	AT3G27473.1	16.548	2.55e-4	0.007496
AT3G27473	AT3G27473.2	8.411	0.014912	0.175262
AT3G27473	AT3G27473.3	12.011	0.002465	0.046288
AT3G27473	AT3G27473.4	8.411	0.014912	0.175262
AT3G27480	AT3G27480.2	7.177	0.027633	0.273119
AT3G27500	AT3G27500.1	7.767	0.020575	0.220528
AT3G27500	AT3G27500.2	6.383	0.041114	0.358019
AT3G27500	AT3G27500.3	12.141	0.00231	0.044028
AT3G27510	AT3G27510.1	6.91	0.031587	0.3004
AT3G27510	AT3G27510.2	0.082	0.960046	1
AT3G28650	AT3G28650.1	1.1	0.57681	1
AT3G45530	AT3G45530.1	8.391	0.015062	0.176689
AT5G42840	AT5G42840.1	8.038	0.017971	0.20030800000000001
AT5G42840	AT5G42840.2	4.179	0.123746	0.748511
AT5G17590	AT5G17590.1	0	1	1
AT3G01310	AT3G01310.1	0	1	1
AT3G01310	AT3G01310.2	0	1	1
AT3G01310	AT3G01310.3	0	1	1
AT5G15070	AT5G15070.1	0	1	1
AT5G15070	AT5G15070.4	0	1	1
AT5G15070	AT5G15070.5	0	1	1
AT2G36160	AT2G36160.1	0.911	0.634224	1
AT3G11510	AT3G11510.1	0	1	1
AT3G52580	AT3G52580.1	-1.338	1	1
AT4G11810	AT4G11810.2	0	1	1
AT4G11810	AT4G11810.3	0	1	1
AT4G22990	AT4G22990.1	0	1	1
AT4G22990	AT4G22990.2	0	1	1
AT4G22990	AT4G22990.3	0	1	1
AT1G66530	AT1G66530.1	3.009	0.222149	1
AT4G26300	AT4G26300.1	1.209	0.546361	1
AT4G26300	AT4G26300.2	1.209	0.546361	1
AT4G26300	AT4G26300.3	1.209	0.546361	1
AT4G26300	AT4G26300.4	1.209	0.546361	1
AT4G26300	AT4G26300.5	1.209	0.546361	1
AT1G02840	AT1G02840.1	0	1	1
AT1G02840	AT1G02840.2	0	1	1
AT1G02840	AT1G02840.3	2.319	0.313674	1
AT1G02840	AT1G02840.4	2.319	0.313674	1
AT1G02840	AT1G02840.5	2.319	0.313674	1
AT4G02430	AT4G02430.1	0	1	1
AT4G02430	AT4G02430.2	21.763	1.9e-5	9.36e-4
AT4G02430	AT4G02430.3	28.566	1e-6	7.5e-5
AT4G02430	AT4G02430.4	70.322	0	0
AT4G00893	AT4G00893.1	0.545	0.761658	1
AT4G10660	AT4G10660.1	0	1	1
AT4G10695	AT4G10695.1	0.228	0.892461	1
AT4G10695	AT4G10695.2	0.228	0.892461	1
AT4G10700	AT4G10700.1	0	1	1
AT4G12370	AT4G12370.1	5.501	0.063909	0.479841
AT5G02170	AT5G02170.1	0.482	0.785773	1
AT2G42950	AT2G42950.1	13.536	0.00115	0.025506
AT2G42950	AT2G42950.2	13.536	0.00115	0.025506
AT3G58820	AT3G58820.1	20.47	3.6e-5	0.001554
AT3G59000	AT3G59000.1	4.947	0.084279	0.58011
AT3G59000	AT3G59000.2	5.066	0.079437	0.557264
AT5G38390	AT5G38390.1	20.036	4.5e-5	0.001858
AT5G38396	AT5G38396.1	24.829	4e-6	2.49e-4
AT1G73270	AT1G73270.1	3.625	0.163236	0.892844
AT1G73270	AT1G73270.2	3.625	0.163236	0.892844
AT1G73280	AT1G73280.1	1.927	0.381503	1
AT1G73280	AT1G73280.2	0	1	1
AT1G73280	AT1G73280.3	0	1	1
AT1G73280	AT1G73280.4	0	1	1
AT1G73300	AT1G73300.1	6.588	0.037102	0.332655
AT1G73300	AT1G73300.2	6.588	0.037102	0.332655
AT1G73310	AT1G73310.1	2.343	0.30989	1
AT1G73310	AT1G73310.2	14.394	7.49e-4	0.018069000000000002
AT1G73310	AT1G73310.3	4.087	0.129591	0.770696
AT5G36180	AT5G36180.1	0	0.999933	1
AT5G36180	AT5G36180.2	31.481	0	0
AT5G36180	AT5G36180.3	0.493	0.781587	1
AT5G36180	AT5G36180.4	26.151	2e-6	1.36e-4
AT5G36180	AT5G36180.5	0.493	0.781587	1
AT4G01760	AT4G01760.1	21.896	1.8e-5	8.92e-4
AT4G01910	AT4G01910.1	38.298	0	0
AT4G01920	AT4G01920.1	20.128	4.3e-5	0.001798
AT4G01930	AT4G01930.1	36.133	0	0
AT4G11540	AT4G11540.1	14.396	7.48e-4	0.018057
AT4G11550	AT4G11550.1	14.845	5.98e-4	0.015073
AT5G66600	AT5G66600.1	0.978	0.613339	1
AT5G66600	AT5G66600.10	0.305	0.85847	1
AT5G66600	AT5G66600.11	0	0.9998	1
AT5G66600	AT5G66600.12	0.95	0.621933	1
AT5G66600	AT5G66600.13	0.95	0.621933	1
AT5G66600	AT5G66600.14	0.978	0.613339	1
AT5G66600	AT5G66600.15	0.534	0.765593	1
AT5G66600	AT5G66600.2	0.679	0.712297	1
AT5G66600	AT5G66600.3	0.978	0.613339	1
AT5G66600	AT5G66600.4	0.978	0.613339	1
AT5G66600	AT5G66600.5	0.305	0.85847	1
AT5G66600	AT5G66600.6	0.95	0.621933	1
AT5G66600	AT5G66600.7	1.507	0.47063	1
AT5G66600	AT5G66600.8	0.305	0.85847	1
AT5G66600	AT5G66600.9	0.978	0.613339	1
AT3G31430	AT3G31430.1	0	1	1
AT1G05420	AT1G05420.1	0	1	1
AT1G05420	AT1G05420.2	0.266	0.87546	1
AT3G47090	AT3G47090.1	0.007	0.996721	1
AT3G47570	AT3G47570.1	0	1	1
AT3G47580	AT3G47580.1	6.789	0.03356	0.312206
AT3G11910	AT3G11910.1	0	1	1
AT3G11910	AT3G11910.2	0	1	1
AT3G11910	AT3G11910.3	0	1	1
AT3G11910	AT3G11910.4	0	1	1
AT5G06600	AT5G06600.1	0	1	1
AT5G06600	AT5G06600.2	0.048	0.976097	1
AT4G31480	AT4G31480.1	0	1	1
AT4G31480	AT4G31480.2	0	1	1
AT4G31480	AT4G31480.3	0	1	1
AT4G31480	AT4G31480.4	0	1	1
AT4G31480	AT4G31480.5	0	1	1
AT4G31480	AT4G31480.6	0	1	1
AT4G31480	AT4G31480.7	0	1	1
AT4G31480	AT4G31480.8	0	1	1
AT4G31480	AT4G31480.9	0	1	1
AT4G31490	AT4G31490.1	0	1	1
AT4G31490	AT4G31490.2	0	1	1
AT4G31490	AT4G31490.3	0	1	1
AT2G06265	AT2G06265.1	0	1	1
AT2G07505	AT2G07505.1	0.065	0.967998	1
AT1G54270	AT1G54270.1	0	1	1
AT1G72730	AT1G72730.1	0	1	1
AT3G13920	AT3G13920.1	0	1	1
AT5G55100	AT5G55100.1	0	1	1
AT5G55100	AT5G55100.10	0	1	1
AT5G55100	AT5G55100.11	0	1	1
AT5G55100	AT5G55100.12	0	1	1
AT5G55100	AT5G55100.2	0	1	1
AT5G55100	AT5G55100.3	0	1	1
AT5G55100	AT5G55100.4	0	1	1
AT5G55100	AT5G55100.5	0	1	1
AT5G55100	AT5G55100.6	0	1	1
AT5G55100	AT5G55100.7	0	1	1
AT5G55100	AT5G55100.8	0	1	1
AT5G55100	AT5G55100.9	0	1	1
AT1G37150	AT1G37150.1	0	1	1
AT1G37150	AT1G37150.2	0	1	1
AT1G37150	AT1G37150.3	0	1	1
AT1G37150	AT1G37150.4	0	1	1
AT1G37150	AT1G37150.5	0	1	1
AT1G37150	AT1G37150.6	0	1	1
AT1G37150	AT1G37150.7	0	1	1
AT1G37150	AT1G37150.8	0	1	1
AT1G37150	AT1G37150.9	0	1	1
AT2G25710	AT2G25710.1	0	1	1
AT2G25710	AT2G25710.2	0	1	1
AT2G25710	AT2G25710.3	0.112	0.945615	1
AT2G25710	AT2G25710.4	0	1	1
AT2G25710	AT2G25710.5	0	1	1
AT2G25710	AT2G25710.6	0	1	1
AT2G25710	AT2G25710.7	0	1	1
AT2G25710	AT2G25710.8	0.112	0.945615	1
AT1G70380	AT1G70380.1	26.912	1e-6	7.5e-5
AT1G70390	AT1G70390.1	52.166	0	0
AT1G70960	AT1G70960.1	34.334	0	0
AT1G70970	AT1G70970.1	50.391	0	0
AT1G71290	AT1G71290.1	13.942	9.39e-4	0.021681
AT1G66610	AT1G66610.1	18.211	1.11e-4	0.003827
AT1G66610	AT1G66610.2	5.693	0.058036	0.450692
AT1G66620	AT1G66620.1	4.884	0.086982	0.590343
AT1G66630	AT1G66630.1	3.198	0.202051	1
AT1G15930	AT1G15930.1	0	1	1
AT1G15930	AT1G15930.2	0	1	1
AT2G32060	AT2G32060.1	0	1	1
AT2G32060	AT2G32060.2	0	1	1
AT2G32060	AT2G32060.3	0	1	1
AT2G43500	AT2G43500.1	1.48	0.477108	1
AT2G43500	AT2G43500.10	1.48	0.477108	1
AT2G43500	AT2G43500.11	1.48	0.477108	1
AT2G43500	AT2G43500.2	1.508	0.470506	1
AT2G43500	AT2G43500.3	1.48	0.477108	1
AT2G43500	AT2G43500.4	1.48	0.477108	1
AT2G43500	AT2G43500.5	1.48	0.477108	1
AT2G43500	AT2G43500.6	1.48	0.477108	1
AT2G43500	AT2G43500.7	1.48	0.477108	1
AT2G43500	AT2G43500.8	1.48	0.477108	1
AT2G43500	AT2G43500.9	1.48	0.477108	1
AT3G16230	AT3G16230.1	0	1	1
AT3G16230	AT3G16230.10	0	1	1
AT3G16230	AT3G16230.11	0	1	1
AT3G16230	AT3G16230.12	0	1	1
AT3G16230	AT3G16230.13	0	1	1
AT3G16230	AT3G16230.2	0	1	1
AT3G16230	AT3G16230.3	0	1	1
AT3G16230	AT3G16230.4	0	1	1
AT3G16230	AT3G16230.5	-0.031	1	1
AT3G16230	AT3G16230.6	0	1	1
AT3G16230	AT3G16230.7	0	1	1
AT3G16230	AT3G16230.8	0	1	1
AT3G16230	AT3G16230.9	0	1	1
AT2G43490	AT2G43490.1	2.943	0.229598	1
AT2G43490	AT2G43490.2	2.943	0.229598	1
AT2G43490	AT2G43490.3	2.943	0.229598	1
AT2G43490	AT2G43490.4	2.943	0.229598	1
AT2G43490	AT2G43490.5	3.093	0.212981	1
AT2G43490	AT2G43490.6	2.927	0.231482	1
AT2G43490	AT2G43490.7	2.943	0.229598	1
AT2G43490	AT2G43490.8	2.927	0.231482	1
AT2G36360	AT2G36360.1	0	1	1
AT2G36360	AT2G36360.2	0	1	1
AT2G36360	AT2G36360.3	0	1	1
AT2G36360	AT2G36360.5	0	1	1
AT1G10820	AT1G10820.1	0.175	0.916247	1
AT1G10820	AT1G10820.2	0.347	0.840772	1
AT4G29760	AT4G29760.1	3.251	0.196814	1
AT4G29760	AT4G29760.2	3.251	0.196814	1
AT4G29770	AT4G29770.1	5.298	0.070717	0.515629
AT4G29770	AT4G29770.2	5.298	0.070717	0.515629
AT5G66310	AT5G66310.1	3.37	0.185438	0.960913
AT5G66310	AT5G66310.2	3.37	0.185438	0.960913
AT5G66310	AT5G66310.3	3.37	0.185438	0.960913
AT4G17310	AT4G17310.1	0.002	0.998979	1
AT4G17310	AT4G17310.10	0	1	1
AT4G17310	AT4G17310.11	0.002	0.998957	1
AT4G17310	AT4G17310.12	0	1	1
AT4G17310	AT4G17310.13	0.002	0.998979	1
AT4G17310	AT4G17310.14	0	1	1
AT4G17310	AT4G17310.15	0.321	0.851817	1
AT4G17310	AT4G17310.16	0	1	1
AT4G17310	AT4G17310.17	0	1	1
AT4G17310	AT4G17310.2	4.036	0.13293	0.782159
AT4G17310	AT4G17310.3	0	1	1
AT4G17310	AT4G17310.4	0	1	1
AT4G17310	AT4G17310.5	0	1	1
AT4G17310	AT4G17310.6	0	1	1
AT4G17310	AT4G17310.7	0	1	1
AT4G17310	AT4G17310.8	0	1	1
AT4G17310	AT4G17310.9	0	1	1
AT1G07170	AT1G07170.1	0.001	0.999287	1
AT1G07170	AT1G07170.2	0.001	0.999263	1
AT1G07170	AT1G07170.3	0.001	0.999287	1
AT1G07170	AT1G07170.4	0.001	0.999263	1
AT1G07170	AT1G07170.5	0.001	0.999287	1
AT1G07170	AT1G07170.6	0.001	0.999263	1
AT2G30000	AT2G30000.1	0.002	0.999106	1
AT3G46000	AT3G46000.1	0	1	1
AT3G46000	AT3G46000.2	0	1	1
AT3G46000	AT3G46000.3	0	1	1
AT3G46010	AT3G46010.1	0.001	0.99958	1
AT5G59880	AT5G59880.1	0	0.999898	1
AT5G59880	AT5G59880.2	0	0.999889	1
AT5G59890	AT5G59890.1	0.001	0.999667	1
AT3G45060	AT3G45060.1	0	1	1
AT5G60780	AT5G60780.1	0	1	1
AT2G04390	AT2G04390.1	5.514	0.063492	0.478063
AT2G05220	AT2G05220.1	5.45	0.065536	0.488108
AT2G05220	AT2G05220.2	5.45	0.065536	0.488108
AT3G10610	AT3G10610.1	0	1	1
AT5G04800	AT5G04800.1	6.418	0.040391	0.353605
AT5G04800	AT5G04800.2	6.418	0.040391	0.353605
AT5G04800	AT5G04800.3	6.418	0.040391	0.353605
AT5G04800	AT5G04800.4	6.418	0.040391	0.353605
AT1G19910	AT1G19910.1	0	1	1
AT2G16510	AT2G16510.1	0.001	0.999359	1
AT4G34720	AT4G34720.1	0.001	0.999473	1
AT4G38920	AT4G38920.1	0.002	0.998889	1
AT3G25460	AT3G25460.1	25.982	2e-6	1.36e-4
AT3G49980	AT3G49980.1	8.807	0.012235	0.152334
AT3G49980	AT3G49980.2	8.807	0.012235	0.152334
AT5G47300	AT5G47300.1	11.9	0.002606	0.048276
AT3G50430	AT3G50430.1	13.72	0.001049	0.023719
AT3G50430	AT3G50430.2	6.999	0.030218	0.291431
AT3G14650	AT3G14650.1	0	1	1
AT3G14660	AT3G14660.1	0	1	1
AT3G14660	AT3G14660.2	0	1	1
AT3G14680	AT3G14680.1	0	1	1
AT3G14690	AT3G14690.1	0	1	1
AT3G14690	AT3G14690.2	0	1	1
AT5G07940	AT5G07940.1	6.627	0.036394	0.329168
AT5G07940	AT5G07940.2	6.627	0.036394	0.329168
AT5G07940	AT5G07940.3	6.627	0.036394	0.329168
AT5G07940	AT5G07940.4	6.627	0.036394	0.329168
AT5G07940	AT5G07940.5	6.627	0.036394	0.329168
AT5G07970	AT5G07970.1	19.784	5.1e-5	0.002065
AT5G07970	AT5G07970.2	19.784	5.1e-5	0.002065
AT5G07970	AT5G07970.3	19.784	5.1e-5	0.002065
AT5G07980	AT5G07980.1	0.698	0.70544	1
AT5G07980	AT5G07980.2	0.698	0.70544	1
AT4G05350	AT4G05350.1	1.36	0.506531	1
AT4G12140	AT4G12140.1	17.799	1.36e-4	0.004488
AT4G12150	AT4G12150.1	2.618	0.270109	1
AT4G12190	AT4G12190.1	0.481	0.786279	1
AT4G12210	AT4G12210.1	0.06	0.970392	1
AT4G12220	AT4G12220.1	1.175	0.555625	1
AT2G28760	AT2G28760.1	0.4	0.818798	1
AT2G28760	AT2G28760.2	0	1	1
AT2G28760	AT2G28760.3	0	1	1
AT3G46440	AT3G46440.1	0	1	1
AT3G46440	AT3G46440.2	0	1	1
AT5G59290	AT5G59290.1	0	1	1
AT1G62900	AT1G62900.1	0	1	1
AT1G63140	AT1G63140.1	0	1	1
AT1G63140	AT1G63140.2	0.042	0.979218	1
AT1G63140	AT1G63140.3	0	1	1
AT1G63140	AT1G63140.4	0.05	0.975404	1
AT1G77520	AT1G77520.1	0.713	0.700195	1
AT1G77530	AT1G77530.1	0	1	1
AT1G77530	AT1G77530.2	0	1	1
AT2G30650	AT2G30650.1	0	1	1
AT2G30650	AT2G30650.2	0.022	0.988881	1
AT2G30660	AT2G30660.1	0.038	0.981309	1
AT2G30660	AT2G30660.2	0	1	1
AT5G65940	AT5G65940.1	1.148	0.563319	1
AT5G65940	AT5G65940.4	1.148	0.563319	1
AT5G18770	AT5G18770.1	1.251	0.535006	1
AT5G18770	AT5G18770.2	12.341	0.00209	0.040976
AT5G18780	AT5G18780.1	2.876	0.237406	1
AT5G18780	AT5G18780.2	2.876	0.237406	1
AT5G18780	AT5G18780.3	5.492	0.064177	0.481075
AT5G18780	AT5G18780.4	5.492	0.064177	0.481075
AT5G60170	AT5G60170.1	1.954	0.376413	1
AT5G60170	AT5G60170.2	1.862	0.394101	1
AT5G52040	AT5G52040.1	0	1	1
AT5G52040	AT5G52040.2	0	1	1
AT5G52040	AT5G52040.3	0	1	1
AT5G52040	AT5G52040.4	0	1	1
AT5G52040	AT5G52040.5	0	1	1
AT5G52040	AT5G52040.6	0	1	1
AT5G52040	AT5G52040.7	0	1	1
AT1G43080	AT1G43080.1	0	1	1
AT1G43090	AT1G43090.1	0	1	1
AT1G43100	AT1G43100.1	0	1	1
AT2G15450	AT2G15450.1	0	1	1
AT2G15460	AT2G15460.1	0	1	1
AT2G15470	AT2G15470.1	0	1	1
AT2G26620	AT2G26620.1	0	1	1
AT2G40310	AT2G40310.1	0	1	1
AT4G13760	AT4G13760.1	0	1	1
AT3G24870	AT3G24870.1	2.179	0.336364	1
AT3G24870	AT3G24870.2	2.713	0.257532	1
AT3G24870	AT3G24870.3	2.179	0.336364	1
AT3G24870	AT3G24870.4	3.475	0.175966	0.931726
AT3G24880	AT3G24880.1	2.227	0.328362	1
AT3G24880	AT3G24880.2	2.33	0.311868	1
AT3G24880	AT3G24880.3	2.33	0.311868	1
AT2G05160	AT2G05160.1	0	1	1
AT2G05160	AT2G05160.2	0	1	1
AT2G05160	AT2G05160.3	0.047	0.976857	1
AT1G23720	AT1G23720.3	1.135	0.56686	1
AT3G28550	AT3G28550.1	0.004	0.998183	1
AT3G28550	AT3G28550.2	0	0.999997	1
AT3G54580	AT3G54580.1	0	1	1
AT3G54590	AT3G54590.1	2.912	0.233155	1
AT3G54590	AT3G54590.2	2.912	0.233155	1
AT3G54590	AT3G54590.3	6.205	0.044931	0.380346
AT1G31420	AT1G31420.1	0	1	1
AT1G31420	AT1G31420.2	0	1	1
AT1G31420	AT1G31420.3	0	1	1
AT2G35620	AT2G35620.1	5.617	0.060293	0.463182
AT2G35620	AT2G35620.2	5.617	0.060293	0.463182
AT2G35620	AT2G35620.3	5.617	0.060293	0.463182
AT2G35620	AT2G35620.4	5.617	0.060293	0.463182
AT2G41790	AT2G41790.1	0.369	0.831444	1
AT3G57470	AT3G57470.2	0	1	1
AT2G32700	AT2G32700.1	0	1	1
AT2G32700	AT2G32700.2	0	1	1
AT2G32700	AT2G32700.3	0	1	1
AT2G32700	AT2G32700.4	0	1	1
AT2G32700	AT2G32700.5	0	1	1
AT2G32700	AT2G32700.6	0	1	1
AT2G32700	AT2G32700.7	0	1	1
AT2G30480	AT2G30480.1	5.355	0.068748	0.50527
AT2G30480	AT2G30480.10	5.107	0.07779	0.549294
AT2G30480	AT2G30480.11	6.365	0.041479	0.360579
AT2G30480	AT2G30480.12	6.61	0.036695	0.331245
AT2G30480	AT2G30480.13	8.065	0.017731	0.198767
AT2G30480	AT2G30480.2	8.065	0.017731	0.198767
AT2G30480	AT2G30480.3	5.107	0.07779	0.549294
AT2G30480	AT2G30480.4	6.61	0.036695	0.331245
AT2G30480	AT2G30480.5	5.107	0.07779	0.549294
AT2G30480	AT2G30480.6	5.33	0.069594	0.510162
AT2G30480	AT2G30480.7	16.661	2.41e-4	0.007135
AT2G30480	AT2G30480.8	16.661	2.41e-4	0.007135
AT2G30480	AT2G30480.9	5.355	0.068748	0.50527
AT3G19780	AT3G19780.1	0.862	0.649941	1
AT3G19780	AT3G19780.2	0.641	0.725923	1
AT3G19780	AT3G19780.3	0.188	0.910059	1
AT3G19780	AT3G19780.4	0.453	0.797193	1
AT5G28910	AT5G28910.1	6.34	0.042008	0.363522
AT5G28910	AT5G28910.2	0	1	1
AT5G28960	AT5G28960.1	0	1	1
AT1G33080	AT1G33080.1	0	1	1
AT1G33080	AT1G33080.2	36.88	0	0
AT1G33090	AT1G33090.1	0	1	1
AT1G33110	AT1G33110.1	0	1	1
AT1G09195	AT1G09195.1	0	1	1
AT1G09195	AT1G09195.10	0	1	1
AT1G09195	AT1G09195.11	0	1	1
AT1G09195	AT1G09195.12	0	1	1
AT1G09195	AT1G09195.13	0	1	1
AT1G09195	AT1G09195.14	0	1	1
AT1G09195	AT1G09195.15	0	1	1
AT1G09195	AT1G09195.2	0	1	1
AT1G09195	AT1G09195.3	0	1	1
AT1G09195	AT1G09195.4	0	1	1
AT1G09195	AT1G09195.5	0	1	1
AT1G09195	AT1G09195.6	0	1	1
AT1G09195	AT1G09195.7	0	1	1
AT1G09195	AT1G09195.8	0	1	1
AT1G09195	AT1G09195.9	3.463	0.17702	0.934422
AT2G17780	AT2G17780.1	0	1	1
AT2G17780	AT2G17780.10	0	1	1
AT2G17780	AT2G17780.2	0	1	1
AT2G17780	AT2G17780.3	0.867	0.648398	1
AT2G17780	AT2G17780.4	0	1	1
AT2G17780	AT2G17780.5	0	1	1
AT2G17780	AT2G17780.6	0	1	1
AT2G17780	AT2G17780.7	0	1	1
AT2G17780	AT2G17780.8	0	1	1
AT2G17780	AT2G17780.9	0.867	0.648398	1
AT1G45063	AT1G45063.1	2.463	0.29188	1
AT1G45063	AT1G45063.2	0	1	1
AT4G01380	AT4G01380.1	7.032	0.029722	0.288079
AT1G04750	AT1G04750.1	0.001	0.999556	1
AT1G04760	AT1G04760.1	0.47	0.790516	1
AT1G04760	AT1G04760.2	0.47	0.790516	1
AT2G33120	AT2G33120.1	0	1	1
AT1G51060	AT1G51060.1	0	1	1
AT3G20670	AT3G20670.1	0	1	1
AT4G27230	AT4G27230.1	0.029	0.98559	1
AT4G27230	AT4G27230.2	0.029	0.98559	1
AT5G54640	AT5G54640.1	0	1	1
AT4G19630	AT4G19630.1	1.306	0.520519	1
AT5G22770	AT5G22770.1	0	1	1
AT5G22770	AT5G22770.2	0	1	1
AT5G22770	AT5G22770.3	0	1	1
AT5G22770	AT5G22770.4	0	1	1
AT5G22770	AT5G22770.5	0	1	1
AT5G22770	AT5G22770.6	0	1	1
AT5G22780	AT5G22780.1	0	1	1
AT5G22780	AT5G22780.2	0	1	1
AT5G22150	AT5G22150.1	7.953	0.018754	0.206924
AT5G22150	AT5G22150.2	4.534	0.103617	0.664782
AT5G22160	AT5G22160.1	0.529	0.767517	1
AT5G22170	AT5G22170.1	10.833	0.004443	0.071411
AT1G66200	AT1G66200.1	0	0.999975	1
AT3G17820	AT3G17820.1	0	1	1
AT5G16570	AT5G16570.1	0	1	1
AT5G37600	AT5G37600.1	0.001	0.999315	1
AT5G08570	AT5G08570.1	1.557	0.459168	1
AT5G08570	AT5G08570.2	1.557	0.459168	1
AT5G08570	AT5G08570.3	0	1	1
AT5G63680	AT5G63680.1	0	1	1
AT5G63680	AT5G63680.2	0	1	1
AT5G63680	AT5G63680.3	0	1	1
AT5G04550	AT5G04550.1	0	1	1
AT5G04550	AT5G04550.2	0	1	1
AT2G39390	AT2G39390.1	0.189	0.909696	1
AT3G09500	AT3G09500.1	0	1	1
AT3G55170	AT3G55170.1	0	1	1
AT3G55170	AT3G55170.2	0	1	1
AT3G55170	AT3G55170.5	0	1	1
AT5G02610	AT5G02610.1	0.005	0.997667	1
AT2G21660	AT2G21660.1	26.489	2e-6	1.36e-4
AT2G21660	AT2G21660.2	1.325	0.515454	1
AT2G21690	AT2G21690.1	4.066	0.130912	0.774876
AT4G39260	AT4G39260.1	7.205	0.027257	0.270226
AT4G39260	AT4G39260.2	8.676	0.013064	0.159986
AT4G39260	AT4G39260.3	2.955	0.228232	1
AT4G39260	AT4G39260.4	2.914	0.232964	1
AT1G65790	AT1G65790.1	0.124	0.939748	1
AT1G65790	AT1G65790.2	0.001	0.999573	1
AT1G65790	AT1G65790.3	0.001	0.999573	1
AT1G65800	AT1G65800.1	1.395	0.497754	1
AT1G65800	AT1G65800.2	1.482	0.476642	1
AT4G21380	AT4G21380.1	0	1	1
AT4G21380	AT4G21380.2	0	1	1
AT3G21960	AT3G21960.1	9.047	0.010852	0.139031
AT3G22040	AT3G22040.1	2.81	0.245399	1
AT3G22050	AT3G22050.1	4.352	0.113511	0.707595
AT4G08400	AT4G08400.2	5.903	0.052254	0.419932
AT4G08400	AT4G08400.3	3.612	0.164295	0.896128
AT4G08410	AT4G08410.1	2.679	0.261916	1
AT4G08410	AT4G08410.2	4.071	0.13063	0.773776
AT4G13390	AT4G13390.1	0	1	1
AT4G13390	AT4G13390.2	0.021	0.989423	1
AT4G13390	AT4G13390.3	0	1	1
AT5G35190	AT5G35190.1	1.102	0.576422	1
AT5G35190	AT5G35190.2	1.147	0.563626	1
AT1G56330	AT1G56330.1	-63.184	1	1
AT3G62560	AT3G62560.1	0.001	0.999647	1
AT4G02080	AT4G02080.1	0	1	1
AT1G35150	AT1G35150.1	0.516	0.772439	1
AT2G06500	AT2G06500.1	0	1	1
AT3G29638	AT3G29638.1	-5.003	1	1
AT4G10200	AT4G10200.1	0	1	1
AT4G10200	AT4G10200.2	0	1	1
AT5G38670	AT5G38670.1	11.681	0.002907	0.052598
AT5G38680	AT5G38680.1	13.212	0.001352	0.0291
AT5G51250	AT5G51250.1	14.071	8.8e-4	0.020497
AT1G56650	AT1G56650.1	2.262	0.322734	1
AT1G66370	AT1G66370.1	2.414	0.299049	1
AT1G66390	AT1G66390.1	0	1	1
AT5G45980	AT5G45980.1	0	1	1
AT2G02570	AT2G02570.1	1.924	0.382077	1
AT2G02570	AT2G02570.2	1.924	0.382077	1
AT2G02570	AT2G02570.3	0.843	0.656184	1
AT2G02570	AT2G02570.4	1.924	0.382077	1
AT5G11250	AT5G11250.1	18.456	9.8e-5	0.003472
AT5G11250	AT5G11250.2	18.456	9.8e-5	0.003472
AT5G11250	AT5G11250.3	18.456	9.8e-5	0.003472
AT1G29910	AT1G29910.1	0.002	0.999115	1
AT1G29920	AT1G29920.1	0.002	0.999081	1
AT1G29930	AT1G29930.1	0.002	0.999119	1
AT2G34420	AT2G34420.1	0.003	0.998727	1
AT2G34430	AT2G34430.1	0	1	1
AT2G36750	AT2G36750.1	0.074	0.963488	1
AT2G36770	AT2G36770.1	16.106	3.18e-4	0.009054
AT2G36780	AT2G36780.1	10.591	0.005013	0.078137
AT2G36790	AT2G36790.1	0.279	0.869797	1
AT2G36800	AT2G36800.1	0	1	1
AT2G37975	AT2G37975.1	0	0.999828	1
AT2G37975	AT2G37975.2	0	0.999828	1
AT2G47380	AT2G47380.1	0	1	1
AT2G47380	AT2G47380.2	0	1	1
AT3G62400	AT3G62400.1	0	1	1
AT5G61310	AT5G61310.1	0	0.999892	1
AT5G61310	AT5G61310.2	0	0.999892	1
AT5G61310	AT5G61310.3	0	0.999892	1
AT5G61310	AT5G61310.4	0	0.999892	1
AT5G61310	AT5G61310.5	0	0.999892	1
AT5G61310	AT5G61310.6	0	0.999892	1
AT2G29150	AT2G29150.1	2.947	0.229179	1
AT2G29290	AT2G29290.1	0.672	0.714532	1
AT2G29290	AT2G29290.2	1.252	0.53486	1
AT2G29350	AT2G29350.1	1.159	0.560278	1
AT2G29350	AT2G29350.3	0.655	0.720581	1
AT2G29370	AT2G29370.1	0	1	1
AT2G04790	AT2G04790.1	6.398	0.040812	0.356198
AT2G04790	AT2G04790.10	0	1	1
AT2G04790	AT2G04790.11	0.02	0.990035	1
AT2G04790	AT2G04790.12	0.002	0.998929	1
AT2G04790	AT2G04790.13	6.398	0.040812	0.356198
AT2G04790	AT2G04790.14	6.398	0.040812	0.356198
AT2G04790	AT2G04790.15	0	1	1
AT2G04790	AT2G04790.16	0	1	1
AT2G04790	AT2G04790.2	0	1	1
AT2G04790	AT2G04790.3	0.002	0.998929	1
AT2G04790	AT2G04790.4	0.002	0.998929	1
AT2G04790	AT2G04790.5	0	1	1
AT2G04790	AT2G04790.6	0	1	1
AT2G04790	AT2G04790.7	0.02	0.990035	1
AT2G04790	AT2G04790.8	0.02	0.990035	1
AT2G04790	AT2G04790.9	0.002	0.998929	1
AT2G05440	AT2G05440.1	20.066	4.4e-5	0.001827
AT2G05440	AT2G05440.2	20.376	3.8e-5	0.001622
AT2G05440	AT2G05440.3	20.902	2.9e-5	0.001305
AT2G05440	AT2G05440.4	21.251	2.4e-5	0.001127
AT2G05440	AT2G05440.5	20.902	2.9e-5	0.001305
AT2G05440	AT2G05440.6	8.718	0.012789	0.157646
AT2G05440	AT2G05440.7	8.921	0.011558	0.145368
AT2G05440	AT2G05440.8	10.047	0.006581	0.095782
AT2G05440	AT2G05440.9	20.376	3.8e-5	0.001622
AT2G05510	AT2G05510.1	0	1	1
AT2G05510	AT2G05510.2	0	1	1
AT2G05510	AT2G05510.3	0	1	1
AT2G05510	AT2G05510.4	10.464	0.005342	0.082006
AT2G05510	AT2G05510.5	0	1	1
AT2G05510	AT2G05510.6	0	1	1
AT3G62740	AT3G62740.1	0	1	1
AT3G62740	AT3G62740.2	0.18	0.913927	1
AT3G62750	AT3G62750.5	3.423	0.180624	0.945202
AT3G62750	AT3G62750.6	3.423	0.180624	0.945202
AT4G27820	AT4G27820.1	1.481	0.476945	1
AT4G27820	AT4G27820.2	0	1	1
AT4G27820	AT4G27820.3	0	1	1
AT4G27830	AT4G27830.1	4.503	0.105224	0.672019
AT4G27830	AT4G27830.2	0	1	1
AT1G15750	AT1G15750.1	1.803	0.405924	1
AT1G15750	AT1G15750.2	1.803	0.405924	1
AT1G15750	AT1G15750.3	1.803	0.405924	1
AT1G15750	AT1G15750.4	1.803	0.405924	1
AT1G80490	AT1G80490.1	0	1	1
AT1G80490	AT1G80490.2	0	1	1
AT1G80490	AT1G80490.3	0	1	1
AT1G20920	AT1G20920.1	2.54	0.2808	1
AT1G20920	AT1G20920.2	5.547	0.062429	0.474031
AT1G20920	AT1G20920.3	2.54	0.2808	1
AT1G20920	AT1G20920.4	2.54	0.2808	1
AT1G20920	AT1G20920.5	2.54	0.2808	1
AT1G20920	AT1G20920.6	2.54	0.2808	1
AT1G20920	AT1G20920.7	2.54	0.2808	1
AT1G29840	AT1G29840.1	0.121	0.941476	1
AT2G19550	AT2G19550.1	0	1	1
AT3G47560	AT3G47560.1	0	1	1
AT3G47560	AT3G47560.2	0	1	1
AT3G47560	AT3G47560.3	0	1	1
AT3G47560	AT3G47560.4	0	1	1
AT3G47560	AT3G47560.5	0	1	1
AT3G47590	AT3G47590.1	0	1	1
AT3G47590	AT3G47590.2	0	1	1
AT5G17890	AT5G17890.1	23.945	6e-6	3.54e-4
AT5G45050	AT5G45050.1	69.555	0	0
AT5G45050	AT5G45050.2	69.415	0	0
AT5G45050	AT5G45050.3	50.588	0	0
AT5G45050	AT5G45050.4	67.786	0	0
AT5G45260	AT5G45260.1	125.994	0	0
AT5G45260	AT5G45260.2	20.626	3.3e-5	0.00146
AT5G45260	AT5G45260.3	20.626	3.3e-5	0.00146
AT5G03480	AT5G03480.1	18.238	1.1e-4	0.003803
AT5G03495	AT5G03495.1	7.845	0.019787	0.214372
AT1G01100	AT1G01100.1	1.959	0.375503	1
AT1G01100	AT1G01100.2	1.959	0.375503	1
AT1G01100	AT1G01100.3	4.434	0.108961	0.688831
AT1G01100	AT1G01100.4	1.959	0.375503	1
AT4G00810	AT4G00810.1	0	1	1
AT4G00810	AT4G00810.2	0	1	1
AT5G47700	AT5G47700.1	9.359	0.009286	0.123397
AT5G47700	AT5G47700.2	9.359	0.009286	0.123397
AT1G03290	AT1G03290.1	17.719	1.42e-4	0.004633
AT1G03290	AT1G03290.2	17.719	1.42e-4	0.004633
AT1G03290	AT1G03290.3	17.719	1.42e-4	0.004633
AT1G03290	AT1G03290.4	17.719	1.42e-4	0.004633
AT1G03290	AT1G03290.5	17.233	1.81e-4	0.005666
AT1G03290	AT1G03290.6	15.993	3.37e-4	0.009479
AT5G51930	AT5G51930.1	0.558	0.756523	1
AT5G51930	AT5G51930.2	0.552	0.758946	1
AT5G51950	AT5G51950.1	0	1	1
AT5G51950	AT5G51950.2	0	1	1
AT5G51950	AT5G51950.3	0	1	1
AT4G25740	AT4G25740.1	0	1	1
AT4G25740	AT4G25740.2	2.542	0.280591	1
AT5G41520	AT5G41520.1	5.093	0.078348	0.551974
AT5G41520	AT5G41520.2	6.651	0.035959	0.327067
AT5G52650	AT5G52650.1	0	1	1
AT5G52750	AT5G52750.1	0	1	1
AT5G52750	AT5G52750.2	0.178	0.914868	1
AT5G52760	AT5G52760.1	8.033	0.018018	0.200772
AT5G52760	AT5G52760.2	7.867	0.019576	0.212769
AT5G25120	AT5G25120.1	0	1	1
AT5G25130	AT5G25130.1	0	1	1
AT5G25180	AT5G25180.1	0	1	1
AT3G54910	AT3G54910.1	16.902	2.14e-4	0.006475
AT3G54910	AT3G54910.2	16.902	2.14e-4	0.006475
AT3G54910	AT3G54910.3	16.902	2.14e-4	0.006475
AT5G57020	AT5G57020.1	0	1	1
AT1G35850	AT1G35850.1	9.652	0.008017	0.110859
AT1G35850	AT1G35850.2	9.451	0.008865	0.119454
AT5G59280	AT5G59280.1	35.465	0	0
AT5G60110	AT5G60110.1	0.001	0.999311	1
AT5G60180	AT5G60180.1	0.125	0.93926	1
AT5G13220	AT5G13220.1	0	1	1
AT5G13220	AT5G13220.2	0	1	1
AT5G13220	AT5G13220.3	0	1	1
AT5G13220	AT5G13220.4	0	1	1
AT5G13220	AT5G13220.5	0	1	1
AT5G13220	AT5G13220.6	0	1	1
AT5G13220	AT5G13220.7	0	1	1
AT5G12440	AT5G12440.1	2.013	0.36555	1
AT5G12440	AT5G12440.10	1.832	0.400045	1
AT5G12440	AT5G12440.11	2.013	0.36555	1
AT5G12440	AT5G12440.12	2.013	0.36555	1
AT5G12440	AT5G12440.2	2.013	0.36555	1
AT5G12440	AT5G12440.3	1.832	0.400045	1
AT5G12440	AT5G12440.4	2.013	0.36555	1
AT5G12440	AT5G12440.5	1.832	0.400045	1
AT5G12440	AT5G12440.6	1.832	0.400045	1
AT5G12440	AT5G12440.7	2.013	0.36555	1
AT5G12440	AT5G12440.8	1.832	0.400045	1
AT5G12440	AT5G12440.9	2.013	0.36555	1
AT1G53360	AT1G53360.1	7.914	0.019123	0.209377
AT1G53360	AT1G53360.2	6.525	0.038298	0.340419
AT1G53370	AT1G53370.1	8.198	0.016588	0.189618
AT1G53370	AT1G53370.2	12.017	0.002458	0.046231
AT4G35110	AT4G35110.1	1.664	0.435109	1
AT4G35110	AT4G35110.2	1.664	0.435109	1
AT4G35110	AT4G35110.3	1.664	0.435109	1
AT4G35110	AT4G35110.4	1.664	0.435109	1
AT4G35110	AT4G35110.5	1.664	0.435109	1
AT4G35110	AT4G35110.6	1.664	0.435109	1
AT4G33260	AT4G33260.1	0	1	1
AT4G33270	AT4G33270.1	0	1	1
AT2G42740	AT2G42740.1	0.003	0.998367	1
AT3G58700	AT3G58700.1	0.003	0.998508	1
AT4G18730	AT4G18730.1	0.003	0.998513	1
AT5G45775	AT5G45775.2	0.003	0.998519	1
AT3G18100	AT3G18100.1	3.784	0.150793	0.846868
AT3G18100	AT3G18100.2	3.773	0.151584	0.849255
AT3G18100	AT3G18100.3	8.715	0.01281	0.157837
AT3G18100	AT3G18100.4	3.773	0.151584	0.849255
AT2G47610	AT2G47610.1	0	1	1
AT3G62870	AT3G62870.1	0	1	1
AT4G15670	AT4G15670.1	0	1	1
AT4G15680	AT4G15680.1	0.001	0.999667	1
AT4G15690	AT4G15690.1	0.001	0.999572	1
AT4G15700	AT4G15700.1	0	1	1
AT3G51270	AT3G51270.2	2.261	0.32286	1
AT3G49430	AT3G49430.1	0.002	0.99925	1
AT3G49430	AT3G49430.2	7.245	0.026711	0.266521
AT3G49430	AT3G49430.3	0.002	0.99925	1
AT3G49430	AT3G49430.4	0.002	0.99925	1
AT3G49430	AT3G49430.5	0.002	0.99925	1
AT3G49430	AT3G49430.6	0	1	1
AT3G49430	AT3G49430.7	0.002	0.99925	1
AT3G48270	AT3G48270.1	0	1	1
AT3G48280	AT3G48280.1	8.603	0.013548	0.163315
AT3G48300	AT3G48300.1	0	1	1
AT3G48300	AT3G48300.2	0	0.999998	1
AT3G48310	AT3G48310.1	0	1	1
AT2G29880	AT2G29880.1	0	1	1
AT5G28820	AT5G28820.1	1.746	0.417657	1
AT3G21900	AT3G21900.1	8.181	0.016732	0.190619
AT3G21900	AT3G21900.2	7.005	0.030127	0.290836
AT3G21910	AT3G21910.1	0	1	1
AT3G21920	AT3G21920.1	2.578	0.275521	1
AT3G21920	AT3G21920.2	2.16	0.339666	1
AT3G21930	AT3G21930.1	2.418	0.298484	1
AT5G11180	AT5G11180.1	0	1	1
AT5G11180	AT5G11180.2	0.069	0.966141	1
AT5G11210	AT5G11210.1	0	1	1
AT5G11210	AT5G11210.10	0	1	1
AT5G11210	AT5G11210.2	0	1	1
AT5G11210	AT5G11210.3	0	1	1
AT5G11210	AT5G11210.4	0	1	1
AT5G11210	AT5G11210.5	0	1	1
AT5G11210	AT5G11210.6	0	1	1
AT5G11210	AT5G11210.7	0	1	1
AT5G11210	AT5G11210.8	0	1	1
AT5G11210	AT5G11210.9	0	1	1
AT5G13320	AT5G13320.1	0.04	0.980018	1
AT5G13320	AT5G13320.2	0.04	0.980018	1
AT5G13320	AT5G13320.3	0	1	1
AT2G16740	AT2G16740.1	0	1	1
AT5G56150	AT5G56150.1	0	1	1
AT2G27315	AT2G27315.1	0	1	1
AT5G52965	AT5G52965.1	0	1	1
AT5G52975	AT5G52975.1	0	1	1
AT1G66880	AT1G66880.1	0	1	1
AT1G66880	AT1G66880.2	8.288	0.015857	0.183809
AT1G66880	AT1G66880.3	0	1	1
AT1G80245	AT1G80245.1	0	1	1
AT1G80245	AT1G80245.2	0	1	1
AT1G80245	AT1G80245.3	0	1	1
AT1G80245	AT1G80245.4	0.113	0.945275	1
AT1G80245	AT1G80245.5	0.113	0.945275	1
AT1G80245	AT1G80245.6	0.113	0.945275	1
AT1G80245	AT1G80245.7	0	1	1
AT4G00695	AT4G00695.1	0	1	1
AT4G00695	AT4G00695.2	0	1	1
AT4G00695	AT4G00695.3	11.713	0.002861	0.05191
AT4G00695	AT4G00695.4	11.713	0.002861	0.05191
AT4G00695	AT4G00695.5	0	1	1
AT1G43730	AT1G43730.1	0	0.999999	1
AT4G04650	AT4G04650.1	0	1	1
AT5G16486	AT5G16486.1	0	1	1
AT5G43360	AT5G43360.1	1.341	0.511527	1
AT5G45500	AT5G45500.1	13.043	0.001471	0.030944
AT5G45500	AT5G45500.2	13.043	0.001471	0.030944
AT5G45500	AT5G45500.3	13.043	0.001471	0.030944
AT5G45500	AT5G45500.4	13.043	0.001471	0.030944
AT5G45500	AT5G45500.5	13.043	0.001471	0.030944
AT5G45500	AT5G45500.6	13.043	0.001471	0.030944
AT5G45500	AT5G45500.7	13.043	0.001471	0.030944
AT5G45500	AT5G45500.8	13.043	0.001471	0.030944
AT5G45500	AT5G45500.9	13.043	0.001471	0.030944
AT3G26020	AT3G26020.1	0	1	1
AT3G26020	AT3G26020.2	0	1	1
AT3G26020	AT3G26020.3	0	1	1
AT3G26020	AT3G26020.4	0	1	1
AT3G26020	AT3G26020.5	0	1	1
AT3G26020	AT3G26020.6	0	1	1
AT3G26020	AT3G26020.7	0	1	1
AT3G26020	AT3G26020.8	0	1	1
AT3G07110	AT3G07110.1	0	1	1
AT3G24830	AT3G24830.1	0	1	1
AT4G13170	AT4G13170.1	0	1	1
AT5G48760	AT5G48760.1	0	1	1
AT5G48760	AT5G48760.2	0	1	1
AT5G24270	AT5G24270.1	0	1	1
AT5G24270	AT5G24270.2	0	1	1
AT5G24270	AT5G24270.3	0	1	1
AT5G24270	AT5G24270.4	0	1	1
AT5G24270	AT5G24270.5	0	1	1
AT2G37060	AT2G37060.1	0.001	0.999595	1
AT2G37060	AT2G37060.2	0.001	0.999595	1
AT2G37060	AT2G37060.3	0.001	0.999595	1
AT3G53340	AT3G53340.1	0	1	1
AT3G53340	AT3G53340.5	0	1	1
AT2G38780	AT2G38780.1	2.003	0.367331	1
AT2G38780	AT2G38780.10	0.319	0.852709	1
AT2G38780	AT2G38780.11	3.606	0.164768	0.897521
AT2G38780	AT2G38780.12	1.491	0.474594	1
AT2G38780	AT2G38780.13	3.606	0.164768	0.897521
AT2G38780	AT2G38780.2	1.23	0.540714	1
AT2G38780	AT2G38780.3	3.606	0.164768	0.897521
AT2G38780	AT2G38780.4	2.003	0.367331	1
AT2G38780	AT2G38780.5	1.491	0.474594	1
AT2G38780	AT2G38780.6	2.075	0.354385	1
AT2G38780	AT2G38780.7	3.606	0.164768	0.897521
AT2G38780	AT2G38780.8	3.606	0.164768	0.897521
AT2G38780	AT2G38780.9	3.606	0.164768	0.897521
AT2G43240	AT2G43240.1	0	1	1
AT3G59360	AT3G59360.1	0	1	1
AT3G59360	AT3G59360.2	0	1	1
AT5G37890	AT5G37890.1	1.646	0.439123	1
AT5G37910	AT5G37910.1	7.984	0.018461	0.204176
AT2G20950	AT2G20950.1	1.279	0.527446	1
AT2G20950	AT2G20950.10	0.936	0.626357	1
AT2G20950	AT2G20950.11	1.55	0.46064	1
AT2G20950	AT2G20950.12	10.761	0.004606	0.073348
AT2G20950	AT2G20950.13	0.935	0.626636	1
AT2G20950	AT2G20950.14	0	1	1
AT2G20950	AT2G20950.2	1.365	0.505358	1
AT2G20950	AT2G20950.3	0.001	0.999645	1
AT2G20950	AT2G20950.4	0.003	0.998409	1
AT2G20950	AT2G20950.5	1.838	0.398891	1
AT2G20950	AT2G20950.6	0	1	1
AT2G20950	AT2G20950.7	1.149	0.562901	1
AT2G20950	AT2G20950.8	1.279	0.527446	1
AT2G20950	AT2G20950.9	1.838	0.398891	1
AT3G11620	AT3G11620.1	0	1	1
AT3G11620	AT3G11620.2	0	1	1
AT3G11620	AT3G11620.3	0	1	1
AT3G11620	AT3G11620.4	0	1	1
AT3G11620	AT3G11620.5	0	1	1
AT3G11620	AT3G11620.6	0	1	1
AT3G11620	AT3G11620.7	0	1	1
AT3G11620	AT3G11620.8	0	1	1
AT3G11620	AT3G11620.9	0	1	1
AT1G55490	AT1G55490.1	0	1	1
AT1G55490	AT1G55490.2	0	1	1
AT1G55490	AT1G55490.3	0	1	1
AT1G55490	AT1G55490.4	0	1	1
AT1G55490	AT1G55490.5	0	1	1
AT3G13470	AT3G13470.1	0	1	1
AT4G15300	AT4G15300.1	0	1	1
AT4G15300	AT4G15300.2	0	1	1
AT4G15300	AT4G15300.3	0	1	1
AT4G15393	AT4G15393.1	0	1	1
AT4G15393	AT4G15393.2	0	1	1
AT4G15393	AT4G15393.3	0	1	1
AT4G15396	AT4G15396.1	0.958	0.619301	1
AT4G15396	AT4G15396.2	1.026	0.598779	1
AT4G15396	AT4G15396.3	5.762	0.056086	0.440432
AT4G15396	AT4G15396.4	0	1	1
AT2G47640	AT2G47640.1	0.002	0.999055	1
AT2G47640	AT2G47640.2	0.002	0.999029	1
AT2G47640	AT2G47640.3	0.002	0.999029	1
AT2G47640	AT2G47640.4	0.002	0.999055	1
AT3G62840	AT3G62840.1	0.002	0.999122	1
AT3G62840	AT3G62840.2	0.002	0.999004	1
AT2G36060	AT2G36060.1	0	1	1
AT2G36060	AT2G36060.2	0	1	1
AT3G52560	AT3G52560.1	3.105	0.211731	1
AT3G52560	AT3G52560.2	4.891	0.0867	0.589061
AT4G13810	AT4G13810.1	21.657	2e-5	9.77e-4
AT4G13810	AT4G13810.2	13.375	0.001246	0.027341
AT4G13810	AT4G13810.3	33.284	0	0
AT4G13820	AT4G13820.1	2.556	0.278638	1
AT4G13880	AT4G13880.1	14.104	8.66e-4	0.020307
AT5G38410	AT5G38410.1	0	1	1
AT5G38410	AT5G38410.2	0	1	1
AT5G38410	AT5G38410.3	0	1	1
AT5G38430	AT5G38430.1	0	1	1
AT5G38430	AT5G38430.2	0	1	1
AT5G37415	AT5G37415.1	-0.078	1	1
AT5G37415	AT5G37415.2	-0.078	1	1
AT5G38740	AT5G38740.1	0	1	1
AT5G39750	AT5G39750.1	0	1	1
AT5G39810	AT5G39810.1	0	1	1
AT5G40070	AT5G40070.1	0.77	0.680389	1
AT5G40120	AT5G40120.1	0	1	1
AT5G40220	AT5G40220.1	0	1	1
AT5G41200	AT5G41200.1	0	1	1
AT1G06070	AT1G06070.1	0	1	1
AT2G31370	AT2G31370.1	3.889	0.143057	0.817393
AT2G31370	AT2G31370.2	3.889	0.143057	0.817393
AT2G31370	AT2G31370.3	3.889	0.143057	0.817393
AT2G31370	AT2G31370.4	3.889	0.143057	0.817393
AT2G31370	AT2G31370.5	2.376	0.304809	1
AT2G31370	AT2G31370.6	3.889	0.143057	0.817393
AT2G31370	AT2G31370.7	3.889	0.143057	0.817393
AT2G33490	AT2G33490.1	0.235	0.889177	1
AT2G33490	AT2G33490.2	0.235	0.889177	1
AT2G33490	AT2G33490.3	0.268	0.874796	1
AT2G42455	AT2G42455.1	5.207	0.074028	0.531897
AT2G42480	AT2G42480.1	36.113	0	0
AT1G30400	AT1G30400.1	0	1	1
AT1G30400	AT1G30400.2	0	1	1
AT2G34660	AT2G34660.1	0	1	1
AT2G34660	AT2G34660.2	0	1	1
AT2G34660	AT2G34660.3	0	1	1
AT1G04600	AT1G04600.1	14.524	7.02e-4	0.017159
AT2G33240	AT2G33240.1	3.008	0.222235	1
AT2G33240	AT2G33240.2	0.855	0.652092	1
AT2G33240	AT2G33240.3	0.892	0.640032	1
AT2G33240	AT2G33240.4	0.881	0.643755	1
AT2G33240	AT2G33240.5	3.778	0.1512	0.848127
AT2G33240	AT2G33240.6	0.881	0.643755	1
AT2G33240	AT2G33240.7	2.661	0.264319	1
AT2G33240	AT2G33240.8	2.661	0.264319	1
AT3G09120	AT3G09120.1	0.001	0.999516	1
AT1G18760	AT1G18760.1	8.589	0.013644	0.164365
AT1G18770	AT1G18770.1	8.279	0.015929	0.184482
AT3G13228	AT3G13228.1	0.273	0.872257	1
AT1G20260	AT1G20260.1	1.554	0.459831	1
AT1G76030	AT1G76030.1	0	1	1
AT4G38510	AT4G38510.1	0	1	1
AT4G38510	AT4G38510.2	0	1	1
AT4G38510	AT4G38510.3	0	1	1
AT4G38510	AT4G38510.4	0	1	1
AT3G46650	AT3G46650.1	0.639	0.72636	1
AT3G46690	AT3G46690.1	0	1	1
AT3G46700	AT3G46700.1	4.309	0.115942	0.71733
AT3G46720	AT3G46720.1	0	1	1
AT5G65440	AT5G65440.1	4.928	0.085105	0.582233
AT5G65440	AT5G65440.3	4.928	0.085105	0.582233
AT5G65440	AT5G65440.4	4.928	0.085105	0.582233
AT5G65440	AT5G65440.6	4.928	0.085105	0.582233
AT5G65440	AT5G65440.7	4.928	0.085105	0.582233
AT5G65440	AT5G65440.8	4.928	0.085105	0.582233
AT5G65440	AT5G65440.9	4.928	0.085105	0.582233
AT2G18010	AT2G18010.1	0	1	1
AT5G47480	AT5G47480.1	0	1	1
AT5G47480	AT5G47480.2	0.002	0.998782	1
AT5G47490	AT5G47490.1	11.596	0.003034	0.054234
AT5G47490	AT5G47490.2	11.596	0.003034	0.054234
AT5G47490	AT5G47490.3	9.353	0.009311	0.12364
AT1G27170	AT1G27170.1	18.719	8.6e-5	0.003143
AT1G27170	AT1G27170.2	8.68	0.013034	0.159712
AT1G27180	AT1G27180.1	4.059	0.131376	0.776602
AT1G27180	AT1G27180.2	2.83	0.242923	1
AT1G27180	AT1G27180.3	3.313	0.19076099999999999	0.979338
AT1G27180	AT1G27180.4	4.416	0.10994	0.692191
AT1G27180	AT1G27180.5	4.059	0.131376	0.776602
AT1G27180	AT1G27180.6	4.416	0.10994	0.692191
AT1G27180	AT1G27180.7	4.416	0.10994	0.692191
AT1G27180	AT1G27180.8	4.059	0.131376	0.776602
AT1G05710	AT1G05710.1	0	1	1
AT1G05710	AT1G05710.11	0	1	1
AT1G05710	AT1G05710.12	0	1	1
AT1G05710	AT1G05710.14	0	1	1
AT1G05710	AT1G05710.3	0	1	1
AT1G05710	AT1G05710.4	0	1	1
AT1G05710	AT1G05710.5	0	1	1
AT1G05710	AT1G05710.6	0	1	1
AT5G61190	AT5G61190.1	3.704	0.156934	0.86913
AT5G61190	AT5G61190.10	3.481	0.175448	0.929647
AT5G61190	AT5G61190.11	1.667	0.434491	1
AT5G61190	AT5G61190.2	1.117	0.57209	1
AT5G61190	AT5G61190.3	5.901	0.052302	0.420045
AT5G61190	AT5G61190.4	1.117	0.57209	1
AT5G61190	AT5G61190.5	3.308	0.191239	0.981114
AT5G61190	AT5G61190.6	3.38	0.184517	0.957745
AT5G61190	AT5G61190.7	5.901	0.052302	0.420045
AT5G61190	AT5G61190.8	2.486	0.288526	1
AT5G61190	AT5G61190.9	10.617	0.00495	0.077448
AT3G56320	AT3G56320.1	0	1	1
AT3G56320	AT3G56320.2	0	1	1
AT3G56320	AT3G56320.3	0	1	1
AT3G56320	AT3G56320.4	0	1	1
AT3G56320	AT3G56320.5	0	1	1
AT3G56320	AT3G56320.6	0	1	1
AT3G56320	AT3G56320.7	0	1	1
AT1G03060	AT1G03060.1	11.145	0.003801	0.063944
AT1G03060	AT1G03060.2	12.099	0.002359	0.0448
AT1G03060	AT1G03060.3	11.394	0.003355	0.058072
AT1G03060	AT1G03060.4	10.332	0.005709	0.085711
AT4G02660	AT4G02660.2	6.597	0.036934	0.332111
AT1G04270	AT1G04270.1	0	1	1
AT5G09490	AT5G09490.1	0	1	1
AT5G09500	AT5G09500.1	0	1	1
AT5G09510	AT5G09510.1	0.023	0.988426	1
AT5G43640	AT5G43640.1	0	1	1
AT1G05870	AT1G05870.1	4.783	0.091488	0.610271
AT1G05870	AT1G05870.10	4.783	0.091488	0.610271
AT1G05870	AT1G05870.11	4.783	0.091488	0.610271
AT1G05870	AT1G05870.12	4.783	0.091488	0.610271
AT1G05870	AT1G05870.2	4.783	0.091488	0.610271
AT1G05870	AT1G05870.3	4.783	0.091488	0.610271
AT1G05870	AT1G05870.4	4.783	0.091488	0.610271
AT1G05870	AT1G05870.5	4.783	0.091488	0.610271
AT1G05870	AT1G05870.6	4.783	0.091488	0.610271
AT1G05870	AT1G05870.7	4.783	0.091488	0.610271
AT1G05870	AT1G05870.8	4.783	0.091488	0.610271
AT1G05870	AT1G05870.9	4.783	0.091488	0.610271
AT1G47610	AT1G47610.1	0	1	1
AT2G07760	AT2G07760.1	0	1	1
AT1G60280	AT1G60280.1	10.417	0.005471	0.083011
AT1G60300	AT1G60300.1	11.232	0.00364	0.061965
AT1G60340	AT1G60340.1	15.187	5.04e-4	0.013058
AT1G60350	AT1G60350.1	3.797	0.149761	0.842552
AT1G60380	AT1G60380.1	17.528	1.56e-4	0.005023
AT2G19750	AT2G19750.1	0.001	0.999442	1
AT4G29390	AT4G29390.1	0.001	0.999395	1
AT5G56670	AT5G56670.1	0.001	0.99939	1
AT5G58140	AT5G58140.1	0.73	0.694161	1
AT5G58140	AT5G58140.2	0.73	0.694161	1
AT5G58140	AT5G58140.3	0.418	0.811578	1
AT5G58140	AT5G58140.5	0.73	0.694161	1
AT5G58140	AT5G58140.6	0.73	0.694161	1
AT5G58140	AT5G58140.7	0.73	0.694161	1
AT5G58350	AT5G58350.1	0	1	1
AT2G28720	AT2G28720.1	0	1	1
AT3G45980	AT3G45980.1	0	1	1
AT3G46030	AT3G46030.1	0.102	0.950093	1
AT5G59910	AT5G59910.1	0	1	1
AT3G03780	AT3G03780.1	0	1	1
AT3G03780	AT3G03780.2	0	1	1
AT3G03780	AT3G03780.3	0	1	1
AT5G17920	AT5G17920.1	2.184	0.335533	1
AT5G17920	AT5G17920.2	2.184	0.335533	1
AT3G03080	AT3G03080.1	0	1	1
AT5G16970	AT5G16970.1	4.922	0.085365	0.583582
AT5G17000	AT5G17000.1	0.89	0.640911	1
AT2G25520	AT2G25520.1	0	1	1
AT4G32390	AT4G32390.1	0	1	1
AT5G11230	AT5G11230.1	0.125	0.939578	1
AT5G25400	AT5G25400.1	0	1	1
AT5G06265	AT5G06265.1	0.889	0.641018	1
AT5G06265	AT5G06265.10	0.889	0.641018	1
AT5G06265	AT5G06265.2	0.889	0.641018	1
AT5G06265	AT5G06265.3	0.889	0.641018	1
AT5G06265	AT5G06265.4	0.889	0.641018	1
AT5G06265	AT5G06265.5	0.889	0.641018	1
AT5G06265	AT5G06265.6	0.889	0.641018	1
AT5G06265	AT5G06265.7	0.889	0.641018	1
AT5G06265	AT5G06265.8	0.889	0.641018	1
AT5G06265	AT5G06265.9	0.889	0.641018	1
AT1G12350	AT1G12350.1	1.329	0.514511	1
AT1G12350	AT1G12350.2	1.329	0.514511	1
AT5G02080	AT5G02080.1	0.53	0.76739	1
AT5G02080	AT5G02080.2	11.101	0.003885	0.065121
AT5G02080	AT5G02080.3	0	1	1
AT5G02080	AT5G02080.4	4.516	0.104553	0.669053
AT5G02080	AT5G02080.5	5.095	0.078275	0.551565
AT5G02080	AT5G02080.6	6.633	0.036287	0.329168
AT5G02080	AT5G02080.7	5.524	0.063172	0.476885
AT2G17390	AT2G17390.1	0	1	1
AT4G35450	AT4G35450.1	0.063	0.968778	1
AT4G35450	AT4G35450.2	0.063	0.968778	1
AT4G35450	AT4G35450.3	0.063	0.968778	1
AT4G35450	AT4G35450.4	0	1	1
AT4G35450	AT4G35450.5	0	1	1
AT2G17320	AT2G17320.1	0	1	1
AT2G17320	AT2G17320.2	0	1	1
AT2G17340	AT2G17340.1	0	1	1
AT4G35360	AT4G35360.1	0	1	1
AT4G35360	AT4G35360.2	0	1	1
AT4G35360	AT4G35360.3	0.248	0.883341	1
AT4G33240	AT4G33240.1	5.796	0.055141	0.434573
AT4G33240	AT4G33240.2	2.67	0.263179	1
AT4G33240	AT4G33240.3	5.815	0.05462	0.432764
AT4G33240	AT4G33240.4	2.644	0.266583	1
AT4G33240	AT4G33240.5	5.557	0.062124	0.472555
AT4G33240	AT4G33240.6	5.815	0.054613	0.432764
AT4G33240	AT4G33240.7	5.815	0.054613	0.432764
AT4G32420	AT4G32420.1	12.333	0.002098	0.040976
AT4G32420	AT4G32420.2	14.49	7.14e-4	0.017395
AT4G32420	AT4G32420.3	12.333	0.002098	0.040976
AT4G32420	AT4G32420.4	12.205	0.002238	0.043165
AT4G32420	AT4G32420.5	12.333	0.002098	0.040976
AT4G32420	AT4G32420.6	12.333	0.002098	0.040976
AT1G06390	AT1G06390.1	0.103	0.949946	1
AT1G06390	AT1G06390.2	0.103	0.949946	1
AT2G30980	AT2G30980.1	0	1	1
AT4G18710	AT4G18710.1	0.003	0.998698	1
AT4G19990	AT4G19990.1	0	1	1
AT4G19990	AT4G19990.2	0	1	1
AT4G19990	AT4G19990.3	0	1	1
AT4G19990	AT4G19990.4	0	1	1
AT4G19990	AT4G19990.5	0	1	1
AT4G19990	AT4G19990.6	0	1	1
AT4G19990	AT4G19990.7	0	1	1
AT4G21903	AT4G21903.1	0	1	1
AT4G21903	AT4G21903.2	0	1	1
AT4G21910	AT4G21910.1	0.136	0.934414	1
AT4G21910	AT4G21910.2	0.375	0.82883	1
AT4G21910	AT4G21910.3	0.136	0.934414	1
AT4G21910	AT4G21910.4	0.375	0.82883	1
AT3G45860	AT3G45860.1	0	1	1
AT4G23240	AT4G23240.2	0	1	1
AT3G52840	AT3G52840.1	0	1	1
AT3G52840	AT3G52840.2	0	1	1
AT4G26140	AT4G26140.1	0	1	1
AT5G56870	AT5G56870.1	0	1	1
AT1G43005	AT1G43005.1	3.114	0.210748	1
AT1G53550	AT1G53550.1	15.421	4.48e-4	0.011992
AT1G53815	AT1G53815.1	6.078	0.047885	0.396316
AT1G55070	AT1G55070.1	10.021	0.006669	0.096533
AT1G61060	AT1G61060.1	15.022	5.47e-4	0.013997
AT1G62500	AT1G62500.1	0.26	0.87804	1
AT2G10940	AT2G10940.1	4.397	0.11095	0.695601
AT2G10940	AT2G10940.2	4.397	0.11095	0.695601
AT4G15160	AT4G15160.1	0	1	1
AT4G15160	AT4G15160.2	0	1	1
AT3G13810	AT3G13810.1	0.007	0.996551	1
AT3G13810	AT3G13810.2	0.005	0.997649	1
AT3G13810	AT3G13810.3	0	0.999984	1
AT3G13810	AT3G13810.4	0.007	0.996551	1
AT3G13810	AT3G13810.5	0.007	0.996551	1
AT3G13810	AT3G13810.6	0.007	0.996551	1
AT3G09840	AT3G09840.1	0.002	0.999203	1
AT3G53230	AT3G53230.1	0	1	1
AT5G03340	AT5G03340.1	0	1	1
AT3G02080	AT3G02080.1	0	1	1
AT5G15520	AT5G15520.1	0.02	0.990099	1
AT5G61170	AT5G61170.1	0.001	0.999711	1
AT5G59670	AT5G59670.1	44.017	0	0
AT5G59670	AT5G59670.2	44.017	0	0
AT5G56800	AT5G56800.1	15.495	4.32e-4	0.011665
AT1G75830	AT1G75830.1	0	1	1
AT2G26010	AT2G26010.1	2.974	0.226065	1
AT2G26020	AT2G26020.1	2.049	0.35899	1
AT5G44420	AT5G44420.1	1.259	0.532911	1
AT5G44430	AT5G44430.1	3.949	0.138805	0.802734
AT4G11970	AT4G11970.1	0.06	0.970439	1
AT4G11970	AT4G11970.2	4.092	0.129249	0.769648
AT4G11970	AT4G11970.3	5.005	0.081887	0.569132
AT4G11970	AT4G11970.4	0.06	0.970439	1
AT4G11970	AT4G11970.5	2.913	0.232996	1
AT4G11970	AT4G11970.6	2.051	0.358627	1
AT4G11970	AT4G11970.7	5.899	0.052359	0.420356
AT2G02060	AT2G02060.1	19.608	5.5e-5	0.002182
AT2G02060	AT2G02060.2	19.608	5.5e-5	0.002182
AT2G02060	AT2G02060.3	23.942	6e-6	3.54e-4
AT3G28345	AT3G28345.1	0	1	1
AT3G28380	AT3G28380.1	0	1	1
AT3G28390	AT3G28390.1	0	1	1
AT5G26000	AT5G26000.1	13.108	0.001424	0.030368
AT5G26000	AT5G26000.2	7.921	0.019055	0.209011
AT5G55550	AT5G55550.1	0	1	1
AT5G55550	AT5G55550.10	0	1	1
AT5G55550	AT5G55550.11	0	1	1
AT5G55550	AT5G55550.2	0	1	1
AT5G55550	AT5G55550.3	0	1	1
AT5G55550	AT5G55550.4	0	1	1
AT5G55550	AT5G55550.5	0	1	1
AT5G55550	AT5G55550.6	0	1	1
AT5G55550	AT5G55550.7	0	1	1
AT5G55550	AT5G55550.8	0	1	1
AT5G55550	AT5G55550.9	0	1	1
AT2G41540	AT2G41540.1	0	1	1
AT2G41540	AT2G41540.2	0	1	1
AT2G41540	AT2G41540.3	0	1	1
AT2G41540	AT2G41540.4	0	1	1
AT1G14490	AT1G14490.1	2.817	0.24453	1
AT1G14490	AT1G14490.2	6.271	0.043487	0.370913
AT5G49700	AT5G49700.1	0.086	0.957893	1
AT4G12020	AT4G12020.1	122.386	0	0
AT4G12020	AT4G12020.10	122.386	0	0
AT4G12020	AT4G12020.11	144.227	0	0
AT4G12020	AT4G12020.2	122.386	0	0
AT4G12020	AT4G12020.3	122.386	0	0
AT4G12020	AT4G12020.4	122.386	0	0
AT4G12020	AT4G12020.5	126.228	0	0
AT4G12020	AT4G12020.6	122.386	0	0
AT4G12020	AT4G12020.7	115.613	0	0
AT4G12020	AT4G12020.8	122.386	0	0
AT4G12020	AT4G12020.9	122.386	0	0
AT4G24230	AT4G24230.1	18.71	8.7e-5	0.003164
AT4G24230	AT4G24230.2	18.606	9.1e-5	0.003277
AT4G24230	AT4G24230.3	18.606	9.1e-5	0.003277
AT4G24230	AT4G24230.4	18.606	9.1e-5	0.003277
AT4G24230	AT4G24230.5	18.606	9.1e-5	0.003277
AT4G24230	AT4G24230.6	17.923	1.28e-4	0.004266
AT4G30990	AT4G30990.1	17.663	1.46e-4	0.004743
AT4G30990	AT4G30990.2	17.609	1.5e-4	0.004855
AT4G30990	AT4G30990.3	17.781	1.38e-4	0.004538
AT1G52940	AT1G52940.1	0	1	1
AT1G56360	AT1G56360.1	0	1	1
AT2G18130	AT2G18130.1	0	1	1
AT4G36350	AT4G36350.1	0	1	1
[truncated: 35,129 more rows]

## Sheet: 3. M2a-M1a data for L2 DE genes
p_val	avg_log2FC	pct.1	pct.2	p_val_adj	cluster	gene	symbol	timepoint	isoform	M2a_vs_M1a_LRT	M2a_vs_M1a_pval	M2a_vs_M1a_padj	isoform_num
0	11.44491982513997	0.569	0.001	0	MCE	AT1G29600	NA	3 DAP	AT1G29600.1	19.275	6.5e-5	0.002501	1
0	10.162214943523205	0.266	0	0	MCE	AT4G23090	NA	3 DAP	AT4G23090.1	20.526	3.5e-5	0.001532	1
0	9.320440911026207	0.327	0	0	MCE	AT2G01560	NA	3 DAP	NA	NA	NA	NA	NA
0	9.210927354464326	0.269	0.001	0	MCE	AT2G19220	NA	3 DAP	NA	NA	NA	NA	NA
0	9.149603347775622	0.408	0.003	0	MCE	AT1G34170	ARF13	3 DAP	NA	NA	NA	NA	NA
0	9.02715	0.17	0	0	MCE	AT1G43960	NA	3 DAP	NA	NA	NA	NA	NA
0	8.526307805897119	0.486	0.005	0	MCE	AT2G19510	LBD8	3 DAP	NA	NA	NA	NA	NA
0	8.466291577653394	0.391	0.002	0	MCE	AT1G09550	AtPAE1	3 DAP	AT1G09550.1	0.156	0.924761	1	1
0	8.406283474257313	0.265	0.001	0	MCE	AT4G10210	NA	3 DAP	AT4G10210.1	3.557	0.168854	0.908091	1
0	8.376481390850682	0.145	0.001	0	MCE	AT1G34410	ARF21	3 DAP	NA	NA	NA	NA	NA
0	8.354719732592162	0.166	0.001	0	MCE	AT1G68210	APRR6,PRR6	3 DAP	AT1G68210.1	0.8	0.670453	1	1
0	8.352846980687758	0.265	0.002	0	MCE	AT1G36000	LBD5	3 DAP	NA	NA	NA	NA	NA
0	8.328909046813553	0.208	0.001	0	MCE	AT3G27785	ATMYB118,MYB118,PGA37	3 DAP	AT3G27785.1	0	1	1	1
0	8.197825729734554	0.219	0.001	0	MCE	AT2G12900	bZIP33	3 DAP	AT2G12900.1	1.161	0.559685	1	1
0	8.076173696099055	0.456	0.003	0	MCE	AT1G62340	ALE,ALE1	3 DAP	AT1G62340.1	0	1	1	1
0	8.028966030035205	0.092	0	0	MCE	AT2G21455	NA	3 DAP	NA	NA	NA	NA	NA
0	8.004084174083122	0.464	0.004	0	MCE	AT2G30090	NA	3 DAP	AT2G30090.1	0	1	1	1
0	7.844776781191759	0.447	0.002	0	MCE	AT1G78460	cHBP3	3 DAP	AT1G78460.1	0	1	1	1
0	7.771298564351856	0.567	0.008	0	MCE	AT1G22015	DD46,GALT8	3 DAP	AT1G22015.1	1.628	0.443118	1	1
0	7.731402758420597	0.265	0.001	0	MCE	AT2G15660	AGL95	3 DAP	AT2G15660.1	1.019	0.600789	1	1
0	7.634603449032418	0.207	0.002	0	MCE	AT1G35540	ARF14	3 DAP	NA	NA	NA	NA	NA
0	7.613579471507517	0.464	0.004	0	MCE	AT3G46860	NA	3 DAP	NA	NA	NA	NA	NA
0	7.605793922551701	0.145	0.001	0	MCE	AT2G13115	NA	3 DAP	NA	NA	NA	NA	NA
0	7.519208485639805	0.626	0.017	0	MCE	AT5G46810	NA	3 DAP	AT5G46810.1	11.182	0.003731	0.063074	1
0	7.4783585714336835	0.264	0.003	0	MCE	AT1G43220	NA	3 DAP	NA	NA	NA	NA	NA
0	7.469333990633033	0.12	0.001	0	MCE	AT2G25295	LCR81	3 DAP	AT2G25295.1	5.277	0.071453	0.518754	1
0	7.423746721101232	0.267	0.002	0	MCE	AT5G52610	NA	3 DAP	AT5G52610.1	4.014	0.134361	0.786714	1
0	7.381004167158903	0.321	0.002	0	MCE	AT5G42640	GAL2	3 DAP	AT5G42640.1	2.595	0.273274	1	1
0	7.371645385585129	0.343	0.006	0	MCE	AT1G43200	NA	3 DAP	NA	NA	NA	NA	NA
0	7.361647065208101	0.078	0	0	MCE	AT3G43350	NA	3 DAP	NA	NA	NA	NA	NA
0	7.261794226665354	0.14	0.001	0	MCE	AT5G19710	NA	3 DAP	AT5G19710.1	1.96	0.375298	1	1
0	7.207194428819848	0.128	0.001	0	MCE	AT2G02497	NA	3 DAP	NA	NA	NA	NA	NA
0	7.182297075862252	0.308	0.002	0	MCE	AT5G35900	LBD35	3 DAP	NA	NA	NA	NA	NA
0	7.181005950959271	0.314	0.002	0	MCE	AT4G20160	NA	3 DAP	AT4G20160.1	18.531	9.5e-5	0.003388	1
0	7.15514	0.219	0.001	0	MCE	AT2G17090	BSK12,SSP	3 DAP	AT2G17090.1	2.789	0.247952	1	1
0	7.1449365172073644	0.207	0.001	0	MCE	AT1G02820	AtLEA3,LEA2,LEA3	3 DAP	AT1G02820.1	0	1	1	1
0	7.140586783151438	0.158	0.001	0	MCE	AT4G40020	NA	3 DAP	AT4G40020.1	0	1	1	1
0	7.110387322426442	0.177	0.002	0	MCE	AT1G34310	ARF12	3 DAP	NA	NA	NA	NA	NA
0	7.082168268934817	0.231	0.001	0	MCE	AT5G03580	NA	3 DAP	AT5G03580.1	0.465	0.792672	1	1
0	6.995965102524419	0.439	0.005	0	MCE	AT4G30070	LCR59	3 DAP	AT4G30070.1	1.662	0.435603	1	1
0	6.9714740242751585	0.144	0.002	0	MCE	AT2G02210	NA	3 DAP	NA	NA	NA	NA	NA
0	6.955283541433508	0.133	0.001	0	MCE	AT5G58850	ATMYB119,MYB119	3 DAP	AT5G58850.1	0	1	1	1
0	6.943952460183515	0.175	0.001	0	MCE	AT1G06907	NA	3 DAP	NA	NA	NA	NA	NA
0	6.8994791258847314	0.407	0.004	0	MCE	AT2G29330	TRI	3 DAP	AT2G29330.1	0	1	1	1
0	6.894639902561685	0.154	0.002	0	MCE	AT4G07520	NA	3 DAP	NA	NA	NA	NA	NA
0	6.793444519517731	0.136	0.001	0	MCE	AT5G50115	NA	3 DAP	AT5G50115.1	1.327	0.515108	1	1
0	6.706917565914808	0.235	0.003	0	MCE	AT3G54550	NA	3 DAP	NA	NA	NA	NA	NA
0	6.681358147903288	0.545	0.018	0	MCE	AT2G38255	NA	3 DAP	NA	NA	NA	NA	NA
0	6.679926943470685	0.213	0.002	0	MCE	AT1G74990	NA	3 DAP	AT1G74990.1	0	1	1	1
0	6.670867418951361	0.513	0.012	0	MCE	AT3G11920	NA	3 DAP	AT3G11920.1	8.873	0.011835	0.148249	1
0	6.669375668007152	0.13	0.001	0	MCE	AT1G06747	NA	3 DAP	NA	NA	NA	NA	NA
0	6.662383511047064	0.095	0.001	0	MCE	AT3G04100	AGL57	3 DAP	AT3G04100.1	13.077	0.001446	0.030696	1
0	6.598054382822868	0.361	0.007	0	MCE	AT1G09880	NA	3 DAP	AT1G09880.1	0	1	1	1
0	6.508339902088867	0.402	0.008	0	MCE	AT5G07260	NA	3 DAP	NA	NA	NA	NA	NA
0	6.45608	0.225	0.003	0	MCE	AT3G28250	NA	3 DAP	NA	NA	NA	NA	NA
0	6.4440784696859605	0.111	0.001	0	MCE	AT3G59340	NA	3 DAP	AT3G59340.1	4.748	0.093128	0.617549	1
0	6.421057095423911	0.129	0.002	0	MCE	AT3G23950	NA	3 DAP	AT3G23950.1	3.486	0.175024	0.928895	1
0	6.414163024196499	0.115	0.002	0	MCE	AT2G27320	NA	3 DAP	AT2G27320.1	4.248	0.119529	0.731839	1
0	6.32486	0.236	0.003	0	MCE	AT2G26050	NA	3 DAP	NA	NA	NA	NA	NA
0	6.306880089587067	0.142	0.001	0	MCE	AT1G28323	NA	3 DAP	NA	NA	NA	NA	NA
0	6.302454790108481	0.183	0.003	0	MCE	AT4G23080	NA	3 DAP	AT4G23080.1	1.311	0.519278	1	1
0	6.279022547993335	0.191	0.003	0	MCE	AT5G64890	PEP2,PROPEP2	3 DAP	AT5G64890.1	0.104	0.94917	1	1
0	6.271477982688809	0.236	0.003	0	MCE	AT5G56200	NA	3 DAP	AT5G56200.1	24.024	6e-6	3.54e-4	1
0	6.265543124858828	0.254	0.004	0	MCE	AT3G21690	NA	3 DAP	AT3G21690.1	0	1	1	1
0	6.260877019411705	0.278	0.005	0	MCE	AT3G46840	NA	3 DAP	AT3G46840.1	0	1	1	1
0	6.25416	0.252	0.004	0	MCE	AT5G40680	NA	3 DAP	AT5G40680.1	0	1	1	1
0	6.204693645631506	0.474	0.013	0	MCE	AT1G55600	ATWRKY10,MINI3,WRKY10	3 DAP	AT1G55600.1	1.68	0.431687	1	1
0	6.190322799081166	0.458	0.01	0	MCE	AT4G15053	NA	3 DAP	AT4G15053.1	6.93	0.031276	0.29836	1
0	6.154887663994346	0.368	0.007	0	MCE	AT2G35250	NA	3 DAP	AT2G35250.1	0	1	1	1
0	6.15343	0.125	0.002	0	MCE	AT5G59190	NA	3 DAP	AT5G59190.1	1.681	0.431451	1	1
0	6.1037593735264855	0.534	0.016	0	MCE	AT1G10190	NA	3 DAP	AT1G10190.1	7.579	0.022606	0.235829	1
0	6.076043687928492	0.209	0.004	0	MCE	AT2G41451	NA	3 DAP	AT2G41451.1	0.394	0.821228	1	1
0	6.063129029006527	0.31	0.004	0	MCE	AT5G14860	NA	3 DAP	AT5G14860.1	0.282	0.868374	1	1
0	6.057799704656825	0.497	0.016	0	MCE	AT4G32380	NA	3 DAP	AT4G32380.1	6.95	0.030966	0.296698	1
0	6.013452571701747	0.099	0.001	0	MCE	AT2G32360	NA	3 DAP	AT2G32360.1	20.592	3.4e-5	0.001499	1
0	6.004377031767886	0.112	0.001	0	MCE	AT4G28703	NA	3 DAP	AT4G28703.1	0	1	1	1
0	5.9862818102374655	0.183	0.003	0	MCE	AT3G55860	NA	3 DAP	AT3G55860.1	18.227	1.1e-4	0.003803	1
0	5.965222981264834	0.245	0.005	0	MCE	AT5G15050	GlcAT14B	3 DAP	AT5G15050.1	0	1	1	1
0	5.962992003971808	0.569	0.021	0	MCE	AT4G33840	NA	3 DAP	AT4G33840.1	5.734	0.056863	0.444559	1
0	5.8996811504636675	0.144	0.002	0	MCE	AT1G43000	NA	3 DAP	AT1G43000.1	3.927	0.14039	0.80838	1
0	5.89159	0.148	0.002	0	MCE	AT3G55672	NA	3 DAP	AT3G55672.1	3.361	0.186253	0.96328	1
0	5.861194121861082	0.427	0.009	0	MCE	AT4G13955	NA	3 DAP	NA	NA	NA	NA	NA
0	5.854249307295124	0.377	0.013	0	MCE	AT1G32540	LOL1	3 DAP	NA	NA	NA	NA	NA
0	5.816348948138064	0.142	0.003	0	MCE	AT2G46430	ATCNGC3,CNGC3,CNGC3.C	3 DAP	AT2G46430.1	10.158	0.006226	0.09173	1
0	5.774915282501182	0.414	0.017	0	MCE	AT5G63800	BGAL6,MUM2	3 DAP	AT5G63800.1	0	1	1	1
0	5.751394959950774	0.192	0.003	0	MCE	AT2G27936	NA	3 DAP	NA	NA	NA	NA	NA
0	5.7387844727492885	0.677	0.044	0	MCE	AT4G39650	GGT2	3 DAP	AT4G39650.1	0	1	1	1
0	5.717327241642695	0.159	0.003	0	MCE	AT5G19270	NA	3 DAP	AT5G19270.1	6.064	0.048228	0.39809	1
0	5.70423	0.13	0.002	0	MCE	AT5G45980	STPL,WOX8,WOX9B	3 DAP	AT5G45980.1	0	1	1	1
0	5.696088951883317	0.137	0.002	0	MCE	AT2G17750	NIP1	3 DAP	AT2G17750.1	0	1	1	1
0	5.674106581059325	0.469	0.032	0	MCE	AT1G34790	TT1,WIP1	3 DAP	AT1G34790.1	10.244	0.005964	0.088643	1
0	5.66807	0.213	0.004	0	MCE	AT1G11530	ATCXXS1,CXXS1	3 DAP	AT1G11530.1	0.163	0.921622	1	1
0	5.63761	0.315	0.008	0	MCE	AT3G50020	NA	3 DAP	AT3G50020.1	6.162	0.04591	0.385731	1
0	5.627551453747852	0.13	0.002	0	MCE	AT3G10600	CAT7	3 DAP	AT3G10600.1	0.067	0.967184	1	1
0	5.6018763885287175	0.358	0.016	0	MCE	AT1G33110	NA	3 DAP	AT1G33110.1	0	1	1	1
0	5.600826198378986	0.262	0.008	0	MCE	AT2G24740	SDG21,SUVH8	3 DAP	NA	NA	NA	NA	NA
0	5.579110890973225	0.353	0.013	0	MCE	AT5G39440	SnRK1.3	3 DAP	AT5G39440.1	0.825	0.662063	1	1
0	5.560455514846507	0.223	0.006	0	MCE	AT2G22040	LST8-2	3 DAP	NA	NA	NA	NA	NA
0	5.544218845359024	0.399	0.013	0	MCE	AT1G22210	TPPC	3 DAP	NA	NA	NA	NA	NA
0	5.542691590977259	0.287	0.008	0	MCE	AT3G10290	NA	3 DAP	NA	NA	NA	NA	NA
0	5.540097841703699	0.161	0.004	0	MCE	AT3G03760	LBD20	3 DAP	AT3G03760.1	0.013	0.993496	1	1
0	5.5134706283160755	0.262	0.008	0	MCE	AT2G35890	CPK25	3 DAP	AT2G35890.1	0	1	1	1
0	5.506160409340547	0.514	0.02	0	MCE	AT3G57270	BG1,GNS1	3 DAP	NA	NA	NA	NA	NA
0	5.386963777362138	0.304	0.008	0	MCE	AT4G02300	PME39	3 DAP	AT4G02300.1	0.111	0.945813	1	1
0	5.383716897975041	0.354	0.012	0	MCE	AT1G56400	NA	3 DAP	AT1G56400.1	2.083	0.35293	1	1
0	5.380470795108076	0.507	0.02	0	MCE	AT2G04425	LCR82	3 DAP	NA	NA	NA	NA	NA
0	5.366705628345308	0.15	0.003	0	MCE	AT3G01870	NA	3 DAP	AT3G01870.1	0	1	1	1
0	5.362032010022239	0.13	0.003	0	MCE	AT4G35733	AtFDA18	3 DAP	AT4G35733.1	2.052	0.358404	1	1
0	5.34121	0.653	0.045	0	MCE	AT4G15050	NA	3 DAP	AT4G15050.1	9.709	0.007792	0.108515	1
0	5.326877576260979	0.708	0.064	0	MCE	AT1G54445	NA	3 DAP	AT1G54445.1	1.367	0.504887	1	1
0	5.325077219127802	0.199	0.005	0	MCE	AT3G55665	NA	3 DAP	AT3G55665.1	5.93	0.051564	0.415827	1
0	5.316656774484933	0.24	0.006	0	MCE	AT1G01570	NA	3 DAP	AT1G01570.1	0	1	1	1
0	5.280409718633933	0.245	0.008	0	MCE	AT1G51270	NA	3 DAP	NA	NA	NA	NA	NA
0	5.226859827095069	0.302	0.011	0	MCE	AT5G48905	LCR12	3 DAP	AT5G48905.1	0.336	0.845195	1	1
0	5.210378503366099	0.144	0.004	0	MCE	AT5G54215	NA	3 DAP	AT5G54215.1	2.272	0.321042	1	1
0	5.199323200592437	0.136	0.003	0	MCE	AT3G55940	PLC7	3 DAP	AT3G55940.1	0	1	1	1
0	5.195170312819054	0.141	0.003	0	MCE	AT1G28327	NA	3 DAP	NA	NA	NA	NA	NA
0	5.165996935573915	0.256	0.009	0	MCE	AT4G23350	NA	3 DAP	NA	NA	NA	NA	NA
0	5.16131	0.233	0.011	0	MCE	AT5G57150	NA	3 DAP	AT5G57150.1	3.977	0.13691	0.79624	1
0	5.1410384948378844	0.154	0.004	0	MCE	AT4G08550	NA	3 DAP	AT4G08550.1	35.697	0	0	1
0	5.128742623606425	0.267	0.007	0	MCE	AT2G05117	SCRL9	3 DAP	NA	NA	NA	NA	NA
0	5.066606980194138	0.382	0.012	0	MCE	AT5G55131	NA	3 DAP	AT5G55131.1	18.613	9.1e-5	0.003277	1
0	5.037153082719517	0.493	0.02	0	MCE	AT2G45110	ATEXPB4,ATHEXP,EXPB4	3 DAP	NA	NA	NA	NA	NA
0	5.028134592510176	0.451	0.017	0	MCE	AT4G33830	NA	3 DAP	AT4G33830.1	0.504	0.777153	1	1
0	5.023522836666382	0.252	0.01	0	MCE	AT5G08730	ARI16,ATARI16	3 DAP	AT5G08730.1	5.865	0.053258	0.425422	1
0	5.016076805873997	0.254	0.005	0	MCE	AT3G29570	NA	3 DAP	NA	NA	NA	NA	NA
0	5.001453612200737	0.416	0.018	0	MCE	AT3G10595	NA	3 DAP	AT3G10595.1	2.291	0.318006	1	1
0	4.996270735671456	0.399	0.02	0	MCE	AT5G35630	ATGSL1,GLN2,GS2	3 DAP	AT5G35630.1	0	1	1	1
0	4.991692413578448	0.217	0.006	0	MCE	AT5G06500	AGL96	3 DAP	NA	NA	NA	NA	NA
0	4.94724	0.513	0.033	0	MCE	AT1G24062	NA	3 DAP	AT1G24062.1	0	1	1	1
0	4.94614	0.335	0.015	0	MCE	AT1G49770	RGE1,ZOU	3 DAP	AT1G49770.1	5.256	0.072232	0.523722	1
0	4.942770778791319	0.252	0.011	0	MCE	AT5G50070	NA	3 DAP	NA	NA	NA	NA	NA
0	4.933430224892726	0.229	0.009	0	MCE	AT3G42473	LCR47	3 DAP	NA	NA	NA	NA	NA
0	4.927546824405946	0.236	0.009	0	MCE	AT2G44550	AtGH9B10,GH9B10	3 DAP	AT2G44550.1	6.004	0.049681	0.405689	1
0	4.909683038224468	0.497	0.03	0	MCE	AT3G03828	NA	3 DAP	NA	NA	NA	NA	NA
0	4.898692167810362	0.329	0.012	0	MCE	AT4G29033	NA	3 DAP	AT4G29033.1	0	1	1	1
0	4.872906918102441	0.2	0.006	0	MCE	AT5G27238	NA	3 DAP	AT5G27238.1	4.473	0.106812	0.678879	1
0	4.865114224406032	0.37	0.021	0	MCE	AT1G24764	ATMAP70-2,MAP70-2	3 DAP	AT1G24764.1	0	1	1	1
0	4.864828215540646	0.614	0.043	0	MCE	AT3G17150	NA	3 DAP	NA	NA	NA	NA	NA
0	4.842337436708858	0.316	0.011	0	MCE	AT3G24065	NA	3 DAP	NA	NA	NA	NA	NA
0	4.7576623984626725	0.41	0.021	0	MCE	AT3G17152	NA	3 DAP	AT3G17152.1	2.045	0.359659	1	1
0	4.7438352959962025	0.35	0.02	0	MCE	AT1G67270	NA	3 DAP	AT1G67270.1	5.503	0.063836	0.479487	1
0	4.70655	0.44	0.026	0	MCE	AT1G44130	NA	3 DAP	AT1G44130.1	0.181	0.913442	1	1
0	4.687117724855297	0.267	0.01	0	MCE	AT4G29273	LCR23	3 DAP	AT4G29273.1	5.984	0.050192	0.408856	1
0	4.6774152029391844	0.635	0.046	0	MCE	AT4G22115	SCRL14	3 DAP	AT4G22115.1	8.998	0.011122	0.141611	1
0	4.639005755973265	0.535	0.038	0	MCE	AT2G19500	ATCKX2,CKX2	3 DAP	AT2G19500.1	1.228	0.541241	1	1
0	4.636484375701544	0.294	0.016	0	MCE	AT5G23700	NA	3 DAP	AT5G23700.1	0.229	0.891741	1	1
0	4.636310218091217	0.321	0.019	0	MCE	AT2G24030	NA	3 DAP	AT2G24030.1	23.293	9e-6	4.96e-4	1
0	4.616925827164302	0.477	0.025	0	MCE	AT3G10195	NA	3 DAP	NA	NA	NA	NA	NA
0	4.6116485578951245	0.296	0.011	0	MCE	AT3G55677	NA	3 DAP	AT3G55677.1	20.484	3.6e-5	0.001554	1
0	4.600967891678185	0.466	0.024	0	MCE	AT5G15000	NA	3 DAP	AT5G15000.1	0.681	0.711454	1	1
0	4.5710433180094086	0.655	0.054	0	MCE	AT2G22121	LCR35	3 DAP	AT2G22121.1	0.793	0.672785	1	1
0	4.554960509174876	0.727	0.088	0	MCE	AT2G02498	NA	3 DAP	NA	NA	NA	NA	NA
0	4.547469796678718	0.514	0.043	0	MCE	AT1G03445	BSU1	3 DAP	AT1G03445.1	11.842	0.002682	0.049492	1
0	4.535124093516178	0.593	0.055	0	MCE	AT2G02490	NA	3 DAP	NA	NA	NA	NA	NA
0	4.524992534712208	0.462	0.027	0	MCE	AT4G09153	LCR36	3 DAP	AT4G09153.1	7.342	0.025445	0.257067	1
0	4.52075	0.506	0.036	0	MCE	AT5G40260	AtSWEET8,RPG1,SWEET8	3 DAP	AT5G40260.1	0	1	1	1
0	4.518063743695845	0.801	0.173	0	MCE	AT5G39280	ATEXP23,ATEXPA23,ATHEXP,EXPA23	3 DAP	AT5G39280.1	2.01	0.366046	1	1
0	4.517278206577172	0.402	0.028	0	MCE	AT1G54280	ALA6	3 DAP	AT1G54280.1	0	1	1	1
0	4.51033	0.722	0.079	0	MCE	AT1G56233	NA	3 DAP	NA	NA	NA	NA	NA
0	4.508503463348431	0.245	0.01	0	MCE	AT2G33780	MVQ2	3 DAP	AT2G33780.1	7.255	0.026582	0.26552	1
0	4.483519226958735	0.478	0.034	0	MCE	AT5G32619	NA	3 DAP	NA	NA	NA	NA	NA
0	4.432998502498082	0.469	0.034	0	MCE	AT3G26910	NA	3 DAP	AT3G26910.1	0.389	0.823127	1	1
0	4.418382795667181	0.245	0.011	0	MCE	AT5G06380	NA	3 DAP	AT5G06380.1	6.051	0.048532	0.399381	1
0	4.4178376347806445	0.27	0.013	0	MCE	AT5G25410	NA	3 DAP	AT5G25410.1	3.296	0.192387	0.986595	1
0	4.416027304477865	0.382	0.021	0	MCE	AT4G29280	LCR22	3 DAP	AT4G29280.1	0	1	1	1
0	4.408605491846484	0.758	0.117	0	MCE	AT2G21465	NA	3 DAP	NA	NA	NA	NA	NA
0	4.402362887884222	0.464	0.03	0	MCE	AT5G19175	NA	3 DAP	AT5G19175.1	1.853	0.395947	1	1
0	4.390356707933547	0.345	0.018	0	MCE	AT3G28490	NA	3 DAP	AT3G28490.1	0	1	1	1
0	4.37671	0.357	0.024	0	MCE	AT4G29810	ATMKK2,MK1,MKK2	3 DAP	AT4G29810.1	0	1	1	1
0	4.365427916227932	0.196	0.007	0	MCE	AT1G64830	NA	3 DAP	NA	NA	NA	NA	NA
0	4.36492	0.661	0.084	0	MCE	AT2G44540	AtGH9B9,GH9B9	3 DAP	AT2G44540.1	2.207	0.331715	1	1
0	4.354549119707999	0.466	0.036	0	MCE	AT3G14850	TBL41	3 DAP	NA	NA	NA	NA	NA
0	4.352079224039263	0.648	0.06	0	MCE	AT2G20465	NA	3 DAP	AT2G20465.1	0	1	1	1
0	4.312934121903387	0.283	0.019	0	MCE	AT1G30400	ABCC1,ATABCC1,ATMRP1,EST1,MRP1	3 DAP	AT1G30400.1	0	1	1	1
0	4.3056921248410065	0.352	0.022	0	MCE	AT3G57160	NA	3 DAP	NA	NA	NA	NA	NA
0	4.279746665734856	0.461	0.031	0	MCE	AT2G20463	NA	3 DAP	NA	NA	NA	NA	NA
0	4.267181363914459	0.283	0.016	0	MCE	AT4G13095	LCR37	3 DAP	AT4G13095.1	2.951	0.228629	1	1
0	4.26116	0.487	0.033	0	MCE	AT3G27425	NA	3 DAP	AT3G27425.1	6.726	0.034629	0.318743	1
0	4.254721830617224	0.306	0.017	0	MCE	AT1G09380	UMAMIT25	3 DAP	AT1G09380.1	3.085	0.213824	1	1
0	4.250962958562328	0.556	0.053	0	MCE	AT2G32550	NOT9c	3 DAP	AT2G32550.1	8.445	0.014665	0.172961	1
0	4.243733261111685	0.742	0.128	0	MCE	AT5G39260	ATEXP21,ATEXPA21,ATHEXP,EXP21,EXPA21	3 DAP	NA	NA	NA	NA	NA
0	4.240097517175553	0.382	0.03	0	MCE	AT1G61688	NA	3 DAP	AT1G61688.1	8.206	0.016523	0.189108	1
0	4.2271761961786245	0.838	0.163	0	MCE	AT4G15735	SCRL10	3 DAP	NA	NA	NA	NA	NA
0	4.226118159330199	0.679	0.069	0	MCE	AT4G19905	LCR38	3 DAP	NA	NA	NA	NA	NA
0	4.200481160487345	0.275	0.014	0	MCE	AT2G04046	NA	3 DAP	AT2G04046.1	0	1	1	1
0	4.196229160070633	0.509	0.044	0	MCE	AT4G31900	CHR7,PKR2	3 DAP	NA	NA	NA	NA	NA
0	4.185366893403175	0.581	0.051	0	MCE	AT4G29283	LCR21	3 DAP	AT4G29283.1	0.276	0.871097	1	1
0	4.177939039589551	0.373	0.018	0	MCE	AT4G20800	AtBBE17	3 DAP	AT4G20800.1	0	1	1	1
0	4.171249810175359	0.398	0.031	0	MCE	AT2G03955	NA	3 DAP	AT2G03955.1	5.923	0.051728	0.416516	1
0	4.170281254565043	0.373	0.031	0	MCE	AT2G44590	ADL1D,DL1D	3 DAP	AT2G44590.1	0	1	1	1
0	4.1657453158833055	0.561	0.054	0	MCE	AT1G66870	NA	3 DAP	AT1G66870.1	2.462	0.292062	1	1
0	4.153138948307404	0.499	0.041	0	MCE	AT2G17690	AtFDA13,SDC	3 DAP	NA	NA	NA	NA	NA
0	4.081911974291504	0.274	0.013	0	MCE	AT2G37720	TBL15	3 DAP	AT2G37720.1	0	1	1	1
0	4.080288749956765	0.456	0.037	0	MCE	AT1G13609	NA	3 DAP	AT1G13609.1	0.263	0.876903	1	1
0	4.072629384476905	0.701	0.093	0	MCE	AT1G56415	NA	3 DAP	NA	NA	NA	NA	NA
0	4.063628181265498	0.777	0.141	0	MCE	AT5G46960	AtPMEI12,InvINH1	3 DAP	AT5G46960.1	10.49	0.005275	0.081198	1
0	4.0493466190017635	0.298	0.019	0	MCE	AT3G24068	NA	3 DAP	NA	NA	NA	NA	NA
0	4.025814430613902	0.578	0.056	0	MCE	AT4G29285	LCR24	3 DAP	AT4G29285.1	0.444	0.800867	1	1
0	4.017286624450926	0.395	0.03	0	MCE	AT5G58830	NA	3 DAP	AT5G58830.1	3.223	0.199572	1	1
0	3.999823885841983	0.585	0.061	0	MCE	AT3G01325	NA	3 DAP	AT3G01325.1	17.971	1.25e-4	0.004174	1
0	3.97982	0.717	0.109	0	MCE	AT5G54220	NA	3 DAP	AT5G54220.1	5.13	0.076912	0.54533	1
0	3.9652796089033844	0.356	0.022	0	MCE	AT3G29152	NA	3 DAP	NA	NA	NA	NA	NA
0	3.958001143158879	0.563	0.056	0	MCE	AT1G10745	ESF1.2	3 DAP	NA	NA	NA	NA	NA
0	3.954053873064796	0.391	0.035	0	MCE	AT1G54450	NA	3 DAP	AT1G54450.1	0	1	1	1
0	3.936629243432843	0.763	0.131	0	MCE	AT5G39300	ATEXP25,ATEXPA25,ATHEXP,EXP25,EXPA25	3 DAP	AT5G39300.1	1.218	0.54381	1	1
0	3.9363284924445154	0.88	0.198	0	MCE	AT5G55132	NA	3 DAP	AT5G55132.1	24.205	6e-6	3.54e-4	1
0	3.895801363344622	0.507	0.073	0	MCE	AT1G65840	ATPAO4,PAO4	3 DAP	AT1G65840.1	0	1	1	1
0	3.8722864442009683	0.528	0.045	0	MCE	AT4G16165	NA	3 DAP	AT4G16165.1	8.883	0.011777	0.147722	1
0	3.8235113508772263	0.328	0.025	0	MCE	AT4G25900	NA	3 DAP	AT4G25900.1	0	1	1	1
0	3.819468412806268	0.748	0.095	0	MCE	AT2G24693	NA	3 DAP	NA	NA	NA	NA	NA
0	3.805785482019836	0.292	0.017	0	MCE	AT3G27999	NA	3 DAP	AT3G27999.1	6.487	0.039021	0.344761	1
0	3.7286708834822617	0.559	0.069	0	MCE	AT2G20208	LCR60	3 DAP	AT2G20208.1	5.052	0.079981	0.559234	1
0	3.676702016180793	0.36	0.03	0	MCE	AT5G19172	NA	3 DAP	AT5G19172.1	1.252	0.534692	1	1
0	3.658489389385643	0.777	0.154	0	MCE	AT5G09730	ATBX3,ATBXL3,BX3,BXL3,XYL3	3 DAP	NA	NA	NA	NA	NA
0	3.631981243154979	0.689	0.107	0	MCE	AT2G02515	NA	3 DAP	NA	NA	NA	NA	NA
0	3.6237852873037797	0.76	0.129	0	MCE	AT3G24510	NA	3 DAP	NA	NA	NA	NA	NA
0	3.485933206585921	0.943	0.384	0	MCE	AT2G30810	NA	3 DAP	AT2G30810.1	0	1	1	1
0	3.4791268536587454	0.614	0.091	0	MCE	AT5G46950	InvINH2	3 DAP	AT5G46950.1	9.026	0.010968	0.140083	1
0	3.1472320063576618	0.831	0.189	0	MCE	AT5G63087	NA	3 DAP	AT5G63087.1	20.892	2.9e-5	0.001305	1
0	3.1280623128976925	0.511	0.058	0	MCE	AT1G11070	NA	3 DAP	AT1G11070.1	7.186	0.027512000000000002	0.272318	1
0	3.118745555586673	0.78	0.178	0	MCE	AT1G77525	NA	3 DAP	AT1G77525.1	6.821	0.033033	0.309113	1
8.125540169588668e-308	3.721989821108221	0.465	0.056	1.7677112638940145e-303	MCE	AT4G32105	NA	3 DAP	AT4G32105.1	0.003	0.998342	1	1
3.4307001637802094e-304	5.3309	0.144	0.004	7.463488206303845e-300	MCE	AT1G65970	PRXIIC,TPX2	3 DAP	AT1G65970.1	0	1	1	1
1.0502226866968344e-301	3.815211484633977	0.424	0.041	2.2847594549089632e-297	MCE	AT3G48300	CYP71A23	3 DAP	AT3G48300.1	0	1	1	1
1.243666240644103e-299	5.5413339011699785	0.092	0.001	2.705595906521246e-295	MCE	AT2G40210	AGL48	3 DAP	AT2G40210.1	4.141	0.126131	0.758748	1
1.4014447584159656e-299	4.411289022400087	0.271	0.013	3.048843071933933e-295	MCE	AT1G15960	ATNRAMP6,NRAMP6	3 DAP	AT1G15960.1	0.591	0.744106	1	1
1.4485210886752684e-299	4.8666456504520355	0.22	0.012	3.1512576284130466e-295	MCE	AT1G70300	KUP6	3 DAP	AT1G70300.1	0	1	1	1
1.922416466383669e-299	4.1870476659378415	0.224	0.013	4.1822170226176716e-295	MCE	AT3G25160	NA	3 DAP	AT3G25160.1	0	1	1	1
1.0229477693047897e-297	7.300893527035714	0.063	0	2.2254228721225702e-293	MCE	AT1G35242	NA	3 DAP	NA	NA	NA	NA	NA
3.7171276058449995e-297	3.3714603117539976	0.353	0.039	8.086611106515797e-293	MCE	AT4G13495	NA	3 DAP	NA	NA	NA	NA	NA
6.581162074282078e-297	4.882769652030221	0.13	0.003	1.4317318092600661e-292	MCE	AT5G59110	NA	3 DAP	NA	NA	NA	NA	NA
2.563789424416432e-294	4.874702750056139	0.161	0.006	5.577523892817948e-290	MCE	AT5G14470	AtGALK2,GALK2	3 DAP	NA	NA	NA	NA	NA
7.949469067256293e-293	2.8246214584905043	0.684	0.121	1.7294069955816065e-288	MCE	AT1G13605	NA	3 DAP	AT1G13605.1	5.305	0.070469	0.514224	1
1.8477976721996714e-292	2.966584295667084	0.457	0.033	4.019883835870385e-288	MCE	AT4G33270	AtCDC20.1,CDC20.1	3 DAP	AT4G33270.1	0	1	1	1
1.8192595032540332e-291	4.8571515472629425	0.208	0.009	3.957799049329149e-287	MCE	AT1G35537	AtPDFL2.1	3 DAP	NA	NA	NA	NA	NA
2.6138567677243484e-290	8.01204	0.096	0	5.68644539818432e-286	MCE	AT2G12940	UNE4	3 DAP	AT2G12940.1	5.966	0.050633	0.410997	1
6.554573471902366e-290	3.06693	0.551	0.076	1.4259474588123597e-285	MCE	AT5G42223	NA	3 DAP	NA	NA	NA	NA	NA
1.503646803023798e-289	4.130163223432048	0.238	0.015	3.2711836199782726e-285	MCE	AT2G03290	NA	3 DAP	AT2G03290.1	1.379	0.501704	1	1
5.270496111341451e-289	6.781020277351789	0.125	0.001	1.1465964290223327e-284	MCE	AT3G54925	NA	3 DAP	AT3G54925.1	1.834	0.399763	1	1
2.661619243967361e-286	6.008211802937357	0.103	0.001	5.7903526652509945e-282	MCE	AT3G46680	NA	3 DAP	NA	NA	NA	NA	NA
9.805881119957054e-286	5.121986428008115	0.111	0.002	2.133269437646657e-281	MCE	AT5G61470	NA	3 DAP	AT5G61470.1	13.132	0.001407	0.030057	1
9.256325882294654e-277	3.384839362378125	0.44	0.06	2.0137136956932018e-272	MCE	AT4G02260	AT-RSH1,ATRSH1,RSH1	3 DAP	AT4G02260.1	0	1	1	1
1.2898726804042683e-276	4.519409275975536	0.192	0.008	2.8061180162194858e-272	MCE	AT5G04047	NA	3 DAP	AT5G04047.1	3.987	0.13623	0.793902	1
1.8710640833754634e-276	4.251567296038365	0.248	0.015	4.07049991338332e-272	MCE	AT4G14276	NA	3 DAP	NA	NA	NA	NA	NA
3.509275482056451e-276	3.768585178489629	0.291	0.026	7.634428811213809e-272	MCE	AT1G78710	TBL42	3 DAP	AT1G78710.1	0	1	1	1
3.621074370504934e-274	4.141891390595488	0.264	0.022	7.877647293033484e-270	MCE	AT2G35670	FIE2,FIS2	3 DAP	NA	NA	NA	NA	NA
3.910149899090211e-273	4.461946492116224	0.253	0.018	8.506531105470755e-269	MCE	AT4G33110	NA	3 DAP	AT4G33110.1	0	1	1	1
1.424441050044668e-270	3.3748203502366128	0.357	0.035	3.0988715043721754e-266	MCE	AT4G03945	NA	3 DAP	AT4G03945.1	9.779	0.007525	0.105829	1
1.3432383633767557e-269	3.28534	0.422	0.059	2.922215059526132e-265	MCE	AT4G02660	BCHA2	3 DAP	NA	NA	NA	NA	NA
1.5839230107156301e-268	5.118793571822899	0.105	0.003	3.445824509811853e-264	MCE	AT5G13600	NA	3 DAP	AT5G13600.1	0	1	1	1
6.502795467110261e-268	2.9583385785039935	0.412	0.047	1.4146831538698374e-263	MCE	AT2G23970	NA	3 DAP	AT2G23970.1	0	1	1	1
3.691643425524719e-265	5.51891	0.092	0.001	8.031170272229027e-261	MCE	AT3G57210	NA	3 DAP	NA	NA	NA	NA	NA
1.7308148379351487e-261	6.08542	0.082	0.001	3.765387679927916e-257	MCE	AT5G24440	CID13	3 DAP	NA	NA	NA	NA	NA
1.7519053647994978e-258	3.914922048291703	0.264	0.024	3.8112701211213074e-254	MCE	AT1G50950	PDI13	3 DAP	AT1G50950.1	0	1	1	1
1.812556115500016e-258	3.1278959131826864	0.499	0.084	3.943215829270285e-254	MCE	AT5G39040	ABCB27,ALS1,AtALS1,ATTAP2,TAP2	3 DAP	AT5G39040.1	0	1	1	1
2.3981529718214643e-258	6.358816954808379	0.071	0.001	5.217181790197595e-254	MCE	AT5G27160	NA	3 DAP	NA	NA	NA	NA	NA
1.0496113576567234e-256	6.091514319915076	0.072	0.001	2.283429508582202e-252	MCE	AT3G17140	NA	3 DAP	AT3G17140.1	0	0.999826	1	1
2.6490707870568804e-256	3.3563770544706157	0.458	0.07	5.763053497242244e-252	MCE	AT2G41440	NA	3 DAP	AT2G41440.1	6.284	0.043186	0.368795	1
2.8906191762332596e-256	3.9924132718223078	0.182	0.008	6.288542017895456e-252	MCE	AT1G56620	NA	3 DAP	NA	NA	NA	NA	NA
1.6400321469598426e-251	3.03718	0.432	0.056	3.5678899357111376e-247	MCE	AT4G25530	FWA,HDG6	3 DAP	NA	NA	NA	NA	NA
3.261266478947706e-251	3.771898645230872	0.248	0.019	7.094885224950734e-247	MCE	AT1G78060	NA	3 DAP	NA	NA	NA	NA	NA
2.999175000173421e-250	-3.46293	0.088	0.797	6.524705212877278e-246	MCE	AT1G65370	NA	3 DAP	AT1G65370.1	1.903	0.386211	1	1
1.2322321965818914e-249	3.8586411517249184	0.187	0.01	2.6807211436639046e-245	MCE	AT5G63085	NA	3 DAP	AT5G63085.1	8.372	0.01521	0.177976	1
8.507079786282789e-249	6.10385	0.087	0.001	1.8507152075058207e-244	MCE	AT1G80740	CMT1,DMT4	3 DAP	AT1G80740.1	0	1	1	1
3.230384923680418e-248	3.2407680989604897	0.51	0.081	7.027702401466749e-244	MCE	AT3G54560	H2A.Z,HTA11	3 DAP	AT3G54560.1	0.001	0.999253	1	1
7.778859448066689e-248	6.469078083051052	0.061	0	1.6922908729269081e-243	MCE	AT2G33710	NA	3 DAP	AT2G33710.1	0	1	1	1
1.8614357517994763e-247	7.472763254537831	0.071	0	4.049553478039761e-243	MCE	AT3G09340	NA	3 DAP	AT3G09340.1	3.777	0.151331	0.848734	1
1.094528322138355e-246	3.11547	0.424	0.056	2.3811463648119915e-242	MCE	AT1G32280	AtEND1,END1	3 DAP	AT1G32280.1	0	1	1	1
4.616867940178188e-246	2.9030649187087008	0.375	0.043	1.0043996203857647e-241	MCE	AT5G02600	AtHMP42,NAKR1,NPCC6	3 DAP	AT5G02600.1	1.651	0.438052	1	1
3.0749744098659832e-245	4.069414622359809	0.159	0.007	6.689606828663447e-241	MCE	AT4G22105	SCRL26	3 DAP	AT4G22105.1	12.621	0.001818	0.036824	1
5.428472973638668e-244	3.8546897019727613	0.163	0.008	1.1809642954150921e-239	MCE	AT5G10890	NA	3 DAP	AT5G10890.1	0.5	0.778643	1	1
1.525009853802589e-243	4.2951130539730515	0.152	0.006	3.3176589369475323e-239	MCE	AT4G33820	NA	3 DAP	AT4G33820.1	11.363	0.003409	0.058869	1
6.194975545800786e-242	7.508835432045202	0.092	0.001	1.347716929988961e-237	MCE	AT1G35520	ARF15	3 DAP	NA	NA	NA	NA	NA
7.509666981853191e-239	5.313269575675617	0.12	0.004	1.6337280519021616e-234	MCE	AT5G52605	NA	3 DAP	NA	NA	NA	NA	NA
2.1969211076669378e-238	3.12074	0.437	0.066	4.779401869729423e-234	MCE	AT3G01323	NA	3 DAP	NA	NA	NA	NA	NA
6.757938019142216e-238	3.679898408432547	0.221	0.017	1.470189416064389e-233	MCE	AT3G13620	PUT4	3 DAP	AT3G13620.1	0	1	1	1
7.115975390628508e-235	4.233453623255755	0.191	0.012	1.548080446231232e-230	MCE	AT2G25305	NA	3 DAP	AT2G25305.1	2.628	0.26869	1	1
1.666672956112303e-234	6.942899705869509	0.065	0	3.6258470160223153e-230	MCE	AT4G23365	NA	3 DAP	NA	NA	NA	NA	NA
2.364888037390405e-234	2.621645497891663	0.705	0.201	5.1448139253428265e-230	MCE	AT1G77510	ATPDI6,ATPDIL1-2,PDI6,PDIL1-2	3 DAP	AT1G77510.1	8.258	0.016096	0.186056	1
9.430536935383547e-232	4.409536382025761	0.166	0.009	2.0516133102926905e-227	MCE	AT5G39640	NA	3 DAP	AT5G39640.1	7.222	0.02703	0.268508	1
6.0177643736702616e-229	2.6572206497529165	0.617	0.118	1.3091646394919653e-224	MCE	AT1G14455	NA	3 DAP	AT1G14455.1	5.279	0.071382	0.518405	1
4.3997654885236315e-228	3.784602971113153	0.451	0.08	9.57168982028316e-224	MCE	AT3G56320	NTP7	3 DAP	AT3G56320.1	0	1	1	1
4.4754001210564366e-228	3.0063940136900884	0.448	0.072	9.736232963358277e-224	MCE	AT5G52330	NA	3 DAP	AT5G52330.1	3.171	0.204852	1	1
1.699595854161518e-224	3.332729247204038	0.314	0.035	3.697470780728383e-220	MCE	AT2G46830	AtCCA1,CCA1	3 DAP	AT2G46830.1	0	1	1	1
8.497989036685225e-224	4.634625648955964	0.095	0.002	1.848737514930871e-219	MCE	AT5G35926	NA	3 DAP	NA	NA	NA	NA	NA
1.1251580102752597e-221	3.990399269737183	0.167	0.008	2.4477812513538274e-217	MCE	AT2G14846	NA	3 DAP	NA	NA	NA	NA	NA
1.6325896545832204e-221	2.924859758334904	0.358	0.05	3.551698793545796e-217	MCE	AT5G59810	ATSBT5.4,SBT5.4	3 DAP	AT5G59810.1	0	1	1	1
1.7880592530013093e-220	5.868561124588114	0.065	0.001	3.8899229049043484e-216	MCE	AT4G00610	NA	3 DAP	AT4G00610.1	10.837	0.004433	0.071281	1
7.600641788354261e-220	6.706220993865596	0.082	0.001	1.6535196210564695e-215	MCE	AT4G30380	NA	3 DAP	AT4G30380.1	7.207	0.02723	0.270031	1
5.04026143971254e-219	3.0755099180131085	0.318	0.04	1.096508876209463e-214	MCE	AT3G01330	DEL3,E2FF,E2L2	3 DAP	AT3G01330.1	0	1	1	1
7.551640972888201e-218	2.952041518324919	0.42	0.067	1.642859493651828e-213	MCE	AT2G29340	NA	3 DAP	AT2G29340.1	0	1	1	1
4.253352109512386e-217	4.811262498893703	0.115	0.004	9.253167514244195e-213	MCE	AT5G63070	NA	3 DAP	AT5G63070.1	0	1	1	1
6.303796888726178e-217	2.910849351219153	0.36	0.039	1.37139101314238e-212	MCE	AT1G02980	ATCUL2,CUL2	3 DAP	AT1G02980.1	11.786	0.002759	0.050604	1
1.5064464026586198e-215	5.580675346768062	0.071	0.001	3.2772741489838275e-211	MCE	AT1G05450	NA	3 DAP	NA	NA	NA	NA	NA
5.430418121261968e-215	3.1228889609537367	0.397	0.059	1.1813874622805412e-210	MCE	AT5G54225	LCR83	3 DAP	AT5G54225.1	0.81	0.666829	1	1
5.015242182049893e-214	3.270040251727734	0.572	0.137	1.0910659367049544e-209	MCE	AT5G04220	ATSYTC,NTMC2T1.3,NTMC2TYPE1.3,SYT3,SYTC	3 DAP	NA	NA	NA	NA	NA
5.8176139397772405e-214	4.622526108111559	0.108	0.003	1.2656219125985386e-209	MCE	AT1G28450	AGL58	3 DAP	AT1G28450.1	0	1	1	1
1.6088603130304246e-213	3.6518387141608257	0.195	0.015	3.5000756109976886e-209	MCE	AT2G03040	NA	3 DAP	AT2G03040.1	0.929	0.628367	1	1
4.7572602438315875e-213	4.6007179832463105	0.104	0.004	1.0349419660455618e-208	MCE	AT4G34580	AtSFH1,COW1,SRH1	3 DAP	AT4G34580.1	0.406	0.81637	1	1
4.631306880044028e-212	2.4890187115261075	0.543	0.111	1.0075408117535783e-207	MCE	AT1G79040	PSBR	3 DAP	AT1G79040.1	0	1	1	1
1.5114198219416385e-211	4.1559	0.203	0.015	3.2880938226340345e-207	MCE	AT1G78760	NA	3 DAP	NA	NA	NA	NA	NA
2.5329710867363315e-209	3.6664281843729993	0.285	0.03	5.510478599194889e-205	MCE	AT4G30064	LCR61	3 DAP	AT4G30064.1	7.554	0.022894	0.238164	1
5.507589004735052e-209	2.911938732820926	0.403	0.067	1.1981759879801105e-204	MCE	AT5G27600	ATLACS7,LACS7	3 DAP	AT5G27600.1	0	1	1	1
9.315266970207552e-209	5.19199	0.078	0.002	2.026536329368653e-204	MCE	AT5G39700	AtMYB89,MYB89	3 DAP	AT5G39700.1	6.48	0.039174	0.34564	1
1.3009653876061014e-207	2.0975530935195192	0.837	0.282	2.8302502007370736e-203	MCE	AT5G51105	NA	3 DAP	AT5G51105.1	0	1	1	1
5.063288791200725e-207	3.3599052614663343	0.206	0.018	1.1015184765257178e-202	MCE	AT2G28815	NA	3 DAP	AT2G28815.1	12.073	0.002389	0.045231	1
2.4655649044929847e-206	4.219146193020039	0.142	0.007	5.363836449724489e-202	MCE	AT3G17227	NA	3 DAP	AT3G17227.1	17.415	1.65e-4	0.005268	1
2.5208681763568153e-206	5.765887735291883	0.063	0.001	5.484148717664251e-202	MCE	AT3G16960	NA	3 DAP	NA	NA	NA	NA	NA
9.6857016545466e-206	3.4628557578446415	0.325	0.036	2.1071243949466127e-201	MCE	AT1G58235	NA	3 DAP	NA	NA	NA	NA	NA
1.1551310353407327e-205	3.774768575023707	0.169	0.01	2.512987567383764e-201	MCE	AT1G60970	NA	3 DAP	AT1G60970.1	0	1	1	1
1.3354484621930267e-205	2.8547124582269765	0.404	0.061	2.9052681295009296e-201	MCE	AT5G24316	NA	3 DAP	AT5G24316.1	1.928	0.381411	1	1
3.9597123184471274e-205	5.82043	0.069	0.001	8.614354148781726e-201	MCE	AT1G13608	NA	3 DAP	NA	NA	NA	NA	NA
2.015468217163067e-204	4.244248783472571	0.126	0.006	4.384651106438252e-200	MCE	AT3G55950	ATCRR3,CCR3	3 DAP	AT3G55950.1	0.561	0.755298	1	1
3.240173640642185e-204	-1.96705	0.481	0.929	7.048997755217073e-200	MCE	AT2G21660	ATGRP7,CCR2,GR-RBP7,GRP7,RBGA3,SRBP1	3 DAP	AT2G21660.1	26.489	2e-6	1.36e-4	1
2.4761318677361705e-203	5.151927774418133	0.082	0.001	5.386824878260039e-199	MCE	AT1G79330	AMC6,ATMC5,ATMCP2b,MC5,MCP2b	3 DAP	AT1G79330.1	0.304	0.85917	1	1
3.963423556428923e-202	4.8135552738205405	0.133	0.004	8.622427947011121e-198	MCE	AT1G17800	AtENODL22,ENODL22	3 DAP	AT1G17800.1	0	1	1	1
3.100492044868671e-200	3.401032271036706	0.253	0.025	6.745120443611794e-196	MCE	AT2G39675	NA	3 DAP	NA	NA	NA	NA	NA
5.517852676492802e-200	4.257765662531908	0.091	0.002	1.2004088497710091e-195	MCE	AT1G66852	NA	3 DAP	AT1G66852.1	5.915	0.051949	0.417571	1
6.494130000925734e-200	6.882556178986542	0.065	0.001	1.4127979817013935e-195	MCE	AT4G15056	NA	3 DAP	NA	NA	NA	NA	NA
6.623157269297315e-200	4.912972979549977	0.074	0.001	1.4408678639356309e-195	MCE	AT5G05120	NA	3 DAP	AT5G05120.1	2.098	0.3503	1	1
1.1236092431459372e-199	4.282633122321156	0.111	0.004	2.4444119084639865e-195	MCE	AT1G09500	NA	3 DAP	AT1G09500.1	1.713	0.42461	1	1
1.4454016677119877e-199	3.2966199102784306	0.245	0.027	3.1444713281074293e-195	MCE	AT3G21100	NA	3 DAP	AT3G21100.1	0.363	0.83399	1	1
3.288374331979278e-199	2.645953270526432	0.406	0.073	7.153858359220919e-195	MCE	AT3G51160	GMD2,MUR1,MUR_1,SFR8	3 DAP	AT3G51160.1	22.453	1.3e-5	6.79e-4	1
7.339799086769924e-199	5.898364363371767	0.08	0.001	1.596773291326797e-194	MCE	AT2G39410	MAGL7	3 DAP	NA	NA	NA	NA	NA
8.112321459084861e-199	3.362827901518416	0.25	0.026	1.7648355334239116e-194	MCE	AT1G66050	ORTH5,VIM2	3 DAP	AT1G66050.1	19.63	5.5e-5	0.002182	1
1.4511651507243353e-198	3.422530033762505	0.256	0.026	3.1570097854007917e-194	MCE	AT1G01060	LHY,LHY1	3 DAP	AT1G01060.1	0	1	1	1
3.128997966771868e-198	-3.45144	0.149	0.726	6.807135076712199e-194	MCE	AT2G46960	CYP709B1	3 DAP	NA	NA	NA	NA	NA
1.708587599199026e-195	2.8740641130200997	0.321	0.046	3.717032322057481e-191	MCE	AT1G62305	NA	3 DAP	AT1G62305.1	1.311	0.519105	1	1
9.858892615861805e-195	3.643190928678496	0.191	0.016	2.1448020885807359e-190	MCE	AT5G11110	ATSPS2F,KNS2,SPS1,SPS2F,SPSA2	3 DAP	AT5G11110.1	0	1	1	1
8.571574469825115e-193	2.945257223453109	0.34	0.05	1.8647460259104538e-188	MCE	AT2G15340	NA	3 DAP	NA	NA	NA	NA	NA
3.503991683301676e-192	2.861511727345148	0.47	0.104	7.622933907022796e-188	MCE	AT2G39770	CYT1,EMB101,GMP1,SOZ1,VTC1	3 DAP	AT2G39770.1	0	1	1	1
3.705163108005262e-191	3.4905372412249926	0.229	0.024	8.060582341465448e-187	MCE	AT3G23970	NA	3 DAP	AT3G23970.1	4.855	0.088242	0.596984	1
1.3649744700039996e-190	4.985393881751387	0.099	0.003	2.969501959493701e-186	MCE	AT2G23260	UGT84B1	3 DAP	AT2G23260.1	0	1	1	1
2.210983405820617e-190	4.580424448170519	0.125	0.006	4.8099943993627524e-186	MCE	AT1G11540	NA	3 DAP	NA	NA	NA	NA	NA
2.4734852759599116e-190	2.7766648434307175	0.398	0.072	5.381067217850787e-186	MCE	AT5G23580	ATCDPK9,ATCPK12,CDPK9,CPK12	3 DAP	AT5G23580.1	0	1	1	1
4.886210509340262e-190	2.591148383392174	0.372	0.06	1.062995096306974e-185	MCE	AT5G46110	APE2,TPT	3 DAP	AT5G46110.1	2.849	0.240629	1	1
3.656092438400658e-189	4.480642033758101	0.09	0.003	7.953829099740632e-185	MCE	AT1G19160	NA	3 DAP	AT1G19160.1	10.137	0.006292	0.092445	1
7.369106389939877e-189	3.1377593560037274	0.306	0.038	1.6031490951314204e-184	MCE	AT5G55700	BAM4,BMY6	3 DAP	AT5G55700.1	2.229	0.328161	1	1
8.098723528814699e-189	6.129562023895519	0.061	0.001	1.7618773036936377e-184	MCE	AT4G23360	NA	3 DAP	NA	NA	NA	NA	NA
4.1566709270876386e-188	3.3478005631522256	0.329	0.046	9.042837601879157e-184	MCE	AT3G14960	NA	3 DAP	AT3G14960.1	0	1	1	1
1.9250371975896054e-187	3.139369465717329	0.207	0.019	4.187918423356187e-183	MCE	AT3G48160	DEL1,E2FE,E2L3	3 DAP	AT3G48160.1	2.617	0.270222	1	1
6.5315304502639e-187	2.7701567398012923	0.408	0.072	1.4209344494549113e-182	MCE	AT4G32110	NA	3 DAP	AT4G32110.1	1.553	0.459985	1	1
1.307198437624544e-183	3.817882113011389	0.217	0.024	2.8438102010521952e-179	MCE	AT1G70060	SNL4	3 DAP	AT1G70060.1	0	1	1	1
3.7544469417757206e-183	2.0740621580040384	0.37	0.055	8.16779932183308e-179	MCE	AT4G14140	DMT02,DMT2,MET02,MET2	3 DAP	NA	NA	NA	NA	NA
2.3035500621439088e-182	5.092013982889299	0.07	0.001	5.011373160194073e-178	MCE	AT5G44480	DUR	3 DAP	NA	NA	NA	NA	NA
3.474784376624132e-182	4.124685570860941	0.182	0.015	7.559393411345799e-178	MCE	AT3G59960	ASHH4,SDG24	3 DAP	AT3G59960.1	0	1	1	1
1.8345856410842033e-180	3.2108306159986473	0.108	0.004	3.991141062178684e-176	MCE	AT4G02380	AtLEA5,LEA38,SAG21	3 DAP	AT4G02380.1	0	1	1	1
4.901469661922738e-180	2.2300262971392524	0.539	0.118	1.0663147249512918e-175	MCE	AT5G66570	MSP-1,OE33,OEE1,OEE33,PSBO-1,PSBO1	3 DAP	AT5G66570.1	0	1	1	1
6.737931287080636e-180	2.4042246564928504	0.469	0.085	1.4658369515043924e-175	MCE	AT5G54270	LHCB3,LHCB3*1	3 DAP	AT5G54270.1	0.001	0.99945	1	1
5.8765236330592385e-179	3.727056130068425	0.166	0.011	1.2784377163720373e-174	MCE	AT1G66855	NA	3 DAP	AT1G66855.1	3.992	0.13589	0.793075	1
4.984989990934299e-178	4.267811430577216	0.231	0.021	1.0844845725277568e-173	MCE	AT2G34130	NA	3 DAP	NA	NA	NA	NA	NA
7.999506975330626e-177	-3.16348	0.14	0.72	1.7402927424831778e-172	MCE	AT1G14520	MIOX1	3 DAP	AT1G14520.1	0	1	1	1
2.1193416329133896e-176	4.766614955944005	0.104	0.004	4.610627722403079e-172	MCE	AT3G09240	BSK9	3 DAP	AT3G09240.1	2.426	0.297352	1	1
1.5604217322229223e-175	4.810662027007204	0.053	0.001	3.3946974784509676e-171	MCE	AT1G43940	NA	3 DAP	NA	NA	NA	NA	NA
4.005561668348659e-175	4.3038161245742135	0.138	0.008	8.714099409492508e-171	MCE	AT5G11540	AtGulLO3,GulLO3	3 DAP	AT5G11540.1	3.448	0.178313	0.939177	1
5.56233569211052e-174	2.4126764571587946	0.439	0.099	1.2100861298186437e-169	MCE	AT3G08760	ATSIK	3 DAP	AT3G08760.1	0	1	1	1
2.3423651286400644e-173	2.6145046023183105	0.436	0.087	5.09581533735646e-169	MCE	AT1G05350	NA	3 DAP	AT1G05350.1	0	1	1	1
6.816837256629576e-173	2.3031418845614144	0.632	0.179	1.483002945179764e-168	MCE	AT1G58055	NA	3 DAP	NA	NA	NA	NA	NA
1.965178812503868e-172	2.3152003115073367	0.465	0.095	4.275246506602165e-168	MCE	AT1G06680	OE23,OEE2,PSBP-1,PSII-P	3 DAP	AT1G06680.1	5.395	0.06738	0.498046	1
3.402004622317946e-172	3.872285020735996	0.132	0.008	7.401061055852692e-168	MCE	AT4G03110	AtBRN1,AtRBP-DR1,BRN1,RBP-DR1	3 DAP	AT4G03110.1	13.321	0.00128	0.027939	1
4.210064399163295e-172	3.2030352021748563	0.203	0.024	9.158995100379749e-168	MCE	AT4G13575	NA	3 DAP	NA	NA	NA	NA	NA
1.3572132291959824e-171	3.6134179764684884	0.199	0.016	2.9526173801158597e-167	MCE	AT2G39435	TRM18	3 DAP	AT2G39435.1	2.43	0.296646	1	1
8.687572892090864e-171	4.319186241531874	0.137	0.009	1.8899814826743677e-166	MCE	AT5G20960	AAO1,AO1,AOalpha,AT-AO1,ATAO,AtAO1	3 DAP	AT5G20960.1	0.26	0.877894	1	1
1.2453024022828828e-170	2.822803141963349	0.302	0.044	2.7091553761664115e-166	MCE	AT3G12570	FYD	3 DAP	AT3G12570.1	0.049	0.975899	1	1
1.7783588041032427e-170	4.5260833548916235	0.146	0.01	3.868819578326604e-166	MCE	AT4G24860	NA	3 DAP	AT4G24860.1	37.816	0	0	1
7.549635739801265e-169	2.9163511182589246	0.287	0.043	1.6424232551937652e-164	MCE	AT4G32551	LUG,RON2	3 DAP	AT4G32551.1	0	1	1	1
8.45429951550816e-169	4.016602250975362	0.141	0.01	1.8392328595988003e-164	MCE	AT5G40430	AtMYB22,MYB22	3 DAP	AT5G40430.1	13.368	0.001251	0.027419	1
1.77072874262314e-168	3.392788958053974	0.194	0.018	3.852220379576641e-164	MCE	AT1G64200	VHA-E3	3 DAP	AT1G64200.1	0	1	1	1
5.256350832284214e-168	3.625514017577694	0.356	0.065	1.1435191235634308e-163	MCE	AT5G27610	ALY1,ATALY1	3 DAP	AT5G27610.1	12.252	0.002185	0.042274	1
7.083903771759541e-168	4.869648151755187	0.067	0.002	1.541103265546288e-163	MCE	AT1G01340	ACBK1,ATCNGC10,CNGC10	3 DAP	AT1G01340.1	0	1	1	1
1.1557817187027071e-167	1.9402621516729033	0.754	0.251	2.5144031290377394e-163	MCE	AT5G09370	LTPG29	3 DAP	AT5G09370.1	19.908	4.8e-5	0.001963	1
6.677876577936188e-167	2.047890382643876	0.594	0.136	1.4527720495300177e-162	MCE	AT3G05460	NA	3 DAP	NA	NA	NA	NA	NA
3.7550167380881825e-166	2.699990104366312	0.319	0.052	8.169038913710841e-162	MCE	AT2G05590	OXR2	3 DAP	AT2G05590.1	0.807	0.668124	1	1
2.636591287737951e-165	2.5869025010830313	0.381	0.073	5.735904346473913e-161	MCE	AT2G46930	PAE3	3 DAP	AT2G46930.1	9.481	0.008734	0.118263	1
1.9617658255071056e-164	2.3525330772576245	0.362	0.069	4.267821553390708e-160	MCE	AT3G16110	ATPDI4,ATPDIL1-6,PDI4,PDIL1-6	3 DAP	AT3G16110.1	1.637	0.441133	1	1
4.490987120250239e-163	4.442275732175589	0.109	0.006	9.770142480104396e-159	MCE	AT2G34990	ATL38	3 DAP	AT2G34990.1	10.015	0.006687	0.096718	1
6.328895296770656e-162	4.242362424796194	0.097	0.004	1.3768511718124561e-157	MCE	AT2G45135	NA	3 DAP	NA	NA	NA	NA	NA
7.189537890031716e-162	2.9048400169638002	0.339	0.057	1.5640839679764e-157	MCE	AT3G01324	NA	3 DAP	AT3G01324.1	2.702	0.258918	1	1
1.014781366204915e-161	2.613432585926911	0.341	0.059	2.207656862178793e-157	MCE	AT4G21280	PSBQ,PSBQ-1,PSBQA	3 DAP	AT4G21280.1	0	1	1	1
2.8506525286367964e-161	2.883340232366441	0.258	0.037	6.20159457604935e-157	MCE	AT2G40520	NTP2	3 DAP	AT2G40520.1	3.018	0.221077	1	1
2.0521317521166354e-159	2.6625843352194853	0.343	0.065	4.4644126267297405e-155	MCE	AT4G19020	CMT2	3 DAP	AT4G19020.1	0.539	0.76376	1	1
4.2549085491138515e-159	3.515231104195094	0.171	0.015	9.256553548597185e-155	MCE	AT5G56490	AtGulLO4,GulLO4	3 DAP	AT5G56490.1	0	1	1	1
4.383180069996347e-158	2.421375165388959	0.407	0.076	9.535608242277054e-154	MCE	AT1G15820	CP24,LHCB6	3 DAP	AT1G15820.1	7.685	0.021442	0.227522	1
5.985390395159074e-158	3.0893403350661703	0.299	0.037	1.3021216804668565e-153	MCE	AT2G14365	LCR84	3 DAP	NA	NA	NA	NA	NA
1.6325633271781596e-157	3.8981396044612726	0.123	0.007	3.551641518276086e-153	MCE	AT5G14740	BETA,CA18,CA2,DEG12	3 DAP	NA	NA	NA	NA	NA
4.753661549558081e-157	3.2012521070749838	0.232	0.028	1.0341590701063604e-152	MCE	AT2G26740	ATSEH,SEH	3 DAP	AT2G26740.1	0	1	1	1
7.187828334465446e-157	3.673009419641453	0.103	0.005	1.5637120541629578e-152	MCE	AT5G57480	NA	3 DAP	AT5G57480.1	0	1	1	1
4.925735030681186e-156	4.504907254890547	0.072	0.003	1.0715936559246919e-151	MCE	AT1G08787	NA	3 DAP	NA	NA	NA	NA	NA
4.901065299834358e-155	2.7606904046735643	0.332	0.061	1.0662267559789645e-150	MCE	AT5G49810	MMT	3 DAP	AT5G49810.1	0	1	1	1
6.787170618823245e-155	5.891506064621453	0.067	0.001	1.4765489681249968e-150	MCE	AT4G29370	NA	3 DAP	AT4G29370.1	9.434	0.008943	0.120129	1
1.8146052586814035e-154	5.242711595850672	0.067	0.001	3.9476737402613933e-150	MCE	AT1G79130	SAUR40	3 DAP	AT1G79130.1	0	1	1	1
6.649225642823397e-154	2.917004773629846	0.281	0.041	1.4465390385962302e-149	MCE	AT3G10780	NA	3 DAP	AT3G10780.1	6.792	0.033513	0.311847	1
9.163703965749017e-154	4.183075528403141	0.115	0.009	1.9935637977486986e-149	MCE	AT4G18150	NA	3 DAP	AT4G18150.1	0	1	1	1
9.458388182089619e-154	3.314609660134238	0.178	0.016	2.057672349013597e-149	MCE	AT2G04033	NA	3 DAP	NA	NA	NA	NA	NA
1.734043282659778e-152	5.452829361505635	0.059	0.001	3.7724111614263475e-148	MCE	AT5G09640	SCPL19,SNG2	3 DAP	AT5G09640.1	0.584	0.746884	1	1
4.572676274382933e-152	3.267727524465847	0.219	0.027	9.94785723492007e-148	MCE	AT3G30120	NA	3 DAP	NA	NA	NA	NA	NA
5.3502751961026825e-152	-3.52824	0.084	0.635	1.1639523689121386e-147	MCE	AT3G58780	AGL1,SHP1	3 DAP	AT3G58780.1	1.298	0.5226	1	1
5.3295352860461216e-151	2.337393502470925	0.379	0.074	1.1594404014793337e-146	MCE	AT1G08380	PSAO	3 DAP	AT1G08380.1	0.688	0.709078	1	1
1.0325991499457748e-150	2.509361466299675	0.424	0.078	2.246419450707033e-146	MCE	AT3G48231	LCR48	3 DAP	NA	NA	NA	NA	NA
3.3363494575789193e-150	2.598418931215253	0.406	0.09	7.258228244962939e-146	MCE	AT1G71360	AtSUN4,SUN4	3 DAP	AT1G71360.1	0	1	1	1
2.775207603123162e-149	2.865258820248939	0.211	0.026	6.037464140594439e-145	MCE	AT2G28830	AtPUB12,PUB12	3 DAP	AT2G28830.1	1.81	0.404553	1	1
3.8751069022607837e-149	2.3755741828354853	0.331	0.061	8.430295065868336e-145	MCE	AT3G20020	ATPRMT6,PRMT6	3 DAP	AT3G20020.1	0	1	1	1
6.210002610418108e-149	2.6987795625843223	0.336	0.064	1.3509860678964595e-144	MCE	AT3G57550	AGK2,GK-2	3 DAP	AT3G57550.1	0	1	1	1
4.3963913730953154e-148	2.5599721323373785	0.308	0.053	9.564349432168858e-144	MCE	AT5G58840	NA	3 DAP	NA	NA	NA	NA	NA
4.612606832498889e-148	2.459607022951662	0.449	0.094	1.0034726164101332e-143	MCE	AT2G04925	NA	3 DAP	AT2G04925.1	1.851	0.396371	1	1
7.485495872193832e-148	3.5945529883613503	0.181	0.017	1.6284696269957683e-143	MCE	AT3G59480	FRK4,FRK7	3 DAP	AT3G59480.1	0	1	1	1
1.111592324746546e-147	3.227565527668154	0.204	0.023	2.418269102486111e-143	MCE	AT5G10440	CYCD4;2	3 DAP	AT5G10440.1	7.842	0.019817	0.214479	1
1.1751711777892702e-146	2.5577073040858966	0.283	0.044	2.5565848972805573e-142	MCE	AT1G52230	PSAH-2,PSAH2,PSI-H	3 DAP	AT1G52230.1	0	1	1	1
2.485041356766166e-146	2.3137688760304793	0.303	0.054	5.406207471644794e-142	MCE	AT3G16140	PSAH-1	3 DAP	AT3G16140.1	1.746	0.4177	1	1
3.468961223093572e-146	4.264835689544883	0.12	0.008	7.546725140840066e-142	MCE	AT1G67390	NA	3 DAP	AT1G67390.1	12.522	0.001909	0.038271	1
2.12895455936142e-145	2.867269729992045	0.308	0.048	4.6315406438907695e-141	MCE	AT3G01329	NA	3 DAP	AT3G01329.1	2.028	0.362817	1	1
4.948093169000366e-144	4.436007292070481	0.072	0.003	1.0764576689160296e-139	MCE	AT3G05780	LON3	3 DAP	NA	NA	NA	NA	NA
2.0430303998552645e-143	5.614314466663785	0.059	0.001	4.444612634885128e-139	MCE	AT3G52561	NA	3 DAP	AT3G52561.1	0.143	0.930821	1	1
1.3485859175606772e-141	2.1362084895905498	0.57	0.19	2.9338486636532533e-137	MCE	AT2G39960	NA	3 DAP	AT2G39960.1	0	1	1	1
1.4231970465195897e-141	3.400476588029818	0.133	0.011	3.0961651747033675e-137	MCE	AT3G48180	NA	3 DAP	AT3G48180.1	4.704	0.095156	0.625855	1
9.50350931258558e-140	4.329212134974395	0.062	0.002	2.067488450952993e-135	MCE	AT3G01285	NA	3 DAP	NA	NA	NA	NA	NA
1.0810704344382573e-139	3.006839842593922	0.25	0.035	2.351868730120429e-135	MCE	AT2G35260	BCM1	3 DAP	AT2G35260.1	2.232	0.327584	1	1
1.3248339915997107e-139	7.111645239810439	0.067	0.001	2.8821763487251704e-135	MCE	AT1G35240	ARF20	3 DAP	NA	NA	NA	NA	NA
6.0637344893465144e-139	2.1798022895846794	0.295	0.048	1.3191654381573343e-134	MCE	AT4G08990	NA	3 DAP	NA	NA	NA	NA	NA
8.289077977197658e-139	-2.96314	0.169	0.631	1.8032889139393505e-134	MCE	AT4G36520	AUXILIN-LIKE4	3 DAP	AT4G36520.1	11.389	0.003365	0.058191	1
1.0549443974819703e-138	4.614903727329034	0.086	0.004	2.295031536722026e-134	MCE	AT2G03936	NA	3 DAP	AT2G03936.1	1.071	0.585365	1	1
1.5613852457120516e-138	2.7049800552509526	0.196	0.023	3.396793602046568e-134	MCE	AT3G48760	PAT5	3 DAP	AT3G48760.1	0	1	1	1
8.302013501350194e-138	3.4040086809802084	0.104	0.007	1.8061030372187346e-133	MCE	AT2G23320	AtWRKY15,WRKY15	3 DAP	AT2G23320.1	3.494	0.174271	0.927142	1
1.895167351592222e-137	3.3972862787182847	0.2	0.023	4.122936573388879e-133	MCE	AT1G10010	AAP8,ATAAP8	3 DAP	AT1G10010.1	4.749	0.093069	0.617268	1
1.9150580988828196e-137	4.978710862159562	0.04	0.001	4.1662088941195736e-133	MCE	AT4G23700	ATCHX17,CHX17	3 DAP	AT4G23700.1	0	1	1	1
6.201853293988232e-137	1.9025446900184373	0.651	0.215	1.3492131841071398e-132	MCE	AT1G67090	RBCS1A	3 DAP	NA	NA	NA	NA	NA
4.011333937777229e-136	3.86034	0.136	0.011	8.726656981634361e-132	MCE	AT3G11310	NA	3 DAP	NA	NA	NA	NA	NA
4.36063328269522e-136	2.862646265745162	0.246	0.038	9.486557706503451e-132	MCE	AT3G17040	HCF107	3 DAP	AT3G17040.1	0	1	1	1
9.626352861150366e-136	3.906357656863994	0.119	0.007	2.094213064943262e-131	MCE	AT3G55740	ATPROT2,PROT2	3 DAP	AT3G55740.1	0	1	1	1
2.3949831461674202e-135	4.270205484831485	0.079	0.004	5.210285834487223e-131	MCE	AT3G30823	NA	3 DAP	AT3G30823.1	0.073	0.964306	1	1
4.197850586323461e-135	5.699541741659299	0.042	0.001	9.13242395054669e-131	MCE	AT4G10201	NA	3 DAP	NA	NA	NA	NA	NA
1.1078677223817881e-133	2.8840924734088387	0.159	0.016	2.41016623004158e-129	MCE	AT1G66620	NA	3 DAP	AT1G66620.1	4.884	0.086982	0.590343	1
3.577436573146475e-132	3.7460827353896313	0.115	0.006	7.782713264880157e-128	MCE	AT3G16900	NA	3 DAP	AT3G16900.1	0.847	0.654654	1	1
4.344312771869392e-132	1.6830606309909442	0.762	0.351	9.451052435201862e-128	MCE	AT4G24130	NA	3 DAP	AT4G24130.1	0	1	1	1
6.344262820300406e-132	2.567695939854117	0.294	0.046	1.3801943765563534e-127	MCE	AT3G61470	LHCA2	3 DAP	AT3G61470.1	0.859	0.6509	1	1
6.944717658978813e-132	6.415302077682241	0.038	0	1.5108233267108408e-127	MCE	AT1G68750	ATPPC4,PPC4	3 DAP	AT1G68750.1	1.542	0.462638	1	1
7.598358887244966e-132	-2.83905	0.128	0.607	1.6530229759201424e-127	MCE	AT1G76880	DF1	3 DAP	AT1G76880.1	0	1	1	1
7.865446462103477e-132	-2.38908	0.264	0.725	1.7111278778306114e-127	MCE	AT4G15210	AT-BETA-AMY,ATBETA-AMY,BAM5,BMY1,RAM1	3 DAP	AT4G15210.1	0	1	1	1
9.564773097774349e-132	2.8239526998028515	0.528	0.188	2.0808163874208095e-127	MCE	AT5G16680	PAIPP2,PHD2	3 DAP	AT5G16680.1	0.331	0.847415	1	1
1.71732406109126e-131	2.4928590153360943	0.358	0.078	3.736038494904036e-127	MCE	AT5G19280	KAPP,RAG1	3 DAP	AT5G19280.1	10.923	0.004248	0.069145	1
3.657729526739475e-131	2.7177319750034314	0.264	0.041	7.957390585421727e-127	MCE	AT4G14690	ELIP2	3 DAP	NA	NA	NA	NA	NA
2.693033561903923e-130	2.8902100899228493	0.249	0.039	5.8586945139219846e-126	MCE	AT4G35560	DAW1,TMS-like	3 DAP	AT4G35560.1	0	1	1	1
8.833469339094772e-130	2.269912509757224	0.379	0.075	1.9217212547200675e-125	MCE	AT4G10340	LHCB5	3 DAP	AT4G10340.1	0	1	1	1
1.579478657769463e-129	4.161451349505122	0.103	0.006	3.4361558199774664e-125	MCE	AT3G26590	NA	3 DAP	AT3G26590.1	0	1	1	1
2.3612308198626716e-129	3.9264300679603394	0.121	0.01	5.136857648611243e-125	MCE	AT5G58810	NA	3 DAP	NA	NA	NA	NA	NA
2.5373295667220227e-129	2.6975958564036078	0.289	0.047	5.519960472403761e-125	MCE	AT1G71890	ATSUC5,SUC5	3 DAP	AT1G71890.1	0	1	1	1
4.4586729792898656e-129	3.729026233356021	0.061	0.002	9.699843066445102e-125	MCE	AT5G26810	NA	3 DAP	AT5G26810.1	10.74	0.004653	0.073922	1
6.581064755557763e-129	3.5002113145742393	0.199	0.022	1.4317106375715913e-124	MCE	AT2G16225	NA	3 DAP	NA	NA	NA	NA	NA
1.56039394494293e-128	4.920462374816723	0.055	0.002	3.394637027223344e-124	MCE	AT4G14272	NA	3 DAP	NA	NA	NA	NA	NA
2.862297297427748e-128	-2.51877	0.155	0.652	6.226927770554066e-124	MCE	AT2G01850	ATXTH27,EXGT-A3,XTH27	3 DAP	AT2G01850.1	0.002	0.999175	1	1
3.752055577941306e-128	3.8653339499309425	0.104	0.006	8.16259690981131e-124	MCE	AT1G17770	SDG17,SUVH7	3 DAP	NA	NA	NA	NA	NA
4.1308093328074236e-128	6.939594883236747	0.05	0.001	8.98657570352255e-124	MCE	AT1G34390	ARF22	3 DAP	NA	NA	NA	NA	NA
7.04113728872341e-128	3.846339735545435	0.082	0.004	1.531799417161778e-123	MCE	AT2G06090	NA	3 DAP	AT2G06090.1	1.512	0.469485	1	1
3.2025024053904025e-127	4.594959341151146	0.061	0.002	6.96704398292682e-123	MCE	AT2G15030	NA	3 DAP	NA	NA	NA	NA	NA
3.3410679814437705e-127	3.1530405702477067	0.169	0.018	7.268493393630922e-123	MCE	AT5G03480	NA	3 DAP	AT5G03480.1	18.238	1.1e-4	0.003803	1
4.418116747180762e-127	2.1505468537200665	0.404	0.095	9.611612983491748e-123	MCE	AT1G09370	NA	3 DAP	AT1G09370.1	0.664	0.717531	1	1
9.087322104041496e-127	3.9281924772517156	0.099	0.006	1.9769469237342275e-122	MCE	AT4G26390	NA	3 DAP	AT4G26390.1	0	1	1	1
3.2154355288222576e-126	5.2210403218976165	0.042	0.001	6.995179992952822e-122	MCE	AT3G46310	NA	3 DAP	AT3G46310.1	0.867	0.648093	1	1
9.663958440179961e-126	2.1990764700497007	0.403	0.105	2.1023941586611503e-121	MCE	AT1G25540	MED25,PFT1	3 DAP	AT1G25540.1	0	1	1	1
2.7727241490057985e-125	4.8557780202174445	0.069	0.002	6.032061386162115e-121	MCE	AT1G67070	DIN9,PMI2	3 DAP	AT1G67070.1	0	1	1	1
3.217723274613116e-125	2.2077120330699804	0.414	0.106	7.000156983920834e-121	MCE	AT1G66200	ATGSR2,GLN1;2,GSR2	3 DAP	AT1G66200.1	0	0.999975	1	1
5.488120779210976e-125	2.6850289216714276	0.279	0.051	1.1939406755173479e-120	MCE	AT2G25185	NA	3 DAP	AT2G25185.1	3.025	0.220359	1	1
1.0706700052274066e-124	4.612878691934798	0.072	0.003	2.329242596372223e-120	MCE	AT5G02570	HTB10	3 DAP	AT5G02570.1	0	1	1	1
1.5245848643049154e-124	2.7923618995345607	0.235	0.038	3.3167343722953436e-120	MCE	AT5G24320	NA	3 DAP	AT5G24320.1	0.153	0.92631	1	1
8.15715544521736e-124	4.124087814828165	0.071	0.003	1.7745891671070365e-119	MCE	AT4G14670	CLPB2	3 DAP	NA	NA	NA	NA	NA
2.6072319021793663e-123	-3.03546	0.125	0.582	5.672033003191211e-119	MCE	AT1G05490	chr31,CLSY3	3 DAP	AT1G05490.1	0	1	1	1
4.954118568639563e-123	3.164248943102888	0.148	0.015	1.077768494607537e-118	MCE	AT5G23212	NA	3 DAP	AT5G23212.1	0	1	1	1
1.3928537925709777e-122	-2.95006	0.111	0.604	3.030153425738162e-118	MCE	AT5G07990	CYP75B1,D501,TT7	3 DAP	AT5G07990.1	1.827	0.40116	1	1
1.5114140676967302e-122	5.729823833621995	0.055	0.001	3.2880813042742365e-118	MCE	AT1G15757	NA	3 DAP	AT1G15757.1	6.676	0.035507	0.323956	1
4.372137018912925e-122	2.5171485902376824	0.221	0.035	9.511584084645068e-118	MCE	AT5G27000	ATK4,KATD	3 DAP	AT5G27000.1	0	1	1	1
2.359424014959877e-121	2.6856114892153133	0.246	0.043	5.132926944545213e-117	MCE	AT1G74330	NA	3 DAP	AT1G74330.1	0	1	1	1
2.4998266754528752e-121	4.076230958912861	0.08	0.004	5.43837293244773e-117	MCE	AT1G79960	ATOFP14,OFP14	3 DAP	AT1G79960.1	0.079	0.961413	1	1
9.194827705158135e-121	5.553500214452592	0.041	0	2.0003347672571522e-116	MCE	AT1G28460	AGL59	3 DAP	AT1G28460.1	0	1	1	1
2.0023613120127474e-120	2.6399309383888454	0.289	0.056	4.356137034283732e-116	MCE	AT1G03770	ATRING1B,RING1B	3 DAP	AT1G03770.1	10.546	0.005127	0.079513	1
2.107266223929213e-120	3.5631132742520077	0.12	0.01	4.5843576701580024e-116	MCE	AT1G13680	PLCL1	3 DAP	AT1G13680.1	0	1	1	1
6.315919211055186e-120	2.4844275616468092	0.304	0.062	1.3740282243650556e-115	MCE	AT2G07180	PBL17	3 DAP	AT2G07180.1	0	1	1	1
1.4288940078031408e-119	4.145238856871154	0.092	0.006	3.108558913975733e-115	MCE	AT5G61290	NA	3 DAP	AT5G61290.1	1.135	0.567077	1	1
4.805597433736055e-119	3.027903607750427	0.157	0.017	1.0454577217092788e-114	MCE	AT1G70430	NA	3 DAP	AT1G70430.1	0.69	0.708311	1	1
1.3722156931332742e-118	3.990532934409811	0.071	0.003	2.985255240411438e-114	MCE	AT3G26742	NA	3 DAP	NA	NA	NA	NA	NA
1.1500679978865661e-117	3.5432820932535813	0.107	0.009	2.5019729294022245e-113	MCE	AT2G17500	PILS5	3 DAP	AT2G17500.1	0	1	1	1
1.4686390434417006e-117	1.8968634896054952	0.59	0.176	3.1950242390074195e-113	MCE	AT1G31250	NA	3 DAP	NA	NA	NA	NA	NA
1.91852863064148e-117	3.086915737216388	0.188	0.026	4.17375903596054e-113	MCE	AT1G24400	AATL2,ATLHT2,LHT2	3 DAP	AT1G24400.1	0	1	1	1
3.328481336940024e-117	3.976308088089829	0.079	0.004	7.241111148513023e-113	MCE	AT2G22790	NA	3 DAP	AT2G22790.1	23.931	6e-6	3.54e-4	1
4.56114356628082e-117	5.604519203384875	0.038	0.001	9.922767828443923e-113	MCE	AT4G15733	SCRL11	3 DAP	NA	NA	NA	NA	NA
3.026291039912916e-116	2.1917510112021934	0.337	0.067	6.583696157330549e-112	MCE	AT3G47470	CAB4,LHCA4	3 DAP	AT3G47470.1	0	1	1	1
6.103520774328853e-116	5.769695490776696	0.041	0.001	1.3278209444552418e-111	MCE	AT5G04937	NA	3 DAP	NA	NA	NA	NA	NA
3.808840899658766e-115	3.7356139653468317	0.121	0.011	8.286133377207646e-111	MCE	AT2G42340	NA	3 DAP	NA	NA	NA	NA	NA
4.714997797369052e-115	3.3759890377155415	0.138	0.013	1.0257477708176373e-110	MCE	AT3G14940	ATPPC3,PPC3	3 DAP	AT3G14940.1	0	1	1	1
6.302647065203325e-115	3.4035589523059366	0.17	0.018	1.3711408690349835e-110	MCE	AT2G40960	NA	3 DAP	AT2G40960.1	1.635	0.441589	1	1
1.1756275348427252e-114	2.7039433705993643	0.278	0.049	2.5575777020503487e-110	MCE	AT1G02690	IMPA-6	3 DAP	AT1G02690.1	0	1	1	1
1.8074234462398745e-114	4.925869493748088	0.045	0.001	3.932049707294847e-110	MCE	AT1G18760	NA	3 DAP	AT1G18760.1	8.589	0.013644	0.164365	1
2.053978933331333e-114	1.9849328302395897	0.344	0.081	4.468431169462315e-110	MCE	AT3G54960	ATPDI1,ATPDIL1-3,PDI1,PDIL1-3	3 DAP	AT3G54960.1	1.029	0.59775	1	1
7.857404643263737e-114	5.685652634848193	0.04	0	1.709378380142026e-109	MCE	AT2G34850	MEE25	3 DAP	NA	NA	NA	NA	NA
9.273236448842449e-114	5.387247843476121	0.043	0.001	2.0173925894456747e-109	MCE	AT4G10220	NA	3 DAP	AT4G10220.1	0	1	1	1
2.0037096123578654e-113	2.409459957785211	0.285	0.057	4.3590702616845365e-109	MCE	AT4G17895	UBP20	3 DAP	AT4G17895.1	1.669	0.434108	1	1
2.342773731186443e-113	1.9454219997792257	0.495	0.15	5.096704252196107e-109	MCE	AT1G29930	AB140,CAB1,CAB140,LHCB1.3	3 DAP	AT1G29930.1	0.002	0.999119	1	1
3.526338614349817e-113	2.3351096288199424	0.318	0.073	7.671549655518026e-109	MCE	AT5G05930	ATGC1,GC1	3 DAP	AT5G05930.1	0	1	1	1
4.331245387214894e-113	4.759620924397568	0.05	0.002	9.422624339886002e-109	MCE	AT1G29962	AGL64	3 DAP	AT1G29962.1	0	1	1	1
6.425086726870413e-113	2.3952434952914152	0.282	0.049	1.3977776174306582e-108	MCE	AT3G15450	NA	3 DAP	AT3G15450.1	0	1	1	1
4.637921510347787e-112	8.185666392506512	0.022	0	1.0089798245761612e-107	MCE	AT5G04933	NA	3 DAP	NA	NA	NA	NA	NA
5.621554303156486e-112	3.0543579756902313	0.142	0.016	1.2229691386516936e-107	MCE	AT5G49680	NA	3 DAP	NA	NA	NA	NA	NA
1.0420035328779812e-111	3.3520528049505067	0.116	0.01	2.266878685776048e-107	MCE	AT3G11165	NA	3 DAP	NA	NA	NA	NA	NA
[truncated: 270,719+ more rows]

## Sheet: 4. GO for M2a-M1a-sig CZE DE
	ID	Description	GeneRatio	BgRatio	pvalue	p.adjust	qvalue	geneID	Count	general category
[truncated: 31 more rows]
